# Supplementary material for: Switching on emission in Zn(ii) coordination complexes by tempering Namido character
Source: Royal Society of Chemistry journal article supplement (doi:10.1039/d3cc06227a), 2024-01-01
Supplement: d3cc06227a1.pdf [file d3cc06227a1.pdf]

# *Supporting Information*

*for*

## Switching On Emission in Zn(II) Coordination Complexes by Tempering N<sub>amido</sub> Character

*Amy L. Knodel,<sup>a</sup> Issiah B. Lozada,<sup>a</sup> Robert J. Ortiz,<sup>a</sup> J. A. Gareth Williams<sup>b\*</sup> and David E.*

*Herbert<sup>a\*</sup>*

<sup>a</sup> Department of Chemistry and the Manitoba Institute for Materials, University of Manitoba, 144  
Dysart Road, Winnipeg, Manitoba, R3T 2N2, Canada; \*david.herbert@umanitoba.ca

<sup>b</sup> Department of Chemistry, Durham University, Durham, DH1 3LE, UK;  
\*j.a.g.williams@durham.ac.uk

## TABLE OF CONTENTS

|                                                                                                                                                                                                                                                                                                                                                                          |    |
|--------------------------------------------------------------------------------------------------------------------------------------------------------------------------------------------------------------------------------------------------------------------------------------------------------------------------------------------------------------------------|----|
| Experimental Details.....                                                                                                                                                                                                                                                                                                                                                | 12 |
| X-ray crystallography .....                                                                                                                                                                                                                                                                                                                                              | 16 |
| Computational Modelling .....                                                                                                                                                                                                                                                                                                                                            | 17 |
| Electronic Absorption and Emission Spectroscopy Figures .....                                                                                                                                                                                                                                                                                                            | 19 |
| <b>Figure S1.</b> Equimolar solutions (approx. 0.10 mM) of proligands (a) in ambient light and (b) under UV irradiation (355 nm). For each image, from left to right: <i>t</i> BuL1, CF <sup>3</sup> L1, CF <sup>3</sup> L2, <i>t</i> BuL3. ....                                                                                                                         | 19 |
| <b>Figure S2.</b> Equimolar solutions (approx. 0.10 mM) of complexes (a) in ambient light and (b) under UV irradiation (355 nm). For each image, from left to right: ( <i>t</i> BuL1)ZnCl <sub>2</sub> , (CF <sup>3</sup> L1)ZnCl <sub>2</sub> , (CF <sup>3</sup> L2) <sub>2</sub> Zn, ( <i>t</i> BuL3) <sub>2</sub> Zn. ....                                            | 19 |
| <b>Figure S3.</b> Molar absorptivity of (a) <sup>R</sup> L1 / ( <sup>R</sup> L1)ZnCl <sub>2</sub> and (b) CF <sup>3</sup> L2 / (CF <sup>3</sup> L2) <sub>2</sub> Zn / <i>t</i> BuL3 / ( <i>t</i> BuL3) <sub>2</sub> Zn in CH <sub>2</sub> Cl <sub>2</sub> at 295 K. ....                                                                                                 | 20 |
| <b>Figure S4.</b> Normalized UV-Vis absorption spectra of equimolar solutions (1.0 x 10 <sup>-4</sup> M) of (a) (CF <sup>3</sup> L2) <sub>2</sub> Zn and (b) ( <i>t</i> BuL3) <sub>2</sub> Zn in solvents of varying polarities at 295 K.....                                                                                                                            | 21 |
| <b>Figure S5.</b> Emission spectra of equimolar solutions (1.0 x 10 <sup>-4</sup> M) of (a) (CF <sup>3</sup> L2) <sub>2</sub> Zn and (b) ( <i>t</i> BuL3) <sub>2</sub> Zn in solvents of varying polarities at 295 K. ....                                                                                                                                               | 21 |
| <b>Figure S6.</b> Emission and excitation spectra in CH <sub>2</sub> Cl <sub>2</sub> at 295 K (red and black lines respectively, registered at the λ <sub>ex</sub> and λ <sub>em</sub> values shown), and emission in EPA at 77 K (blue lines, at the same λ <sub>ex</sub> ), for the zinc complexes indicated (left) and for the corresponding proligands (right). .... | 22 |
| <b>Figure S7.</b> Normalized emission spectra in the solid state at 295 K: (CF <sup>3</sup> L1)ZnCl <sub>2</sub> (λ <sub>ex</sub> = 380 nm, blue line), ( <i>t</i> BuL1)ZnCl <sub>2</sub> (λ <sub>ex</sub> = 400 nm, green line), and (CF <sup>3</sup> L2) <sub>2</sub> Zn (λ <sub>ex</sub> = 400 nm, red line). ....                                                    | 23 |
| <b>Table S1.</b> Comparison of selected photophysical properties of Zn(II) systems.....                                                                                                                                                                                                                                                                                  | 24 |
| Structural Figures and Tables .....                                                                                                                                                                                                                                                                                                                                      | 24 |
| <b>Figure S8.</b> Comparison of C–N bond lengths of (a) (CF <sup>3</sup> L1)ZnCl <sub>2</sub> , (b) (CF <sup>3</sup> L2) <sub>2</sub> Zn, and (c) ( <i>t</i> BuL3) <sub>2</sub> Zn in the solid state. Hydrogen atoms and solvent molecules omitted for clarity. Solid-state structure of ( <i>t</i> BuL3) <sub>2</sub> Zn reproduced from Reference 1.....              | 25 |
| <b>Figure S9.</b> Torsion angles between ring fragments and phenanthridinyl planes in solid-state structures of (CF <sup>3</sup> L2) <sub>2</sub> Zn (C–N–C–N) and ( <i>t</i> BuL3) <sub>2</sub> Zn (C–N–C–C). Hydrogen atoms and solvent molecules omitted for clarity. Solid-state structure of ( <i>t</i> BuL3) <sub>2</sub> Zn reproduced from Reference 2. ....     | 25 |
| <b>Figure S10.</b> Atomic labels for Tables S2–S5.....                                                                                                                                                                                                                                                                                                                   | 26 |
| <b>Table S2.</b> Comparison of experimentally determined and calculated <sup>a</sup> bond distances (Å) and angles (°) for (CF <sup>3</sup> L1)ZnCl <sub>2</sub> . See Figure S10 for numbering scheme. ....                                                                                                                                                             | 27 |
| <b>Table S3.</b> Comparison of experimentally determined and calculated <sup>a</sup> bond distances (Å) and angles (°) for (CF <sup>3</sup> L2) <sub>2</sub> Zn. See Figure S10 for numbering scheme. ....                                                                                                                                                               | 28 |

|                                                                                                                                                                                                                                                                                                                                                                                                                                                                                                                                               |    |
|-----------------------------------------------------------------------------------------------------------------------------------------------------------------------------------------------------------------------------------------------------------------------------------------------------------------------------------------------------------------------------------------------------------------------------------------------------------------------------------------------------------------------------------------------|----|
| <b>Table S4.</b> Comparison of experimentally determined and calculated <sup>a</sup> bond distances (Å) and angles (°) for ( <sup>t</sup> BuL3) <sub>2</sub> Zn. Solid state structure of ( <sup>t</sup> BuL3) <sub>2</sub> Zn reproduced from Reference <sup>1</sup> . See Figure S10 for numbering scheme. ....                                                                                                                                                                                                                             | 29 |
| <b>Table S5.</b> Comparison of solid-state structure bond distances (Å) and angles (°) of complexes of varying N <sub>amido</sub> character. Solid state structure of ( <sup>t</sup> BuL3) <sub>2</sub> Zn reproduced from Reference <sup>1</sup> . See Figure S10 for numbering scheme. ....                                                                                                                                                                                                                                                 | 30 |
| <b>Figure S11.</b> Select calculated bond distances (Å) at the S <sub>0</sub> , S <sub>1</sub> , and T <sub>1</sub> optimized <sup>a</sup> geometries. ....                                                                                                                                                                                                                                                                                                                                                                                   | 31 |
| <b>Figure S12.</b> Torsion angles between ring fragments and phenanthridinyl planes in (a) S <sub>0</sub> , (b) S <sub>1</sub> , and (c) T <sub>1</sub> optimized geometries of (CF <sub>3</sub> L2) <sub>2</sub> Zn (C-N-C-N) and ( <sup>t</sup> BuL3) <sub>2</sub> Zn (C-N-C-C). Hydrogens omitted for clarity. ....                                                                                                                                                                                                                        | 32 |
| Computational Figures and Tables .....                                                                                                                                                                                                                                                                                                                                                                                                                                                                                                        | 33 |
| <b>Figure S13.</b> Defined fragments for Tables S8, S10, S12, and S14. C=N sub-fragments are indicated in figure by bolded line and lettering. ....                                                                                                                                                                                                                                                                                                                                                                                           | 33 |
| <b>Figure S14.</b> Normalized experimental UV-Vis absorption spectrum (solid trace, dichloromethane), normalized TD-DFT simulated spectrum (dotted trace, FWHM = 0.35 eV, SMD “dichloromethane”), predicted singlet-singlet vertical excitation energies ( <i>f</i> <sub>osc</sub> > 0.07), and electron-hole density maps (yellow = hole; blue = electron; isosurface value = 0.001) for the lowest-energy vertical electronic transitions of (a) (CF <sub>3</sub> L1)ZnCl <sub>2</sub> and (b) ( <sup>t</sup> BuL1)ZnCl <sub>2</sub> . .... | 33 |
| <b>Figure S15.</b> Jablonski diagram for (a) (CF <sub>3</sub> L1)ZnCl <sub>2</sub> and (b) ( <sup>t</sup> BuL1)ZnCl <sub>2</sub> along the Zn-N <sub>guanidine</sub> bond at the equilibrium S <sub>0</sub> and S <sub>1</sub> optimized geometries, with electron-hole density maps (yellow = hole; blue = electron; isosurface value = 0.001). ....                                                                                                                                                                                         | 34 |
| <b>Table S6.</b> TD-DFT predicted singlet-singlet vertical excitation energies, oscillator strengths ( <i>f</i> <sub>osc</sub> > 0.07), and MO pair contributions (>10%) below 4 eV for (CF <sub>3</sub> L1)ZnCl <sub>2</sub> in dichloromethane. H=HOMO; L=LUMO. ....                                                                                                                                                                                                                                                                        | 34 |
| <b>Table S7.</b> Fragment contributions to select ground-state MOs of (CF <sub>3</sub> L1)ZnCl <sub>2</sub> in dichloromethane. ....                                                                                                                                                                                                                                                                                                                                                                                                          | 34 |
| <b>Table S8.</b> TD-DFT predicted singlet-singlet vertical excitation energies, oscillator strengths ( <i>f</i> <sub>osc</sub> > 0.07), and MO pair contributions (>10%) below 4 eV for ( <sup>t</sup> BuL1)ZnCl <sub>2</sub> in dichloromethane. H=HOMO; L=LUMO. ....                                                                                                                                                                                                                                                                        | 35 |
| <b>Table S9.</b> Fragment contributions to select ground-state MOs of ( <sup>t</sup> BuL1)ZnCl <sub>2</sub> in dichloromethane. ....                                                                                                                                                                                                                                                                                                                                                                                                          | 35 |
| <b>Figure S16.</b> Normalized experimental UV-Vis absorption spectrum (solid trace), normalized TD-DFT simulated spectrum (dotted trace, FWHM = 0.35 eV), predicted singlet-singlet vertical excitation energies ( <i>f</i> <sub>osc</sub> > 0.05), and electron-hole density maps (yellow = hole; blue = electron; isosurface value = 0.001) for the lowest-energy vertical electronic transitions of (CF <sub>3</sub> L2) <sub>2</sub> Zn in (a) dichloromethane, (b) diethyl ether, (c) toluene, and (d) n-hexane. ....                    | 36 |
| <b>Figure S17.</b> Jablonski diagram in the singlet manifold for (CF <sub>3</sub> L2) <sub>2</sub> Zn along the Zn-N <sub>pyrimidine</sub> bond at the equilibrium S <sub>0</sub> and S <sub>1</sub> optimized geometries, with electron-hole density maps (yellow = hole; blue = electron; isosurface value = 0.001) in (a) dichloromethane, (b) diethyl ether, (c) toluene, and (d) n-hexane. ....                                                                                                                                          | 37 |

|                                                                                                                                                                                                                                                                                                                                                                                                                                                                                                         |    |
|---------------------------------------------------------------------------------------------------------------------------------------------------------------------------------------------------------------------------------------------------------------------------------------------------------------------------------------------------------------------------------------------------------------------------------------------------------------------------------------------------------|----|
| <b>Figure S18.</b> Jablonski diagram with $T_1$ states for $(\text{CF}_3\text{L2})_2\text{Zn}$ along the Zn- $\text{N}_{\text{pyrimidine}}$ bond at the equilibrium $S_0$ , $S_1$ , and $T_1$ optimized geometries, with spin density maps (isosurface value = 0.004) in (a) dichloromethane, (b) toluene and (c) n-hexane. ....                                                                                                                                                                        | 38 |
| <b>Table S10.</b> TD-DFT predicted singlet-singlet vertical excitation energies, oscillator strengths ( $f_{\text{osc}} > 0.05$ ), and MO pair contributions ( $>10\%$ ) for $(\text{CF}_3\text{L2})_2\text{Zn}$ in dichloromethane. H=HOMO; L=LUMO .....                                                                                                                                                                                                                                               | 38 |
| <b>Table S11.</b> Fragment contributions to select ground-state MOs of $(\text{CF}_3\text{L2})_2\text{Zn}$ in dichloromethane.....                                                                                                                                                                                                                                                                                                                                                                      | 39 |
| <b>Table S12.</b> TD-DFT predicted singlet-singlet vertical excitation energies, oscillator strengths ( $f_{\text{osc}} > 0.05$ ), and MO pair contributions ( $>10\%$ ) for $(\text{CF}_3\text{L2})_2\text{Zn}$ in diethyl ether. H=HOMO; L=LUMO .....                                                                                                                                                                                                                                                 | 39 |
| <b>Table S13.</b> Fragment contributions to select ground-state MOs of $(\text{CF}_3\text{L2})_2\text{Zn}$ in diethyl ether. ....                                                                                                                                                                                                                                                                                                                                                                       | 39 |
| <b>Table S14.</b> TD-DFT predicted singlet-singlet vertical excitation energies, oscillator strengths ( $f_{\text{osc}} > 0.05$ ), and MO pair contributions ( $>10\%$ ) for $(\text{CF}_3\text{L2})_2\text{Zn}$ in toluene. H=HOMO; L=LUMO .....                                                                                                                                                                                                                                                       | 40 |
| <b>Table S15.</b> Fragment contributions to select ground-state MOs of $(\text{CF}_3\text{L2})_2\text{Zn}$ in toluene.....                                                                                                                                                                                                                                                                                                                                                                              | 40 |
| <b>Table S16.</b> TD-DFT predicted singlet-singlet vertical excitation energies, oscillator strengths ( $f_{\text{osc}} > 0.05$ ), and MO pair contributions ( $>10\%$ ) for $(\text{CF}_3\text{L2})_2\text{Zn}$ in n-hexane. H=HOMO; L=LUMO .....                                                                                                                                                                                                                                                      | 40 |
| <b>Table S17.</b> Fragment contributions to select ground-state MOs of $(\text{CF}_3\text{L2})_2\text{Zn}$ in n-hexane...                                                                                                                                                                                                                                                                                                                                                                               | 41 |
| <b>Figure S19.</b> Normalized experimental UV-Vis absorption spectrum (solid trace), normalized TD-DFT simulated spectrum (dotted trace, FWHM = 0.35 eV), predicted singlet-singlet vertical excitation energies ( $f_{\text{osc}} > 0.08$ ), and electron-hole density maps (yellow = hole; blue = electron; isosurface value = 0.001) for the lowest-energy vertical electronic transitions of $(\text{tBuL3})_2\text{Zn}$ (a) dichloromethane, (b) diethyl ether, (c) toluene, and (d) n-hexane..... | 42 |
| <b>Figure S20.</b> Jablonski diagram in the singlet manifold for $(\text{tBuL3})_2\text{Zn}$ along the Zn- $\text{N}_{\text{phenyl}}$ bond at the equilibrium $S_0$ and $S_1$ optimized geometries, with electron-hole density maps (yellow = hole; blue = electron; isosurface value = 0.001) in (a) dichloromethane, (b) diethyl ether, (c) toluene, and (d) n-hexane.....                                                                                                                            | 43 |
| <b>Figure S21.</b> Jablonski diagram with $T_1$ states for $(\text{tBuL3})_2\text{Zn}$ along the Zn- $\text{N}_{\text{phenyl}}$ bond at the equilibrium $S_0$ , $S_1$ , and $T_1$ optimized geometries, with spin density maps (isosurface value = 0.004) in (a) dichloromethane, (b) toluene, and (c) n-hexane. Diethyl ether is omitted due to complications with calculations.....                                                                                                                   | 44 |
| <b>Table S18.</b> TD-DFT predicted singlet-singlet vertical excitation energies, oscillator strengths ( $f_{\text{osc}} > 0.08$ ), and MO pair contributions ( $>10\%$ ) for $(\text{tBuL3})_2\text{Zn}$ in dichloromethane. H=HOMO; L=LUMO .....                                                                                                                                                                                                                                                       | 45 |
| <b>Table S19.</b> Fragment contributions to select ground-state MOs of $(\text{tBuL3})_2\text{Zn}$ in dichloromethane.....                                                                                                                                                                                                                                                                                                                                                                              | 45 |

|                                                                                                                                                                                                                                                                                                                                                                                                                                   |    |
|-----------------------------------------------------------------------------------------------------------------------------------------------------------------------------------------------------------------------------------------------------------------------------------------------------------------------------------------------------------------------------------------------------------------------------------|----|
| <b>Table S20.</b> TD-DFT predicted singlet-singlet vertical excitation energies, oscillator strengths ( $f_{\text{osc}} > 0.08$ ), and MO pair contributions ( $>10\%$ ) for $(^t\text{BuL3})_2\text{Zn}$ in diethyl ether. H=HOMO; L=LUMO .....                                                                                                                                                                                  | 45 |
| <b>Table S21.</b> Fragment contributions to select ground-state MOs of $(^t\text{BuL3})_2\text{Zn}$ in diethyl ether. ....                                                                                                                                                                                                                                                                                                        | 46 |
| <b>Table S22.</b> TD-DFT predicted singlet-singlet vertical excitation energies, oscillator strengths ( $f_{\text{osc}} > 0.08$ ), and MO pair contributions ( $>10\%$ ) for $(^t\text{BuL3})_2\text{Zn}$ in toluene. H=HOMO; L=LUMO .....                                                                                                                                                                                        | 46 |
| <b>Table S23.</b> Fragment contributions to select ground-state MOs of $(^t\text{BuL3})_2\text{Zn}$ in toluene.....                                                                                                                                                                                                                                                                                                               | 46 |
| <b>Table S24.</b> TD-DFT predicted singlet-singlet vertical excitation energies, oscillator strengths ( $f_{\text{osc}} > 0.08$ ), and MO pair contributions ( $>10\%$ ) for $(^t\text{BuL3})_2\text{Zn}$ in n-hexane. H=HOMO; L=LUMO .....                                                                                                                                                                                       | 47 |
| <b>Table S25.</b> Fragment contributions to select ground-state MOs of $(^t\text{BuL3})_2\text{Zn}$ in n-hexane....                                                                                                                                                                                                                                                                                                               | 47 |
| <b>Figure S22.</b> Ground-state frontier molecular orbital energy level diagram and isosurfaces (isovalue = 0.04) of the four complexes calculated in dichloromethane. From left to right: $(\text{CF}_3\text{L1})\text{ZnCl}_2$ (HOMO – 1 to LUMO +1), $(^t\text{BuL1})\text{ZnCl}_2$ (HOMO – 1 to LUMO +1), $(\text{CF}_3\text{L2})_2\text{Zn}$ (HOMO – 3 to LUMO +3), $(^t\text{BuL3})_2\text{Zn}$ (HOMO – 3 to LUMO +3). .... | 48 |
| <b>Figure S23.</b> Ground-state frontier molecular orbital energy level diagram and isosurfaces (isovalue = 0.04) of $(\text{CF}_3\text{L2})_2\text{Zn}$ (HOMO – 3 to LUMO +3). From left to right: dichloromethane, diethyl ether, toluene, n-hexane. ....                                                                                                                                                                       | 49 |
| <b>Figure S24.</b> Ground-state frontier molecular orbital energy level diagram and isosurfaces (isovalue = 0.04) of $(^t\text{BuL3})_2\text{Zn}$ (HOMO – 3 to LUMO +3). From left to right: dichloromethane, diethyl ether, toluene, n-hexane. ....                                                                                                                                                                              | 50 |
| <b>Table S26.</b> Spin-orbit coupling matrix elements for $(\text{CF}_3\text{L2})_2\text{Zn}$ between the five lowest-lying excited triplet states with the ground state and two lowest-lying excited singlet states calculated in dichloromethane at the optimized ground state geometry. ....                                                                                                                                   | 51 |
| <b>Table S27.</b> Spin-orbit coupling matrix elements for $(\text{CF}_3\text{L2})_2\text{Zn}$ between the five lowest-lying excited triplet states with the ground state and two lowest-lying excited singlet states calculated in diethyl ether at the optimized ground state geometry.....                                                                                                                                      | 51 |
| <b>Table S28.</b> Spin-orbit coupling matrix elements for $(\text{CF}_3\text{L2})_2\text{Zn}$ between the five lowest-lying excited triplet states with the ground state and two lowest-lying excited singlet states calculated in toluene at the optimized ground state geometry. ....                                                                                                                                           | 52 |
| <b>Table S29.</b> Spin-orbit coupling matrix elements for $(\text{CF}_3\text{L2})_2\text{Zn}$ between the five lowest-lying excited triplet states with the ground state and two lowest-lying excited singlet states calculated in n-hexane at the optimized ground state geometry. ....                                                                                                                                          | 52 |
| <b>Table S30.</b> Spin-orbit coupling matrix elements for $(^t\text{BuL3})_2\text{Zn}$ between the five lowest-lying excited triplet states with the ground state and two lowest-lying excited singlet states calculated in dichloromethane at the optimized ground state geometry. ....                                                                                                                                          | 53 |
| <b>Table S31.</b> Spin-orbit coupling matrix elements for $(^t\text{BuL3})_2\text{Zn}$ between the five lowest-lying excited triplet states with the ground state and two lowest-lying excited singlet states calculated in diethyl ether at the optimized ground state geometry.....                                                                                                                                             | 53 |

|                                                                                                                                                                                                                                                                                                                                                                                                        |    |
|--------------------------------------------------------------------------------------------------------------------------------------------------------------------------------------------------------------------------------------------------------------------------------------------------------------------------------------------------------------------------------------------------------|----|
| <b>Table S32.</b> Spin-orbit coupling matrix elements for ( <i>t</i> BuL3) <sub>2</sub> Zn between the five lowest-lying excited triplet states with the ground state and two lowest-lying excited singlet states calculated in toluene at the optimized ground state geometry. ....                                                                                                                   | 54 |
| <b>Table S33.</b> Spin-orbit coupling matrix elements for ( <i>t</i> BuL3) <sub>2</sub> Zn between the five lowest-lying excited triplet states with the ground state and two lowest-lying excited singlet states calculated in n-hexane at the optimized ground state geometry. ....                                                                                                                  | 54 |
| <b>Figure S25.</b> NBO results for complexes of varying N <sub>amido</sub> character. ....                                                                                                                                                                                                                                                                                                             | 55 |
| <b>Figure S26.</b> Solvated NBO results for select complexes of varying N <sub>amido</sub> character. ....                                                                                                                                                                                                                                                                                             | 55 |
| <b>Figure S27.</b> Atomic labels for NBO tables. Top, from left to right: (CF <sub>3</sub> L1)ZnCl <sub>2</sub> , ( <i>t</i> BuL1)ZnCl <sub>2</sub> , (CF <sub>3</sub> L2) <sub>2</sub> Zn, ( <i>t</i> BuL3) <sub>2</sub> Zn. Bottom, from left to right: (Me <sup>^</sup> MeL3) <sub>2</sub> Zn, (CF <sub>3</sub> L4) <sub>2</sub> Zn, ( <i>t</i> BuL4) <sub>2</sub> Zn, (MeL4) <sub>2</sub> Zn. .... | 56 |
| <b>Table S34.</b> NBO analysis <sup>a</sup> of (CF <sub>3</sub> L1)ZnCl <sub>2</sub> with the M06-L functional. ....                                                                                                                                                                                                                                                                                   | 57 |
| <b>Table S35.</b> NBO analysis <sup>a</sup> of (CF <sub>3</sub> L1)ZnCl <sub>2</sub> with the TPSSh functional. ....                                                                                                                                                                                                                                                                                   | 58 |
| <b>Table S36.</b> NBO analysis <sup>a</sup> of (CF <sub>3</sub> L1)ZnCl <sub>2</sub> with the O3LYP functional. ....                                                                                                                                                                                                                                                                                   | 59 |
| <b>Table S37.</b> NBO analysis <sup>a</sup> of (CF <sub>3</sub> L1)ZnCl <sub>2</sub> with the B3LYP functional. ....                                                                                                                                                                                                                                                                                   | 60 |
| <b>Table S38.</b> NBO analysis <sup>a</sup> of (CF <sub>3</sub> L1)ZnCl <sub>2</sub> with the PBE0 functional. ....                                                                                                                                                                                                                                                                                    | 61 |
| <b>Table S39.</b> NBO analysis <sup>a</sup> of (CF <sub>3</sub> L1)ZnCl <sub>2</sub> with the M06 functional. ....                                                                                                                                                                                                                                                                                     | 62 |
| <b>Table S40.</b> NBO analysis <sup>a</sup> of (CF <sub>3</sub> L1)ZnCl <sub>2</sub> with the M06-2X functional. ....                                                                                                                                                                                                                                                                                  | 63 |
| <b>Table S41.</b> NBO analysis <sup>a</sup> of (CF <sub>3</sub> L1)ZnCl <sub>2</sub> with the CAM-B3LYP functional. ....                                                                                                                                                                                                                                                                               | 64 |
| <b>Table S42.</b> Solvated NBO analysis <sup>a</sup> of (CF <sub>3</sub> L1)ZnCl <sub>2</sub> with the M06-L functional. ....                                                                                                                                                                                                                                                                          | 65 |
| <b>Table S43.</b> Solvated NBO analysis <sup>a</sup> of (CF <sub>3</sub> L1)ZnCl <sub>2</sub> with the TPSSh functional. ....                                                                                                                                                                                                                                                                          | 66 |
| <b>Table S44.</b> Solvated NBO analysis <sup>a</sup> of (CF <sub>3</sub> L1)ZnCl <sub>2</sub> with the O3LYP functional. ....                                                                                                                                                                                                                                                                          | 67 |
| <b>Table S45.</b> Solvated NBO analysis <sup>a</sup> of (CF <sub>3</sub> L1)ZnCl <sub>2</sub> with the B3LYP functional. ....                                                                                                                                                                                                                                                                          | 68 |
| <b>Table S46.</b> Solvated NBO analysis <sup>a</sup> of (CF <sub>3</sub> L1)ZnCl <sub>2</sub> with the PBE0 functional. ....                                                                                                                                                                                                                                                                           | 69 |
| <b>Table S47.</b> Solvated NBO analysis <sup>a</sup> of (CF <sub>3</sub> L1)ZnCl <sub>2</sub> with the M06 functional. ....                                                                                                                                                                                                                                                                            | 70 |
| <b>Table S48.</b> Solvated NBO analysis <sup>a</sup> of (CF <sub>3</sub> L1)ZnCl <sub>2</sub> with the M06-2X functional. ....                                                                                                                                                                                                                                                                         | 71 |
| <b>Table S49.</b> Solvated NBO analysis <sup>a</sup> of (CF <sub>3</sub> L1)ZnCl <sub>2</sub> with the CAM-B3LYP functional. ....                                                                                                                                                                                                                                                                      | 72 |
| <b>Table S50.</b> NBO analysis <sup>a</sup> of ( <i>t</i> BuL1)ZnCl <sub>2</sub> with the M06-L functional. ....                                                                                                                                                                                                                                                                                       | 73 |
| <b>Table S51.</b> NBO analysis <sup>a</sup> of ( <i>t</i> BuL1)ZnCl <sub>2</sub> with the TPSSh functional. ....                                                                                                                                                                                                                                                                                       | 74 |
| <b>Table S52.</b> NBO analysis <sup>a</sup> of ( <i>t</i> BuL1)ZnCl <sub>2</sub> with the O3LYP functional. ....                                                                                                                                                                                                                                                                                       | 75 |
| <b>Table S53.</b> NBO analysis <sup>a</sup> of ( <i>t</i> BuL1)ZnCl <sub>2</sub> with the B3LYP functional. ....                                                                                                                                                                                                                                                                                       | 76 |
| <b>Table S54.</b> NBO analysis <sup>a</sup> of ( <i>t</i> BuL1)ZnCl <sub>2</sub> with the PBE0 functional. ....                                                                                                                                                                                                                                                                                        | 77 |
| <b>Table S55.</b> NBO analysis <sup>a</sup> of ( <i>t</i> BuL1)ZnCl <sub>2</sub> with the M06 functional. ....                                                                                                                                                                                                                                                                                         | 78 |
| <b>Table S56.</b> NBO analysis <sup>a</sup> of ( <i>t</i> BuL1)ZnCl <sub>2</sub> with the M06-2X functional. ....                                                                                                                                                                                                                                                                                      | 79 |
| <b>Table S57.</b> NBO analysis <sup>a</sup> of ( <i>t</i> BuL1)ZnCl <sub>2</sub> with the CAM-B3LYP functional. ....                                                                                                                                                                                                                                                                                   | 80 |
| <b>Table S58.</b> NBO analysis <sup>a</sup> of (CF <sub>3</sub> L2) <sub>2</sub> Zn with the M06-L functional. ....                                                                                                                                                                                                                                                                                    | 81 |

|                                                                                                                                  |     |
|----------------------------------------------------------------------------------------------------------------------------------|-----|
| <b>Table S59.</b> NBO analysis <sup>a</sup> of (CF <sup>3</sup> L2) <sub>2</sub> Zn with the TPSSh functional. ....              | 82  |
| <b>Table S60.</b> NBO analysis <sup>a</sup> of (CF <sup>3</sup> L2) <sub>2</sub> Zn with the O3LYP functional. ....              | 83  |
| <b>Table S61.</b> NBO analysis <sup>a</sup> of (CF <sup>3</sup> L2) <sub>2</sub> Zn with the B3LYP functional. ....              | 84  |
| <b>Table S62.</b> NBO analysis <sup>a</sup> of (CF <sup>3</sup> L2) <sub>2</sub> Zn with the PBE0 functional. ....               | 85  |
| <b>Table S63.</b> NBO analysis <sup>a</sup> of (CF <sup>3</sup> L2) <sub>2</sub> Zn with the M06 functional. ....                | 86  |
| <b>Table S64.</b> NBO analysis <sup>a</sup> of (CF <sup>3</sup> L2) <sub>2</sub> Zn with the M06-2X functional. ....             | 87  |
| <b>Table S65.</b> NBO analysis <sup>a</sup> of (CF <sup>3</sup> L2) <sub>2</sub> Zn with the CAM-B3LYP functional. ....          | 88  |
| <b>Table S66.</b> Solvated NBO analysis <sup>a</sup> of (CF <sup>3</sup> L2) <sub>2</sub> Zn with the M06-L functional. ....     | 89  |
| <b>Table S67.</b> Solvated NBO analysis <sup>a</sup> of (CF <sup>3</sup> L2) <sub>2</sub> Zn with the TPSSh functional. ....     | 90  |
| <b>Table S6.</b> Solvated NBO analysis <sup>a</sup> of (CF <sup>3</sup> L2) <sub>2</sub> Zn with the O3LYP functional. ....      | 91  |
| <b>Table S69.</b> Solvated NBO analysis <sup>a</sup> of (CF <sup>3</sup> L2) <sub>2</sub> Zn with the B3LYP functional. ....     | 92  |
| <b>Table S70.</b> Solvated NBO analysis <sup>a</sup> of (CF <sup>3</sup> L2) <sub>2</sub> Zn with the PBE0 functional. ....      | 93  |
| <b>Table S71.</b> Solvated NBO analysis <sup>a</sup> of (CF <sup>3</sup> L2) <sub>2</sub> Zn with the M06 functional. ....       | 94  |
| <b>Table S72.</b> Solvated NBO analysis <sup>a</sup> of (CF <sup>3</sup> L2) <sub>2</sub> Zn with the M06-2X functional. ....    | 95  |
| <b>Table S73.</b> Solvated NBO analysis <sup>a</sup> of (CF <sup>3</sup> L2) <sub>2</sub> Zn with the CAM-B3LYP functional. .... | 96  |
| <b>Table S74.</b> NBO analysis <sup>a</sup> of (tBuL3) <sub>2</sub> Zn with the M06-L functional. ....                           | 97  |
| <b>Table S75.</b> NBO analysis <sup>a</sup> of (tBuL3) <sub>2</sub> Zn with the TPSSh functional. ....                           | 98  |
| <b>Table S76.</b> NBO analysis <sup>a</sup> of (tBuL3) <sub>2</sub> Zn with the O3LYP functional. ....                           | 99  |
| <b>Table S77.</b> NBO analysis <sup>a</sup> of (tBuL3) <sub>2</sub> Zn with the B3LYP functional. ....                           | 100 |
| <b>Table S78.</b> NBO analysis <sup>a</sup> of (tBuL3) <sub>2</sub> Zn with the PBE0 functional. ....                            | 101 |
| <b>Table S79.</b> NBO analysis <sup>a</sup> of (tBuL3) <sub>2</sub> Zn with the M06 functional. ....                             | 102 |
| <b>Table S80.</b> NBO analysis <sup>a</sup> of (tBuL3) <sub>2</sub> Zn with the M06-2X functional. ....                          | 103 |
| <b>Table S81.</b> NBO analysis <sup>a</sup> of (tBuL3) <sub>2</sub> Zn with the CAM-B3LYP functional. ....                       | 104 |
| <b>Table S82.</b> Solvated NBO analysis <sup>a</sup> of (tBuL3) <sub>2</sub> Zn with the M06-L functional. ....                  | 105 |
| <b>Table S83.</b> Solvated NBO analysis <sup>a</sup> of (tBuL3) <sub>2</sub> Zn with the TPSSh functional. ....                  | 106 |
| <b>Table S84.</b> Solvated NBO analysis <sup>a</sup> of (tBuL3) <sub>2</sub> Zn with the O3LYP functional. ....                  | 107 |
| <b>Table S85.</b> Solvated NBO analysis <sup>a</sup> of (tBuL3) <sub>2</sub> Zn with the B3LYP functional. ....                  | 108 |
| <b>Table S86.</b> Solvated NBO analysis <sup>a</sup> of (tBuL3) <sub>2</sub> Zn with the PBE0 functional. ....                   | 109 |
| <b>Table S87.</b> Solvated NBO analysis <sup>a</sup> of (tBuL3) <sub>2</sub> Zn with the M06 functional. ....                    | 110 |
| <b>Table S88.</b> Solvated NBO analysis <sup>a</sup> of (tBuL3) <sub>2</sub> Zn with the M06-2X functional. ....                 | 111 |
| <b>Table S89.</b> Solvated NBO analysis <sup>a</sup> of (tBuL3) <sub>2</sub> Zn with the CAM-B3LYP functional. ....              | 112 |
| <b>Table S90.</b> NBO analysis <sup>a</sup> of (MeL3Me) <sub>2</sub> Zn with the M06-L functional. ....                          | 113 |
| <b>Table S91.</b> NBO analysis <sup>a</sup> of (MeL3Me) <sub>2</sub> Zn with the TPSSh functional. ....                          | 114 |
| <b>Table S92.</b> NBO analysis <sup>a</sup> of (MeL3Me) <sub>2</sub> Zn with the O3LYP functional. ....                          | 115 |

|                                                                                                                                                                                     |     |
|-------------------------------------------------------------------------------------------------------------------------------------------------------------------------------------|-----|
| <b>Table S93.</b> NBO analysis <sup>a</sup> of (MeL3Me) <sub>2</sub> Zn with the B3LYP functional.....                                                                              | 116 |
| <b>Table S94.</b> NBO analysis <sup>a</sup> of (MeL3Me) <sub>2</sub> Zn with the PBE0 functional. ....                                                                              | 117 |
| <b>Table S95.</b> NBO analysis <sup>a</sup> of (MeL3Me) <sub>2</sub> Zn with the M06 functional. ....                                                                               | 118 |
| <b>Table S96.</b> NBO analysis <sup>a</sup> of (MeL3Me) <sub>2</sub> Zn with the M06-2X functional. ....                                                                            | 119 |
| <b>Table S97.</b> NBO analysis <sup>a</sup> of (MeL3Me) <sub>2</sub> Zn with the CAM-B3LYP functional. ....                                                                         | 120 |
| <b>Table S98.</b> NBO analysis <sup>a</sup> of (CF <sub>3</sub> L4) <sub>2</sub> Zn with the M06-L functional. ....                                                                 | 121 |
| <b>Table S99.</b> NBO analysis <sup>a</sup> of (CF <sub>3</sub> L4) <sub>2</sub> Zn with the TPSSh functional. ....                                                                 | 122 |
| <b>Table S100.</b> NBO analysis <sup>a</sup> of (CF <sub>3</sub> L4) <sub>2</sub> Zn with the O3LYP functional. ....                                                                | 123 |
| <b>Table S101.</b> NBO analysis <sup>a</sup> of (CF <sub>3</sub> L4) <sub>2</sub> Zn with the B3LYP functional. ....                                                                | 124 |
| <b>Table S102.</b> NBO analysis <sup>a</sup> of (CF <sub>3</sub> L4) <sub>2</sub> Zn with the PBE0 functional. ....                                                                 | 125 |
| <b>Table S103.</b> NBO analysis <sup>a</sup> of (CF <sub>3</sub> L4) <sub>2</sub> Zn with the M06 functional. ....                                                                  | 126 |
| <b>Table S104.</b> NBO analysis <sup>a</sup> of (CF <sub>3</sub> L4) <sub>2</sub> Zn with the M06-2X functional. ....                                                               | 127 |
| <b>Table S105.</b> NBO analysis <sup>a</sup> of (CF <sub>3</sub> L4) <sub>2</sub> Zn with the CAM-B3LYP functional. ....                                                            | 128 |
| <b>Table S106.</b> NBO analysis <sup>a</sup> of (tBuL4) <sub>2</sub> Zn with the M06-L functional. ....                                                                             | 129 |
| <b>Table S107.</b> NBO analysis <sup>a</sup> of (tBuL4) <sub>2</sub> Zn with the TPSSh functional. ....                                                                             | 130 |
| <b>Table S108.</b> NBO analysis <sup>a</sup> of (tBuL4) <sub>2</sub> Zn with the O3LYP functional. ....                                                                             | 131 |
| <b>Table S109.</b> NBO analysis <sup>a</sup> of (tBuL4) <sub>2</sub> Zn with the B3LYP functional. ....                                                                             | 132 |
| <b>Table S110.</b> NBO analysis <sup>a</sup> of (tBuL4) <sub>2</sub> Zn with the PBE0 functional. ....                                                                              | 133 |
| <b>Table S111.</b> NBO analysis <sup>a</sup> of (tBuL4) <sub>2</sub> Zn with the M06 functional. ....                                                                               | 134 |
| <b>Table S112.</b> NBO analysis <sup>a</sup> of (tBuL4) <sub>2</sub> Zn with the M06-2X functional. ....                                                                            | 135 |
| <b>Table S113.</b> NBO analysis <sup>a</sup> of (tBuL4) <sub>2</sub> Zn with the CAM-B3LYP functional. ....                                                                         | 136 |
| <b>Table S114.</b> NBO analysis <sup>a</sup> of (MeL4) <sub>2</sub> Zn with the M06-L functional. ....                                                                              | 137 |
| <b>Table S115.</b> NBO analysis <sup>a</sup> of (MeL4) <sub>2</sub> Zn with the TPSSh functional. ....                                                                              | 138 |
| <b>Table S116.</b> NBO analysis <sup>a</sup> of (MeL4) <sub>2</sub> Zn with the O3LYP functional. ....                                                                              | 139 |
| <b>Table S117.</b> NBO analysis <sup>a</sup> of (MeL4) <sub>2</sub> Zn with the B3LYP functional. ....                                                                              | 140 |
| <b>Table S118.</b> NBO analysis <sup>a</sup> of (MeL4) <sub>2</sub> Zn with the PBE0 functional. ....                                                                               | 141 |
| <b>Table S119.</b> NBO analysis <sup>a</sup> of (MeL4) <sub>2</sub> Zn with the M06 functional. ....                                                                                | 142 |
| <b>Table S120.</b> NBO analysis <sup>a</sup> of (MeL4) <sub>2</sub> Zn with the M06-2X functional. ....                                                                             | 143 |
| <b>Table S121.</b> NBO analysis <sup>a</sup> of (MeL4) <sub>2</sub> Zn with the CAM-B3LYP functional. ....                                                                          | 144 |
| NMR spectra .....                                                                                                                                                                   | 145 |
| <b>Figure S28.</b> <sup>1</sup> H NMR (400 MHz, CDCl <sub>3</sub> , 22 °C) of (4-tetramethylguanidino)(2-trifluoromethyl)phenanthridine (CF <sub>3</sub> L1).....                   | 145 |
| <b>Figure S29.</b> <sup>19</sup> F{ <sup>1</sup> H} NMR (377 MHz, CDCl <sub>3</sub> , 22 °C) of (4-tetramethylguanidino)(2-trifluoromethyl)phenanthridine (CF <sub>3</sub> L1)..... | 145 |

|                                                                                                                                                                                                                      |     |
|----------------------------------------------------------------------------------------------------------------------------------------------------------------------------------------------------------------------|-----|
| <b>Figure S30.</b> $^{13}\text{C}$ NMR (101 MHz, $\text{CDCl}_3$ , 22 °C) of (4-tetramethylguanidino)(2-trifluoromethyl)phenanthridine ( $^{\text{CF}_3}\text{L1}$ ).....                                            | 146 |
| <b>Figure S31.</b> $^1\text{H}$ - $^{13}\text{C}$ HSQC NMR (101 MHz, $\text{CDCl}_3$ , 22 °C) of (4-tetramethylguanidino)(2-trifluoromethyl)phenanthridine ( $^{\text{CF}_3}\text{L1}$ ).....                        | 146 |
| <b>Figure S32.</b> $^1\text{H}$ - $^{13}\text{C}$ HMBC NMR (101 MHz, $\text{CDCl}_3$ , 22 °C) of (4-tetramethylguanidino)(2-trifluoromethyl)phenanthridine ( $^{\text{CF}_3}\text{L1}$ ).....                        | 147 |
| <b>Figure S33.</b> $^1\text{H}$ - $^1\text{H}$ COSY NMR (400 MHz, $\text{CDCl}_3$ , 22 °C) of (4-tetramethylguanidino)(2-trifluoromethyl)phenanthridine ( $^{\text{CF}_3}\text{L1}$ ).....                           | 147 |
| <b>Figure S34.</b> $^1\text{H}$ - $^1\text{H}$ NOESY NMR (400 MHz, $\text{CDCl}_3$ , 22 °C) of (4-tetramethylguanidino)(2-trifluoromethyl)phenanthridine ( $^{\text{CF}_3}\text{L1}$ ).....                          | 148 |
| <b>Figure S35.</b> $^1\text{H}$ NMR (400 MHz, $\text{CDCl}_3$ , 22 °C) of (2-tert-butyl)(4-tetramethylguanidino)phenanthridine ( $^{\text{tBu}}\text{L1}$ ).....                                                     | 148 |
| <b>Figure S36.</b> $^{13}\text{C}$ NMR (101 MHz, $\text{CDCl}_3$ , 22 °C) of (2-tert-butyl)(4-tetramethylguanidino)phenanthridine ( $^{\text{tBu}}\text{L1}$ ).....                                                  | 149 |
| <b>Figure S37.</b> $^1\text{H}$ - $^{13}\text{C}$ HSQC NMR (101 MHz, $\text{CDCl}_3$ , 22 °C) of (2-tert-butyl)(4-tetramethylguanidino)phenanthridine ( $^{\text{tBu}}\text{L1}$ ).....                              | 149 |
| <b>Figure S38.</b> $^1\text{H}$ - $^{13}\text{C}$ HMBC NMR (101 MHz, $\text{CDCl}_3$ , 22 °C) of (2-tert-butyl)(4-tetramethylguanidino)phenanthridine ( $^{\text{tBu}}\text{L1}$ ).....                              | 150 |
| <b>Figure S39.</b> $^1\text{H}$ - $^1\text{H}$ COSY NMR (400 MHz, $\text{CDCl}_3$ , 22 °C) of (2-tert-butyl)(4-tetramethylguanidino)phenanthridine ( $^{\text{tBu}}\text{L1}$ ).....                                 | 150 |
| <b>Figure S40.</b> $^1\text{H}$ - $^1\text{H}$ NOESY NMR (400 MHz, $\text{CDCl}_3$ , 22 °C) of (2-tert-butyl)(4-tetramethylguanidino)phenanthridine ( $^{\text{tBu}}\text{L1}$ ).....                                | 151 |
| <b>Figure S41.</b> $^1\text{H}$ NMR (500 MHz, $\text{CDCl}_3$ , 22 °C) of (4-aminopyrimidino)(2-trifluoromethyl)phenanthridine ( $^{\text{CF}_3}\text{L2}$ ).....                                                    | 151 |
| <b>Figure S42.</b> $^{19}\text{F}\{^1\text{H}\}$ NMR (471 MHz, $\text{CDCl}_3$ , 22 °C) of (4-aminopyrimidino)(2-trifluoromethyl)phenanthridine ( $^{\text{CF}_3}\text{L2}$ ).....                                   | 152 |
| <b>Figure S43.</b> $^{13}\text{C}$ NMR (126 MHz, $\text{CDCl}_3$ , 22 °C) of (4-aminopyrimidino)(2-trifluoromethyl)phenanthridine ( $^{\text{CF}_3}\text{L2}$ ).....                                                 | 152 |
| <b>Figure S44.</b> $^1\text{H}$ - $^{13}\text{C}$ HSQC NMR (126 MHz, $\text{CDCl}_3$ , 22 °C) of (4-aminopyrimidino)(2-trifluoromethyl)phenanthridine ( $^{\text{CF}_3}\text{L2}$ ).....                             | 153 |
| <b>Figure S45.</b> $^1\text{H}$ - $^{13}\text{C}$ HMBC NMR (126 MHz, $\text{CDCl}_3$ , 22 °C) of (4-aminopyrimidino)(2-trifluoromethyl)phenanthridine ( $^{\text{CF}_3}\text{L2}$ ).....                             | 153 |
| <b>Figure S46.</b> $^1\text{H}$ - $^1\text{H}$ COSY NMR (500 MHz, $\text{CDCl}_3$ , 22 °C) of (4-aminopyrimidino)(2-trifluoromethyl)phenanthridine ( $^{\text{CF}_3}\text{L2}$ ).....                                | 154 |
| <b>Figure S47.</b> $^1\text{H}$ - $^1\text{H}$ NOESY NMR (500 MHz, $\text{CDCl}_3$ , 22 °C) of (4-aminopyrimidino)(2-trifluoromethyl)phenanthridine ( $^{\text{CF}_3}\text{L2}$ ).....                               | 154 |
| <b>Figure S48.</b> $^1\text{H}$ NMR (400 MHz, $\text{CDCl}_3$ , 22 °C) of (4-tetramethylguanidino)(2-trifluoromethyl)phenanthridine zinc chloride ( $(^{\text{CF}_3}\text{L1})\text{ZnCl}_2$ ).....                  | 155 |
| <b>Figure S49.</b> $^{19}\text{F}\{^1\text{H}\}$ NMR (377 MHz, $\text{CDCl}_3$ , 22 °C) of (4-tetramethylguanidino)(2-trifluoromethyl)phenanthridine zinc chloride ( $(^{\text{CF}_3}\text{L1})\text{ZnCl}_2$ )..... | 155 |

|                                                                                                                                                                                                                                            |     |
|--------------------------------------------------------------------------------------------------------------------------------------------------------------------------------------------------------------------------------------------|-----|
| <b>Figure S50.</b> $^{13}\text{C}$ NMR (101 MHz, $\text{CDCl}_3$ , 22 °C) of (4-tetramethylguanidino)(2-trifluoromethyl)phenanthridine zinc chloride ( $(\text{CF}_3\text{L1})\text{ZnCl}_2$ ).....                                        | 156 |
| <b>Figure S51.</b> $^1\text{H}$ - $^{13}\text{C}$ HSQC NMR (101 MHz, $\text{CDCl}_3$ , 22 °C) of (4-tetramethylguanidino)(2-trifluoromethyl)phenanthridine zinc chloride ( $(\text{CF}_3\text{L1})\text{ZnCl}_2$ ).....                    | 156 |
| <b>Figure S52.</b> $^1\text{H}$ - $^{13}\text{C}$ HMBC NMR (101 MHz, $\text{CDCl}_3$ , 22 °C) of (4-tetramethylguanidino)(2-trifluoromethyl)phenanthridine zinc chloride ( $(\text{CF}_3\text{L1})\text{ZnCl}_2$ ).....                    | 157 |
| <b>Figure S53.</b> $^1\text{H}$ - $^1\text{H}$ COSY NMR (400 MHz, $\text{CDCl}_3$ , 22 °C) of (4-tetramethylguanidino)(2-trifluoromethyl)phenanthridine zinc chloride ( $(\text{CF}_3\text{L1})\text{ZnCl}_2$ ).....                       | 157 |
| <b>Figure S54.</b> $^1\text{H}$ - $^1\text{H}$ NOESY NMR (400 MHz, $\text{CDCl}_3$ , 22 °C) of (4-tetramethylguanidino)(2-trifluoromethyl)phenanthridine zinc chloride ( $(\text{CF}_3\text{L1})\text{ZnCl}_2$ ).....                      | 158 |
| <b>Figure S55.</b> $^1\text{H}$ NMR (400 MHz, $\text{CDCl}_3$ , 22 °C) of (2-tert-butyl)(4-tetramethylguanidino)phenanthridine zinc chloride ( $(t\text{BuL1})\text{ZnCl}_2$ ).....                                                        | 158 |
| <b>Figure S56.</b> $^{13}\text{C}$ NMR (101 MHz, $\text{CDCl}_3$ , 22 °C) of (2-tert-butyl)(4-tetramethylguanidino)phenanthridine zinc chloride ( $(t\text{BuL1})\text{ZnCl}_2$ ).....                                                     | 159 |
| <b>Figure S57.</b> $^1\text{H}$ - $^{13}\text{C}$ HSQC NMR (101 MHz, $\text{CDCl}_3$ , 22 °C) of (2-tert-butyl)(4-tetramethylguanidino)phenanthridine zinc chloride ( $(t\text{BuL1})\text{ZnCl}_2$ ).....                                 | 159 |
| <b>Figure S58.</b> $^1\text{H}$ - $^{13}\text{C}$ HMBC NMR (101 MHz, $\text{CDCl}_3$ , 22 °C) of (2-tert-butyl)(4-tetramethylguanidino)phenanthridine zinc chloride ( $(t\text{BuL1})\text{ZnCl}_2$ ).....                                 | 160 |
| <b>Figure S59.</b> $^1\text{H}$ - $^1\text{H}$ COSY NMR (400 MHz, $\text{CDCl}_3$ , 22 °C) of (2-tert-butyl)(4-tetramethylguanidino)phenanthridine zinc chloride ( $(t\text{BuL1})\text{ZnCl}_2$ ).....                                    | 160 |
| <b>Figure S60.</b> $^1\text{H}$ - $^1\text{H}$ NOESY NMR (400 MHz, $\text{CDCl}_3$ , 22 °C) of (2-tert-butyl)(4-tetramethylguanidino)phenanthridine zinc chloride ( $(t\text{BuL1})\text{ZnCl}_2$ ).....                                   | 161 |
| <b>Figure S61.</b> $^1\text{H}$ NMR (400 MHz, $\text{C}_6\text{D}_6$ , 22 °C) of bis-(4-aminopyrimidino)(2-trifluoromethyl)phenanthridine zinc ( $(\text{CF}_3\text{L2})_2\text{Zn}$ ). ....                                               | 161 |
| <b>Figure S62.</b> $^{19}\text{F}\{^1\text{H}\}$ NMR (377 MHz, $\text{C}_6\text{D}_6$ , 22 °C) of bis-(4-aminopyrimidino)(2-trifluoromethyl)phenanthridine zinc ( $(\text{CF}_3\text{L2})_2\text{Zn}$ ). ....                              | 162 |
| <b>Figure S63.</b> $^{13}\text{C}$ NMR (101 MHz, $\text{C}_6\text{D}_6$ , 22 °C) of bis-(4-aminopyrimidino)(2-trifluoromethyl)phenanthridine zinc ( $(\text{CF}_3\text{L2})_2\text{Zn}$ ). ....                                            | 162 |
| <b>Figure S64.</b> $^1\text{H}$ - $^{13}\text{C}$ HSQC NMR (101 MHz, $\text{CDCl}_3$ , 22 °C) of bis-(4-aminopyrimidino)(2-trifluoromethyl)phenanthridine zinc ( $(\text{CF}_3\text{L2})_2\text{Zn}$ ). ....                               | 163 |
| <b>Figure S65.</b> $^1\text{H}$ - $^{13}\text{C}$ HMBC NMR (101 MHz, $\text{CDCl}_3$ , 22 °C) of bis-(4-aminopyrimidino)(2-trifluoromethyl)phenanthridine zinc ( $(\text{CF}_3\text{L2})_2\text{Zn}$ ). ....                               | 163 |
| <b>Figure S66.</b> $^1\text{H}$ - $^1\text{H}$ COSY NMR (400 MHz, $\text{CDCl}_3$ , 22 °C) of bis-(4-aminopyrimidino)(2-trifluoromethyl)phenanthridine zinc ( $(\text{CF}_3\text{L2})_2\text{Zn}$ ). ....                                  | 164 |
| <b>Figure S67.</b> $^1\text{H}$ - $^1\text{H}$ NOESY NMR (400 MHz, $\text{CDCl}_3$ , 22 °C) of bis-(4-aminopyrimidino)(2-trifluoromethyl)phenanthridine zinc ( $(\text{CF}_3\text{L2})_2\text{Zn}$ ). ....                                 | 164 |
| <b>Figure S68.</b> Variable-temperature $^1\text{H}$ NMR (500 MHz, $\text{CDCl}_3$ ) of (4-tetramethylguanidino)(2-trifluoromethyl)phenanthridine zinc chloride (zoom of tetramethyl region) ( $(\text{CF}_3\text{L2})_2\text{Zn}$ ). .... | 165 |
| <b>Figure S69.</b> Variable-temperature $^1\text{H}$ NMR (500 MHz, $\text{CDCl}_3$ ) of (4-tetramethylguanidino)(2-trifluoromethyl)phenanthridine zinc chloride (full spectra) ( $(\text{CF}_3\text{L2})_2\text{Zn}$ ).....                | 165 |

|                                                                                                                                                                                                                                          |     |
|------------------------------------------------------------------------------------------------------------------------------------------------------------------------------------------------------------------------------------------|-----|
| <b>Figure S70.</b> Variable-temperature $^1\text{H}$ NMR (500 MHz, $\text{CDCl}_3$ ) of (2-tert-butyl)(4-tetramethylguanidino)phenanthridine zinc chloride (zoom of tetramethyl region) ( $(t^{\text{Bu}}\text{L1})\text{ZnCl}_2$ )..... | 166 |
| <b>Figure S71.</b> Variable-temperature $^1\text{H}$ NMR (500 MHz, $\text{CDCl}_3$ ) of (2-tert-butyl)(4-tetramethylguanidino)phenanthridine zinc chloride (full spectra) ( $(t^{\text{Bu}}\text{L1})\text{ZnCl}_2$ ). .....             | 166 |
| HRMS figures .....                                                                                                                                                                                                                       | 167 |
| <b>Figure S72.</b> APCI high-resolution mass spectrum of (4-tetramethylguanidino)(2-trifluoromethyl)phenanthridine ( $\text{CF}_3\text{L1}$ ).....                                                                                       | 167 |
| <b>Figure S73.</b> APCI high-resolution mass spectrum of (2-tert-butyl)(4-tetramethylguanidino)phenanthridine ( $t^{\text{Bu}}\text{L1}$ ).....                                                                                          | 167 |
| <b>Figure S74.</b> APCI high-resolution mass spectrum of (4-aminopyrimidino)(2-trifluoromethyl)phenanthridine ( $\text{CF}_3\text{L2}$ ).....                                                                                            | 168 |
| Coordinates of optimized geometries .....                                                                                                                                                                                                | 168 |
| References.....                                                                                                                                                                                                                          | 211 |

## Experimental Details

### General considerations

Air-sensitive manipulations were carried either in a N<sub>2</sub>-filled glovebox or using standard Schlenk techniques under Ar. Chloroformamidinium chloride,<sup>{Citation}</sup> (4-aminophenyl)(2-*tert*-butyl)phenanthridine (*<sup>t</sup>BuL3*)<sup>1</sup> and *bis*(4-aminophenyl)(2-*tert*-butyl)phenanthridine zinc(II) ((*<sup>t</sup>BuL3*)<sub>2</sub>Zn)<sup>1</sup> were synthesized according to literature procedure. Diethyl zinc (1.0 M in *n*-hexanes), tetramethyl urea (99 % purity), palladium(II) acetate (98 % purity), and DPEPhos (98 % purity) were purchased from Sigma Aldrich. Sodium hydroxide (97 % purity) and zinc dichloride (97 % purity) were purchased from Fisher Scientific. Oxalyl chloride (98 % purity) was purchased from Thermo Scientific. 2-bromopyrimidine (98 % purity) was purchased from Combi Blocks. Triethylamine (99 % purity) was purchased from Millipore. All other reagents and solvents were purchased from commercial suppliers and used without further purification. For moisture-sensitive manipulations, organic solvents were dried and distilled using appropriate drying agents. 1D and 2D NMR spectra were recorded on Bruker Avance 400 or 500 MHz spectrometers. <sup>1</sup>H and <sup>13</sup>C NMR spectra were referenced to residual solvent peaks. High resolution mass spectra (HRMS) were recorded using a Bruker microOTOF-QIII mass spectrometer.

Absorption spectra were measured on an Agilent Technologies Cary series UV-Vis-NIR spectrometer. Emission spectra in solution were measured using either a Photo Technology International Xenoflash fluorimeter or Jobin Yvon FluoroMax-2 spectrometer, in quartz cuvettes of 1 cm pathlength. Spectral data are corrected for the wavelength dependence of the detector, a Hamamatsu R928 photomultiplier tube (PMT). Fluorescence quantum yields in solution were measured using fluorescein in 0.1 M aqueous NaOH ( $\Phi = 0.90$ ) and cross-checked with aqueous [Ru(bpy)<sub>3</sub>]Cl<sub>2</sub> ( $\Phi = 0.04$ ). Fluorescence lifetimes were measured by time-correlated single-photon counting, following excitation at 405 nm with a pulsed laser diode. The emitted light was detected at 90° using an R928 PMT Peltier-cooled to –20°C, after passage through a monochromator. The estimated uncertainty in the lifetimes is  $\pm 10\%$  or better. The fluorescence spectra in the solid state were recorded using an integrating sphere attached to a Jobin Yvon Fluorolog instrument through optical fibres. Finely powdered samples were contained within Spectralon sample holders of 10 mm diameter. Quantum yields were determined using a sample of finely powdered BaSO<sub>4</sub> as a non-emissive blank.

### Preparation of (4-tetramethylguanidino)(2-trifluoromethyl)phenanthridine, <sup>CF3</sup>L1

A solution of 4-amino-2-(trifluoromethyl)phenanthridine (0.39 g, 1.5 mmol) in acetonitrile (10 mL) was added dropwise under positive pressure of argon to chloroformamidinium chloride (0.26 g, 1.5 mmol) in a Teflon-stoppered flask and stirred for ~ 5 min. Triethylamine (0.21 mL, 1.5 mmol) was then added also under positive pressure and the mixture was heated in an oil bath set to 80 °C for 16 h. The flask was then cooled to ambient temperature and an aqueous solution of NaOH (0.060 g, 1.5 mmol; 3 mL

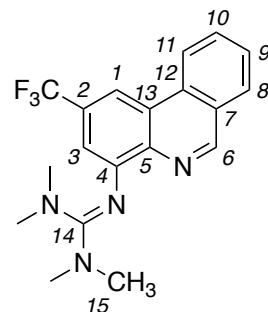

H<sub>2</sub>O) was added and allowed to stir for ~ 5 min. The volatiles were removed *in vacuo*. The organic product was then taken up in ethyl acetate and washed with distilled water (3x 70 mL), stirred over Na<sub>2</sub>SO<sub>4</sub> (10 g), and dried *in vacuo* to leave a tacky dark brown solid. Isolated yield: 0.47 g (87 %). <sup>1</sup>H NMR (CDCl<sub>3</sub>, 400 MHz, 22 °C): δ 9.26 (s, 1H; C<sub>6</sub>H), 8.56 (d, <sup>3</sup>J<sub>HH</sub> = 8.3 Hz, 1H; C<sub>11</sub>H), 8.26 (s, 1H; C<sub>1</sub>H), 7.99 (d, <sup>3</sup>J<sub>HH</sub> = 6.6 Hz, 1H; C<sub>8</sub>H), 7.81 (ddd, <sup>3</sup>J<sub>HH</sub> = 8.4, 7.1 Hz; <sup>4</sup>J<sub>HH</sub> = 1.5 Hz, 1H; C<sub>9</sub>H), 7.67 (ddd, <sup>3</sup>J<sub>HH</sub> = 7.4, 7.2 Hz; <sup>3</sup>J<sub>HH</sub> = 1.0 Hz, 1H; C<sub>10</sub>H), 7.10 (s, 1H; C<sub>3</sub>H), 2.73 ppm (s, 12H; C<sub>15</sub>H<sub>3</sub>). <sup>13</sup>C{<sup>1</sup>H} NMR (CDCl<sub>3</sub>, 101 MHz, 22 °C): δ 162.4 (C<sub>14</sub>), 153.1 (C<sub>6</sub>), 151.9 (C<sub>12</sub>), 139.6 (C<sub>4</sub>), 133.0 (C<sub>13</sub>), 131.0 (C<sub>11</sub>), 129.1 (q, <sup>2</sup>J<sub>CF</sub> = 31.4 Hz, C<sub>2</sub>), 128.7 (C<sub>8</sub>), 127.8 (C<sub>10</sub>), 126.6 (C<sub>5</sub>), 124.7 (q, <sup>1</sup>J<sub>CF</sub> = 273 Hz, C<sub>CF3</sub>), 124.7 (C<sub>7</sub>), 122.4 (C<sub>11</sub>), 115.5 (q, <sup>3</sup>J<sub>CF</sub> = 3 Hz; C<sub>3</sub>), 110.1 (q, <sup>3</sup>J<sub>CF</sub> = 4 Hz; C<sub>1</sub>), 39.7 ppm (C<sub>15</sub>). <sup>19</sup>F{<sup>1</sup>H} NMR (CDCl<sub>3</sub>, 377 MHz, 22 °C): -62.1 ppm (F<sub>CF3</sub>). HR-MS (APCI/MS, m/z) calculated for M+H<sup>+</sup> (M = C<sub>19</sub>H<sub>19</sub>F<sub>3</sub>N<sub>4</sub>) 361.1635; found 361.1657.

### Preparation of (2-tert-butyl)(4-tetramethylguanidino)phenanthridine, <sup>tBu</sup>L1

A suspension of 4-amino-2-(*tert*-butyl)phenanthridine (0.37 g, 1.5 mmol) in acetonitrile (15 mL) was added dropwise under positive pressure of argon to a Teflon-stoppered flask charged with chloroformamidinium chloride (0.26 g, 1.5 mmol) and stirred for ~ 5 min. Triethylamine (0.21 mL, 2.5 mmol) was then added under positive pressure of argon and the mixture was heated in an oil bath set to 80 °C

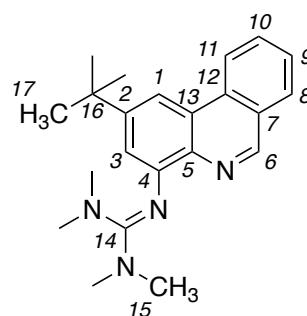

for 16 h. The flask was then cooled to ambient temperature and an aqueous solution of NaOH (0.060 g, 1.5 mmol; 3 mL H<sub>2</sub>O) was added and allowed to stir for ~ 5 min. The volatiles were removed *in vacuo*, and the organic product was then taken up in ethyl acetate and washed with distilled water (3x 70 mL), stirred over Na<sub>2</sub>SO<sub>4</sub> (10 g), and dried *in vacuo* to leave a dark brown

powder. Isolated yield: 0.45 g (89 %).  $^1\text{H}$  NMR ( $\text{CDCl}_3$ , 400 MHz, 22 °C):  $\delta$  9.12 (s, 1H;  $\text{C}_6\text{H}$ ), 8.60 (d,  $^3J_{\text{HH}} = 8.3$  Hz, 1H;  $\text{C}_{11}\text{H}$ ), 8.09 (s, 1H;  $\text{C}_1\text{H}$ ), 7.94 (d,  $^3J_{\text{HH}} = 7.9$  Hz, 1H;  $\text{C}_8\text{H}$ ), 7.76 (ddd,  $^3J_{\text{HH}} = 8.4$ , 7.0 Hz;  $^4J_{\text{HH}} = 1.4$  Hz, 1H;  $\text{C}_9\text{H}$ ), 7.60 (ddd,  $^3J_{\text{HH}} = 7.4$ , 7.2 Hz;  $^4J_{\text{HH}} = 1.0$  Hz, 1H;  $\text{C}_{10}\text{H}$ ), 7.22 (s, 1H;  $\text{C}_3\text{H}$ ), 2.74 (s, 12H;  $\text{C}_{15}\text{H}_3$ ), 1.44 ppm (s, 9H,  $\text{C}_{17}\text{H}_3$ ).  $^{13}\text{C}\{^1\text{H}\}$  NMR ( $\text{CDCl}_3$ , 101 MHz, 22 °C):  $\delta$  161.81 ( $\text{C}_{14}$ ), 150.8 ( $\text{C}_6$ ), 150.5 ( $\text{C}_2$ ), 136.5 ( $\text{C}_4$ ), 133.2 ( $\text{C}_{13}$ ), 130.2 ( $\text{C}_9$ ), 128.5 ( $\text{C}_8$ ), 126.8 ( $\text{C}_{10}$ ), 126.6 ( $\text{C}_5$ ), 124.1 ( $\text{C}_7$ ), 122.2 ( $\text{C}_{11}$ ), 119.2 ( $\text{C}_3$ ), 110.2 ( $\text{C}_1$ ), 39.7 ( $\text{C}_{15}$ ), 35.1 ( $\text{C}_{16}$ ), 31.6 ( $\text{C}_{17}$ ) ppm. Not observed:  $\text{C}_{12}$ . HR-MS (APCI/MS,  $m/z$ ) calculated for  $\text{M}+\text{H}^+$  ( $\text{M} = \text{C}_{22}\text{H}_{28}\text{N}_4$ ) 349.2387; found 349.2349.

### Preparation of (4-aminopyrimidino)(2-trifluoromethyl)phenanthridine, $\text{CF}_3\text{L2}$

$\text{Pd}(\text{OAc})_2$  (0.017 g, 0.075 mmol) and DPEPhos (0.083 g, 0.15 mmol) were combined with dry toluene (10 mL) in a Teflon-stoppered flask and stirred for ~ 5 min. Under positive pressure of argon, 2-Bromopyrimidine (0.12 g, 0.75 mmol) was added, followed by 4-amino-2-(trifluoromethyl)phenanthridine (0.20 g, 0.75 mmol) and  $\text{Cs}_2\text{CO}_3$  (0.29 g, 0.90 mmol), with brief stirring (~ 5 min) following each addition. The mixture was then heated in an oil bath set to 130 °C. After 16 h, the mixture was cooled to room temperature, filtered over celite, and the solvents removed *in vacuo*. The residue was taken up in methanol and filtered, and the precipitate was washed thoroughly with methanol, leaving a purple-brown solid. Isolated yield: 0.11 g (42%).  $^1\text{H}$  NMR ( $\text{CDCl}_3$ , 500 MHz, 22 °C):  $\delta$  10.00 (s, 1H; NH), 9.22 (overlapped s, 2H;  $\text{C}_1\text{H}$ ,  $\text{C}_6\text{H}$ ), 8.57 (d,  $^3J_{\text{HH}} = 4.9$  Hz, 2H;  $\text{C}_{15}\text{H}_2$ ), 8.55 (d,  $^3J_{\text{HH}} = 8.1$  Hz, 1H;  $\text{C}_{11}\text{H}$ ), 8.33 (s, 1H;  $\text{C}_3\text{H}$ ), 8.06 (d,  $^3J_{\text{HH}} = 7.9$  Hz, 1H;  $\text{C}_8\text{H}$ ), 7.87 (ddd,  $^3J_{\text{HH}} = 8.4$ , 7.0 Hz;  $^4J_{\text{HH}} = 1.4$  Hz, 1H;  $\text{C}_{10}\text{H}$ ), 7.72 (ddd,  $^3J_{\text{HH}} = 7.9$ , 7.0 Hz;  $^4J_{\text{HH}} = 1.1$  Hz, 1H;  $\text{C}_9\text{H}$ ), 6.84 (t,  $^3J_{\text{HH}} = 4.8$  Hz, 1H;  $\text{C}_{16}\text{H}$ ).  $^{13}\text{C}\{^1\text{H}\}$  NMR ( $\text{CDCl}_3$ , 126 MHz, 22 °C):  $\delta$  159.7 ( $\text{C}_{14}$ ), 158.1 ( $\text{C}_{15}$ ), 152.7 ( $\text{C}_6$ ), 137.8 ( $\text{C}_{12}$ ), 134.7 ( $\text{C}_4$ ), 132.6 ( $\text{C}_{13}$ ), 131.7 ( $\text{C}_{10}$ ), 129.3 (q,  $^2J_{\text{CF}} = 32$  Hz;  $\text{C}_2$ ), 129.1 ( $\text{C}_8$ ), 128.3 ( $\text{C}_9$ ), 126.8 ( $\text{C}_7$ ), 124.6 (q,  $^1J_{\text{CF}} = 273$  Hz;  $\text{C}_{\text{CF}_3}$ ), 123.5 ( $\text{C}_5$ ), 122.3 ( $\text{C}_{11}$ ), 113.4 ( $\text{C}_{16}$ ), 111.2 (q,  $^3J_{\text{CF}} = 5$  Hz;  $\text{C}_3$ ), 110.6 ppm (q,  $^3J_{\text{CF}} = 4$  Hz;  $\text{C}_1$ ).  $^{19}\text{F}\{^1\text{H}\}$  NMR ( $\text{CDCl}_3$ , 471 MHz, 22 °C): -62.0 ppm ( $F_{\text{CF}_3}$ ). HR-MS (APCI/MS,  $m/z$ ) calculated for  $\text{M}+\text{H}^+$  ( $\text{M} = \text{C}_{18}\text{H}_{11}\text{F}_3\text{N}_4$ ) 341.1009; found 341.1025.

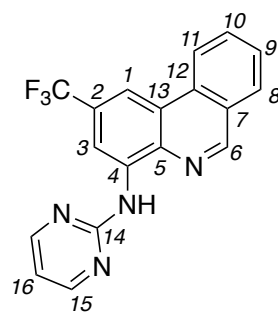

**Preparation of (4-tetramethylguanidino)(2-trifluoromethyl)phenanthridine zinc chloride, (<sup>CF3</sup>L1)ZnCl<sub>2</sub>**

A solution of (4-tetramethylguanidino)(2-trifluoromethyl)phenanthridine (0.14 g, 0.39 mmol) in dichloromethane (10 mL) was added to a stirring solution of ZnCl<sub>2</sub> (0.047 g, 0.35 mmol) in methanol (10 mL) in a round bottom flask, and continued to stir at room temperature for 16 h. The solvents were then evaporated *in vacuo* and the residue taken up in methanol and filtered. The precipitate was washed thoroughly with methanol, leaving a bright yellow-green solid. Isolated yield: 0.091 g (46 %). <sup>1</sup>H NMR (CDCl<sub>3</sub>, 400

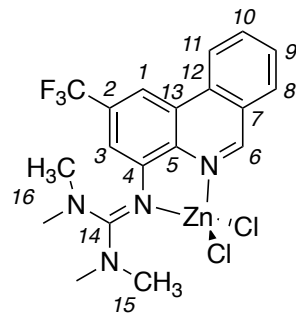

MHz, 22 °C): δ 9.39 (s, 1H; C<sub>6</sub>H), 8.66 (d, <sup>3</sup>J<sub>HH</sub> = 8.3 Hz, 1H; C<sub>11</sub>H), 8.38 (s, 1H; C<sub>1</sub>H), 8.21 (d, <sup>3</sup>J<sub>HH</sub> = 8.0 Hz, 1H; C<sub>8</sub>H), 8.07 (ddd, <sup>3</sup>J<sub>HH</sub> = 8.5, 7.1 Hz; <sup>4</sup>J<sub>HH</sub> = 1.4 Hz, 1H; C<sub>9</sub>H), 7.88 (ddd, <sup>3</sup>J<sub>HH</sub> = 8.1, 7.2 Hz; <sup>4</sup>J<sub>HH</sub> = 0.8 Hz, 1H; C<sub>10</sub>H), 6.99 (s, 1H; C<sub>3</sub>H), 3.11 (s, 6H; C<sub>15</sub>H<sub>3</sub>), 2.93 ppm (s, 6H; C<sub>16</sub>H<sub>3</sub>). <sup>13</sup>C{<sup>1</sup>H} NMR (CDCl<sub>3</sub>, 101 MHz, 22 °C): δ 165.6 (C<sub>14</sub>), 154.8 (C<sub>6</sub>), 145.3 (C<sub>12</sub>), 135.4 (C<sub>13</sub>), 134.4 (C<sub>9</sub>), 133.8 (C<sub>4</sub>), 130.8 (q, <sup>2</sup>J<sub>CF</sub> = 32.7 Hz; C<sub>2</sub>), 130.7 (C<sub>8</sub>), 129.7 (C<sub>10</sub>), 126.6 (C<sub>5</sub>), 125.7 (C<sub>7</sub>), 124.0 (q, <sup>1</sup>J<sub>CF</sub> = 276 Hz; C<sub>CF3</sub>), 122.7 (C<sub>11</sub>), 112.8 (q, <sup>3</sup>J<sub>CF</sub> = 3 Hz; C<sub>3</sub>), 111.7 (q, <sup>3</sup>J<sub>CF</sub> = 4 Hz; C<sub>1</sub>), 41.1 (C<sub>15</sub>), 40.5 ppm (C<sub>16</sub>). <sup>19</sup>F{<sup>1</sup>H} NMR (CDCl<sub>3</sub>, 377 MHz, 22 °C): -62.5 ppm (F<sub>CF3</sub>).

**Preparation of (2-*tert*-butyl)(4-tetramethylguanidino)phenanthridine zinc chloride, (<sup>tBu</sup>L1)ZnCl<sub>2</sub>**

A solution of (2-*tert*-butyl)(4-tetramethylguanidino)phenanthridine (0.11 g, 0.32 mmol) in dichloromethane (10 mL) was added to a stirring solution of ZnCl<sub>2</sub> (0.040 g, 0.29 mmol) in methanol (10 mL) in a round bottom flask, with stirring then continued at room temperature for 16 h. The solvents were next evaporated *in vacuo* and the residue taken up in methanol and filtered. The precipitate was washed thoroughly with methanol, leaving a bright green solid. Isolated yield: 0.79 g (56 %). <sup>1</sup>H NMR (CDCl<sub>3</sub>, 400 MHz,

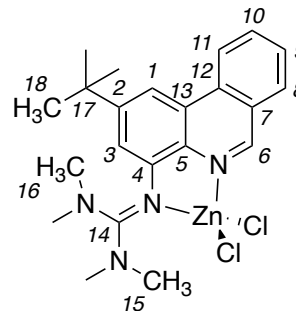

22 °C): δ 9.23 (s, 1H; C<sub>6</sub>H), 8.66 (d, <sup>3</sup>J<sub>HH</sub> = 8.1 Hz, 1H; C<sub>11</sub>H), 8.14 (d, <sup>3</sup>J<sub>HH</sub> = 1.9 Hz, 1H; C<sub>1</sub>H), 8.12 (d, <sup>3</sup>J<sub>HH</sub> = 8.0 Hz, 1H; C<sub>8</sub>H), 7.98 (ddd, <sup>3</sup>J<sub>HH</sub> = 8.5, 7.1 Hz; <sup>4</sup>J<sub>HH</sub> = 1.4 Hz, 1H; C<sub>9</sub>H), 7.78 (ddd, <sup>3</sup>J<sub>HH</sub> = 8.0, 7.1 Hz; <sup>4</sup>J<sub>HH</sub> = 1.1 Hz, 1H; C<sub>10</sub>H), 6.96 (s, 1H; C<sub>3</sub>H), 3.08 (s, 6H; C<sub>15</sub>H<sub>3</sub>), 2.39 (s, 6H; C<sub>16</sub>H<sub>3</sub>), 1.47 ppm (s, 9H, C<sub>18</sub>H<sub>3</sub>). <sup>13</sup>C{<sup>1</sup>H} NMR (CDCl<sub>3</sub>, 101 MHz, 22 °C): δ 165.5 (C<sub>14</sub>), 152.2 (C<sub>6</sub>), 152.0 (C<sub>2</sub>), 143.6 (C<sub>12</sub>), 133.7 (C<sub>4</sub>), 133.2 (C<sub>9</sub>), 132.8 (C<sub>13</sub>), 130.4 (C<sub>8</sub>), 128.6 (C<sub>10</sub>), 126.5 (C<sub>5</sub>), 125.3 (C<sub>7</sub>), 122.5 (C<sub>11</sub>), 116.0 (C<sub>3</sub>), 110.0 (C<sub>1</sub>), 40.9 (C<sub>15</sub>), 40.3 (C<sub>16</sub>), 35.5 (C<sub>17</sub>), 31.6 (C<sub>18</sub>) ppm.

### Preparation of *bis*(4-aminopyrimidino)(2-trifluoromethyl)phenanthridine zinc, $(\text{CF}_3\text{L2})_2\text{Zn}$

In a glovebox of  $\text{N}_2$  atmosphere, a solution of (4-aminopyrimidino)(2-trifluoromethyl)phenanthridine (0.025 g, 0.073 mmol) in benzene- $\text{d}_6$  (1 mL) was cooled to  $-18^\circ\text{C}$ . Diethylzinc (0.038 mL, 0.035 mmol) was then added to the frozen solution and the mixture allowed to warm to room temperature. Upon thawing, the solution was transferred to an NMR tube, and immediately following NMR analysis of the reactive compound, the solvent was evaporated *in vacuo*, revealing a bright yellow solid.

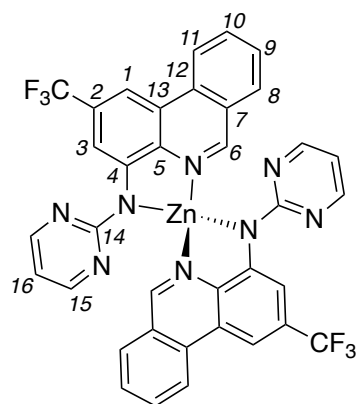

NMR showed that reaction conversion was quantitative ( $> 95\%$ ). Note: this compound is susceptible to proto-deligation and decomposes in the presence of protic solvents/impurities, including chloroform.  $^1\text{H}$  NMR ( $\text{C}_6\text{D}_6$ , 500 MHz,  $22^\circ\text{C}$ ):  $\delta$  10.58 (s, 1H;  $\text{C}_1\text{H}_2$ ), 8.55 (s, 1H;  $\text{C}_6\text{H}_2$ ), 8.11 (s, 1H;  $\text{C}_3\text{H}_2$ ), 8.05 (d,  $^3J_{\text{HH}} = 4.7$  Hz, 2H;  $\text{C}_{15}\text{H}_4$ ), 7.81 (d,  $^3J_{\text{HH}} = 8.7$  Hz, 1H;  $\text{C}_8\text{H}_2$ ), 7.17 (d,  $^3J_{\text{HH}} = 7.5$  Hz, 1H;  $\text{C}_{11}\text{H}_2$ ), 6.94 (ddd,  $^3J_{\text{HH}} = 8.1$ , 6.9 Hz;  $^4J_{\text{HH}} = 0.8$  Hz, 1H;  $\text{C}_{10}\text{H}_2$ ), 6.90 (d,  $^3J_{\text{HH}} = 7.9$  Hz, 1H;  $\text{C}_9\text{H}_2$ ), 5.84 (t,  $^3J_{\text{HH}} = 4.6$  Hz, 1H;  $\text{C}_{16}\text{H}_2$ ).  $^{13}\text{C}\{^1\text{H}\}$  NMR ( $\text{C}_6\text{D}_6$ , 126 MHz,  $22^\circ\text{C}$ ):  $\delta$  165.8 ( $\text{C}_{14}$ ), 158.1 ( $\text{C}_{15}$ ), 151.3 ( $\text{C}_6$ ), 146.5 ( $\text{C}_{13}$ ), 136.5 ( $\text{C}_5$ ), 134.2 ( $\text{C}_7$ ), 132.7 ( $\text{C}_{11}$ ), 132.0 ( $\text{C}_{12}$ ), 131.7 ( $\text{C}_4$ ), 129.6 ( $\text{C}_9$ ), 127.7 ( $\text{C}_{10}$ ), 125.8 (q,  $^2J_{\text{CF}} = 103$  Hz;  $\text{C}_2$ ), 122.7 ( $\text{C}_8$ ), 113.7 (q,  $^3J_{\text{CF}} = 4$  Hz;  $\text{C}_1$ ), 110.8 ( $\text{C}_{16}$ ), 107.3 ppm (q,  $^3J_{\text{CF}} = 3$  Hz;  $\text{C}_3$ ). Not observed:  $\text{C}_{\text{CF}_3}$ .  $^{19}\text{F}\{^1\text{H}\}$  NMR ( $\text{CDCl}_3$ , 471 MHz,  $22^\circ\text{C}$ ): -61.8 ppm ( $F_{\text{CF}_3}$ ).

### X-ray crystallography

Single crystals of each compound were selected using an optical microscope and were mounted on MiTeGen loops. Data collection was carried out using the Bruker D8 QUEST ECO diffractometer and Bruker APEX4 software.<sup>2</sup> Structure solution was performed using XS, XT, and XL<sup>3</sup> embedded in Olex2.<sup>4</sup> Mercury was used to visualize solid-state structures.<sup>5</sup> Details of growth, data collection, solution, and refinement specific to each crystal are given below.

### Crystal structure of $(\text{CF}_3\text{L1})\text{ZnCl}_2$ (CCDC 2320600)

X-ray quality crystals of yellow, plate-like habit were obtained through slow cooling ( $60^\circ\text{C}$  to  $22^\circ\text{C}$ ) and slow evaporation of a saturated solution of  $(\text{CF}_3\text{L1})\text{ZnCl}_2$  in 3:1 methanol:water. The data collection was performed under a cold stream of nitrogen (150 K). Crystal structure parameters:

C<sub>19</sub>H<sub>19</sub>Cl<sub>2</sub>F<sub>3</sub>N<sub>4</sub>Zn (248.34 g/mol): monoclinic, space group *C2/c*, *a* = 31.5266(16) Å, *b* = 16.1610(8) Å, *c* = 13.1152(6) Å,  $\beta$  = 114.276(2)°, *V* = 6091.3(5) Å<sup>3</sup>, *Z* = 16; crystal dimensions 0.39 x 0.21 x 0.05 mm; diffractometer Bruker D8 QUEST ECO CMOS, Mo K $\alpha$  radiation,  $2\theta$  = 2.45 to 26.53°, 55874 reflections measured, 6320 unique (*R*<sub>int</sub> = 0.0684, *R*<sub>sigma</sub> = 0.0343) which were used in all calculations, intrinsic phasing;  $\mu$ (MoK $\alpha$ ) = 1.009 mm<sup>-1</sup>, absorption correction semiempirical (multi-scan); refinement with olex2.refine 1.5, 294 parameters, 73 restraints, the final *R*<sub>1</sub> was 0.0406 (*I* > 2 $\sigma$ (*I*)) and *wR*<sub>2</sub> was 0.0984 (all data), GooF = 1.0331, residual electron density 0.54 Å<sup>-3</sup>.

### Crystal structure of (CF<sub>3</sub>L2)<sub>2</sub>Zn (CCDC 2320601)

X-ray quality crystals of yellow, block-habit were obtained through layering dry hexanes over a solution of (CF<sub>3</sub>L2)<sub>2</sub>Zn in tetrahydrofuran in a glovebox of N<sub>2</sub> atmosphere. The data collection was performed under a cold stream of nitrogen (168 K). Crystal structure parameters C<sub>36</sub>H<sub>20</sub>F<sub>6</sub>N<sub>8</sub>Zn, C<sub>4</sub>H<sub>8</sub>O (*M* = 816.07 g/mol): monoclinic, space group *C2/c*, *a* = 22.2606(14) Å, *b* = 21.5288(14) Å, *c* = 10.5400(7) Å,  $\beta$  = 115.087(2)°, *V* = 4574.7(5) Å<sup>3</sup>, *Z* = 4; crystal dimensions 0.22 x 0.2 x 0.09 mm; diffractometer Bruker D8 QUEST ECO CMOS, Mo K $\alpha$  radiation,  $2\theta$  = 2.77 to 24.79°, 50165 reflections measured, 3912 unique (*R*<sub>int</sub> = 0.0594, *R*<sub>sigma</sub> = 0.0249) which were used in all calculations, intrinsic phasing;  $\mu$ (MoK $\alpha$ ) = 0.598 mm<sup>-1</sup>, absorption correction semiempirical (multi-scan); refinement with SHELXL, 276 parameters, 75 restraints, the final *R*<sub>1</sub> was 0.0514 (*I* > 2 $\sigma$ (*I*)) and *wR*<sub>2</sub> was 0.1537 (all data), GooF = 1.080, residual electron density 0.71 Å<sup>-3</sup>.

### Computational Modelling

All calculations were carried out on Orca v.5.0.1.<sup>6,7</sup> within the framework of Kohn-Sham density functional theory (KS-DFT); restricted and unrestricted KS were used for closed-shell and open-shell calculations, respectively. Solvent effects were accounted for implicitly using the SMD solvent model.<sup>8</sup> Furthermore, we used the resolution-of-identity approximation to speed up all our calculations. Note that for the hybrid and range-separated functionals used in this study, we used the resolution-of-identity ‘chains of spheres’ approximation (RIJCOSX). Additional auxiliary basis sets were therefore used (def2/J). The ground state geometries of the complexes were

optimized at the M06-L/def2-SVP and B3LYP/def2-SVP level of theories in the gas phase and in CH<sub>2</sub>Cl<sub>2</sub>. The coordinates from the crystal structures of the complexes were used as initial inputs for the optimization. Subsequent frequency analyses on the optimized geometries did not show any imaginary frequencies indicating the structures are minima on the ground state potential energy surface. A comparison of the solid-state vs computationally optimized bond lengths and angles can be found in Tables S1-S3.

We then carried out natural bond orbital (NBO) analyses on the complexes using the NBO 7.0 program<sup>9</sup> to interrogate the bonding around the amido/imino nitrogen donors. Here, we used the geometries obtained using M06-L/def2-SVP both in the gas phase and in solution. We varied the amount of Hartree-Fock exchange to understand its impact on the bonding character. The following functionals were used M06-L (0%),<sup>10</sup> TPSSh (10%),<sup>11</sup> O3LYP (11.16%),<sup>12</sup> B3LYP (20%),<sup>13</sup> PBE0 (25%),<sup>14</sup> M06 (27%),<sup>10</sup> M06-2X (54%),<sup>10</sup> and CAM-B3LYP (range-separated; HF% is variational).<sup>15</sup> A larger basis set was also implemented, using the triple-zeta and doubly polarized def2-TZVPP basis set. A summary of the NBO results can be found in Figures S25 and S26, and a collection of the relevant NBO raw output data can be found in Tables S33-S120.

For the excited states, we used the B3LYP/def2-SVP level of theory to optimize the excited S<sub>1</sub> and T<sub>1</sub> states in CH<sub>2</sub>Cl<sub>2</sub>. We additionally optimized the geometries in Et<sub>2</sub>O, toluene and *n*-hexane. Time-dependent DFT (TD-DFT) was used to optimize the S<sub>1</sub> state. Similarly, frequency analyses did not reveal any imaginary frequencies. We further performed TD-DFT on the ground state geometries to simulate the optical spectra of the complexes in the four solvents used in this study. The simulated optical spectra were generated using Multiwfn version 3.7<sup>16</sup> applying 0.35 eV broadening (Figures S14, S16, and S19). Ground state molecular orbital isosurfaces were generated on Avogadro with isovalue of 0.04. The electron-hole density maps were obtained from the changes in the electron densities obtained from the TDDFT calculations. To do this, we first generated molden files using the orca\_2mkl module, which were subsequently fed into Multiwfn v.3.7. After choosing the electronic excitation of interest, we then created cube files that were opened on VESTA 3.5.8 to plot the relevant electron-hole density maps (isovalue = 0.001). Spin density maps were generated using the orca\_plot module and visualized using Gabedit.<sup>17</sup> Orbital composition analysis (Hirshfeld method)<sup>18</sup> and fragment contribution analysis were done using Multiwfn version 3.7.<sup>16</sup> Mercury was used to visualize S<sub>0</sub>, S<sub>1</sub>, and T<sub>1</sub> states.<sup>5</sup>

## Electronic Absorption and Emission Spectroscopy Figures

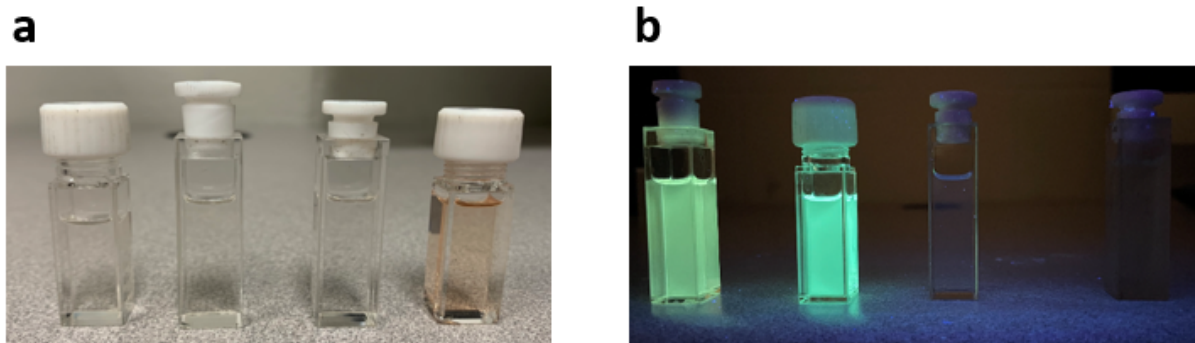

**Figure S1.** Equimolar solutions (approx. 0.10 mM) of proligands (a) in ambient light and (b) under UV irradiation (355 nm). For each image, from left to right:  $t\text{BuL1}$ ,  $\text{CF}_3\text{L1}$ ,  $\text{CF}_3\text{L2}$ ,  $t\text{BuL3}$ .

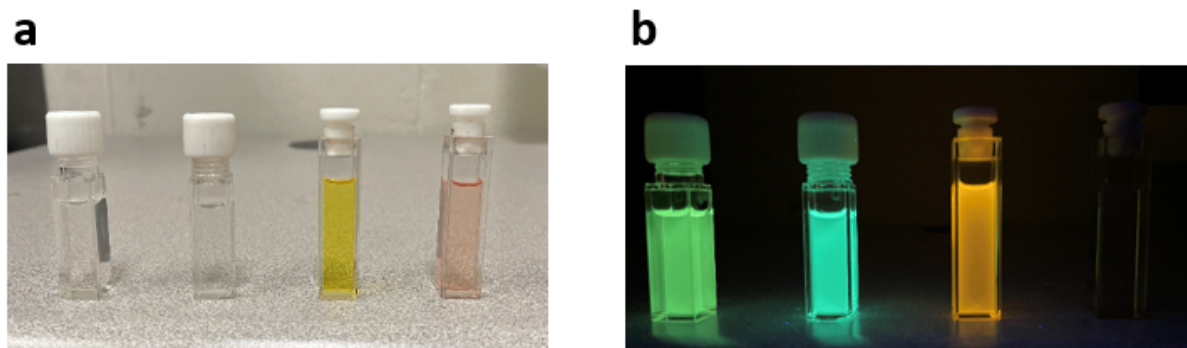

**Figure S2.** Equimolar solutions (approx. 0.10 mM) of complexes (a) in ambient light and (b) under UV irradiation (355 nm). For each image, from left to right:  $(t\text{BuL1})\text{ZnCl}_2$ ,  $(\text{CF}_3\text{L1})\text{ZnCl}_2$ ,  $(\text{CF}_3\text{L2})_2\text{Zn}$ ,  $(t\text{BuL3})_2\text{Zn}$ .

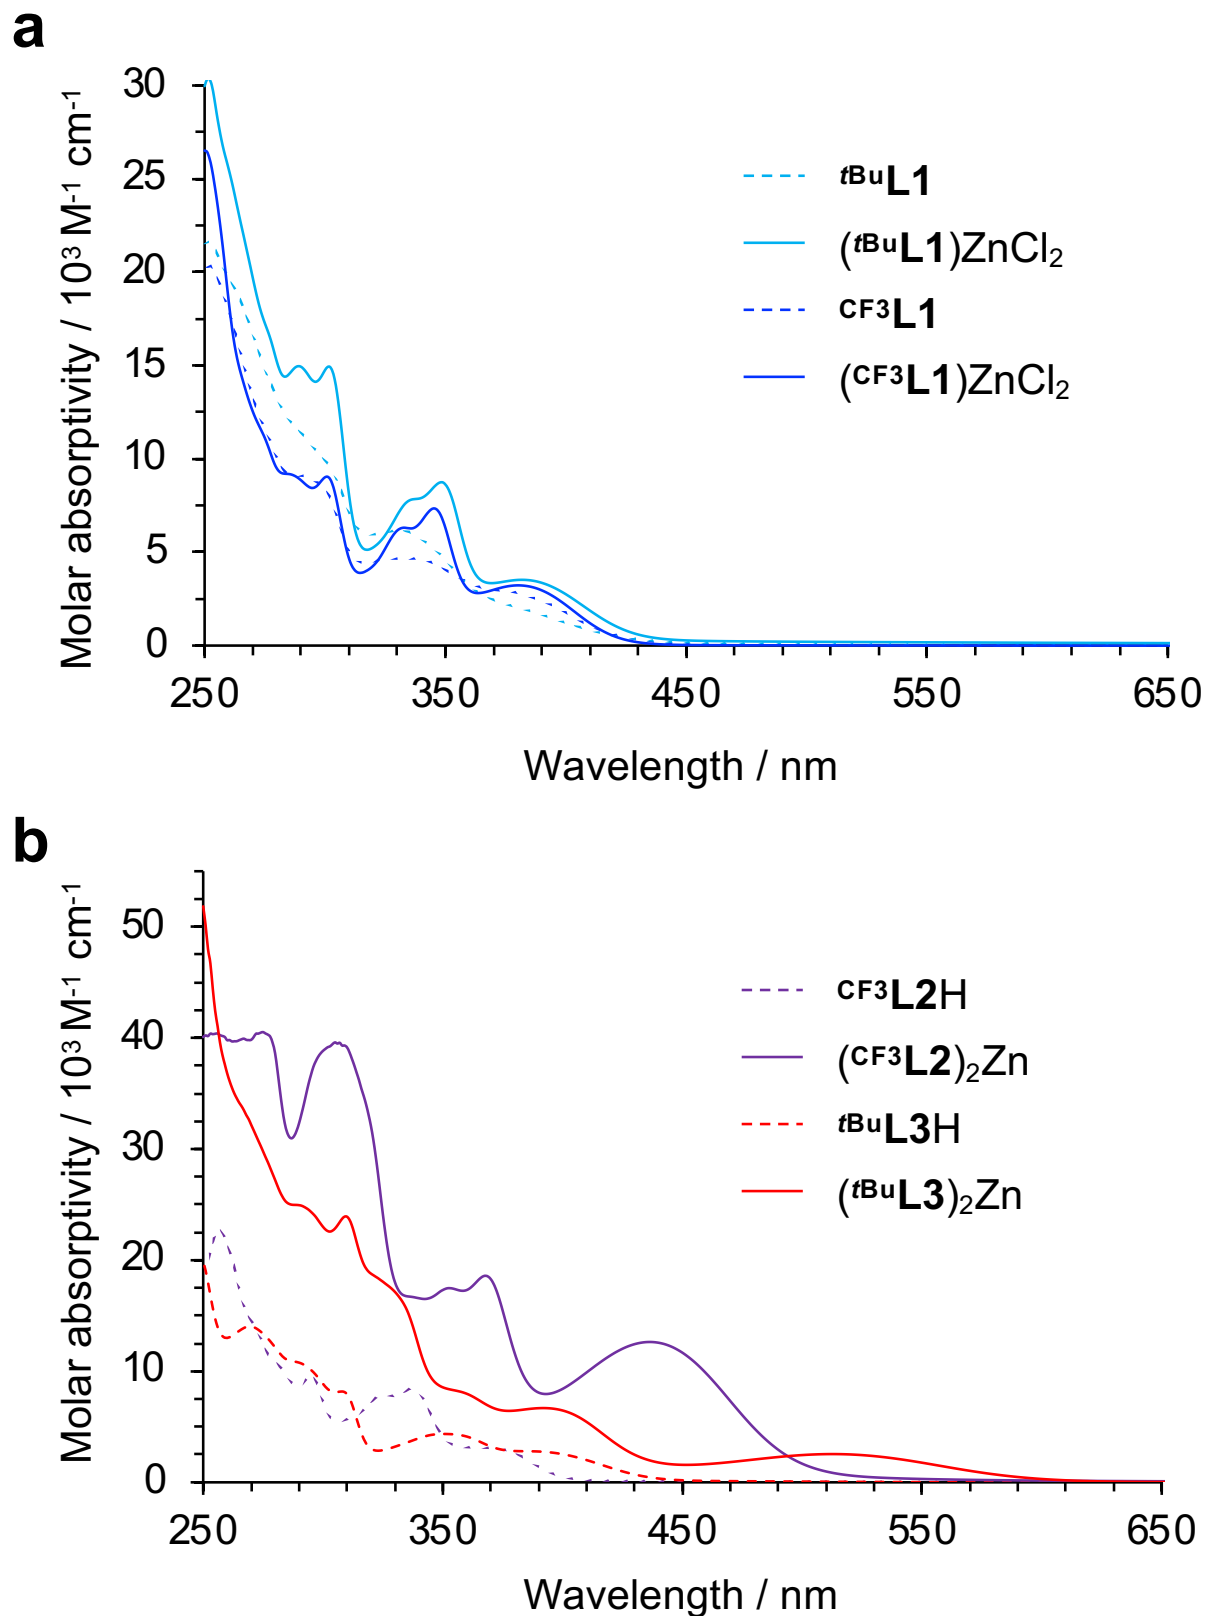

**Figure S3.** Molar absorptivity of (a)  $\text{R}^1\text{L1}$  /  $(\text{R}^1\text{L1})\text{ZnCl}_2$  and (b)  $\text{CF}_3\text{L2}$  /  $(\text{CF}_3\text{L2})_2\text{Zn}$  /  $t\text{BuL3}$  /  $(t\text{BuL3})_2\text{Zn}$  in  $\text{CH}_2\text{Cl}_2$  at 295 K.

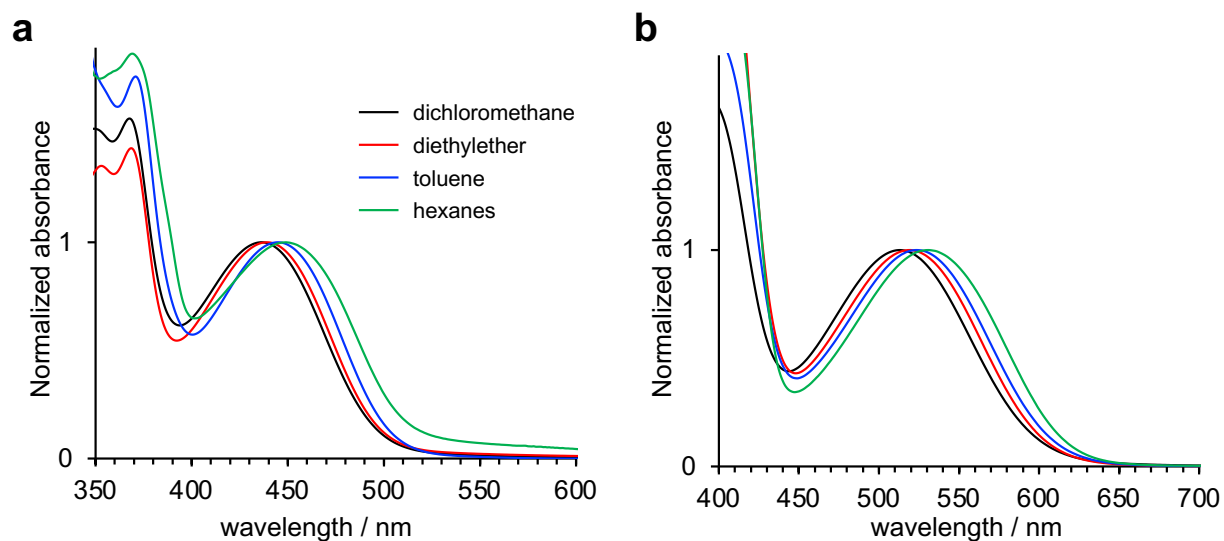

**Figure S4.** Normalized UV-Vis absorption spectra of equimolar solutions ( $1.0 \times 10^{-4}$  M) of (a)  $(\text{CF}_3\text{L2})_2\text{Zn}$  and (b)  $(\text{tBuL3})_2\text{Zn}$  in solvents of varying polarities at 295 K.

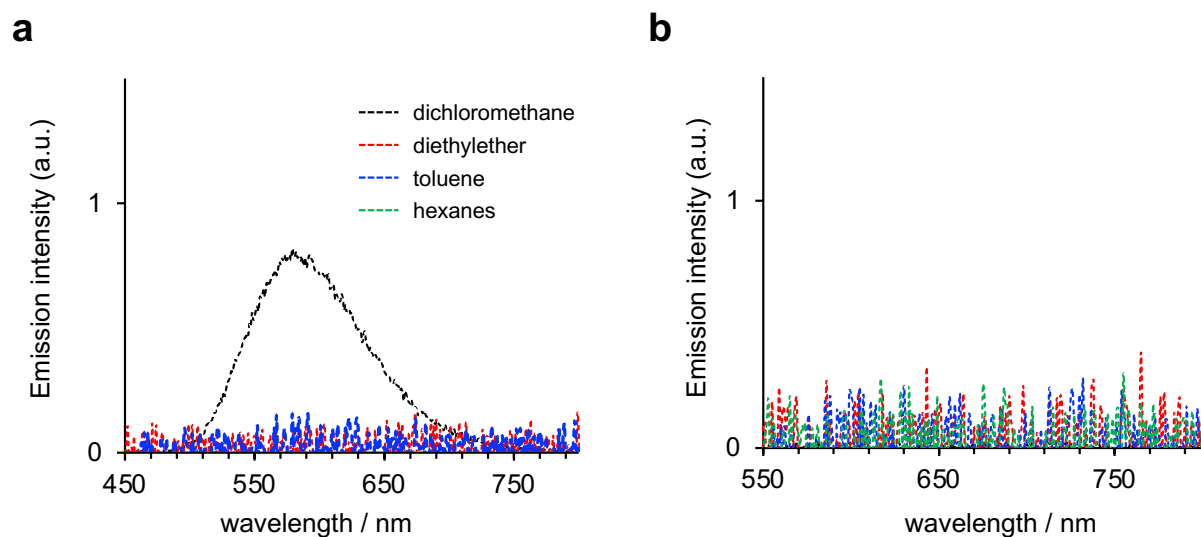

**Figure S5.** Emission spectra of equimolar solutions ( $1.0 \times 10^{-4}$  M) of (a)  $(\text{CF}_3\text{L2})_2\text{Zn}$  and (b)  $(\text{tBuL3})_2\text{Zn}$  in solvents of varying polarities at 295 K.

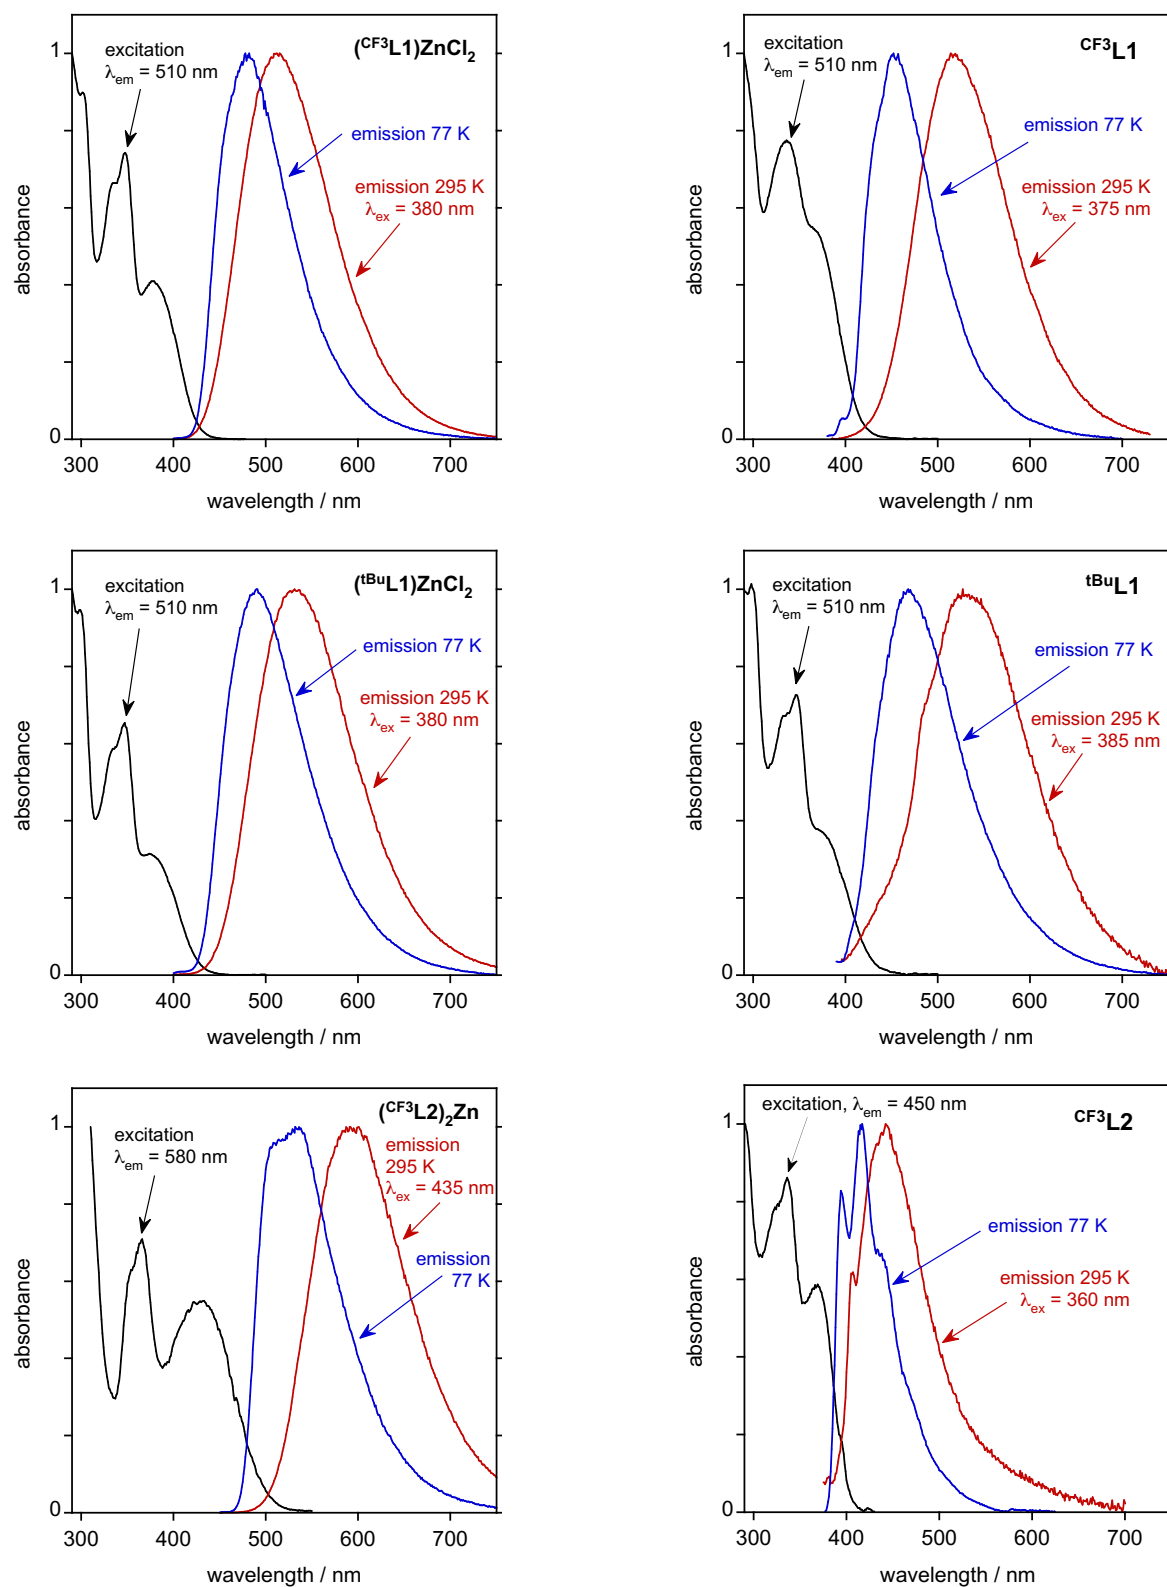

**Figure S6.** Emission and excitation spectra in  $\text{CH}_2\text{Cl}_2$  at 295 K (red and black lines respectively, registered at the  $\lambda_{\text{ex}}$  and  $\lambda_{\text{em}}$  values shown), and emission in EPA at 77 K (blue lines, at the same  $\lambda_{\text{ex}}$ ), for the zinc complexes indicated (left) and for the corresponding proligands (right).

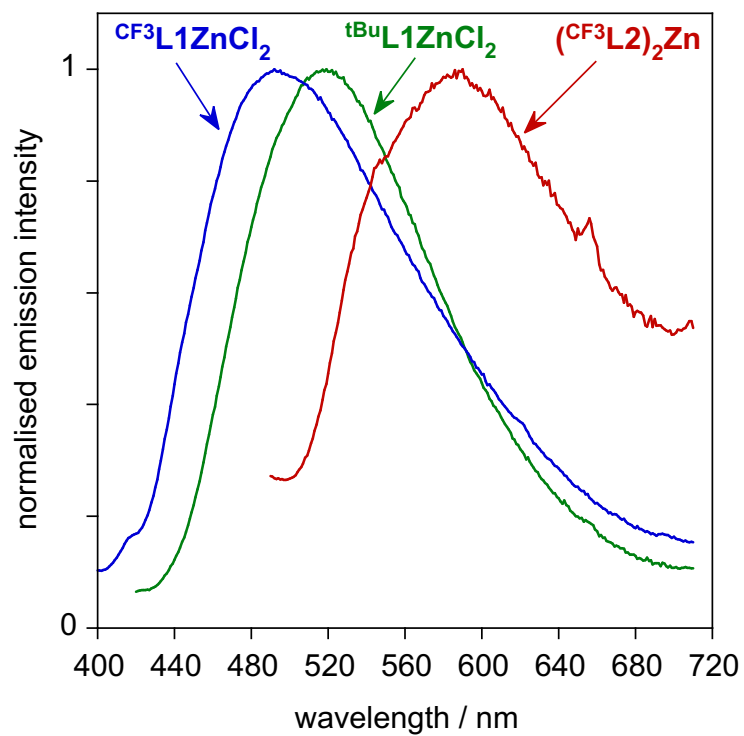

**Figure S7.** Normalized emission spectra in the solid state at 295 K:  $(\text{CF}_3\text{L1})\text{ZnCl}_2$  ( $\lambda_{\text{ex}} = 380$  nm, blue line),  $(t\text{BuL1})\text{ZnCl}_2$  ( $\lambda_{\text{ex}} = 400$  nm, green line), and  $(\text{CF}_3\text{L2})_2\text{Zn}$  ( $\lambda_{\text{ex}} = 400$  nm, red line).

**Table S1.** Comparison of selected photophysical properties of Zn(II) systems.

| Compound                                                                                | $\lambda_{\text{max}}$ (abs) | $\lambda_{\text{em}}$ | $\phi$ | Ref.             |
|-----------------------------------------------------------------------------------------|------------------------------|-----------------------|--------|------------------|
| [(PNNP)Zn] <sub>2</sub>                                                                 | 425 (sh)                     | 525                   | 0.93   | <sup>1</sup>     |
| bis( <i>bis</i> -imidazo[1,2- <i>a</i> ]pyridine)Zn(II) [BF <sub>4</sub> ] <sub>2</sub> | 341                          | 450                   | 0.50   | <sup>2</sup>     |
| ( <i>meta</i> -(2-hydroxyphenyl)benzoxazole<br>di(anisyl)amino)Zn(II)                   | 400                          | 500                   | 0.50   | <sup>3</sup>     |
| ( <i>para</i> -(2-hydroxyphenyl)benzoxazole<br>di(anisyl)amino)Zn(II)                   | 375                          | 450                   | 0.86   | <sup>3</sup>     |
| heteroleptic bis(dipyrrinato)zinc(II)                                                   | 495                          | 578                   | 0.76   | <sup>4</sup>     |
| (N <sup>^</sup> N <sup>^</sup> O) <sub>2</sub> Zn                                       | 366                          | 593                   | 0.06   | <sup>5</sup>     |
| ( <sup>CF3</sup> L1)ZnCl <sub>2</sub>                                                   | 380                          | 512                   | 0.64   | <i>this work</i> |
| ( <sup>tBu</sup> L1)ZnCl <sub>2</sub>                                                   | 383                          | 530                   | 0.41   | <i>this work</i> |
| ( <sup>CF3</sup> L2) <sub>2</sub> Zn                                                    | 436                          | 595                   | 0.26   | <i>this work</i> |

References for Table S1:

- 1 P. W. Roesky, Intensely Photoluminescent Diamidophosphines of the Alkaline-Earth Metals, Aluminum, and Zinc, *Angew. Chem., Int. Ed.*, 2018, **57**, 14265–14269.
- 2 V. Giuso, E. Jouaiti, C. Cebrián, S. Parant-Aury, N. Kyritsakas, C. Gourlaouen and M. Mauro, Symmetry-Broken Charge-Transfer Excited State in Homoleptic Zinc(II) Imidazo[1,2-*a*]pyridine Complexes, *ChemPhotoChem*, 2023, **7**, e202300092.
- 3 J. A. Kübler, B. Pfund and O. S. Wenger, Zinc(II) Complexes with Triplet Charge-Transfer Excited States Enabling Energy-Transfer Catalysis, Photoinduced Electron Transfer, and Upconversion, *JACS Au*, 2022, **2**, 2367–2380.
- 4 S. Kusaka, R. Sakamoto, Y. Kitagawa, M. Okumura and H. Nishihara, An Extremely Bright Heteroleptic Bis(dipyrrinato)zinc(II) Complex, *Chemistry – An Asian Journal*, 2012, **7**, 907–910.
- 5 I. B. Lozada, J. D. Braun, J. A. G. Williams and D. E. Herbert, Yellow-Emitting, Pseudo-Octahedral Zinc Complexes of Benzannulated N<sup>^</sup>N<sup>^</sup>O Pincer-Type Ligands, *Inorg. Chem.*, 2022, **61**, 17568–17578.

## Structural Figures and Tables

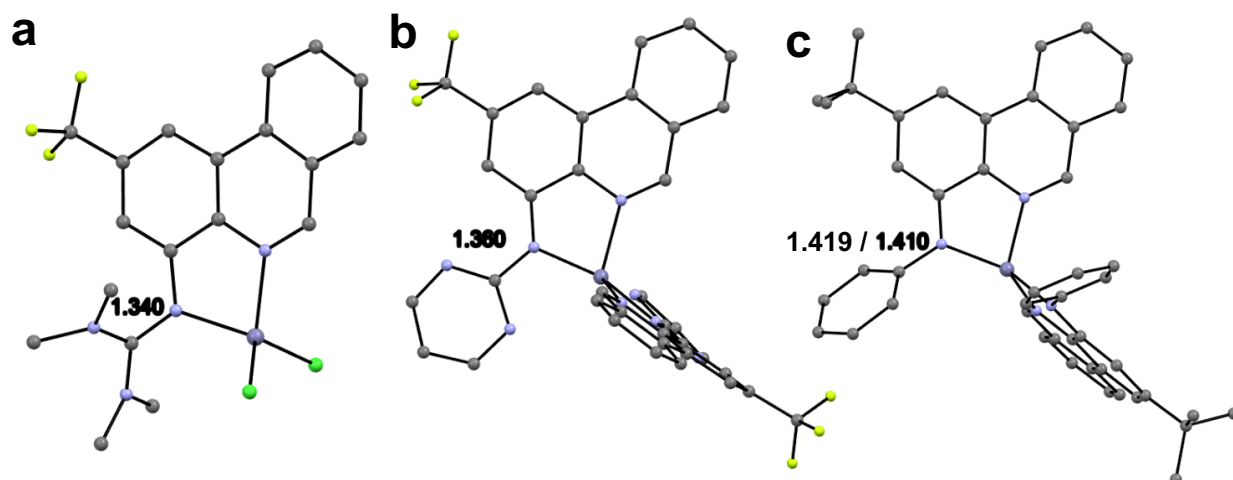

**Figure S8.** Comparison of C–N bond lengths of (a)  $(\text{CF}_3\text{L1})\text{ZnCl}_2$ , (b)  $(\text{CF}_3\text{L2})_2\text{Zn}$ , and (c)  $(t\text{BuL3})_2\text{Zn}$  in the solid state. Hydrogen atoms and solvent molecules omitted for clarity. Solid-state structure of  $(t\text{BuL3})_2\text{Zn}$  reproduced from Reference 1.

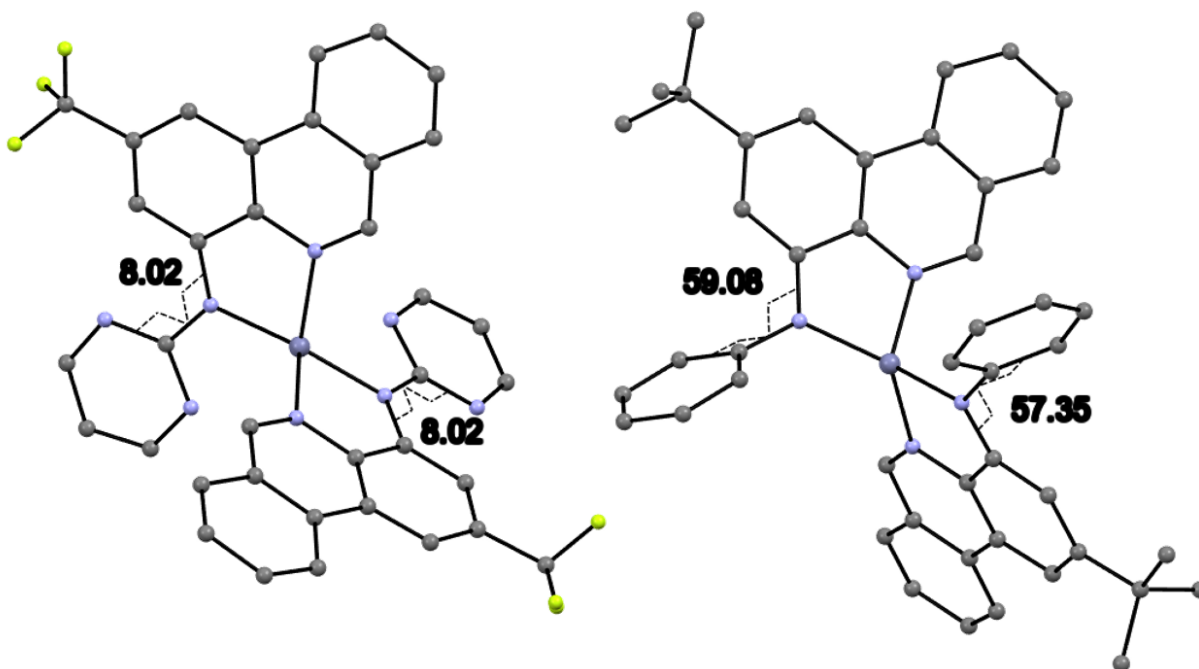

**Figure S9.** Torsion angles between ring fragments and phenanthridinyl planes in solid-state structures of  $(\text{CF}_3\text{L2})_2\text{Zn}$  (C–N–C–N) and  $(t\text{BuL3})_2\text{Zn}$  (C–N–C–C). Hydrogen atoms and solvent molecules omitted for clarity. Solid-state structure of  $(t\text{BuL3})_2\text{Zn}$  reproduced from Reference 2.

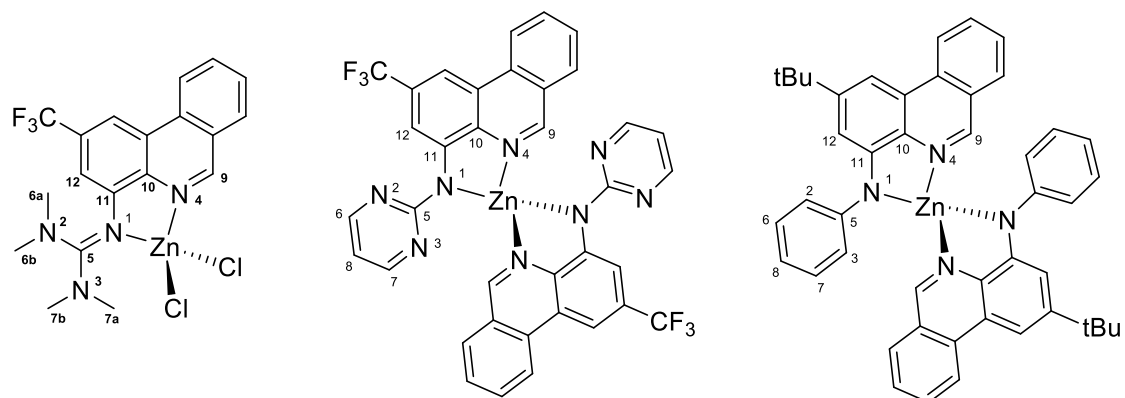

**Figure S10.** Atomic labels for Tables S2-S5.

**Table S2.** Comparison of experimentally determined and calculated<sup>a</sup> bond distances (Å) and angles (°) for (CF<sub>3</sub>L1)ZnCl<sub>2</sub>. See Figure S10 for numbering scheme.

| Bond/Å           | (CF <sub>3</sub> L1)ZnCl <sub>2</sub> |       |                       |
|------------------|---------------------------------------|-------|-----------------------|
|                  | XRD                                   | DFT   | Δd  <sup>b</sup>      |
| N1-Zn            | 2.017                                 | 2.085 | 0.068                 |
| N4-Zn            | 2.067                                 | 2.109 | 0.042                 |
| N1-C5            | 1.340                                 | 1.341 | 0.001                 |
| N1-C11           | 1.402                                 | 1.388 | 0.014                 |
| N2-C5            | 1.347                                 | 1.362 | 0.015                 |
| N2-C6a           | 1.455                                 | 1.457 | 0.002                 |
| N2-C6b           | 1.451                                 | 1.459 | 0.008                 |
| N3-C5            | 1.336                                 | 1.355 | 0.019                 |
| N3-C7a           | 1.459                                 | 1.460 | 0.001                 |
| N3-C7b           | 1.451                                 | 1.459 | 0.008                 |
| C11-C12          | 1.370                                 | 1.400 | 0.030                 |
| C11-C10          | 1.417                                 | 1.440 | 0.023                 |
| N4-C9            | 1.297                                 | 1.306 | 0.009                 |
| N4-C10           | 1.380                                 | 1.380 | 0.000                 |
| MAD <sup>c</sup> |                                       |       | 0.017                 |
| Angle/(°)        | XRD                                   | DFT   | Δ angle  <sup>b</sup> |
| N1-Zn-N4         | 81.31                                 | 80.03 | 1.3                   |
| C11-N1-Zn        | 112.8                                 | 113.1 | 0.3                   |
| C5-N1-Zn         | 118.9                                 | 118.3 | 0.6                   |
| Zn-N4-C9         | 128.7                                 | 126.4 | 2.3                   |
| Zn-N4-C10        | 112.1                                 | 112.7 | 0.6                   |
| C11-N1-C5        | 119.8                                 | 124.0 | 4.2                   |
| N1-C5-N2         | 122.4                                 | 123.0 | 0.6                   |
| N1-C5-N3         | 117.8                                 | 118.3 | 0.5                   |
| N2-C5-N3         | 119.7                                 | 118.5 | 1.2                   |
| C5-N2-C6a        | 126.4                                 | 121.4 | 5.0                   |
| C5-N2-C6b        | 123.1                                 | 122.9 | 0.2                   |
| C6a-N2-C6b       | 115.4                                 | 115.6 | 0.2                   |
| C5-N3-C7a        | 122.8                                 | 122.4 | 0.4                   |
| C5-N3-C7b        | 121.1                                 | 121.2 | 0.1                   |
| C7a-N3-C7b       | 115.7                                 | 115.2 | 0.5                   |
| N1-C11-C12       | 124.2                                 | 125.1 | 0.9                   |
| N1-C11-C10       | 116.6                                 | 117.1 | 0.5                   |
| C10-C11-C12      | 119.2                                 | 117.7 | 1.5                   |
| C11-C10-N4       | 116.5                                 | 116.9 | 0.4                   |
| C10-N4-C9        | 119.1                                 | 120.7 | 1.6                   |
| MAD <sup>c</sup> |                                       |       | 1.1                   |

<sup>a</sup> B3LYP (SMD "dichloromethane"/ def2-svp def2/j)

<sup>b</sup> Absolute difference between experimentally determined and calculated bond distances or angles

<sup>c</sup> Mean absolute deviation

**Table S3.** Comparison of experimentally determined and calculated<sup>a</sup> bond distances (Å) and angles (°) for (CF<sub>3</sub>L2)<sub>2</sub>Zn. See Figure S10 for numbering scheme.

| Bond/Å           | (CF <sub>3</sub> L2) <sub>2</sub> Zn |       |                       |
|------------------|--------------------------------------|-------|-----------------------|
|                  | XRD                                  | DFT   | Δd  <sup>b</sup>      |
| N1-Zn            | 1.944                                | 1.995 | 0.051                 |
| N4-Zn            | 2.097                                | 2.126 | 0.029                 |
| N1-C5            | 1.360                                | 1.359 | 0.001                 |
| N1-C11           | 1.375                                | 1.373 | 0.002                 |
| N2-C5            | 1.343                                | 1.350 | 0.007                 |
| N2-C6            | 1.335                                | 1.335 | 0.000                 |
| N3-C5            | 1.355                                | 1.365 | 0.01                  |
| N3-C7            | 1.328                                | 1.326 | 0.002                 |
| C6-C8            | 1.366                                | 1.394 | 0.028                 |
| C7-C8            | 1.378                                | 1.402 | 0.024                 |
| C11-C12          | 1.396                                | 1.402 | 0.006                 |
| C11-C10          | 1.439                                | 1.451 | 0.012                 |
| N4-C9            | 1.291                                | 1.307 | 0.016                 |
| N4-C10           | 1.391                                | 1.379 | 0.012                 |
| MAD <sup>c</sup> |                                      |       | 0.014                 |
| Angle/(°)        | XRD                                  | DFT   | Δ angle  <sup>b</sup> |
| N1-Zn-N4         | 81.23                                | 80.44 | 0.8                   |
| C11-N1-Zn        | 117.0                                | 116.4 | 0.6                   |
| C5-N1-Zn         | 116.1                                | 114.7 | 1.4                   |
| Zn-N4-C9         | 129.5                                | 128.2 | 1.3                   |
| Zn-N4-C10        | 110.6                                | 110.9 | 0.3                   |
| C11-N1-C5        | 126.9                                | 129.0 | 2.1                   |
| N1-C5-N2         | 122.4                                | 123.5 | 1.1                   |
| N1-C5-N3         | 112.8                                | 112.8 | 0.0                   |
| N2-C5-N3         | 124.9                                | 123.6 | 1.3                   |
| C5-N2-C6         | 116.2                                | 117.4 | 1.2                   |
| N2-C6-C8         | 123.5                                | 123.1 | 0.4                   |
| C6-C8-C7         | 116.1                                | 115.6 | 0.5                   |
| C5-N3-C7         | 116.3                                | 117.9 | 1.6                   |
| N3-C7-C8         | 123.1                                | 122.4 | 0.7                   |
| N1-C11-C12       | 128.2                                | 127.5 | 0.7                   |
| N1-C11-C10       | 114.8                                | 115.4 | 0.6                   |
| C10-C11-C12      | 117.0                                | 117.2 | 0.2                   |
| C11-C10-N4       | 116.2                                | 116.9 | 0.7                   |
| C10-N4-C9        | 119.9                                | 120.9 | 1.0                   |
| MAD <sup>c</sup> |                                      |       | 0.87                  |

<sup>a</sup> B3LYP (SMD "dichloromethane"/ def2-svp def2/j)

<sup>b</sup> Absolute difference between experimentally determined and calculated bond distances or angles

<sup>c</sup> Mean absolute deviation

**Table S4.** Comparison of experimentally determined and calculated<sup>a</sup> bond distances (Å) and angles (°) for (<sup>t</sup>BuL3)<sub>2</sub>Zn. Solid state structure of (<sup>t</sup>BuL3)<sub>2</sub>Zn reproduced from Reference <sup>1</sup>. See Figure S10 for numbering scheme.

| Bond/Å           | ( <sup>t</sup> BuL3) <sub>2</sub> Zn |       |                       |
|------------------|--------------------------------------|-------|-----------------------|
|                  | XRD                                  | DFT   | Δd  <sup>b</sup>      |
| N1-Zn            | 1.946                                | 1.991 | 0.045                 |
| N4-Zn            | 2.060                                | 2.075 | 0.015                 |
| N1-C5            | 1.410                                | 1.397 | 0.013                 |
| N1-C11           | 1.372                                | 1.371 | 0.001                 |
| C2-C5            | 1.397                                | 1.417 | 0.020                 |
| C2-C6            | 1.388                                | 1.398 | 0.010                 |
| C3-C5            | 1.386                                | 1.417 | 0.031                 |
| C3-C7            | 1.384                                | 1.396 | 0.012                 |
| C6-C8            | 1.378                                | 1.400 | 0.022                 |
| C7-C8            | 1.390                                | 1.401 | 0.011                 |
| C11-C12          | 1.392                                | 1.407 | 0.015                 |
| C11-C10          | 1.435                                | 1.450 | 0.015                 |
| N4-C9            | 1.307                                | 1.309 | 0.002                 |
| N4-C10           | 1.382                                | 1.378 | 0.004                 |
| MAD <sup>c</sup> |                                      |       | 0.015                 |
| Angle/(°)        | XRD                                  | DFT   | Δ angle  <sup>b</sup> |
| N1-Zn-N4         | 82.72                                | 83.20 | 0.5                   |
| C11-N1-Zn        | 114.1                                | 112.6 | 1.5                   |
| C5-N1-Zn         | 125.9                                | 122.0 | 3.9                   |
| Zn-N4-C9         | 129.4                                | 128.9 | 0.5                   |
| Zn-N4-C10        | 110.5                                | 106.7 | 3.8                   |
| C11-N1-C5        | 120.0                                | 124.9 | 4.9                   |
| N1-C5-C2         | 122.6                                | 124.4 | 1.8                   |
| N1-C5-C3         | 119.1                                | 118.5 | 0.6                   |
| C2-C5-C3         | 118.2                                | 117.0 | 1.2                   |
| C5-C2-C6         | 120.4                                | 121.1 | 0.7                   |
| C2-C6-C8         | 120.8                                | 121.1 | 0.3                   |
| C6-C8-C7         | 119.1                                | 118.6 | 0.5                   |
| C5-C3-C7         | 121.0                                | 121.6 | 0.6                   |
| C3-C7-C8         | 120.6                                | 120.7 | 0.1                   |
| N1-C11-C12       | 126.8                                | 126.6 | 0.2                   |
| N1-C11-C10       | 116.6                                | 117.0 | 0.4                   |
| C10-C11-C12      | 116.5                                | 116.3 | 0.2                   |
| C11-C10-N4       | 115.7                                | 117.0 | 1.3                   |
| C10-N4-C9        | 119.8                                | 121.2 | 1.4                   |
| MAD <sup>c</sup> |                                      |       | 1.3                   |

<sup>a</sup> B3LYP (SMD “dichloromethane”/ def2-svp def2/j)

<sup>b</sup> Absolute difference between experimentally determined and calculated bond distances or angles

<sup>c</sup> Mean absolute deviation

**Table S5.** Comparison of solid-state structure bond distances (Å) and angles (°) of complexes of varying N<sub>amido</sub> character. Solid state structure of (tBuL3)<sub>2</sub>Zn reproduced from Reference <sup>1</sup>. See Figure S10 for numbering scheme.

| Bond/Å                 | ( <sup>CF3</sup> L1)ZnCl <sub>2</sub> | ( <sup>CF3</sup> L2) <sub>2</sub> Zn | (tBuL3) <sub>2</sub> Zn | Δd  <sup>a</sup>      | Δd  <sup>b</sup>      | Δd  <sup>c</sup>      |
|------------------------|---------------------------------------|--------------------------------------|-------------------------|-----------------------|-----------------------|-----------------------|
| N1-Zn                  | 2.017                                 | 1.944                                | 1.946                   | 0.073                 | 0.071                 | 0.002                 |
| N4-Zn                  | 2.067                                 | 2.097                                | 2.060                   | 0.03                  | 0.007                 | 0.037                 |
| N1-C5                  | 1.340                                 | 1.360                                | 1.410                   | 0.02                  | 0.07                  | 0.05                  |
| N1-C11                 | 1.402                                 | 1.375                                | 1.372                   | 0.027                 | 0.03                  | 0.003                 |
| C2-C5/<br>N2-C5        | 1.347                                 | 1.343                                | 1.397                   | 0.004                 | 0.05                  | 0.054                 |
| C2-C6/<br>N2-C6        | n/a                                   | 1.335                                | 1.388                   | n/a                   | n/a                   | 0.053                 |
| C3-C5/<br>N3-C5        | 1.336                                 | 1.355                                | 1.386                   | 0.019                 | 0.05                  | 0.031                 |
| C3-C7/<br>N3-C7        | n/a                                   | 1.328                                | 1.384                   | n/a                   | n/a                   | 0.056                 |
| N2-C6a                 | 1.455                                 | n/a                                  | n/a                     | n/a                   | n/a                   | n/a                   |
| N2-C6b                 | 1.451                                 | n/a                                  | n/a                     | n/a                   | n/a                   | n/a                   |
| N3-C7a                 | 1.459                                 | n/a                                  | n/a                     | n/a                   | n/a                   | n/a                   |
| N3-Cb                  | 1.451                                 | n/a                                  | n/a                     | n/a                   | n/a                   | n/a                   |
| C6-C8                  | n/a                                   | 1.366                                | 1.378                   | n/a                   | n/a                   | 0.012                 |
| C7-C8                  | n/a                                   | 1.378                                | 1.390                   | n/a                   | n/a                   | 0.012                 |
| C11-C12                | 1.370                                 | 1.396                                | 1.392                   | 0.026                 | 0.022                 | 0.004                 |
| C11-C10                | 1.417                                 | 1.439                                | 1.435                   | 0.022                 | 0.018                 | 0.004                 |
| N4-C9                  | 1.297                                 | 1.291                                | 1.307                   | 0.006                 | 0.01                  | 0.016                 |
| N4-C10                 | 1.380                                 | 1.391                                | 1.382                   | 0.011                 | 0.002                 | 0.009                 |
| MAD <sup>d</sup>       |                                       |                                      |                         | 0.023                 | 0.033                 | 0.0245                |
| Angle/(°)              | ( <sup>CF3</sup> L1)ZnCl <sub>2</sub> | ( <sup>CF3</sup> L2) <sub>2</sub> Zn | (tBuL3) <sub>2</sub> Zn | Δ angle  <sup>a</sup> | Δ angle  <sup>b</sup> | Δ angle  <sup>c</sup> |
| N1-Zn-N4               | 81.3                                  | 81.2                                 | 82.7                    | 0.1                   | 1.4                   | 1.5                   |
| C11-N1-Zn              | 112.8                                 | 117.0                                | 114.1                   | 4.2                   | 1.3                   | 2.9                   |
| C5-N1-Zn               | 118.9                                 | 116.1                                | 125.9                   | 2.8                   | 7                     | 9.8                   |
| Zn-N4-C9               | 128.7                                 | 129.5                                | 129.4                   | 0.8                   | 0.7                   | 0.1                   |
| Zn-N4-C10              | 112.1                                 | 110.6                                | 110.5                   | 1.5                   | 1.6                   | 0.1                   |
| C11-N1-C5              | 119.8                                 | 126.9                                | 120.0                   | 7.1                   | 0.2                   | 6.9                   |
| N1-C5-C2/<br>N1-C5-N2/ | 122.4                                 | 122.4                                | 122.6                   | 0                     | 0.2                   | 0.2                   |
| N1-C5-C3/<br>N1-C5-N3  | 117.8                                 | 112.8                                | 119.1                   | 5                     | 1.3                   | 6.3                   |
| C2-C5-C3/<br>N2-C5-N3  | 119.7                                 | 124.9                                | 118.2                   | 5.2                   | 1.5                   | 6.7                   |
| C5-C2-C6/<br>C5-N2-C6  | n/a                                   | 116.2                                | 120.4                   | n/a                   | n/a                   | 4.2                   |
| C2-C6-C8/<br>N2-C6-C8  | n/a                                   | 123.5                                | 120.8                   | n/a                   | n/a                   | 2.7                   |
| C5-N2-C6a              | 126.4                                 | n/a                                  | n/a                     | n/a                   | n/a                   |                       |
| C5-N2-C6b              | 123.1                                 | n/a                                  | n/a                     | n/a                   | n/a                   |                       |
| C6a-N2-C6b             | 115.4                                 | n/a                                  | n/a                     | n/a                   | n/a                   |                       |
| C5-N3-C7a              | 122.8                                 | n/a                                  | n/a                     | n/a                   | n/a                   |                       |
| C5-N3-C7b              | 121.1                                 | n/a                                  | n/a                     | n/a                   | n/a                   |                       |
| C7a-N3-C7b             | 115.7                                 | n/a                                  | n/a                     | n/a                   | n/a                   |                       |
| C6-C8-C7               | n/a                                   | 116.1                                | 119.1                   | n/a                   | n/a                   | 3                     |
| C5-C3-C7/<br>C5-N3-C7  | n/a                                   | 116.3                                | 121.0                   | n/a                   | n/a                   | 4.7                   |

|                       |       |       |       |       |       |       |
|-----------------------|-------|-------|-------|-------|-------|-------|
| C3-C7-C8/<br>N3-C7-C8 | n/a   | 123.1 | 120.6 | n/a   | n/a   | 2.5   |
| N1-C11-C12            | 124.2 | 128.2 | 126.8 | 4     | 2.6   | 1.4   |
| N1-C11-C10            | 116.6 | 114.8 | 116.6 | 1.8   | 0     | 1.8   |
| C10-C11-C12           | 119.2 | 117.0 | 116.5 | 2.2   | 2.7   | 0.5   |
| C11-C10-N4            | 116.5 | 116.2 | 115.7 | 0.3   | 0.8   | 0.5   |
| C10-N4-C9             | 119.1 | 119.9 | 119.8 | 0.8   | 0.7   | 0.1   |
| MAD <sup>d</sup>      |       |       |       | 2.557 | 1.571 | 2.942 |

<sup>a</sup> Absolute difference between solid-state structure bond distances or angles of (CF<sub>3</sub>L1)ZnCl<sub>2</sub> and (CF<sub>3</sub>L2)<sub>2</sub>Zn

<sup>b</sup> Absolute difference between solid-state structure bond distances or angles of (CF<sub>3</sub>L1)ZnCl<sub>2</sub> and (tBuL3)<sub>2</sub>Zn

<sup>c</sup> Absolute difference between solid-state structure bond distances or angles of (CF<sub>3</sub>L2)<sub>2</sub>Zn and (tBuL3)<sub>2</sub>Zn

<sup>d</sup> Mean absolute deviation

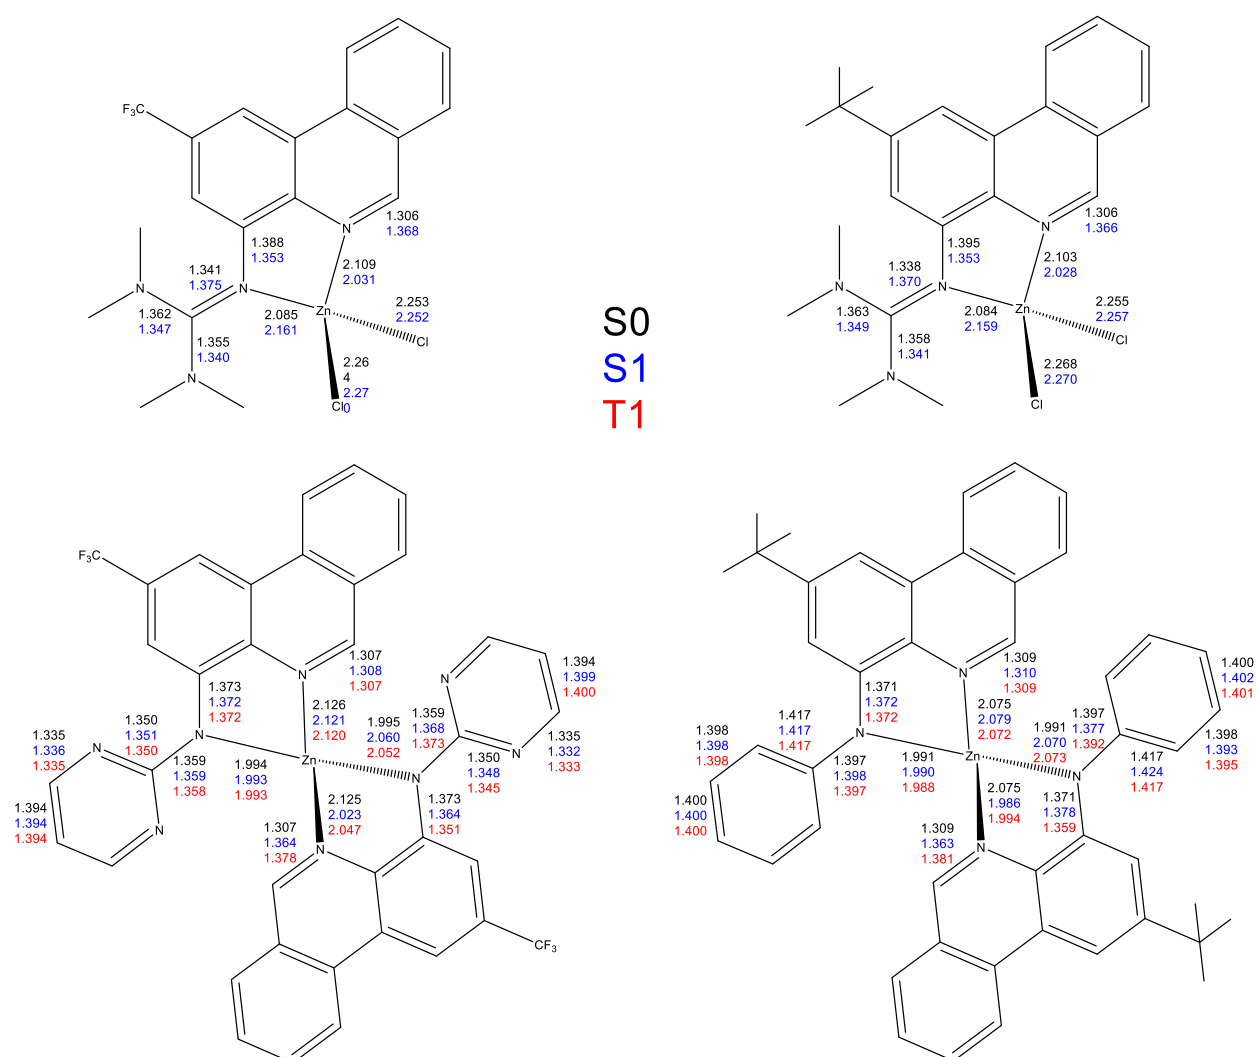

**Figure S11.** Select calculated bond distances (Å) at the S0, S1, and T1 optimized<sup>a</sup> geometries.

<sup>a</sup> B3LYP (SMD “dichloromethane”/ def2-svp def2/j)

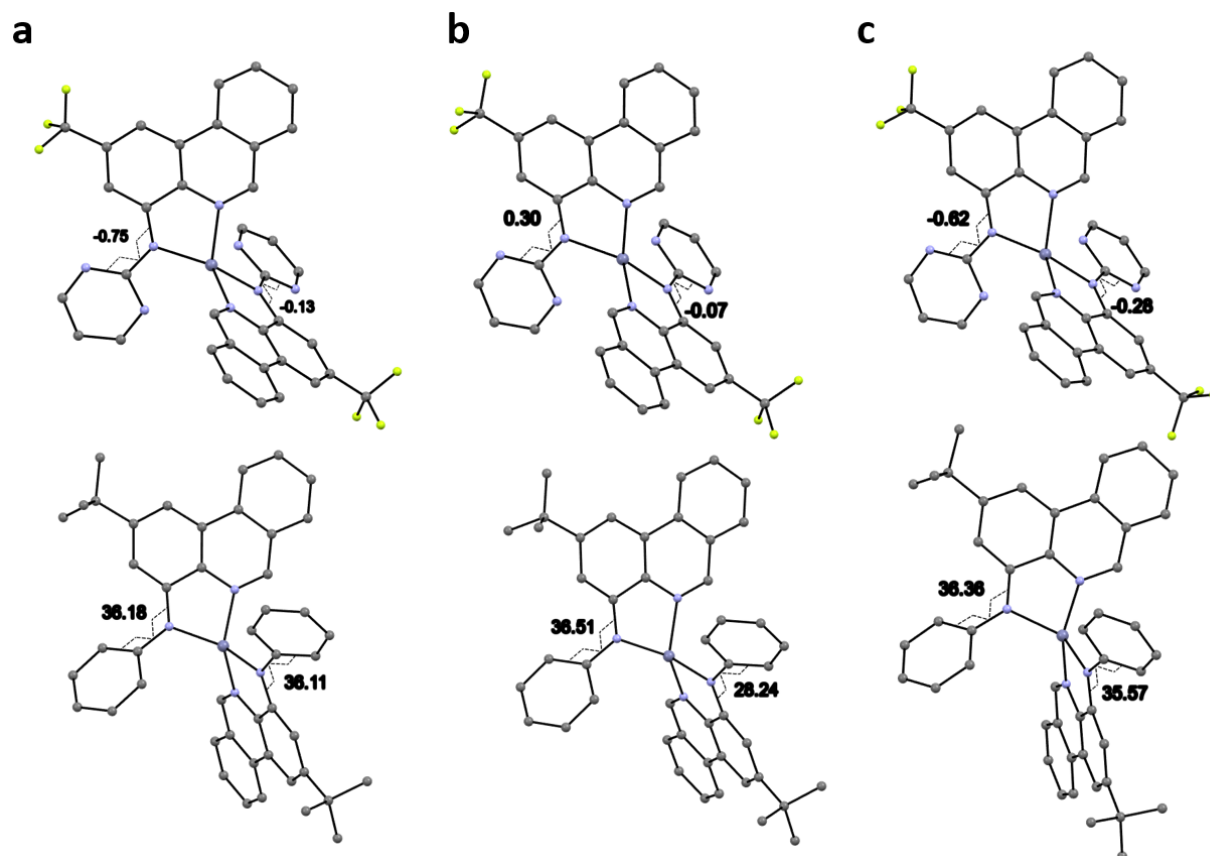

**Figure S12.** Torsion angles between ring fragments and phenanthridinyl planes in (a)  $S_0$ , (b)  $S_1$ , and (c)  $T_1$  optimized geometries of  $(\text{CF}_3\text{L2})_2\text{Zn}$  (C-N-C-N) and  $(\text{tBuL3})_2\text{Zn}$  (C-N-C-C). Hydrogens omitted for clarity.

## Computational Figures and Tables

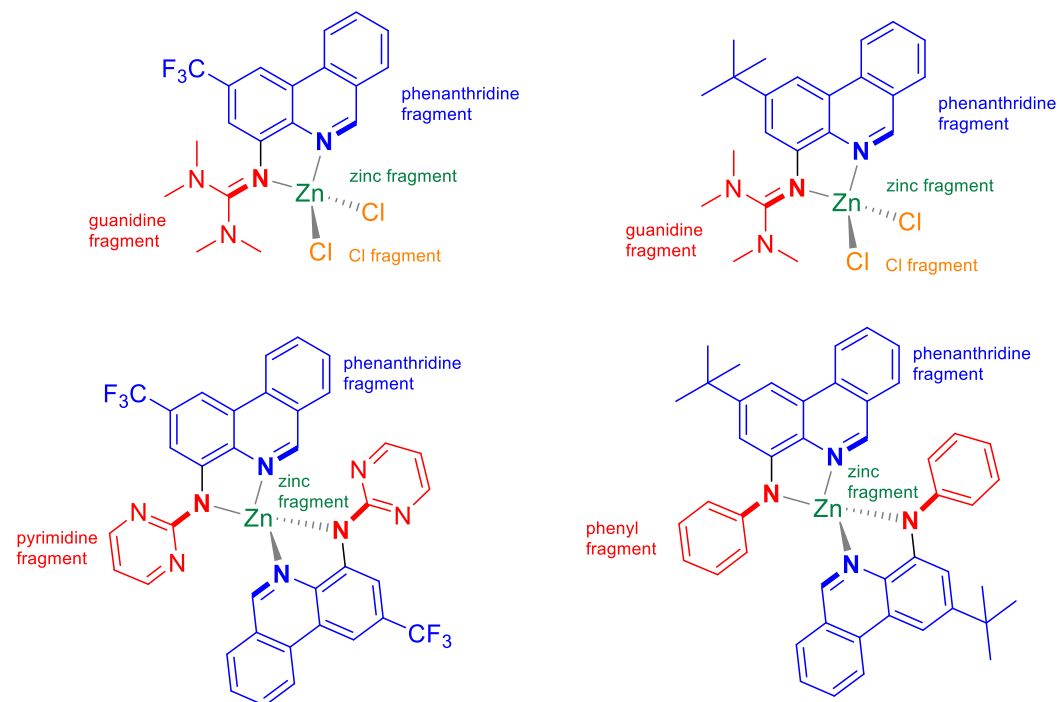

**Figure S13.** Defined fragments for Tables S8, S10, S12, and S14. C=N sub-fragments are indicated in figure by bolded line and lettering.

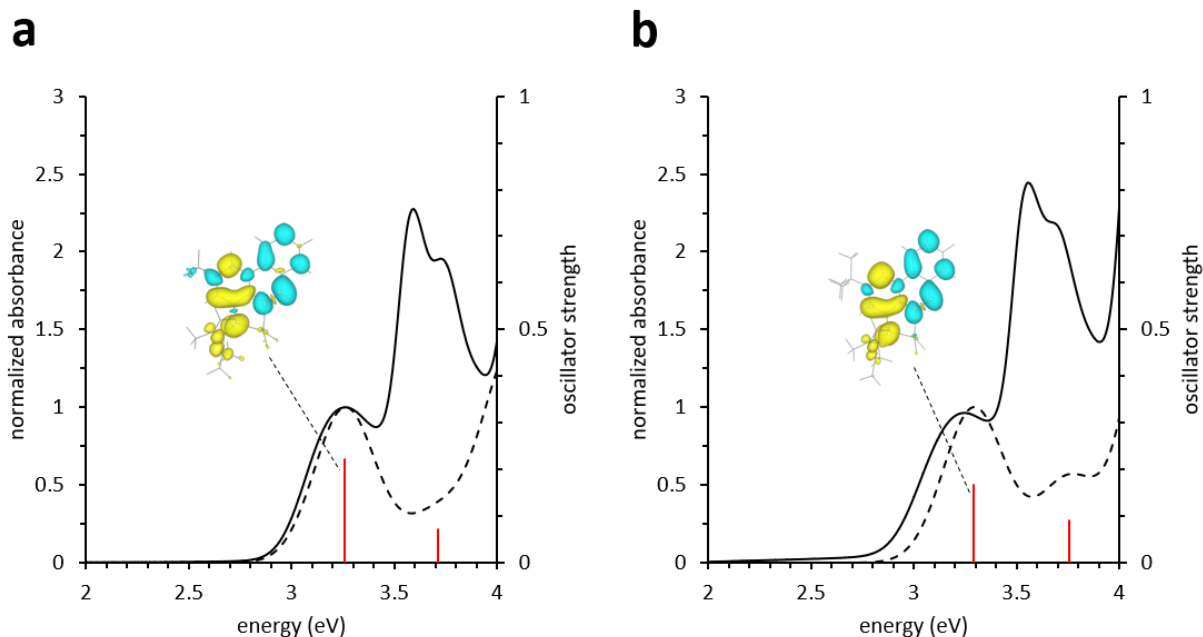

**Figure S14.** Normalized experimental UV-Vis absorption spectrum (solid trace, dichloromethane), normalized TD-DFT simulated spectrum (dotted trace, FWHM = 0.35 eV, SMD “dichloromethane”), predicted singlet-singlet vertical excitation energies ( $f_{\text{osc}} > 0.07$ ), and

electron-hole density maps (yellow = hole; blue = electron; isosurface value = 0.001) for the lowest-energy vertical electronic transitions of (a) ( $\text{CF}_3\text{L1}$ )ZnCl<sub>2</sub> and (b) ( $t\text{BuL1}$ )ZnCl<sub>2</sub>.

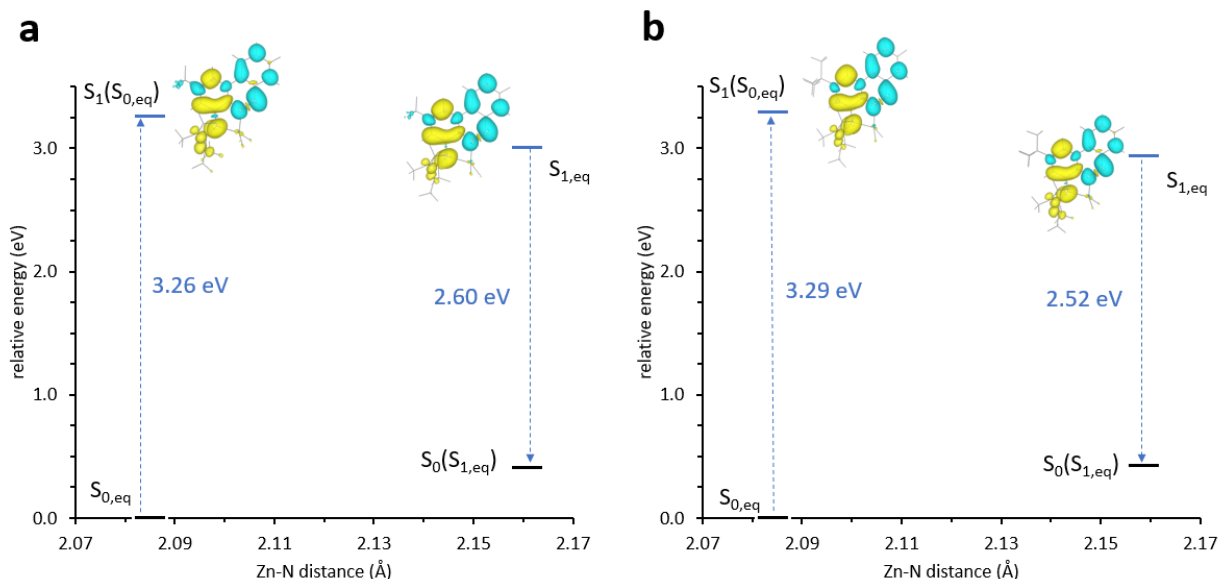

**Figure S15.** Jablonski diagram for (a) ( $\text{CF}_3\text{L1}$ )ZnCl<sub>2</sub> and (b) ( $t\text{BuL1}$ )ZnCl<sub>2</sub> along the Zn-N<sub>guanidine</sub> bond at the equilibrium S<sub>0</sub> and S<sub>1</sub> optimized geometries, with electron-hole density maps (yellow = hole; blue = electron; isosurface value = 0.001).

**Table S6.** TD-DFT predicted singlet-singlet vertical excitation energies, oscillator strengths ( $f_{\text{osc}} > 0.07$ ), and MO pair contributions (>10%) below 4 eV for ( $\text{CF}_3\text{L1}$ )ZnCl<sub>2</sub> in dichloromethane. H=HOMO; L=LUMO

| No. | E (eV) | $f_{\text{osc}}$ | MO contributions     |
|-----|--------|------------------|----------------------|
| 1   | 3.26   | 0.22             | H→L 97%              |
| 2   | 3.71   | 0.07             | H-1→L 48%, H→L+1 49% |

**Table S7.** Fragment contributions to select ground-state MOs of ( $\text{CF}_3\text{L1}$ )ZnCl<sub>2</sub> in dichloromethane.

| MO     | E (eV) | Zn (%) | Phenanthridine (%) |     |                 | Guanidine (%) |     | Cl (%) |
|--------|--------|--------|--------------------|-----|-----------------|---------------|-----|--------|
|        |        |        | full               | C=N | CF <sub>3</sub> | full          | C=N |        |
| LUMO+1 | -1.55  | 0      | 93                 | 3   | 1               | 5             | 3   | 0      |
| LUMO   | -2.14  | 1      | 95                 | 33  | 2               | 2             | 2   | 0      |
| HOMO   | -6.33  | 1      | 63                 | 4   | 1               | 31            | 22  | 2      |
| HOMO-1 | -7.01  | 0      | 98                 | 8   | 1               | 1             | 0   | 1      |

**Table S8.** TD-DFT predicted singlet-singlet vertical excitation energies, oscillator strengths ( $f_{\text{osc}}$  > 0.07), and MO pair contributions (>10%) below 4 eV for (*t*BuL1)ZnCl<sub>2</sub> in dichloromethane. H=HOMO; L=LUMO

| No. | E (eV) | $f_{\text{osc}}$ | MO contributions     |
|-----|--------|------------------|----------------------|
| 1   | 3.29   | 0.17             | H→L 95%              |
| 2   | 3.76   | 0.09             | H-1→L 42%, H→L+1 50% |

**Table S9.** Fragment contributions to select ground-state MOs of (*t*BuL1)ZnCl<sub>2</sub> in dichloromethane.

| MO     | E (eV) | Zn (%) | Phenanthridine (%) |     |     | Guanidine (%) |     | Cl (%) |
|--------|--------|--------|--------------------|-----|-----|---------------|-----|--------|
|        |        |        | full               | C=N | tBu | full          | C=N |        |
| LUMO+1 | -1.37  | 0      | 93                 | 3   | 2   | 6             | 3   | 0      |
| LUMO   | -1.93  | 1      | 95                 | 33  | 1   | 3             | 1   | 1      |
| HOMO   | -6.11  | 1      | 67                 | 5   | 2   | 30            | 19  | 1      |
| HOMO-1 | -6.74  | 0      | 99                 | 9   | 3   | 1             | 0   | 0      |

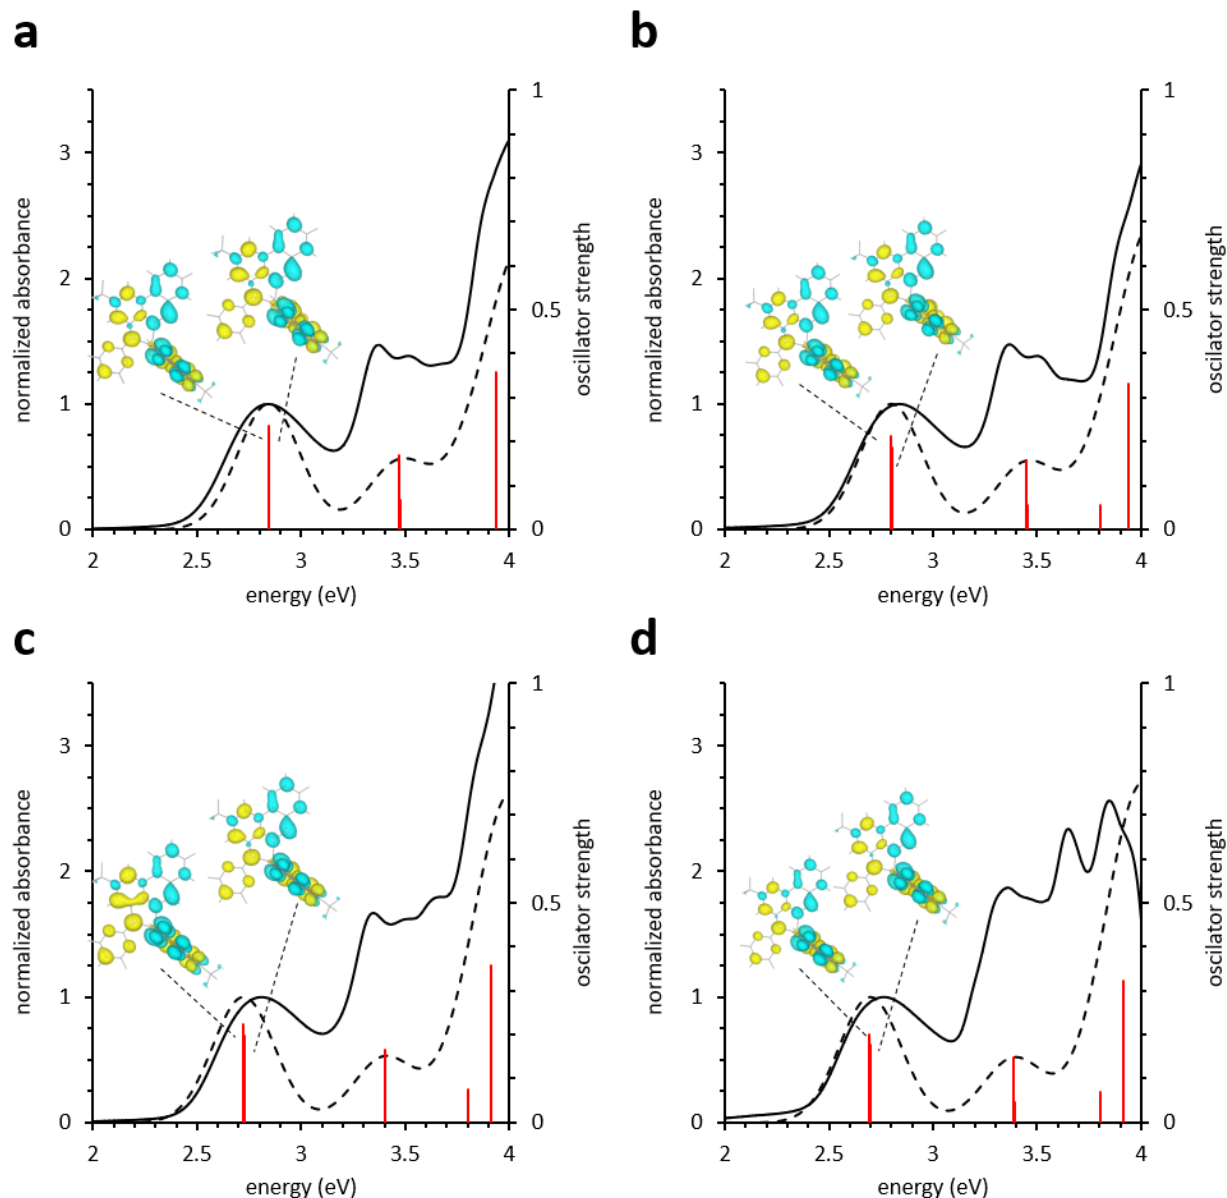

**Figure S16.** Normalized experimental UV-Vis absorption spectrum (solid trace), normalized TD-DFT simulated spectrum (dotted trace, FWHM = 0.35 eV), predicted singlet-singlet vertical excitation energies ( $f_{\text{osc}} > 0.05$ ), and electron-hole density maps (yellow = hole; blue = electron; isosurface value = 0.001) for the lowest-energy vertical electronic transitions of  $(\text{CF}_3\text{L2})_2\text{Zn}$  in (a) dichloromethane, (b) diethyl ether, (c) toluene, and (d) n-hexane.

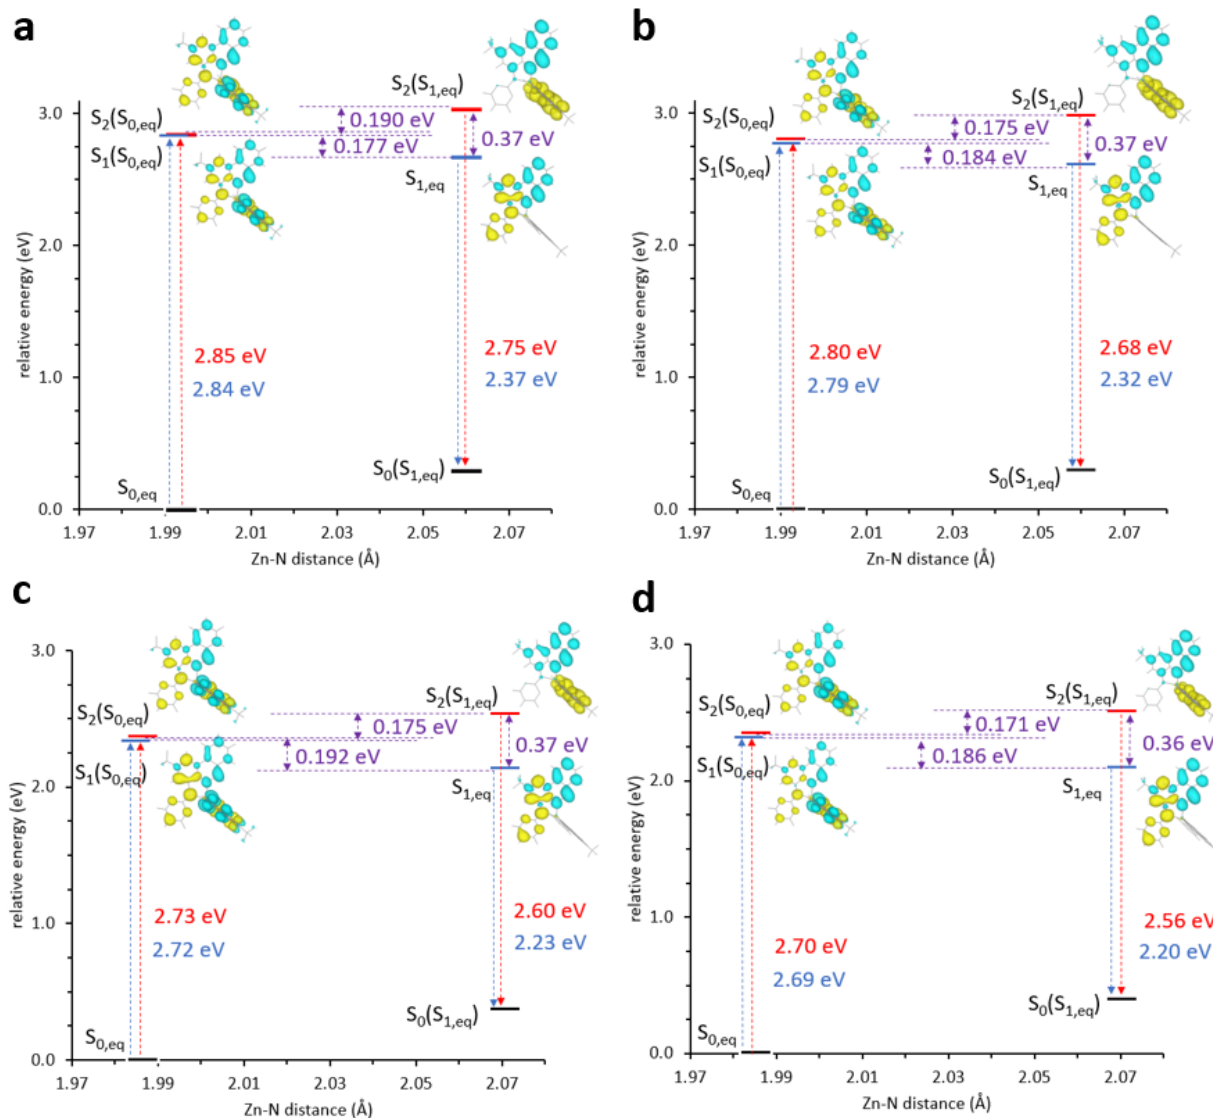

**Figure S17.** Jablonski diagram in the singlet manifold for  $(\text{CF}_3\text{L2})_2\text{Zn}$  along the Zn-N<sub>pyrimidine</sub> bond at the equilibrium  $S_0$  and  $S_1$  optimized geometries, with electron-hole density maps (yellow = hole; blue = electron; isosurface value = 0.001) in (a) dichloromethane, (b) diethyl ether, (c) toluene, and (d) n-hexane.

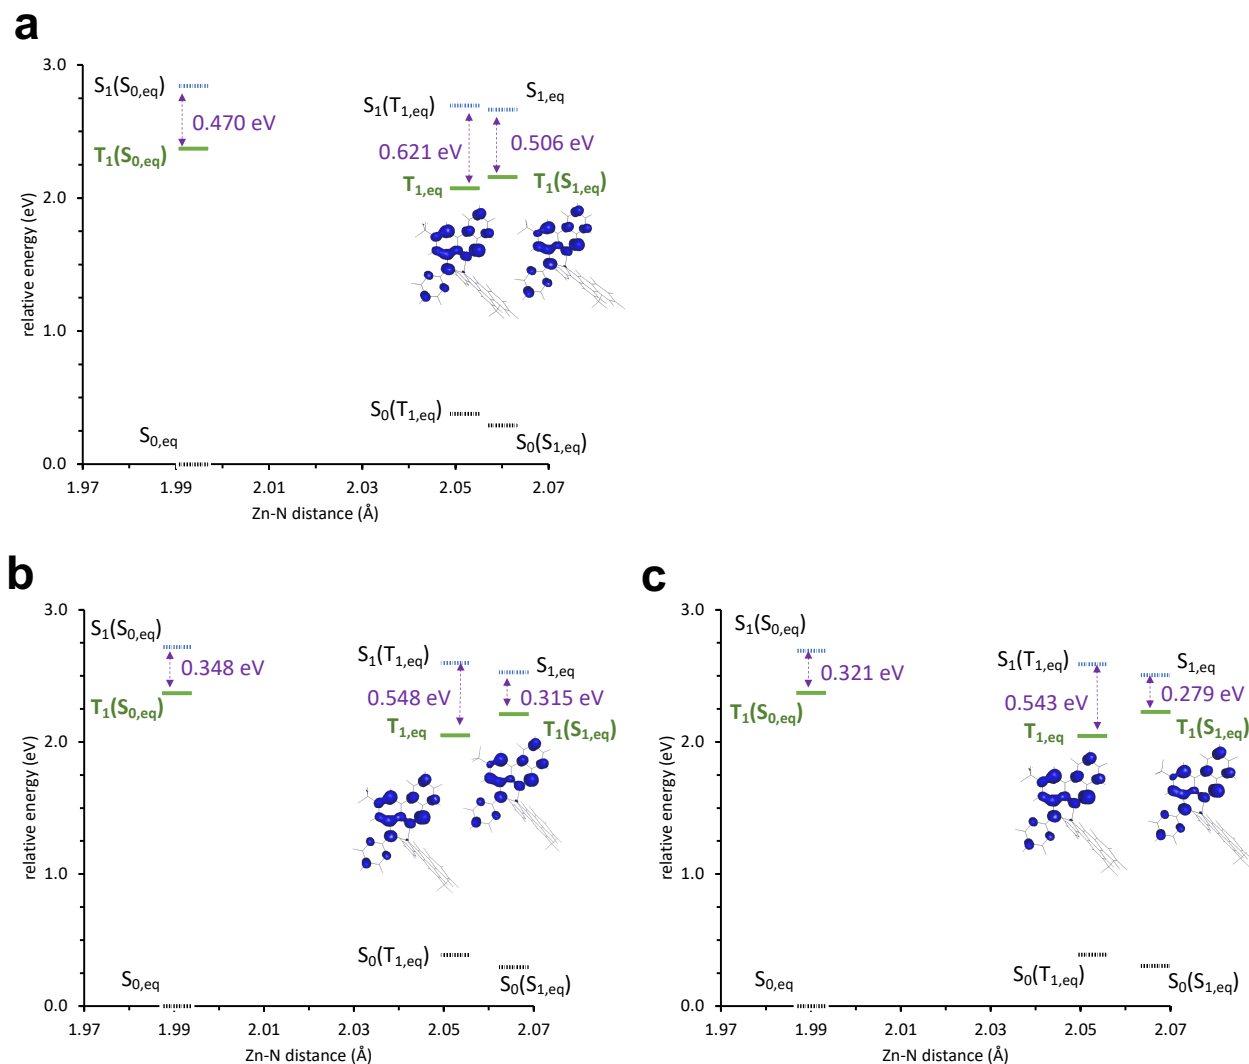

**Figure S18.** Jablonski diagram with  $T_1$  states for  $(\text{CF}_3\text{L}_2)_2\text{Zn}$  along the Zn- $\text{N}_{\text{pyrimidine}}$  bond at the equilibrium  $S_0$ ,  $S_1$ , and  $T_1$  optimized geometries, with spin density maps (isosurface value = 0.004) in (a) dichloromethane, (b) toluene and (c) n-hexane.

**Table S10.** TD-DFT predicted singlet-singlet vertical excitation energies, oscillator strengths ( $f_{\text{osc}} > 0.05$ ), and MO pair contributions ( $>10\%$ ) for  $(\text{CF}_3\text{L}_2)_2\text{Zn}$  in dichloromethane. H=HOMO; L=LUMO

| No. | E (eV) | $f_{\text{osc}}$ | MO contributions                                   |
|-----|--------|------------------|----------------------------------------------------|
| 1   | 2.84   | 0.23             | H-1 $\rightarrow$ L 49%, H $\rightarrow$ L+1 49%   |
| 2   | 2.85   | 0.21             | H $\rightarrow$ L 53%, H-1 $\rightarrow$ L+1 45%   |
| 5   | 3.47   | 0.17             | H-1 $\rightarrow$ L+2 42%, H $\rightarrow$ L+3 38% |
| 6   | 3.48   | 0.065            | H-1 $\rightarrow$ L+3 39%, H $\rightarrow$ L+2 39% |
| 12  | 3.94   | 0.36             | H-3 $\rightarrow$ L+1 36%, H-2 $\rightarrow$ L 39% |

**Table S11.** Fragment contributions to select ground-state MOs of (CF<sub>3</sub>L2)<sub>2</sub>Zn in dichloromethane.

| MO     | E (eV) | Zn (%) | Phen 1 (%) |     |     | Pyrin 1 (%) |     | Phen 2 (%) |     |     | Pyrin 2 (%) |     |
|--------|--------|--------|------------|-----|-----|-------------|-----|------------|-----|-----|-------------|-----|
|        |        |        | full       | C=N | CF3 | full        | C-N | full       | C=N | CF3 | full        | C-N |
| LUMO+3 | -1.41  | 0      | 40         | 1   | 0   | 4           | 1   | 51         | 5   | 0   | 5           | 2   |
| LUMO+2 | -1.41  | 0      | 51         | 2   | 0   | 5           | 2   | 40         | 4   | 0   | 4           | 1   |
| LUMO+1 | -2.04  | 1      | 49         | 16  | 1   | 2           | 1   | 47         | 8   | 1   | 2           | 1   |
| LUMO   | -2.05  | 1      | 47         | 16  | 1   | 2           | 1   | 49         | 8   | 1   | 2           | 1   |
| HOMO   | -5.77  | 2      | 26         | 2   | 0   | 30          | 13  | 23         | 3   | 0   | 23          | 11  |
| HOMO-1 | -5.78  | 2      | 23         | 2   | 0   | 26          | 11  | 26         | 4   | 0   | 26          | 13  |
| HOMO-2 | -6.91  | 0      | 49         | 4   | 1   | 0           | 0   | 51         | 6   | 1   | 0           | 0   |
| HOMO-3 | -6.91  | 0      | 51         | 4   | 2   | 0           | 0   | 49         | 6   | 1   | 0           | 0   |

**Table S12.** TD-DFT predicted singlet-singlet vertical excitation energies, oscillator strengths ( $f_{osc} > 0.05$ ), and MO pair contributions (>10%) for (CF<sub>3</sub>L2)<sub>2</sub>Zn in diethyl ether. H=HOMO; L=LUMO

| No. | E (eV) | $f_{osc}$ | MO contributions       |
|-----|--------|-----------|------------------------|
| 1   | 2.79   | 0.21      | H-1→L 49%, H→L+1 49%   |
| 2   | 2.80   | 0.19      | H→L 52%, H-1→L+1 45%   |
| 5   | 3.45   | 0.16      | H-1→L+2 42%, H→L+3 37% |
| 6   | 3.45   | 0.056     | H-1→L+3 40%, H→L+2 38% |
| 10  | 3.80   | 0.056     | H-1→L+4 45%, H→L+5 35% |
| 12  | 3.94   | 0.33      | H-3→L+1 36%, H-2→L 39% |

**Table S13.** Fragment contributions to select ground-state MOs of (CF<sub>3</sub>L2)<sub>2</sub>Zn in diethyl ether.

| MO     | E (eV) | Zn (%) | Phen 1 (%) |     |     | Pyrin 1 (%) |     | Phen 2 (%) |     |     | Pyrin 2 (%) |     |
|--------|--------|--------|------------|-----|-----|-------------|-----|------------|-----|-----|-------------|-----|
|        |        |        | full       | C=N | CF3 | full        | C-N | full       | C=N | CF3 | full        | C-N |
| LUMO+3 | -1.43  | 0      | 40         | 1   | 0   | 4           | 1   | 52         | 2   | 0   | 4           | 1   |
| LUMO+2 | -1.43  | 0      | 52         | 2   | 0   | 5           | 1   | 39         | 1   | 0   | 3           | 1   |
| LUMO+1 | -2.07  | 1      | 50         | 17  | 1   | 2           | 1   | 36         | 15  | 1   | 1           | 1   |
| LUMO   | -2.08  | 1      | 45         | 16  | 1   | 2           | 1   | 40         | 17  | 1   | 2           | 1   |
| HOMO   | -5.76  | 2      | 24         | 2   | 0   | 33          | 12  | 25         | 2   | 0   | 25          | 13  |
| HOMO-1 | -5.76  | 2      | 26         | 2   | 0   | 35          | 12  | 23         | 2   | 0   | 23          | 11  |
| HOMO-2 | -6.94  | 0      | 49         | 4   | 1   | 1           | 0   | 47         | 4   | 1   | 1           | 0   |
| HOMO-3 | -6.94  | 0      | 50         | 4   | 1   | 1           | 0   | 47         | 4   | 1   | 1           | 0   |

**Table S14.** TD-DFT predicted singlet-singlet vertical excitation energies, oscillator strengths ( $f_{\text{osc}}$  > 0.05), and MO pair contributions (>10%) for (CF<sup>3</sup>L2)<sub>2</sub>Zn in toluene. H=HOMO; L=LUMO

| No. | E (eV) | $f_{\text{osc}}$ | MO contributions                  |
|-----|--------|------------------|-----------------------------------|
| 1   | 2.72   | 0.22             | H-1→L 49%, H→L+1 48%              |
| 2   | 2.73   | 0.20             | H→L 51%, H-1→L+1 46%              |
| 5   | 3.40   | 0.17             | H-1→L+2 42%, H→L+3 36%            |
| 6   | 3.40   | 0.052            | H-1→L+3 42%, H→L+2 38%            |
| 10  | 3.80   | 0.076            | H-1→L+4 50%, H→L+5 37%            |
| 12  | 3.91   | 0.36             | H-3→L+1 32%, H-2→L 25%, H-4→L 16% |

**Table S15.** Fragment contributions to select ground-state MOs of (CF<sup>3</sup>L2)<sub>2</sub>Zn in toluene.

| MO     | E (eV) | Zn (%) | Phen 1 (%) |     |     | Pyrim 1 (%) |     | Phen 2 (%) |     |     | Pyrim 2 (%) |     |
|--------|--------|--------|------------|-----|-----|-------------|-----|------------|-----|-----|-------------|-----|
|        |        |        | full       | C=N | CF3 | full        | C-N | full       | C=N | CF3 | full        | C-N |
| LUMO+3 | -1.47  | 0      | 40         | 1   | 0   | 3           | 1   | 53         | 2   | 0   | 4           | 1   |
| LUMO+2 | -1.47  | 0      | 54         | 2   | 0   | 4           | 1   | 39         | 1   | 0   | 3           | 1   |
| LUMO+1 | -2.11  | 1      | 48         | 16  | 1   | 1           | 1   | 38         | 16  | 1   | 1           | 1   |
| LUMO   | -2.12  | 1      | 48         | 16  | 1   | 1           | 1   | 38         | 16  | 1   | 1           | 1   |
| HOMO   | -5.75  | 2      | 45         | 3   | 0   | 44          | 22  | 5          | 1   | 0   | 5           | 3   |
| HOMO-1 | -5.75  | 2      | 5          | 1   | 0   | 5           | 2   | 42         | 3   | 0   | 39          | 21  |
| HOMO-2 | -6.97  | 0      | 48         | 4   | 1   | 2           | 0   | 46         | 4   | 1   | 1           | 0   |
| HOMO-3 | -6.98  | 0      | 49         | 4   | 1   | 1           | 0   | 46         | 4   | 1   | 1           | 0   |

**Table S16.** TD-DFT predicted singlet-singlet vertical excitation energies, oscillator strengths ( $f_{\text{osc}}$  > 0.05), and MO pair contributions (>10%) for (CF<sup>3</sup>L2)<sub>2</sub>Zn in n-hexane. H=HOMO; L=LUMO

| No. | E (eV) | $f_{\text{osc}}$ | MO contributions         |
|-----|--------|------------------|--------------------------|
| 1   | 2.69   | 0.20             | H-1→L 48%, H→L+1 48%     |
| 2   | 2.70   | 0.18             | H→L 51%, H-1→L+1 46%     |
| 5   | 3.39   | 0.15             | H-1→L+2 42%, H→L+3 36%   |
| 10  | 3.81   | 0.070            | H-1→L+4 50%, H→L+5 37%   |
| 12  | 3.92   | 0.32             | H-4→L+1 39%, H-5→L+1 35% |

**Table S17.** Fragment contributions to select ground-state MOs of (CF<sup>3</sup>L2)<sub>2</sub>Zn in n-hexane.

| MO     | E<br>(eV) | Zn<br>(%) | Phen 1 (%) |     |     | Pyrin 1 (%) |     | Phen 2 (%) |     |     | Pyrin 2 (%) |     |
|--------|-----------|-----------|------------|-----|-----|-------------|-----|------------|-----|-----|-------------|-----|
|        |           |           | full       | C=N | CF3 | full        | C-N | full       | C=N | CF3 | full        | C-N |
| LUMO+3 | -1.49     | 0         | 22         | 1   | 0   | 2           | 1   | 71         | 2   | 0   | 5           | 2   |
| LUMO+2 | -1.49     | 0         | 71         | 2   | 0   | 5           | 2   | 22         | 1   | 0   | 2           | 1   |
| LUMO+1 | -2.13     | 1         | 47         | 16  | 1   | 1           | 1   | 49         | 17  | 1   | 1           | 1   |
| LUMO   | -2.15     | 1         | 49         | 17  | 1   | 1           | 1   | 47         | 16  | 1   | 1           | 1   |
| HOMO   | -5.74     | 2         | 30         | 2   | 0   | 30          | 15  | 19         | 1   | 0   | 19          | 9   |
| HOMO-1 | -5.75     | 2         | 19         | 1   | 0   | 19          | 10  | 29         | 2   | 0   | 30          | 15  |
| HOMO-2 | -7.00     | 0         | 41         | 3   | 1   | 8           | 1   | 43         | 4   | 1   | 7           | 1   |
| HOMO-3 | -7.00     | 0         | 47         | 4   | 1   | 3           | 0   | 45         | 4   | 1   | 5           | 0   |

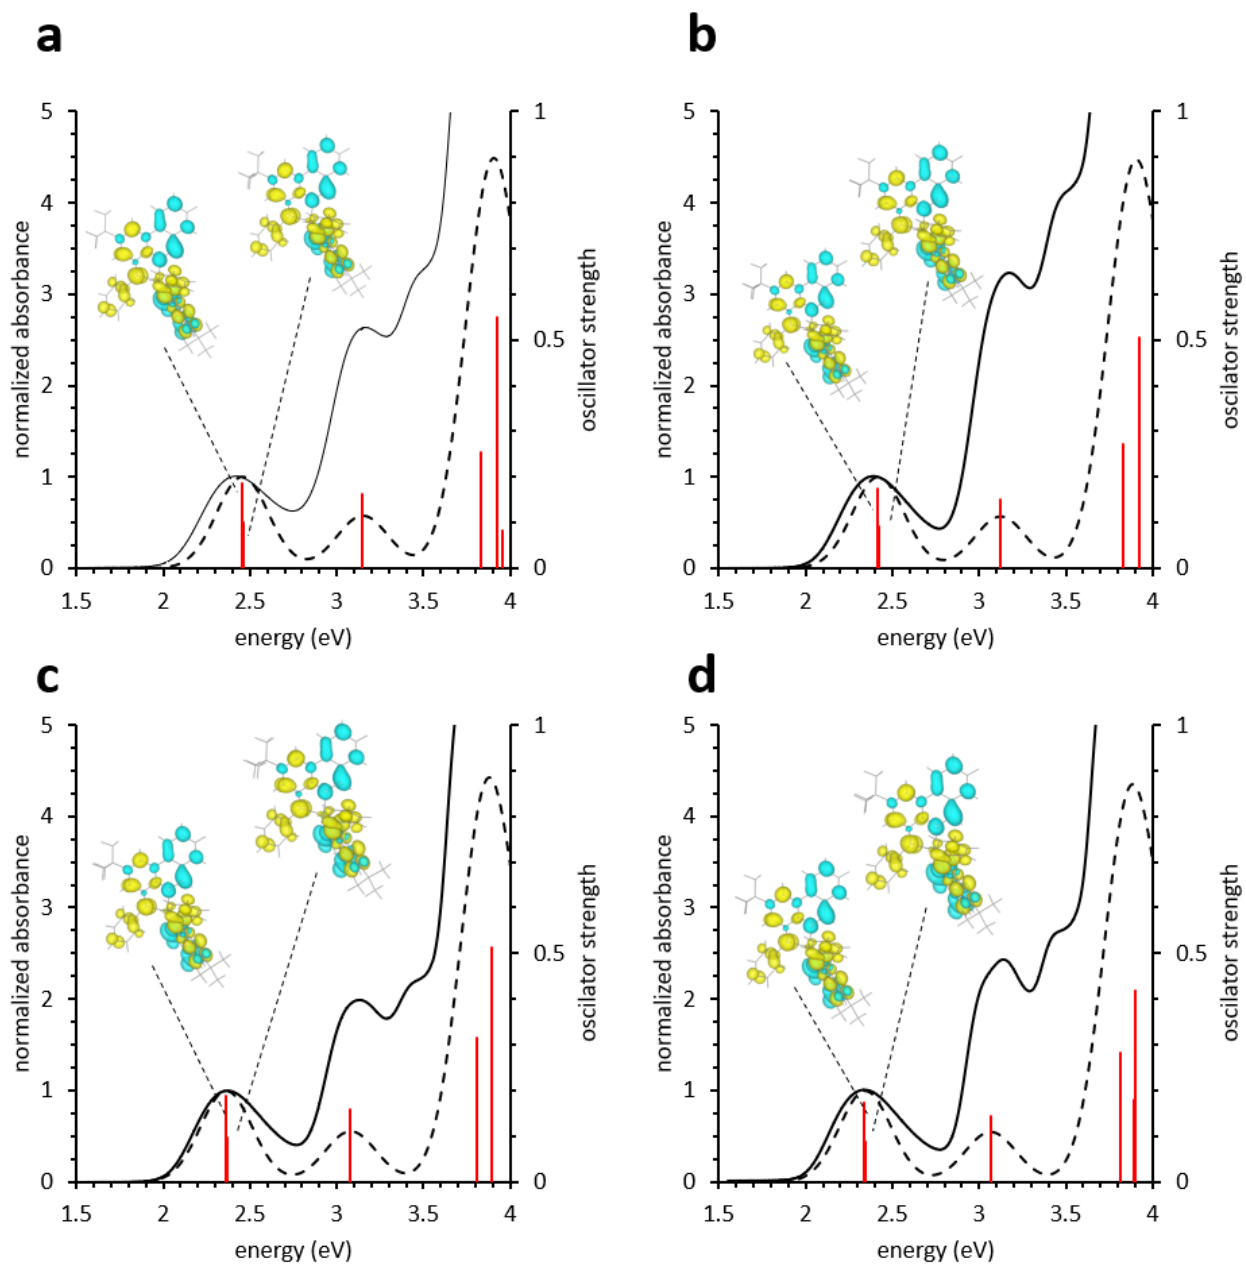

**Figure S19.** Normalized experimental UV-Vis absorption spectrum (solid trace), normalized TD-DFT simulated spectrum (dotted trace, FWHM = 0.35 eV), predicted singlet-singlet vertical excitation energies ( $f_{\text{osc}} > 0.08$ ), and electron-hole density maps (yellow = hole; blue = electron; isosurface value = 0.001) for the lowest-energy vertical electronic transitions of  $(t\text{BuL3})_2\text{Zn}$  (a) dichloromethane, (b) diethyl ether, (c) toluene, and (d) n-hexane.

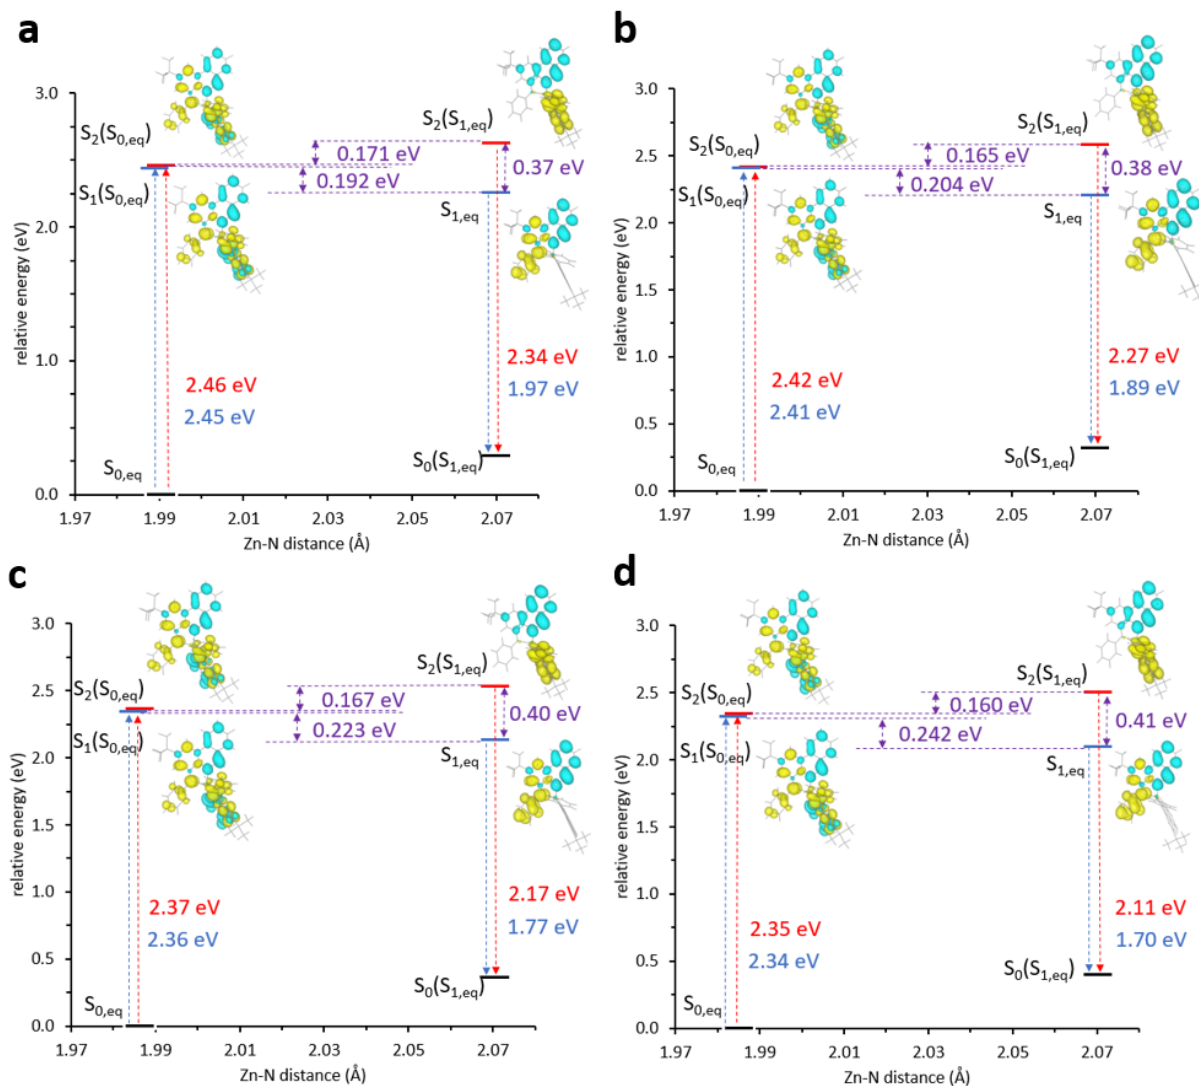

**Figure S20.** Jablonski diagram in the singlet manifold for  $(t\text{BuL3})_2\text{Zn}$  along the Zn-N<sub>phenyl</sub> bond at the equilibrium  $S_0$  and  $S_1$  optimized geometries, with electron-hole density maps (yellow = hole; blue = electron; isosurface value = 0.001) in (a) dichloromethane, (b) diethyl ether, (c) toluene, and (d) n-hexane.

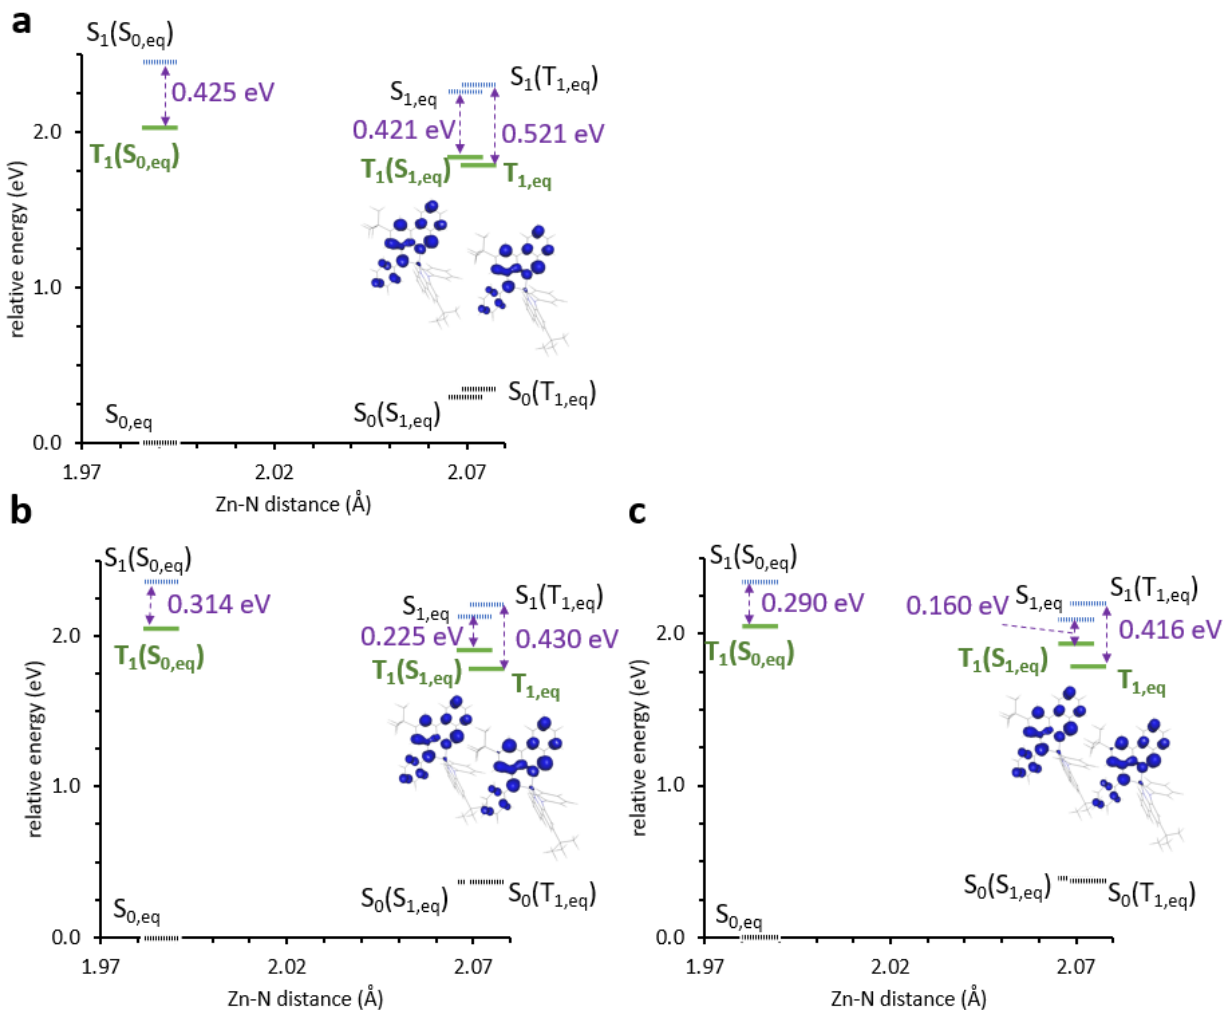

**Figure S21.** Jablonski diagram with  $T_1$  states for  $(^t\text{BuL3})_2\text{Zn}$  along the Zn-N<sub>phenyl</sub> bond at the equilibrium  $S_0$ ,  $S_1$ , and  $T_1$  optimized geometries, with spin density maps (isosurface value = 0.004) in (a) dichloromethane, (b) toluene, and (c) n-hexane. Diethyl ether is omitted due to complications with calculations.

**Table S18.** TD-DFT predicted singlet-singlet vertical excitation energies, oscillator strengths ( $f_{\text{osc}} > 0.08$ ), and MO pair contributions (>10%) for (<sup>t</sup>BuL3)<sub>2</sub>Zn in dichloromethane. H=HOMO; L=LUMO

| No. | E (eV) | $f_{\text{osc}}$ | MO contributions                    |
|-----|--------|------------------|-------------------------------------|
| 1   | 2.45   | 0.19             | H→L 58%, H-1→L+1 40%                |
| 2   | 2.46   | 0.099            | H-1→L 57%, H→L+1 42%                |
| 5   | 3.15   | 0.16             | H→L+2 48%, H-1→L+3 46%              |
| 9   | 3.83   | 0.16             | H-3→L 34%, H-2→L+1 30%              |
| 10  | 3.83   | 0.25             | H-2→L 34%, H-3→L+1 29%              |
| 11  | 3.92   | 0.26             | H-1→L+4 53%, H→L+5 38%              |
| 12  | 3.93   | 0.55             | H→L+4 58%, H-1→L+5 34%              |
| 14  | 3.96   | 0.082            | H→L+7 38%, H-1→L+6 27%, H-1→L+7 20% |

**Table S19.** Fragment contributions to select ground-state MOs of (<sup>t</sup>BuL3)<sub>2</sub>Zn in dichloromethane.

| MO     | E (eV) | Zn (%) | Phenan 1 (%) |     |     | Phenyl 1 (%) |     | Phenan 2 (%) |     |     | Phenyl 2 (%) |     |
|--------|--------|--------|--------------|-----|-----|--------------|-----|--------------|-----|-----|--------------|-----|
|        |        |        | full         | C=N | CF3 | full         | C-N | full         | C=N | CF3 | full         | C-N |
| LUMO+3 | -1.19  | 0      | 47           | 2   | 1   | 3            | 1   | 48           | 2   | 1   | 3            | 1   |
| LUMO+2 | -1.20  | 0      | 48           | 2   | 1   | 2            | 1   | 47           | 2   | 1   | 2            | 1   |
| LUMO+1 | -1.83  | 2      | 48           | 17  | 1   | 1            | 1   | 47           | 17  | 1   | 1            | 1   |
| LUMO   | -1.86  | 2      | 48           | 17  | 1   | 1            | 1   | 46           | 17  | 1   | 1            | 1   |
| HOMO   | -5.18  | 2      | 27           | 2   | 1   | 27           | 15  | 22           | 1   | 0   | 22           | 13  |
| HOMO-1 | -5.19  | 3      | 21           | 2   | 0   | 23           | 12  | 25           | 2   | 0   | 28           | 15  |
| HOMO-2 | -6.61  | 0      | 50           | 5   | 2   | 1            | 1   | 48           | 5   | 2   | 1            | 0   |
| HOMO-3 | -6.62  | 0      | 49           | 5   | 2   | 1            | 0   | 49           | 5   | 2   | 1            | 0   |

**Table S20.** TD-DFT predicted singlet-singlet vertical excitation energies, oscillator strengths ( $f_{\text{osc}} > 0.08$ ), and MO pair contributions (>10%) for (<sup>t</sup>BuL3)<sub>2</sub>Zn in diethyl ether. H=HOMO; L=LUMO

| No. | E (eV) | $f_{\text{osc}}$ | MO contributions       |
|-----|--------|------------------|------------------------|
| 1   | 2.41   | 0.17             | H→L 58%, H-1→L+1 40%   |
| 2   | 2.42   | 0.09             | H-1→L 57%, H→L+1 42%   |
| 5   | 3.12   | 0.15             | H→L+2 49%, H-1→L+3 46% |
| 9   | 3.83   | 0.12             | H-3→L 41%, H-2→L+1 35% |
| 10  | 3.83   | 0.27             | H-2→L 40%, H-3→L+1 34% |
| 11  | 3.92   | 0.23             | H-1→L+4 55%, H→L+5 36% |
| 12  | 3.92   | 0.51             | H→L+4 59%, H-1→L+5 32% |

**Table S21.** Fragment contributions to select ground-state MOs of (<sup>t</sup>BuL3)<sub>2</sub>Zn in diethyl ether.

| MO     | E (eV) | Zn (%) | Phenan 1 (%) |     |     | Phenyl 1 (%) |     | Phenan 2 (%) |     |     | Phenyl 2 (%) |     |
|--------|--------|--------|--------------|-----|-----|--------------|-----|--------------|-----|-----|--------------|-----|
|        |        |        | full         | C=N | CF3 | full         | C-N | full         | C=N | CF3 | full         | C-N |
| LUMO+3 | -1.20  | 0      | 47           | 2   | 1   | 2            | 1   | 44           | 2   | 1   | 2            | 1   |
| LUMO+2 | -1.20  | 0      | 48           | 2   | 1   | 2            | 1   | 43           | 2   | 1   | 2            | 1   |
| LUMO+1 | -1.84  | 2      | 48           | 17  | 1   | 1            | 1   | 47           | 17  | 1   | 1            | 1   |
| LUMO   | -1.87  | 2      | 47           | 17  | 1   | 1            | 1   | 46           | 17  | 1   | 1            | 1   |
| HOMO   | -5.15  | 2      | 25           | 2   | 0   | 25           | 14  | 22           | 2   | 0   | 25           | 14  |
| HOMO-1 | -5.16  | 3      | 23           | 2   | 0   | 25           | 14  | 21           | 2   | 0   | 26           | 14  |
| HOMO-2 | -6.61  | 0      | 48           | 6   | 2   | 2            | 1   | 41           | 5   | 2   | 2            | 1   |
| HOMO-3 | -6.61  | 0      | 48           | 5   | 2   | 2            | 1   | 42           | 5   | 2   | 2            | 1   |

**Table S22.** TD-DFT predicted singlet-singlet vertical excitation energies, oscillator strengths ( $f_{\text{osc}} > 0.08$ ), and MO pair contributions (>10%) for (<sup>t</sup>BuL3)<sub>2</sub>Zn in toluene. H=HOMO; L=LUMO

| No. | E (eV) | $f_{\text{osc}}$ | MO contributions                                |
|-----|--------|------------------|-------------------------------------------------|
| 1   | 2.36   | 0.19             | H→L 59%, H-1→L+1 40%                            |
| 2   | 2.37   | 0.097            | H-1→L 56%, H→L+1 42%                            |
| 5   | 3.08   | 0.16             | H→L+2 50%, H-1→L+3 46%                          |
| 9   | 3.81   | 0.13             | H-3→L 37%, H-2→L+1 28%, H-4→L+1 14%, H-5→L 10%  |
| 10  | 3.81   | 0.32             | H-2→L 33%, H-3→L+1 31%, H-4→L 15%, H-5→L+1 10%, |
| 11  | 3.89   | 0.23             | H-1→L+4 55%, H→L+5 35%                          |
| 12  | 3.89   | 0.51             | H→L+4 59%, H-1→L+5 31%                          |

**Table S23.** Fragment contributions to select ground-state MOs of (<sup>t</sup>BuL3)<sub>2</sub>Zn in toluene.

| MO     | E (eV) | Zn (%) | Phenan 1 (%) |     |     | Phenyl 1 (%) |     | Phenan 2 (%) |     |     | Phenyl 2 (%) |     |
|--------|--------|--------|--------------|-----|-----|--------------|-----|--------------|-----|-----|--------------|-----|
|        |        |        | full         | C=N | CF3 | full         | C-N | full         | C=N | CF3 | full         | C-N |
| LUMO+3 | -1.21  | 0      | 48           | 2   | 1   | 2            | 1   | 47           | 2   | 1   | 2            | 1   |
| LUMO+2 | -1.21  | 0      | 47           | 2   | 1   | 2            | 1   | 48           | 2   | 1   | 2            | 1   |
| LUMO+1 | -1.86  | 2      | 48           | 17  | 1   | 1            | 1   | 48           | 17  | 1   | 1            | 1   |
| LUMO   | -1.89  | 2      | 48           | 17  | 1   | 1            | 1   | 47           | 17  | 1   | 1            | 1   |
| HOMO   | -5.11  | 2      | 24           | 2   | 0   | 25           | 14  | 24           | 2   | 0   | 25           | 14  |
| HOMO-1 | -5.13  | 3      | 23           | 2   | 0   | 25           | 14  | 23           | 2   | 0   | 25           | 14  |
| HOMO-2 | -6.61  | 1      | 43           | 5   | 2   | 6            | 2   | 43           | 6   | 2   | 6            | 2   |
| HOMO-3 | -6.62  | 1      | 46           | 6   | 3   | 4            | 1   | 46           | 6   | 3   | 4            | 1   |

**Table S24.** TD-DFT predicted singlet-singlet vertical excitation energies, oscillator strengths ( $f_{\text{osc}}$  > 0.08), and MO pair contributions (>10%) for (<sup>t</sup>BuL3)<sub>2</sub>Zn in n-hexane. H=HOMO; L=LUMO

| No. | E (eV) | $f_{\text{osc}}$ | MO contributions                               |
|-----|--------|------------------|------------------------------------------------|
| 1   | 2.34   | 0.17             | H→L 60%, H-1→L+1 39%                           |
| 2   | 2.35   | 0.088            | H-1→L 56%, H→L+1 42%                           |
| 5   | 3.07   | 0.14             | H→L+2 50%, H-1→L+3 46%                         |
| 9   | 3.81   | 0.11             | H-3→L 31%, H-4→L+1 25%, H-5→L 17%, H-2→L+1 17% |
| 10  | 3.82   | 0.28             | H-4→L 28%, H-3→L+1 24%, H-2→L 20%, H-5→L+1 16% |
| 11  | 3.90   | 0.18             | H-1→L+4 54%, H→L+5 34%                         |
| 12  | 3.90   | 0.42             | H→L+4 57%, H-1→L+5 29%                         |

**Table S25.** Fragment contributions to select ground-state MOs of (<sup>t</sup>BuL3)<sub>2</sub>Zn in n-hexane.

| MO     | E (eV) | Zn (%) | Phenan 1 (%) |     |     | Phenyl 1 (%) |     | Phenan 2 (%) |     |     | Phenyl 2 (%) |     |
|--------|--------|--------|--------------|-----|-----|--------------|-----|--------------|-----|-----|--------------|-----|
|        |        |        | full         | C=N | CF3 | full         | C-N | full         | C=N | CF3 | full         | C-N |
| LUMO+3 | -1.22  | 0      | 48           | 2   | 1   | 2            | 1   | 47           | 2   | 3   | 2            | 1   |
| LUMO+2 | -1.22  | 0      | 48           | 2   | 1   | 2            | 1   | 48           | 2   | 4   | 2            | 1   |
| LUMO+1 | -1.87  | 2      | 48           | 16  | 1   | 1            | 1   | 48           | 17  | 2   | 1            | 1   |
| LUMO   | -1.90  | 2      | 48           | 16  | 1   | 1            | 1   | 47           | 16  | 2   | 1            | 1   |
| HOMO   | -5.10  | 2      | 24           | 2   | 0   | 25           | 14  | 24           | 2   | 2   | 28           | 14  |
| HOMO-1 | -5.11  | 3      | 23           | 2   | 0   | 25           | 14  | 23           | 2   | 2   | 28           | 14  |
| HOMO-2 | -6.61  | 1      | 37           | 5   | 2   | 12           | 4   | 38           | 5   | 4   | 15           | 4   |
| HOMO-3 | -6.61  | 1      | 43           | 6   | 3   | 6            | 2   | 44           | 6   | 4   | 8            | 2   |

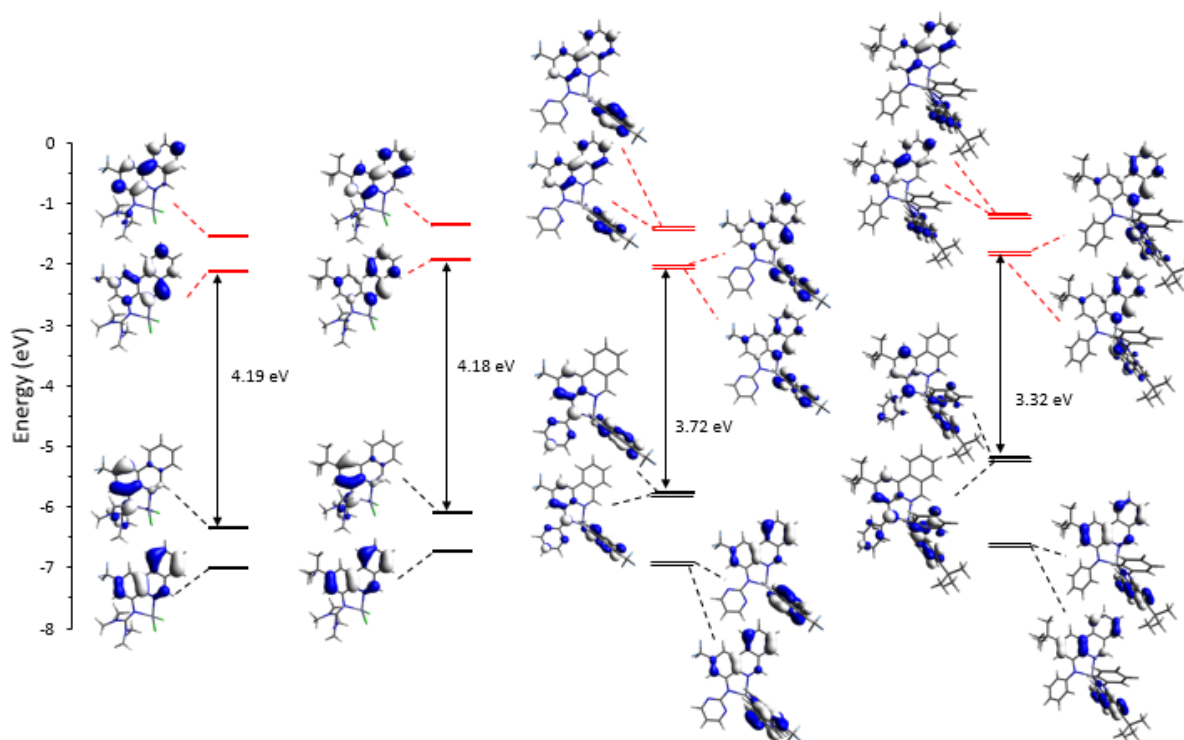

**Figure S22.** Ground-state frontier molecular orbital energy level diagram and isosurfaces (isovalue = 0.04) of the four complexes calculated in dichloromethane. From left to right:  $(\text{CF}_3\text{L1})\text{ZnCl}_2$  (HOMO – 1 to LUMO +1),  $(t\text{BuL1})\text{ZnCl}_2$  (HOMO – 1 to LUMO +1),  $(\text{CF}_3\text{L2})_2\text{Zn}$  (HOMO – 3 to LUMO +3),  $(t\text{BuL3})_2\text{Zn}$  (HOMO – 3 to LUMO +3).

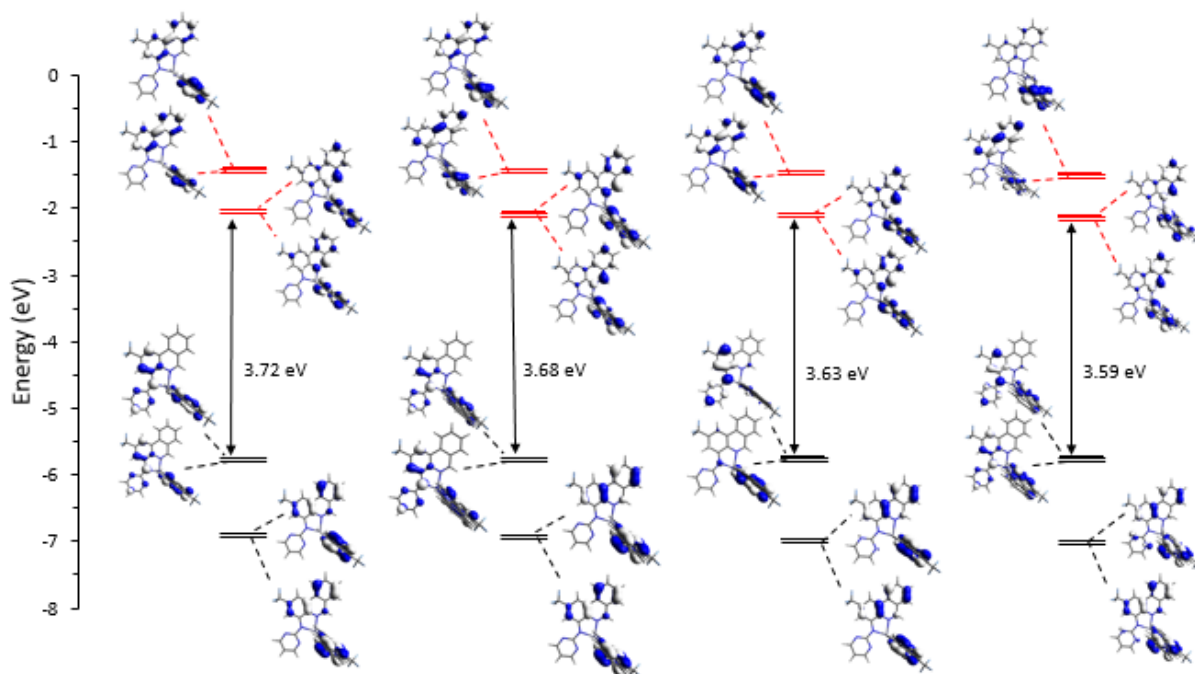

**Figure S23.** Ground-state frontier molecular orbital energy level diagram and isosurfaces (isovalue = 0.04) of  $(\text{CF}_3\text{L2})_2\text{Zn}$  (HOMO – 3 to LUMO +3). From left to right: dichloromethane, diethyl ether, toluene, n-hexane.

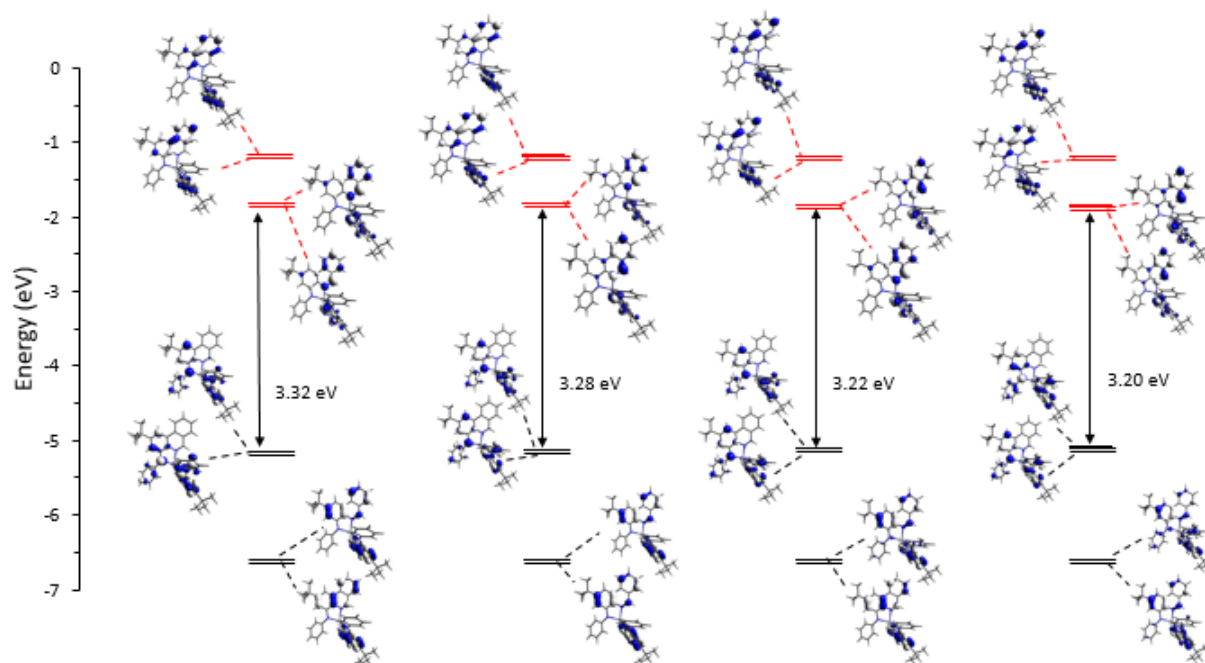

**Figure S24.** Ground-state frontier molecular orbital energy level diagram and isosurfaces (isovalue = 0.04) of  $(t\text{BuL3})_2\text{Zn}$  (HOMO - 3 to LUMO +3). From left to right: dichloromethane, diethyl ether, toluene, n-hexane.

**Table S26.** Spin-orbit coupling matrix elements for ( $\text{CF}_3\text{L2}$ ) $_2\text{Zn}$  between the five lowest-lying excited triplet states with the ground state and two lowest-lying excited singlet states calculated in dichloromethane at the optimized ground state geometry.

| Root |   | $\langle \text{T}   \text{H}_{\text{SO}}   \text{S} \rangle$ (Re, Im) $\text{cm}^{-1}$ |            |            |
|------|---|----------------------------------------------------------------------------------------|------------|------------|
| T    | S | Z                                                                                      | X          | Y          |
| 1    | 0 | (0, -0.08)                                                                             | (0, 0.12)  | (0, 1.39)  |
| 1    | 1 | (0, 0.04)                                                                              | (0, -0.23) | (0, -0.04) |
| 1    | 2 | (0, 0.01)                                                                              | (0, -0.06) | (0, -0.34) |
| 2    | 0 | (0, -0.18)                                                                             | (0, 1.1)   | (0, -0.18) |
| 2    | 1 | (0, 0)                                                                                 | (0, 0.05)  | (0, -0.32) |
| 2    | 2 | (0, 0.04)                                                                              | (0, -0.38) | (0, 0.04)  |
| 3    | 0 | (0, 0)                                                                                 | (0, 0.08)  | (0, 0.1)   |
| 3    | 1 | (0, 0.05)                                                                              | (0, 0.1)   | (0, 0.02)  |
| 3    | 2 | (0, 0.03)                                                                              | (0, 0.1)   | (0, 0.02)  |
| 4    | 0 | (0, 0.02)                                                                              | (0, 0.34)  | (0, -0.04) |
| 4    | 1 | (0, -0.01)                                                                             | (0, -0.02) | (0, 0.25)  |
| 4    | 2 | (0, 0.24)                                                                              | (0, 0.33)  | (0, -0.03) |
| 5    | 0 | (0, -0.05)                                                                             | (0, 0.36)  | (0, -0.47) |
| 5    | 1 | (0, -0.3)                                                                              | (0, -1.57) | (0, -0.1)  |
| 5    | 2 | (0, 0.79)                                                                              | (0, 0.37)  | (0, 0.19)  |

**Table S27.** Spin-orbit coupling matrix elements for ( $\text{CF}_3\text{L2}$ ) $_2\text{Zn}$  between the five lowest-lying excited triplet states with the ground state and two lowest-lying excited singlet states calculated in diethyl ether at the optimized ground state geometry.

| Root |   | $\langle \text{T}   \text{H}_{\text{SO}}   \text{S} \rangle$ (Re, Im) $\text{cm}^{-1}$ |               |                |
|------|---|----------------------------------------------------------------------------------------|---------------|----------------|
| T    | S | Z                                                                                      | X             | Y              |
| 1    | 0 | (0.00, -0.04)                                                                          | (0.00, -0.10) | (-0.00, 1.49)  |
| 1    | 1 | (0.00, -0.04)                                                                          | (0.00, 0.23)  | (-0.00, -0.03) |
| 1    | 2 | (0.00, -0.00)                                                                          | (0.00, -0.01) | (-0.00, 0.33)  |
| 2    | 0 | (0.00, 0.20)                                                                           | (0.00, -1.17) | (-0.00, -0.11) |
| 2    | 1 | (0.00, 0.00)                                                                           | (0.00, 0.01)  | (-0.00, -0.31) |
| 2    | 2 | (0.00, 0.05)                                                                           | (0.00, -0.39) | (-0.00, -0.04) |
| 3    | 0 | (0.00, 0.01)                                                                           | (0.00, 0.26)  | (-0.00, -0.10) |
| 3    | 1 | (0.00, -0.02)                                                                          | (0.00, 0.06)  | (-0.00, -0.19) |
| 3    | 2 | (0.00, -0.22)                                                                          | (0.00, -0.25) | (-0.00, 0.18)  |
| 4    | 0 | (0.00, 0.00)                                                                           | (0.00, -0.32) | (-0.00, -0.07) |
| 4    | 1 | (0.00, -0.05)                                                                          | (0.00, 0.03)  | (-0.00, 0.17)  |
| 4    | 2 | (0.00, 0.22)                                                                           | (0.00, 0.28)  | (-0.00, 0.19)  |
| 5    | 0 | (0.00, 0.07)                                                                           | (0.00, -0.40) | (-0.00, 0.49)  |
| 5    | 1 | (0.00, -0.30)                                                                          | (0.00, -1.56) | (-0.00, -0.11) |
| 5    | 2 | (0.00, 0.91)                                                                           | (0.00, 0.38)  | (-0.00, 0.20)  |

**Table S28.** Spin-orbit coupling matrix elements for (<sup>CF3</sup>**L2**)<sub>2</sub>Zn between the five lowest-lying excited triplet states with the ground state and two lowest-lying excited singlet states calculated in toluene at the optimized ground state geometry.

| Root |   | <T H <sub>so</sub>  S> (Re, Im) cm <sup>-1</sup> |               |                |
|------|---|--------------------------------------------------|---------------|----------------|
| T    | S | Z                                                | X             | Y              |
| 1    | 0 | (0.00, -0.01)                                    | (0.00, 0.39)  | (-0.00, -1.53) |
| 1    | 1 | (0.00, -0.05)                                    | (0.00, 0.21)  | (-0.00, -0.10) |
| 1    | 2 | (0.00, -0.01)                                    | (0.00, 0.09)  | (-0.00, -0.29) |
| 2    | 0 | (0.00, 0.22)                                     | (0.00, -1.20) | (-0.00, -0.48) |
| 2    | 1 | (0.00, -0.01)                                    | (0.00, 0.02)  | (-0.00, 0.27)  |
| 2    | 2 | (0.00, 0.05)                                     | (0.00, -0.35) | (-0.00, -0.12) |
| 3    | 0 | (0.00, 0.01)                                     | (0.00, -0.35) | (-0.00, 0.08)  |
| 3    | 1 | ( 0.00, -0.00)                                   | (0.00, 0.03)  | (-0.00, -0.21) |
| 3    | 2 | ( 0.00, 0.36)                                    | (0.00, 0.34)  | (-0.00, -0.16) |
| 4    | 0 | ( 0.00, -0.02)                                   | (0.00, 0.36)  | (-0.00, 0.07)  |
| 4    | 1 | (0.00, -0.08)                                    | (0.00, -0.04) | (-0.00, 0.14)  |
| 4    | 2 | (0.00, -0.32)                                    | (0.00, -0.31) | (-0.00, -0.22) |
| 5    | 0 | (0.00, -0.08)                                    | ( 0.00, 0.43) | (-0.00, -0.52) |
| 5    | 1 | (0.00, -0.32)                                    | (0.00, -1.54) | (-0.00, -0.13) |
| 5    | 2 | (0.00, -1.01)                                    | (0.00, -0.39) | (-0.00, -0.19) |

**Table S29.** Spin-orbit coupling matrix elements for (<sup>CF3</sup>**L2**)<sub>2</sub>Zn between the five lowest-lying excited triplet states with the ground state and two lowest-lying excited singlet states calculated in n-hexane at the optimized ground state geometry.

| Root |   | <T H <sub>so</sub>  S> (Re, Im) cm <sup>-1</sup> |               |                |
|------|---|--------------------------------------------------|---------------|----------------|
| T    | S | Z                                                | X             | Y              |
| 1    | 0 | (0.00, -0.03)                                    | (0.00, 0.51)  | (-0.00, -1.54) |
| 1    | 1 | (0.00, -0.05)                                    | (0.00, 0.21)  | (-0.00, -0.14) |
| 1    | 2 | (0.00, -0.01)                                    | (0.00, 0.12)  | (-0.00, -0.27) |
| 2    | 0 | (0.00, 0.23)                                     | (0.00, 0.23)  | (-0.00, -0.63) |
| 2    | 1 | (0.00, -0.02)                                    | (0.00, 0.03)  | (-0.00, 0.26)  |
| 2    | 2 | (0.00, 0.05)                                     | (0.00, -0.35) | (-0.00, -0.15) |
| 3    | 0 | ( 0.00, -0.03)                                   | (0.00, 0.42)  | (-0.00, -0.06) |
| 3    | 1 | (0.00, -0.02)                                    | (0.00, -0.02) | (-0.00, 0.22)  |
| 3    | 2 | (0.00, -0.51)                                    | (0.00, -0.42) | (-0.00, 0.14)  |
| 4    | 0 | (0.00, 0.03)                                     | (0.00, -0.39) | (-0.00, -0.06) |
| 4    | 1 | (0.00, 0.11)                                     | (0.00, 0.11)  | (-0.00, -0.11) |
| 4    | 2 | (0.00, 0.42)                                     | (0.00, 0.34)  | (-0.00, 0.24)  |
| 5    | 0 | (0.00, 0.08)                                     | (0.00, -0.41) | (-0.00, 0.55)  |
| 5    | 1 | (0.00, 0.32)                                     | (0.00, 1.54)  | (-0.00, 0.13)  |
| 5    | 2 | (0.00, 0.99)                                     | (0.00, 0.34)  | ( -0.00, 0.18) |

**Table S30.** Spin-orbit coupling matrix elements for (<sup>t</sup>BuL3)<sub>2</sub>Zn between the five lowest-lying excited triplet states with the ground state and two lowest-lying excited singlet states calculated in dichloromethane at the optimized ground state geometry.

| Root |   | <T H <sub>so</sub>  S> (Re, Im) cm <sup>-1</sup> |               |                |
|------|---|--------------------------------------------------|---------------|----------------|
| T    | S | Z                                                | X             | Y              |
| 1    | 0 | (0.00, -1.47)                                    | (0.00, 0.91)  | (-0.00, -0.23) |
| 1    | 1 | (0.00, -0.02)                                    | (0.00, 0.09)  | (-0.00, 0.03)  |
| 1    | 2 | (0.00, -0.13)                                    | (0.00, 0.27)  | (-0.00, -0.24) |
| 2    | 0 | (0.00, 0.54)                                     | (0.00, 2.48)  | (-0.00, -0.65) |
| 2    | 1 | (0.00, -0.04)                                    | (0.00, -0.01) | (-0.00, -0.03) |
| 2    | 2 | (0.00, 0.05)                                     | (0.00, 0.77)  | (-0.00, -0.67) |
| 3    | 0 | (0.00, 1.42)                                     | (0.00, 0.16)  | (-0.00, 0.03)  |
| 3    | 1 | (0.00, 0.02)                                     | (0.00, 3.24)  | (-0.00, 0.05)  |
| 3    | 2 | (0.00, -0.25)                                    | (0.00, -0.17) | (-0.00, 0.24)  |
| 4    | 0 | (0.00, 0.04)                                     | (0.00, -3.53) | (-0.00, -0.61) |
| 4    | 1 | (0.00, 0.01)                                     | (0.00, 0.20)  | (-0.00, -0.13) |
| 4    | 2 | (0.00, -0.03)                                    | (0.00, 1.51)  | (-0.00, -4.75) |
| 5    | 0 | (0.00, -0.01)                                    | (0.00, 0.56)  | (-0.00, -0.55) |
| 5    | 1 | (0.00, -0.33)                                    | (0.00, 0.20)  | (-0.00, -0.10) |
| 5    | 2 | (0.00, 0.05)                                     | (0.00, 0.45)  | (-0.00, -1.15) |

**Table S31.** Spin-orbit coupling matrix elements for (<sup>t</sup>BuL3)<sub>2</sub>Zn between the five lowest-lying excited triplet states with the ground state and two lowest-lying excited singlet states calculated in diethyl ether at the optimized ground state geometry.

| Root |   | <T H <sub>so</sub>  S> (Re, Im) cm <sup>-1</sup> |               |                |
|------|---|--------------------------------------------------|---------------|----------------|
| T    | S | Z                                                | X             | Y              |
| 1    | 0 | (0.00, 1.56)                                     | (0.00, 0.42)  | (-0.00, -0.11) |
| 1    | 1 | (0.00, 0.01)                                     | (0.00, 0.07)  | (-0.00, 0.08)  |
| 1    | 2 | (0.00, 0.13)                                     | (0.00, 0.12)  | (-0.00, -0.11) |
| 2    | 0 | (0.00, 0.24)                                     | (0.00, -2.67) | (-0.00, 0.71)  |
| 2    | 1 | (0.00, -0.04)                                    | (0.00, 0.01)  | (-0.00, 0.01)  |
| 2    | 2 | (0.00, 0.02)                                     | (0.00, -0.80) | (-0.00, 0.71)  |
| 3    | 0 | (0.00, 1.37)                                     | (0.00, 0.04)  | (-0.00, 0.01)  |
| 3    | 1 | (0.00, -0.00)                                    | (0.00, -3.40) | (-0.00, 0.08)  |
| 3    | 2 | (0.00, -0.20)                                    | (0.00, -0.01) | (-0.00, 0.05)  |
| 4    | 0 | (0.00, -0.01)                                    | (0.00, 3.49)  | (-0.00, 0.70)  |
| 4    | 1 | (0.00, -0.04)                                    | (0.00, 0.03)  | (-0.00, 0.01)  |
| 4    | 2 | (0.00, 0.00)                                     | (0.00, -1.50) | (-0.00, 4.87)  |
| 5    | 0 | (0.00, -0.02)                                    | (0.00, -0.84) | (-0.00, 0.49)  |
| 5    | 1 | (0.00, -0.31)                                    | (0.00, -0.05) | (-0.00, 0.03)  |
| 5    | 2 | (0.00, 0.02)                                     | (0.00, -0.30) | (-0.00, 0.68)  |

**Table S32.** Spin-orbit coupling matrix elements for (<sup>t</sup>BuL3)<sub>2</sub>Zn between the five lowest-lying excited triplet states with the ground state and two lowest-lying excited singlet states calculated in toluene at the optimized ground state geometry.

| Root |   | <T H <sub>so</sub>  S> (Re, Im) cm <sup>-1</sup> |               |                |
|------|---|--------------------------------------------------|---------------|----------------|
| T    | S | Z                                                | X             | Y              |
| 1    | 0 | (0.00, 0.06)                                     | (0.00, -2.78) | (-0.00, 0.72)  |
| 1    | 1 | (0.00, -0.04)                                    | (0.00, 0.00)  | (-0.00, 0.01)  |
| 1    | 2 | (0.00, -0.00)                                    | (0.00, 0.78)  | (-0.00, -0.70) |
| 2    | 0 | (0.00, 1.59)                                     | (0.00, 0.10)  | (-0.00, -0.03) |
| 2    | 1 | (0.00, 0.00)                                     | (0.00, 0.04)  | (-0.00, 0.16)  |
| 2    | 2 | (0.00, -0.13)                                    | (0.00, -0.03) | (-0.00, 0.03)  |
| 3    | 0 | (0.00, 1.33)                                     | (0.00, -0.01) | (-0.00, -0.00) |
| 3    | 1 | (0.00, 0.00)                                     | (0.00, -3.52) | (-0.00, 0.17)  |
| 3    | 2 | (0.00, 0.18)                                     | (0.00, -0.00) | (-0.00, 0.02)  |
| 4    | 0 | (0.00, 0.01)                                     | (0.00, 3.45)  | (-0.00, 0.83)  |
| 4    | 1 | (0.00, -0.06)                                    | (0.00, -0.01) | (-0.00, -0.00) |
| 4    | 2 | (0.00, 0.00)                                     | (0.00, 1.51)  | (-0.00, -4.91) |
| 5    | 0 | (0.00, -0.01)                                    | (0.00, 0.96)  | (-0.00, -0.44) |
| 5    | 1 | (0.00, 0.28)                                     | (0.00, -0.02) | (-0.00, 0.01)  |
| 5    | 2 | (0.00, -0.01)                                    | (0.00, -0.22) | (-0.00, 0.40)  |

**Table S33.** Spin-orbit coupling matrix elements for (<sup>t</sup>BuL3)<sub>2</sub>Zn between the five lowest-lying excited triplet states with the ground state and two lowest-lying excited singlet states calculated in n-hexane at the optimized ground state geometry.

| Root |   | <T H <sub>so</sub>  S> (Re, Im) cm <sup>-1</sup> |               |                |
|------|---|--------------------------------------------------|---------------|----------------|
| T    | S | Z                                                | X             | Y              |
| 1    | 0 | (0.00, -0.08)                                    | (0.00, 2.83)  | (-0.00, -0.73) |
| 1    | 1 | (0.00, -0.04)                                    | (0.00, 0.00)  | (-0.00, 0.01)  |
| 1    | 2 | (0.00, -0.01)                                    | (0.00, 0.79)  | (-0.00, -0.71) |
| 2    | 0 | (0.00, -1.59)                                    | (0.00, -0.15) | (-0.00, 0.04)  |
| 2    | 1 | (0.00, 0.00)                                     | (0.00, 0.03)  | (-0.00, 0.21)  |
| 2    | 2 | (0.00, -0.13)                                    | (0.00, -0.04) | (-0.00, 0.04)  |
| 3    | 0 | (0.00, -1.31)                                    | (0.00, 0.01)  | (-0.00, 0.00)  |
| 3    | 1 | (0.00, 0.00)                                     | (0.00, -3.55) | (-0.00, 0.20)  |
| 3    | 2 | (0.00, 0.16)                                     | (0.00, 0.00)  | (-0.00, 0.01)  |
| 4    | 0 | (0.00, 0.00)                                     | (0.00, 3.43)  | (-0.00, 0.91)  |
| 4    | 1 | (0.00, 0.07)                                     | (0.00, 0.01)  | (-0.00, 0.01)  |
| 4    | 2 | (0.00, -0.00)                                    | (0.00, -1.51) | (-0.00, 4.93)  |
| 5    | 0 | (0.00, 0.00)                                     | (0.00, -1.51) | (-0.00, 0.43)  |
| 5    | 1 | (0.00, 0.27)                                     | (0.00, -0.01) | (-0.00, 0.00)  |
| 5    | 2 | (0.00, -0.00)                                    | (0.00, -0.20) | (-0.00, 0.33)  |

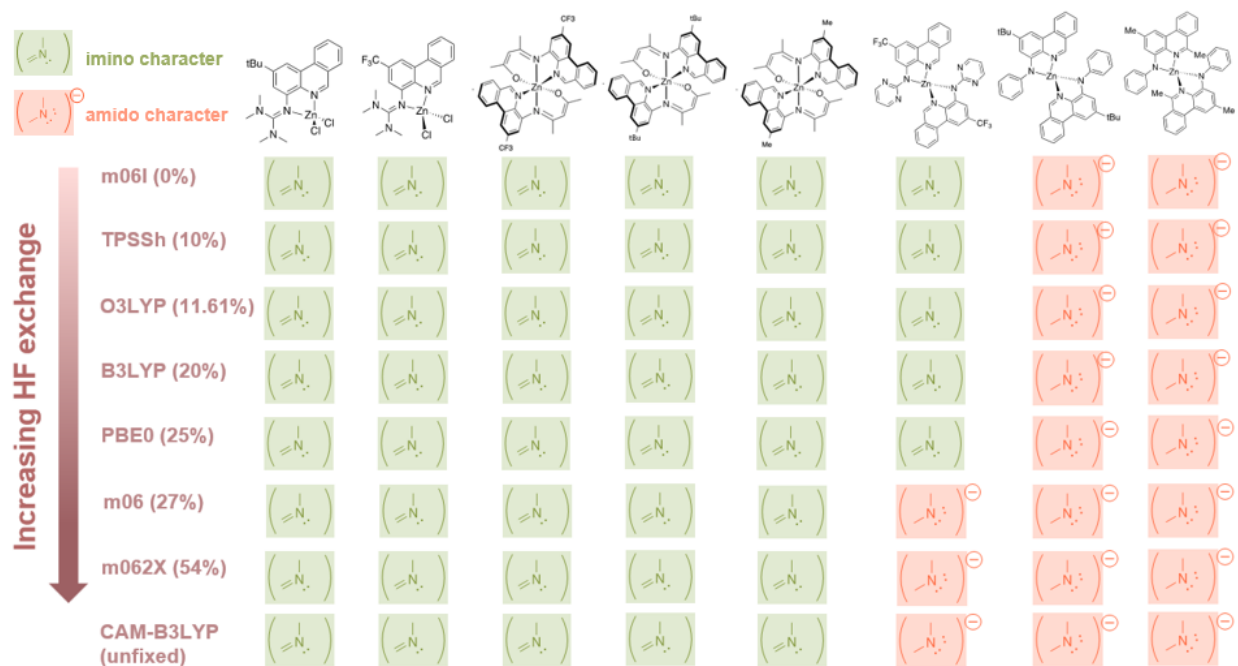

**Figure S25.** NBO results for complexes of varying  $N_{\text{amido}}$  character.

<sup>a</sup> For all functionals, gas phase/ def2-tzvp def2/j

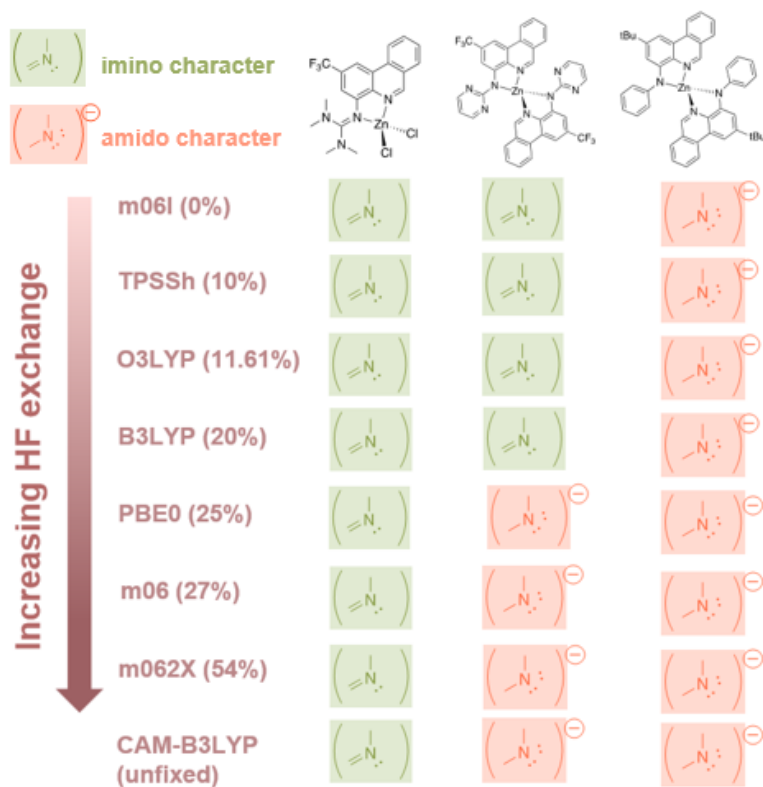

**Figure S26.** Solvated NBO results for select complexes of varying  $N_{\text{amido}}$  character.

<sup>a</sup> For all functionals, SMD "dichloromethane"/ def2-tzvp def2/j

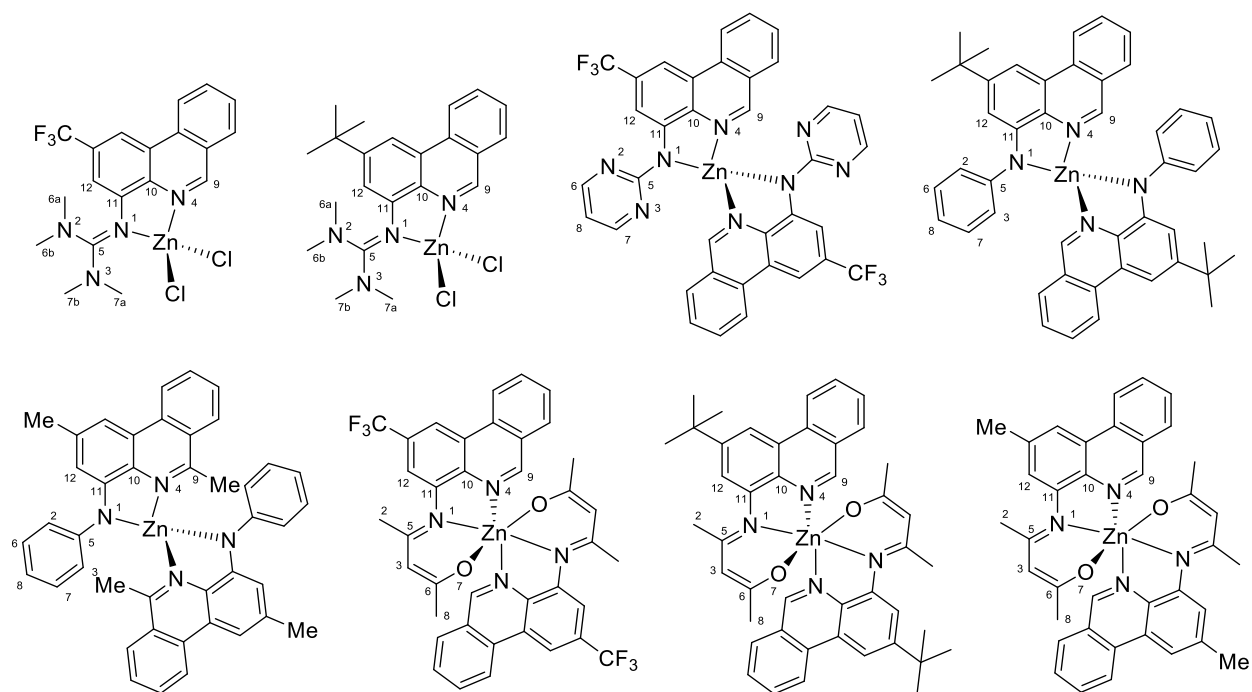

**Figure S27.** Atomic labels for NBO tables. Top, from left to right:  $(\text{CF}_3\text{L1})\text{ZnCl}_2$ ,  $(t\text{BuL1})\text{ZnCl}_2$ ,  $(\text{CF}_3\text{L2})_2\text{Zn}$ ,  $(t\text{BuL3})_2\text{Zn}$ . Bottom, from left to right:  $(\text{Me}^\text{Me}\text{L3})_2\text{Zn}$ ,  $(\text{CF}_3\text{L4})_2\text{Zn}$ ,  $(t\text{BuL4})_2\text{Zn}$ ,  $(\text{MeL4})_2\text{Zn}$ .

**Table S34.** NBO analysis<sup>a</sup> of (CF<sub>3</sub>L1)ZnCl<sub>2</sub> with the M06-L functional.

| NBO <sup>b</sup>  | Occupancy <sup>c</sup> | Hybridization <sup>d</sup>               | Atomic Orbital Contributions (%) <sup>e</sup>                                |
|-------------------|------------------------|------------------------------------------|------------------------------------------------------------------------------|
| Lone pair 1 (N1)  | 1.83456                | $sp^{2.30}$                              | $s(30.32\%)p(69.60\%)$                                                       |
| $\sigma(N1-C5)$   | 1.98066                | $sp^{1.84}$ at N1<br>$sp^{1.85}$ at C5   | N1 (59.03%): $s(35.06\%)p(64.62\%)$<br>C5 (40.97%): $s(35.11\%)p(64.80\%)$   |
| $\pi(N1-C5)$      | 1.85196                | n/a                                      | N1 (74.22%): $s(0.12\%)p(99.74\%)$<br>C5 (25.78%): $s(0.29\%)p(99.50\%)$     |
| $\sigma(N1-C11)$  | 1.98049                | $sp^{2.15}$ at N1<br>$sp^{1.90}$ at C11  | N1 (58.87%): $s(34.38\%)p(65.33\%)$<br>C11 (41.13%): $s(31.69\%)p(68.22\%)$  |
| Lone pair 1 (N2)  | 1.68044                | n/a                                      | $s(0.00\%)p(99.94\%)$                                                        |
| $\sigma(N2-C5)$   | 1.98077                | $sp^{2.08}$ at N2<br>$sp^{1.80}$ at C5   | N2 (61.40%): $s(35.64\%)p(64.20\%)$<br>C5 (38.60%): $s(32.39\%)p(67.51\%)$   |
| $\sigma(N2-C6a)$  | 1.98313                | $sp^{2.10}$ at N2<br>$sp^{2.89}$ at C6a  | N2 (62.19%): $s(32.22\%)p(67.67\%)$<br>C6a (37.81%): $s(25.71\%)p(74.22\%)$  |
| $\sigma(N2-C6b)$  | 1.98404                | $sp^{2.12}$ at N2<br>$sp^{2.78}$ at C6b  | N2 (61.62%): $s(32.01\%)p(67.88\%)$<br>C6b (38.38%): $s(26.47\%)p(73.46\%)$  |
| Lone pair 1 (N3)  | 1.65321                | n/a                                      | $s(2.78\%)p(97.15\%)$                                                        |
| $\sigma(N3-C5)$   | 1.97954                | $sp^{2.11}$ at N3<br>$sp^{1.81}$ at C5   | N3 (61.19%): $s(35.49\%)p(64.32\%)$<br>C5 (38.81%): $s(32.13\%)p(67.77\%)$   |
| $\sigma(N3-C7a)$  | 1.97996                | $sp^{2.28}$ at N3<br>$sp^{2.87}$ at C7a  | N3 (61.98%): $s(30.46\%)p(69.42\%)$<br>C7a (38.02%): $s(25.80\%)p(74.13\%)$  |
| $\sigma(N3-C7b)$  | 1.98497                | $sp^{2.21}$ at N3<br>$sp^{2.92}$ at C7b  | N3 (62.23%): $s(31.13\%)p(68.75\%)$<br>C7b (37.77%): $s(25.50\%)p(74.43\%)$  |
| $\sigma(C11-C12)$ | 1.97853                | $sp^{1.76}$ at C11<br>$sp^{1.77}$ at C12 | C11 (50.60%): $s(36.24\%)p(63.64\%)$<br>C12 (49.40%): $s(36.09\%)p(63.74\%)$ |
| $\pi(C11-C12)$    | 1.65401                | n/a                                      | C11 (46.89%): $s(0.02\%)p(99.88\%)$<br>C12 (53.11%): $s(0.01\%)p(99.90\%)$   |
| $\sigma(C11-C10)$ | 1.97226                | $sp^{1.94}$ at C10<br>$sp^{2.12}$ at C11 | C10 (50.67%): $s(34.01\%)p(65.86\%)$<br>C11 (49.33%): $s(31.99\%)p(67.88\%)$ |
| Lone pair 1 (N4)  | 1.87149                | $sp^{2.42}$                              | $s(29.19\%)p(70.78\%)$                                                       |
| $\sigma(N4-C9)$   | 1.98871                | $sp^{1.65}$ at N4<br>$sp^{1.91}$ at C9   | N4 (59.91%): $s(37.63\%)p(62.03\%)$<br>C9 (40.09%): $s(34.28\%)p(65.62\%)$   |
| $\pi(N4-C9)$      | 1.84705                | n/a                                      | N4 (63.43%): $s(0.00\%)p(99.82\%)$<br>C9 (36.57%): $s(0.00\%)p(99.85\%)$     |
| $\sigma(N4-C10)$  | 1.98163                | $sp^{2.02}$ at N4<br>$sp^{2.29}$ at C10  | N4 (58.91%): $s(33.04\%)p(66.65\%)$<br>C10 (41.09%): $s(30.38\%)p(69.54\%)$  |

<sup>a</sup> Calculated in gas phase at the optimized S0 geometry using M06-L (gas phase/ def2-tzvpp def2/j). The M06-L functional uses 0 % Hartree-Fock exchange.<sup>19</sup>

<sup>b</sup> The general formulation of a sigma natural bond orbital (NBO) is  $\sigma_{AB} = c_A h_A + c_B h_B$ , where  $h_A$  and  $h_B$  are the atom-centered hybrid orbitals of atoms A and B, and  $c_A$  and  $c_B$  are the normalized polarization coefficients of atoms A and B. If the natural ionicity of an NBO, given by  $i_{AB} = \frac{(c_A^2 - c_B^2)}{(c_A^2 + c_B^2)}$ , exceeds a fixed limit ( $|i_{AB}| > 0.95$ ), this extremely polarized “bond” is identified instead as a lone pair.<sup>20</sup>

<sup>c</sup> Orbital occupancy ( $0 \leq x \leq 2$ ) is the number of electrons in the specified NBO. Lower orbital occupancy values are indicative of stronger delocalization.<sup>20</sup>

<sup>d</sup> Hybridization of a given NBO is of the form  $sp^\lambda$ , where  $\lambda = (\frac{\%p}{\%s})$ .<sup>20</sup> Hybridizations with a very high value of  $\lambda$  (for example,  $sp^\infty$ ) have been denoted as non-applicable.

<sup>e</sup> Atomic orbital contributions denote the percent contribution of s, p, d, and f orbitals from atom A, and the percent contribution of s, p, d, and f orbitals from atom B, to their shared NBO  $\sigma_{AB}$  or  $\pi_{AB}$ .<sup>20</sup> Contributions from d and f orbitals are negligible and are omitted for simplicity. The percent contributions from each atom A ( $c_A^2 \times 100\%$ ) and B ( $c_B^2 \times 100\%$ ) to their shared NBO are also shown.

**Table S35.** NBO analysis<sup>a</sup> of (CF<sub>3</sub>L1)ZnCl<sub>2</sub> with the TPSSh functional.

| NBO <sup>b</sup>  | Occupancy <sup>c</sup> | Hybridization <sup>d</sup>               | Atomic Orbital Contributions (%) <sup>e</sup>                                |
|-------------------|------------------------|------------------------------------------|------------------------------------------------------------------------------|
| Lone pair 1 (N1)  | 1.83499                | $sp^{2.50}$                              | $s(28.58\%)p(71.34\%)$                                                       |
| $\sigma(N1-C5)$   | 1.98116                | $sp^{1.76}$ at N1<br>$sp^{1.85}$ at C5   | N1 (58.85%): $s(36.05\%)p(63.59\%)$<br>C5 (41.15%): $s(35.05\%)p(64.84\%)$   |
| $\pi(N1-C5)$      | 1.85365                | n/a                                      | N1 (74.39%): $s(0.11\%)p(99.75\%)$<br>C5 (25.61%): $s(0.24\%)p(99.56\%)$     |
| $\sigma(N1-C11)$  | 1.98091                | $sp^{2.14}$ at N1<br>$sp^{1.84}$ at C11  | N1 (58.59%): $s(35.14\%)p(64.55\%)$<br>C11 (41.41%): $s(31.82\%)p(68.08\%)$  |
| Lone pair 1 (N2)  | 1.68049                | n/a                                      | $s(0.00\%)p(99.95\%)$                                                        |
| $\sigma(N2-C5)$   | 1.98089                | $sp^{2.07}$ at N2<br>$sp^{1.80}$ at C5   | N2 (61.27%): $s(35.65\%)p(64.17\%)$<br>C5 (38.73%): $s(32.50\%)p(67.38\%)$   |
| $\sigma(N2-C6a)$  | 1.98342                | $sp^{2.10}$ at N2<br>$sp^{2.91}$ at C6a  | N2 (62.44%): $s(32.20\%)p(67.68\%)$<br>C6a (37.56%): $s(25.58\%)p(74.33\%)$  |
| $\sigma(N2-C6b)$  | 1.98439                | $sp^{2.12}$ at N2<br>$sp^{2.79}$ at C6b  | N2 (61.83%): $s(31.99\%)p(67.88\%)$<br>C6b (38.17%): $s(26.37\%)p(73.54\%)$  |
| Lone pair 1 (N3)  | 1.65192                | n/a                                      | $s(2.51\%)p(97.43\%)$                                                        |
| $\sigma(N3-C5)$   | 1.97956                | $sp^{2.11}$ at N3<br>$sp^{1.81}$ at C5   | N3 (61.06%): $s(35.57\%)p(64.22\%)$<br>C5 (38.94%): $s(32.11\%)p(67.77\%)$   |
| $\sigma(N3-C7a)$  | 1.98064                | $sp^{2.27}$ at N3<br>$sp^{2.89}$ at C7a  | N3 (62.21%): $s(30.54\%)p(69.33\%)$<br>C7a (37.79%): $s(25.67\%)p(74.24\%)$  |
| $\sigma(N3-C7b)$  | 1.98547                | $sp^{2.20}$ at N3<br>$sp^{2.94}$ at C7b  | N3 (62.49%): $s(31.22\%)p(68.66\%)$<br>C7b (37.51%): $s(25.37\%)p(74.54\%)$  |
| $\sigma(C11-C12)$ | 1.97790                | $sp^{1.76}$ at C11<br>$sp^{1.78}$ at C12 | C11 (50.75%): $s(36.25\%)p(63.64\%)$<br>C12 (49.25%): $s(35.97\%)p(63.86\%)$ |
| $\pi(C11-C12)$    | 1.65477                | n/a                                      | C11 (47.41%): $s(0.02\%)p(99.90\%)$<br>C12 (52.59%): $s(0.01\%)p(99.90\%)$   |
| $\sigma(C11-C10)$ | 1.97223                | $sp^{1.94}$ at C10<br>$sp^{2.14}$ at C11 | C10 (50.71%): $s(33.96\%)p(65.93\%)$<br>C11 (49.29%): $s(31.85\%)p(68.02\%)$ |
| Lone pair 1 (N4)  | 1.87196                | $sp^{2.45}$                              | $s(27.99\%)p(71.99\%)$                                                       |
| $\sigma(N4-C9)$   | 1.98877                | $sp^{1.61}$ at N4<br>$sp^{1.92}$ at C9   | N4 (59.84%): $s(38.22\%)p(61.41\%)$<br>C9 (40.16%): $s(34.25\%)p(65.63\%)$   |
| $\pi(N4-C9)$      | 1.84686                | n/a                                      | N4 (63.55%): $s(0.00\%)p(99.82\%)$<br>C9 (36.45%): $s(0.00\%)p(99.86\%)$     |
| $\sigma(N4-C10)$  | 1.98235                | $sp^{1.96}$ at N4<br>$sp^{2.28}$ at C10  | N4 (58.67%): $s(33.65\%)p(66.03\%)$<br>C10 (41.33%): $s(30.46\%)p(69.44\%)$  |

<sup>a</sup> Calculated in gas phase at the optimized S0 geometry using TPSSh (gas phase/ def2-tzvpp def2/j). The TPSSh functional uses 10 % Hartree-Fock exchange.<sup>11</sup>

<sup>b</sup> The general formulation of a sigma natural bond orbital (NBO) is  $\sigma_{AB} = c_A h_A + c_B h_B$ , where  $h_A$  and  $h_B$  are the atom-centered hybrid orbitals of atoms A and B, and  $c_A$  and  $c_B$  are the normalized polarization coefficients of atoms A and B. If the natural ionicity of an NBO, given by  $i_{AB} = \frac{(c_A^2 - c_B^2)}{(c_A^2 + c_B^2)}$ , exceeds a fixed limit ( $|i_{AB}| > 0.95$ ), this extremely polarized “bond” is identified instead as a lone pair.<sup>20</sup>

<sup>c</sup> Orbital occupancy ( $0 \leq x \leq 2$ ) is the number of electrons in the specified NBO. Lower orbital occupancy values are indicative of stronger delocalization.<sup>20</sup>

<sup>d</sup> Hybridization of a given NBO is of the form  $sp^\lambda$ , where  $\lambda = \left(\frac{\%p}{\%s}\right)$ .<sup>20</sup> Hybridizations with a very high value of  $\lambda$  (for example,  $sp^\infty$ ) have been denoted as non-applicable.

<sup>e</sup> Atomic orbital contributions denote the percent contribution of s, p, d, and f orbitals from atom A, and the percent contribution of s, p, d, and f orbitals from atom B, to their shared NBO  $\sigma_{AB}$  or  $\pi_{AB}$ .<sup>20</sup> Contributions from d and f orbitals are negligible and are omitted for simplicity. The percent contributions from each atom A ( $c_A^2 \times 100\%$ ) and B ( $c_B^2 \times 100\%$ ) to their shared NBO are also shown.

**Table S36.** NBO analysis<sup>a</sup> of (CF<sub>3</sub>L1)ZnCl<sub>2</sub> with the O3LYP functional.

| NBO <sup>b</sup>  | Occupancy <sup>c</sup> | Hybridization <sup>d</sup>               | Atomic Orbital Contributions (%) <sup>e</sup>                                |
|-------------------|------------------------|------------------------------------------|------------------------------------------------------------------------------|
| Lone pair 1 (N1)  | 1.83262                | $sp^{2.52}$                              | $s(28.40\%)p(71.51\%)$                                                       |
| $\sigma(N1-C5)$   | 1.98112                | $sp^{1.76}$ at N1<br>$sp^{1.85}$ at C5   | N1 (58.69%): $s(36.15\%)p(63.50\%)$<br>C5 (41.31%): $s(35.02\%)p(64.87\%)$   |
| $\pi(N1-C5)$      | 1.85224                | n/a                                      | N1 (74.20%): $s(0.10\%)p(99.77\%)$<br>C5 (25.80%): $s(0.23\%)p(99.58\%)$     |
| $\sigma(N1-C11)$  | 1.98082                | $sp^{2.13}$ at N1<br>$sp^{1.83}$ at C11  | N1 (58.43%): $s(35.23\%)p(64.47\%)$<br>C11 (41.57%): $s(31.87\%)p(68.04\%)$  |
| Lone pair 1 (N2)  | 1.67790                | n/a                                      | $s(0.00\%)p(99.95\%)$                                                        |
| $\sigma(N2-C5)$   | 1.98070                | $sp^{2.07}$ at N2<br>$sp^{1.81}$ at C5   | N2 (61.12%): $s(35.59\%)p(64.24\%)$<br>C5 (38.88%): $s(32.56\%)p(67.33\%)$   |
| $\sigma(N2-C6a)$  | 1.98358                | $sp^{2.10}$ at N2<br>$sp^{2.89}$ at C6a  | N2 (62.18%): $s(32.22\%)p(67.67\%)$<br>C6a (37.82%): $s(25.67\%)p(74.24\%)$  |
| $\sigma(N2-C6b)$  | 1.98457                | $sp^{2.12}$ at N2<br>$sp^{2.78}$ at C6b  | N2 (61.59%): $s(32.04\%)p(67.84\%)$<br>C6b (38.41%): $s(26.45\%)p(73.47\%)$  |
| Lone pair 1 (N3)  | 1.64944                | n/a                                      | $s(2.42\%)p(97.52\%)$                                                        |
| $\sigma(N3-C5)$   | 1.97947                | $sp^{2.11}$ at N3<br>$sp^{1.81}$ at C5   | N3 (60.92%): $s(35.53\%)p(64.27\%)$<br>C5 (39.08%): $s(32.10\%)p(67.79\%)$   |
| $\sigma(N3-C7a)$  | 1.98103                | $sp^{2.26}$ at N3<br>$sp^{2.88}$ at C7a  | N3 (61.95%): $s(30.63\%)p(69.25\%)$<br>C7a (38.05%): $s(25.75\%)p(74.16\%)$  |
| $\sigma(N3-C7b)$  | 1.98551                | $sp^{2.20}$ at N3<br>$sp^{2.92}$ at C7b  | N3 (62.23%): $s(31.25\%)p(68.62\%)$<br>C7b (37.77%): $s(25.46\%)p(74.45\%)$  |
| $\sigma(C11-C12)$ | 1.97748                | $sp^{1.76}$ at C11<br>$sp^{1.78}$ at C12 | C11 (50.75%): $s(36.24\%)p(63.65\%)$<br>C12 (49.25%): $s(35.92\%)p(63.92\%)$ |
| $\pi(C11-C12)$    | 1.65331                | n/a                                      | C11 (47.42%): $s(0.01\%)p(99.90\%)$<br>C12 (52.58%): $s(0.01\%)p(99.91\%)$   |
| $\sigma(C11-C10)$ | 1.97177                | $sp^{1.95}$ at C10<br>$sp^{2.14}$ at C11 | C10 (50.69%): $s(33.91\%)p(65.98\%)$<br>C11 (49.31%): $s(31.81\%)p(68.08\%)$ |
| Lone pair 1 (N4)  | 1.86998                | $sp^{2.45}$                              | $s(27.87\%)p(72.11\%)$                                                       |
| $\sigma(N4-C9)$   | 1.98860                | $sp^{1.60}$ at N4<br>$sp^{1.92}$ at C9   | N4 (59.72%): $s(38.32\%)p(61.31\%)$<br>C9 (40.28%): $s(34.24\%)p(65.63\%)$   |
| $\pi(N4-C9)$      | 1.84779                | n/a                                      | N4 (63.49%): $s(0.00\%)p(99.82\%)$<br>C9 (36.51%): $s(0.00\%)p(99.86\%)$     |
| $\sigma(N4-C10)$  | 1.98214                | $sp^{1.96}$ at N4<br>$sp^{2.27}$ at C10  | N4 (58.51%): $s(33.67\%)p(66.01\%)$<br>C10 (41.49%): $s(30.53\%)p(69.38\%)$  |

<sup>a</sup> Calculated in gas phase at the optimized S0 geometry using O3LYP (gas phase/ def2-tzvpp def2/j). The O3LYP functional uses 11.61 % Hartree-Fock exchange.<sup>21</sup>

<sup>b</sup> The general formulation of a sigma natural bond orbital (NBO) is  $\sigma_{AB} = c_A h_A + c_B h_B$ , where  $h_A$  and  $h_B$  are the atom-centered hybrid orbitals of atoms A and B, and  $c_A$  and  $c_B$  are the normalized polarization coefficients of atoms A and B. If the natural ionicity of an NBO, given by  $i_{AB} = \frac{(c_A^2 - c_B^2)}{(c_A^2 + c_B^2)}$ , exceeds a fixed limit ( $|i_{AB}| > 0.95$ ), this extremely polarized “bond” is identified instead as a lone pair.<sup>20</sup>

<sup>c</sup> Orbital occupancy ( $0 \leq x \leq 2$ ) is the number of electrons in the specified NBO. Lower orbital occupancy values are indicative of stronger delocalization.<sup>20</sup>

<sup>d</sup> Hybridization of a given NBO is of the form  $sp^\lambda$ , where  $\lambda = \left(\frac{\%p}{\%s}\right)$ .<sup>20</sup> Hybridizations with a very high value of  $\lambda$  (for example,  $sp^\infty$ ) have been denoted as non-applicable.

<sup>e</sup> Atomic orbital contributions denote the percent contribution of s, p, d, and f orbitals from atom A, and the percent contribution of s, p, d, and f orbitals from atom B, to their shared NBO  $\sigma_{AB}$  or  $\pi_{AB}$ .<sup>20</sup> Contributions from d and f orbitals are negligible and are omitted for simplicity. The percent contributions from each atom A ( $c_A^2 \times 100\%$ ) and B ( $c_B^2 \times 100\%$ ) to their shared NBO are also shown.

**Table S37.** NBO analysis<sup>a</sup> of (CF<sub>3</sub>L1)ZnCl<sub>2</sub> with the B3LYP functional.

| NBO <sup>b</sup>  | Occupancy <sup>c</sup> | Hybridization <sup>d</sup>               | Atomic Orbital Contributions (%) <sup>e</sup>                                |
|-------------------|------------------------|------------------------------------------|------------------------------------------------------------------------------|
| Lone pair 1 (N1)  | 1.83797                | $sp^{2.56}$                              | $s(28.05\%)p(71.86\%)$                                                       |
| $\sigma(N1-C5)$   | 1.98138                | $sp^{1.75}$ at N1<br>$sp^{1.85}$ at C5   | N1 (58.81%): $s(36.29\%)p(63.34\%)$<br>C5 (41.19%): $s(35.00\%)p(64.88\%)$   |
| $\pi(N1-C5)$      | 1.85799                | n/a                                      | N1 (74.92%): $s(0.10\%)p(99.76\%)$<br>C5 (25.08%): $s(0.22\%)p(99.59\%)$     |
| $\sigma(N1-C11)$  | 1.98121                | $sp^{2.14}$ at N1<br>$sp^{1.81}$ at C11  | N1 (58.56%): $s(35.43\%)p(64.25\%)$<br>C11 (41.44%): $s(31.84\%)p(68.05\%)$  |
| Lone pair 1 (N2)  | 1.68743                | n/a                                      | $s(0.00\%)p(99.95\%)$                                                        |
| $\sigma(N2-C5)$   | 1.98103                | $sp^{2.07}$ at N2<br>$sp^{1.81}$ at C5   | N2 (61.24%): $s(35.55\%)p(64.26\%)$<br>C5 (38.76%): $s(32.57\%)p(67.31\%)$   |
| $\sigma(N2-C6a)$  | 1.98389                | $sp^{2.10}$ at N2<br>$sp^{2.88}$ at C6a  | N2 (62.32%): $s(32.23\%)p(67.65\%)$<br>C6a (37.68%): $s(25.73\%)p(74.17\%)$  |
| $\sigma(N2-C6b)$  | 1.98482                | $sp^{2.12}$ at N2<br>$sp^{2.77}$ at C6b  | N2 (61.75%): $s(32.06\%)p(67.81\%)$<br>C6b (38.25%): $s(26.50\%)p(73.41\%)$  |
| Lone pair 1 (N3)  | 1.65887                | n/a                                      | $s(2.34\%)p(97.60\%)$                                                        |
| $\sigma(N3-C5)$   | 1.97978                | $sp^{2.11}$ at N3<br>$sp^{1.81}$ at C5   | N3 (61.03%): $s(35.51\%)p(64.27\%)$<br>C5 (38.97%): $s(32.12\%)p(67.76\%)$   |
| $\sigma(N3-C7a)$  | 1.98152                | $sp^{2.26}$ at N3<br>$sp^{2.87}$ at C7a  | N3 (62.11%): $s(30.68\%)p(69.19\%)$<br>C7a (37.89%): $s(25.81\%)p(74.09\%)$  |
| $\sigma(N3-C7b)$  | 1.98584                | $sp^{2.19}$ at N3<br>$sp^{2.91}$ at C7b  | N3 (62.40%): $s(31.30\%)p(68.57\%)$<br>C7b (37.60%): $s(25.53\%)p(74.37\%)$  |
| $\sigma(C11-C12)$ | 1.97783                | $sp^{1.76}$ at C11<br>$sp^{1.77}$ at C12 | C11 (50.73%): $s(36.24\%)p(63.64\%)$<br>C12 (49.27%): $s(35.98\%)p(63.84\%)$ |
| $\pi(C11-C12)$    | 1.65602                | n/a                                      | C11 (47.08%): $s(0.01\%)p(99.90\%)$<br>C12 (52.92%): $s(0.01\%)p(99.91\%)$   |
| $\sigma(C11-C10)$ | 1.97229                | $sp^{1.95}$ at C10<br>$sp^{2.14}$ at C11 | C10 (50.72%): $s(33.91\%)p(65.97\%)$<br>C11 (49.28%): $s(31.82\%)p(68.05\%)$ |
| Lone pair 1 (N4)  | 1.87462                | $sp^{2.45}$                              | $s(27.39\%)p(72.59\%)$                                                       |
| $\sigma(N4-C9)$   | 1.98855                | $sp^{1.58}$ at N4<br>$sp^{1.91}$ at C9   | N4 (59.81%): $s(38.54\%)p(61.07\%)$<br>C9 (40.19%): $s(34.29\%)p(65.58\%)$   |
| $\pi(N4-C9)$      | 1.85028                | n/a                                      | N4 (63.66%): $s(0.00\%)p(99.82\%)$<br>C9 (36.34%): $s(0.00\%)p(99.86\%)$     |
| $\sigma(N4-C10)$  | 1.98237                | $sp^{1.94}$ at N4<br>$sp^{2.27}$ at C10  | N4 (58.68%): $s(33.93\%)p(65.73\%)$<br>C10 (41.32%): $s(30.52\%)p(69.38\%)$  |

<sup>a</sup> Calculated in gas phase at the optimized S0 geometry using B3LYP (gas phase/ def2-tzvp def2/j). The B3LYP functional uses 20 % Hartree-Fock exchange.<sup>22</sup>

<sup>b</sup> The general formulation of a sigma natural bond orbital (NBO) is  $\sigma_{AB} = c_A h_A + c_B h_B$ , where  $h_A$  and  $h_B$  are the atom-centered hybrid orbitals of atoms A and B, and  $c_A$  and  $c_B$  are the normalized polarization coefficients of atoms A and B. If the natural ionicity of an NBO, given by  $i_{AB} = \frac{(c_A^2 - c_B^2)}{(c_A^2 + c_B^2)}$ , exceeds a fixed limit ( $|i_{AB}| > 0.95$ ), this extremely polarized “bond” is identified instead as a lone pair.<sup>20</sup>

<sup>c</sup> Orbital occupancy ( $0 \leq x \leq 2$ ) is the number of electrons in the specified NBO. Lower orbital occupancy values are indicative of stronger delocalization.<sup>20</sup>

<sup>d</sup> Hybridization of a given NBO is of the form  $sp^\lambda$ , where  $\lambda = \left(\frac{\%p}{\%s}\right)$ .<sup>20</sup> Hybridizations with a very high value of  $\lambda$  (for example,  $sp^\infty$ ) have been denoted as non-applicable.

<sup>e</sup> Atomic orbital contributions denote the percent contribution of s, p, d, and f orbitals from atom A, and the percent contribution of s, p, d, and f orbitals from atom B, to their shared NBO  $\sigma_{AB}$  or  $\pi_{AB}$ .<sup>20</sup> Contributions from d and f orbitals are negligible and are omitted for simplicity. The percent contributions from each atom A ( $c_A^2 \times 100\%$ ) and B ( $c_B^2 \times 100\%$ ) to their shared NBO are also shown.

**Table S38.** NBO analysis<sup>a</sup> of (CF<sub>3</sub>L1)ZnCl<sub>2</sub> with the PBE0 functional.

| NBO <sup>b</sup>  | Occupancy <sup>c</sup> | Hybridization <sup>d</sup>               | Atomic Orbital Contributions (%) <sup>e</sup>                                |
|-------------------|------------------------|------------------------------------------|------------------------------------------------------------------------------|
| Lone pair 1 (N1)  | 1.83982                | $sp^{2.57}$                              | $s(27.99\%)p(71.92\%)$                                                       |
| $\sigma(N1-C5)$   | 1.98150                | $sp^{1.74}$ at N1<br>$sp^{1.85}$ at C5   | N1 (58.83%): $s(36.35\%)p(63.27\%)$<br>C5 (41.17%): $s(34.99\%)p(64.89\%)$   |
| $\pi(N1-C5)$      | 1.85878                | n/a                                      | N1 (75.22%): $s(0.11\%)p(99.75\%)$<br>C5 (24.78%): $s(0.23\%)p(99.56\%)$     |
| $\sigma(N1-C11)$  | 1.98127                | $sp^{2.13}$ at N1<br>$sp^{1.81}$ at C11  | N1 (58.49%): $s(35.42\%)p(64.25\%)$<br>C11 (41.51%): $s(31.87\%)p(68.03\%)$  |
| Lone pair 1 (N2)  | 1.68825                | n/a                                      | $s(0.00\%)p(99.95\%)$                                                        |
| $\sigma(N2-C5)$   | 1.98111                | $sp^{2.07}$ at N2<br>$sp^{1.80}$ at C5   | N2 (61.25%): $s(35.59\%)p(64.22\%)$<br>C5 (38.75%): $s(32.56\%)p(67.32\%)$   |
| $\sigma(N2-C6a)$  | 1.98393                | $sp^{2.10}$ at N2<br>$sp^{2.89}$ at C6a  | N2 (62.30%): $s(32.22\%)p(67.65\%)$<br>C6a (37.70%): $s(25.68\%)p(74.23\%)$  |
| $\sigma(N2-C6b)$  | 1.98488                | $sp^{2.12}$ at N2<br>$sp^{2.78}$ at C6b  | N2 (61.70%): $s(32.02\%)p(67.85\%)$<br>C6b (38.30%): $s(26.46\%)p(73.45\%)$  |
| Lone pair 1 (N3)  | 1.66022                | n/a                                      | $s(2.38\%)p(97.56\%)$                                                        |
| $\sigma(N3-C5)$   | 1.97984                | $sp^{2.11}$ at N3<br>$sp^{1.81}$ at C5   | N3 (61.04%): $s(35.54\%)p(64.24\%)$<br>C5 (38.96%): $s(32.12\%)p(67.76\%)$   |
| $\sigma(N3-C7a)$  | 1.98150                | $sp^{2.26}$ at N3<br>$sp^{2.88}$ at C7a  | N3 (62.07%): $s(30.66\%)p(69.21\%)$<br>C7a (37.93%): $s(25.76\%)p(74.15\%)$  |
| $\sigma(N3-C7b)$  | 1.98589                | $sp^{2.20}$ at N3<br>$sp^{2.92}$ at C7b  | N3 (62.34%): $s(31.25\%)p(68.61\%)$<br>C7b (37.66%): $s(25.48\%)p(74.42\%)$  |
| $\sigma(C11-C12)$ | 1.97794                | $sp^{1.76}$ at C11<br>$sp^{1.78}$ at C12 | C11 (50.71%): $s(36.24\%)p(63.64\%)$<br>C12 (49.29%): $s(35.96\%)p(63.86\%)$ |
| $\pi(C11-C12)$    | 1.65719                | n/a                                      | C11 (47.10%): $s(0.01\%)p(99.90\%)$<br>C12 (52.90%): $s(0.01\%)p(99.90\%)$   |
| $\sigma(C11-C10)$ | 1.97250                | $sp^{1.94}$ at C10<br>$sp^{2.14}$ at C11 | C10 (50.74%): $s(33.94\%)p(65.94\%)$<br>C11 (49.26%): $s(31.80\%)p(68.07\%)$ |
| Lone pair 1 (N4)  | 1.87641                | $sp^{2.63}$                              | $s(27.52\%)p(72.46\%)$                                                       |
| $\sigma(N4-C9)$   | 1.98876                | $sp^{1.59}$ at N4<br>$sp^{1.91}$ at C9   | N4 (59.76%): $s(38.45\%)p(61.16\%)$<br>C9 (40.24%): $s(34.28\%)p(65.59\%)$   |
| $\pi(N4-C9)$      | 1.85124                | n/a                                      | N4 (63.77%): $s(0.00\%)p(99.81\%)$<br>C9 (36.23%): $s(0.00\%)p(99.85\%)$     |
| $\sigma(N4-C10)$  | 1.98253                | $sp^{1.94}$ at N4<br>$sp^{2.27}$ at C10  | N4 (58.58%): $s(33.89\%)p(65.77\%)$<br>C10 (41.42%): $s(30.51\%)p(69.40\%)$  |

<sup>a</sup> Calculated in gas phase at the optimized S0 geometry using PBE0 (gas phase/ def2-tzvpp def2/j). The PBE0 functional uses 25 % Hartree-Fock exchange.<sup>14</sup>

<sup>b</sup> The general formulation of a sigma natural bond orbital (NBO) is  $\sigma_{AB} = c_A h_A + c_B h_B$ , where  $h_A$  and  $h_B$  are the atom-centered hybrid orbitals of atoms A and B, and  $c_A$  and  $c_B$  are the normalized polarization coefficients of atoms A and B. If the natural ionicity of an NBO, given by  $i_{AB} = \frac{(c_A^2 - c_B^2)}{(c_A^2 + c_B^2)}$ , exceeds a fixed limit ( $|i_{AB}| > 0.95$ ), this extremely polarized “bond” is identified instead as a lone pair.<sup>20</sup>

<sup>c</sup> Orbital occupancy ( $0 \leq x \leq 2$ ) is the number of electrons in the specified NBO. Lower orbital occupancy values are indicative of stronger delocalization.<sup>20</sup>

<sup>d</sup> Hybridization of a given NBO is of the form  $sp^\lambda$ , where  $\lambda = \left(\frac{\%p}{\%s}\right)$ .<sup>20</sup> Hybridizations with a very high value of  $\lambda$  (for example,  $sp^\infty$ ) have been denoted as non-applicable.

<sup>e</sup> Atomic orbital contributions denote the percent contribution of s, p, d, and f orbitals from atom A, and the percent contribution of s, p, d, and f orbitals from atom B, to their shared NBO  $\sigma_{AB}$  or  $\pi_{AB}$ .<sup>20</sup> Contributions from d and f orbitals are negligible and are omitted for simplicity. The percent contributions from each atom A ( $c_A^2 \times 100\%$ ) and B ( $c_B^2 \times 100\%$ ) to their shared NBO are also shown.

**Table S39.** NBO analysis<sup>a</sup> of (CF<sub>3</sub>L1)ZnCl<sub>2</sub> with the M06 functional.

| NBO <sup>b</sup>  | Occupancy <sup>c</sup> | Hybridization <sup>d</sup>               | Atomic Orbital Contributions (%) <sup>e</sup>                                |
|-------------------|------------------------|------------------------------------------|------------------------------------------------------------------------------|
| Lone pair 1 (N1)  | 1.83617                | $sp^{2.54}$                              | $s(28.23\%)p(71.66\%)$                                                       |
| $\sigma(N1-C5)$   | 1.98120                | $sp^{1.76}$ at N1<br>$sp^{1.85}$ at C5   | N1 (59.04%): $s(36.13\%)p(63.56\%)$<br>C5 (40.96%): $s(35.01\%)p(64.90\%)$   |
| $\pi(N1-C5)$      | 1.86288                | n/a                                      | N1 (75.62%): $s(0.14\%)p(99.70\%)$<br>C5 (24.38%): $s(0.24\%)p(99.53\%)$     |
| $\sigma(N1-C11)$  | 1.98091                | $sp^{2.14}$ at N1<br>$sp^{1.82}$ at C11  | N1 (58.82%): $s(35.39\%)p(64.34\%)$<br>C11 (41.18%): $s(31.78\%)p(68.14\%)$  |
| Lone pair 1 (N2)  | 1.69707                | n/a                                      | $s(0.00\%)p(99.94\%)$                                                        |
| $\sigma(N2-C5)$   | 1.98082                | $sp^{2.07}$ at N2<br>$sp^{1.81}$ at C5   | N2 (61.42%): $s(35.58\%)p(64.28\%)$<br>C5 (38.58%): $s(32.55\%)p(67.36\%)$   |
| $\sigma(N2-C6a)$  | 1.98350                | $sp^{2.10}$ at N2<br>$sp^{2.89}$ at C6a  | N2 (62.46%): $s(32.24\%)p(67.66\%)$<br>C6a (37.54%): $s(25.70\%)p(74.23\%)$  |
| $\sigma(N2-C6b)$  | 1.98439                | $sp^{2.12}$ at N2<br>$sp^{2.78}$ at C6b  | N2 (61.88%): $s(32.04\%)p(67.86\%)$<br>C6b (38.12%): $s(26.46\%)p(73.47\%)$  |
| Lone pair 1 (N3)  | 1.66908                | n/a                                      | $s(2.32\%)p(97.60\%)$                                                        |
| $\sigma(N3-C5)$   | 1.97943                | $sp^{2.11}$ at N3<br>$sp^{1.81}$ at C5   | N3 (61.21%): $s(35.54\%)p(64.29\%)$<br>C5 (38.79%): $s(32.12\%)p(67.79\%)$   |
| $\sigma(N3-C7a)$  | 1.98112                | $sp^{2.26}$ at N3<br>$sp^{2.88}$ at C7a  | N3 (62.26%): $s(30.69\%)p(69.21\%)$<br>C7a (37.74%): $s(25.78\%)p(74.15\%)$  |
| $\sigma(N3-C7b)$  | 1.98550                | $sp^{2.19}$ at N3<br>$sp^{2.92}$ at C7b  | N3 (62.53%): $s(31.30\%)p(68.60\%)$<br>C7b (37.47%): $s(25.51\%)p(74.42\%)$  |
| $\sigma(C11-C12)$ | 1.97768                | $sp^{1.76}$ at C11<br>$sp^{1.77}$ at C12 | C11 (50.63%): $s(36.26\%)p(63.64\%)$<br>C12 (49.37%): $s(36.03\%)p(63.76\%)$ |
| $\pi(C11-C12)$    | 1.65789                | n/a                                      | C11 (46.62%): $s(0.02\%)p(99.89\%)$<br>C12 (53.38%): $s(0.01\%)p(99.90\%)$   |
| $\sigma(C11-C10)$ | 1.97190                | $sp^{1.94}$ at C10<br>$sp^{2.13}$ at C11 | C10 (50.71%): $s(33.96\%)p(65.93\%)$<br>C11 (49.29%): $s(31.88\%)p(68.00\%)$ |
| Lone pair 1 (N4)  | 1.87264                | $sp^{2.63}$                              | $s(27.53\%)p(72.43\%)$                                                       |
| $\sigma(N4-C9)$   | 1.98857                | $sp^{1.60}$ at N4<br>$sp^{1.91}$ at C9   | N4 (59.87%): $s(38.38\%)p(61.29\%)$<br>C9 (40.13%): $s(34.38\%)p(65.52\%)$   |
| $\pi(N4-C9)$      | 1.85486                | n/a                                      | N4 (64.35%): $s(0.00\%)p(99.79\%)$<br>C9 (35.65%): $s(0.00\%)p(99.84\%)$     |
| $\sigma(N4-C10)$  | 1.98198                | $sp^{1.94}$ at N4<br>$sp^{2.28}$ at C10  | N4 (58.90%): $s(33.96\%)p(65.75\%)$<br>C10 (41.10%): $s(30.45\%)p(69.47\%)$  |

<sup>a</sup> Calculated in gas phase at the optimized S0 geometry using M06 (gas phase/ def2-tzvpp def2/j). The M06 functional uses 27 % Hartree-Fock exchange.<sup>23</sup>

<sup>b</sup> The general formulation of a sigma natural bond orbital (NBO) is  $\sigma_{AB} = c_A h_A + c_B h_B$ , where  $h_A$  and  $h_B$  are the atom-centered hybrid orbitals of atoms A and B, and  $c_A$  and  $c_B$  are the normalized polarization coefficients of atoms A and B. If the natural ionicity of an NBO, given by  $i_{AB} = \frac{(c_A^2 - c_B^2)}{(c_A^2 + c_B^2)}$ , exceeds a fixed limit ( $|i_{AB}| > 0.95$ ), this extremely polarized “bond” is identified instead as a lone pair.<sup>20</sup>

<sup>c</sup> Orbital occupancy ( $0 \leq x \leq 2$ ) is the number of electrons in the specified NBO. Lower orbital occupancy values are indicative of stronger delocalization.<sup>20</sup>

<sup>d</sup> Hybridization of a given NBO is of the form  $sp^\lambda$ , where  $\lambda = (\frac{\%p}{\%s})$ .<sup>20</sup> Hybridizations with a very high value of  $\lambda$  (for example,  $sp^\infty$ ) have been denoted as non-applicable.

<sup>e</sup> Atomic orbital contributions denote the percent contribution of s, p, d, and f orbitals from atom A, and the percent contribution of s, p, d, and f orbitals from atom B, to their shared NBO  $\sigma_{AB}$  or  $\pi_{AB}$ .<sup>20</sup> Contributions from d and f orbitals are negligible and are omitted for simplicity. The percent contributions from each atom A ( $c_A^2 \times 100\%$ ) and B ( $c_B^2 \times 100\%$ ) to their shared NBO are also shown.

**Table S40.** NBO analysis<sup>a</sup> of (CF<sub>3</sub>L1)ZnCl<sub>2</sub> with the M06-2X functional.

| NBO <sup>b</sup>  | Occupancy <sup>c</sup> | Hybridization <sup>d</sup>               | Atomic Orbital Contributions (%) <sup>e</sup>                                |
|-------------------|------------------------|------------------------------------------|------------------------------------------------------------------------------|
| Lone pair 1 (N1)  | 1.85336                | $sp^{2.65}$                              | $s(27.36\%)p(72.54\%)$                                                       |
| $\sigma(N1-C5)$   | 1.98161                | $sp^{1.72}$ at N1<br>$sp^{1.86}$ at C5   | N1 (58.94%): $s(36.67\%)p(62.97\%)$<br>C5 (41.06%): $s(34.96\%)p(64.95\%)$   |
| $\pi(N1-C5)$      | 1.86651                | n/a                                      | N1 (76.02%): $s(0.11\%)p(99.73\%)$<br>C5 (23.98%): $s(0.24\%)p(99.54\%)$     |
| $\sigma(N1-C11)$  | 1.98125                | $sp^{2.14}$ at N1<br>$sp^{1.79}$ at C11  | N1 (58.59%): $s(35.72\%)p(63.96\%)$<br>C11 (41.41%): $s(31.84\%)p(68.08\%)$  |
| Lone pair 1 (N2)  | 1.69821                | n/a                                      | $s(0.00\%)p(99.94\%)$                                                        |
| $\sigma(N2-C5)$   | 1.98108                | $sp^{2.06}$ at N2<br>$sp^{1.81}$ at C5   | N2 (61.44%): $s(35.51\%)p(64.31\%)$<br>C5 (38.56%): $s(32.61\%)p(67.29\%)$   |
| $\sigma(N2-C6a)$  | 1.98373                | $sp^{2.10}$ at N2<br>$sp^{2.90}$ at C6a  | N2 (62.64%): $s(32.26\%)p(67.62\%)$<br>C6a (37.36%): $s(25.65\%)p(74.27\%)$  |
| $\sigma(N2-C6b)$  | 1.98461                | $sp^{2.12}$ at N2<br>$sp^{2.78}$ at C6b  | N2 (62.02%): $s(32.06\%)p(67.82\%)$<br>C6b (37.98%): $s(26.42\%)p(73.51\%)$  |
| Lone pair 1 (N3)  | 1.67034                | n/a                                      | $s(2.27\%)p(97.65\%)$                                                        |
| $\sigma(N3-C5)$   | 1.97986                | $sp^{2.11}$ at N3<br>$sp^{1.81}$ at C5   | N3 (61.23%): $s(35.50\%)p(64.30\%)$<br>C5 (38.77%): $s(32.12\%)p(67.78\%)$   |
| $\sigma(N3-C7a)$  | 1.98146                | $sp^{2.25}$ at N3<br>$sp^{2.89}$ at C7a  | N3 (62.42%): $s(30.75\%)p(69.12\%)$<br>C7a (37.58%): $s(25.71\%)p(74.21\%)$  |
| $\sigma(N3-C7b)$  | 1.98583                | $sp^{2.19}$ at N3<br>$sp^{2.93}$ at C7b  | N3 (62.66%): $s(31.30\%)p(68.57\%)$<br>C7b (37.34%): $s(25.45\%)p(74.47\%)$  |
| $\sigma(C11-C12)$ | 1.97829                | $sp^{1.75}$ at C11<br>$sp^{1.77}$ at C12 | C11 (50.72%): $s(36.30\%)p(63.59\%)$<br>C12 (49.28%): $s(36.00\%)p(63.82\%)$ |
| $\pi(C11-C12)$    | 1.66363                | n/a                                      | C11 (46.88%): $s(0.02\%)p(99.90\%)$<br>C12 (53.12%): $s(0.01\%)p(99.90\%)$   |
| $\sigma(C11-C10)$ | 1.97303                | $sp^{1.94}$ at C10<br>$sp^{2.14}$ at C11 | C10 (50.78%): $s(33.94\%)p(65.95\%)$<br>C11 (49.22%): $s(31.78\%)p(68.10\%)$ |
| Lone pair 1 (N4)  | 1.88916                | $sp^{2.71}$                              | $s(26.95\%)p(73.02\%)$                                                       |
| $\sigma(N4-C9)$   | 1.98869                | $sp^{1.57}$ at N4<br>$sp^{1.92}$ at C9   | N4 (59.92%): $s(38.71\%)p(60.91\%)$<br>C9 (40.08%): $s(34.23\%)p(65.65\%)$   |
| $\pi(N4-C9)$      | 1.85752                | n/a                                      | N4 (63.69%): $s(0.00\%)p(99.79\%)$<br>C9 (36.31%): $s(0.00\%)p(99.85\%)$     |
| $\sigma(N4-C10)$  | 1.98248                | $sp^{1.91}$ at N4<br>$sp^{2.28}$ at C10  | N4 (58.78%): $s(34.20\%)p(65.47\%)$<br>C10 (41.22%): $s(30.47\%)p(69.44\%)$  |

<sup>a</sup> Calculated in gas phase at the optimized S0 geometry using M06-2X (gas phase/ def2-tzvpp def2/j). The M06-2X functional uses 54 % Hartree-Fock exchange.<sup>23</sup>

<sup>b</sup> The general formulation of a sigma natural bond orbital (NBO) is  $\sigma_{AB} = c_A h_A + c_B h_B$ , where  $h_A$  and  $h_B$  are the atom-centered hybrid orbitals of atoms A and B, and  $c_A$  and  $c_B$  are the normalized polarization coefficients of atoms A and B. If the natural ionicity of an NBO, given by  $i_{AB} = \frac{(c_A^2 - c_B^2)}{(c_A^2 + c_B^2)}$ , exceeds a fixed limit ( $|i_{AB}| > 0.95$ ), this extremely polarized “bond” is identified instead as a lone pair.<sup>20</sup>

<sup>c</sup> Orbital occupancy ( $0 \leq x \leq 2$ ) is the number of electrons in the specified NBO. Lower orbital occupancy values are indicative of stronger delocalization.<sup>20</sup>

<sup>d</sup> Hybridization of a given NBO is of the form  $sp^\lambda$ , where  $\lambda = \left(\frac{\%p}{\%s}\right)$ .<sup>20</sup> Hybridizations with a very high value of  $\lambda$  (for example,  $sp^\infty$ ) have been denoted as non-applicable.

<sup>e</sup> Atomic orbital contributions denote the percent contribution of s, p, d, and f orbitals from atom A, and the percent contribution of s, p, d, and f orbitals from atom B, to their shared NBO  $\sigma_{AB}$  or  $\pi_{AB}$ .<sup>20</sup> Contributions from d and f orbitals are negligible and are omitted for simplicity. The percent contributions from each atom A ( $c_A^2 \times 100\%$ ) and B ( $c_B^2 \times 100\%$ ) to their shared NBO are also shown.

**Table S41.** NBO analysis<sup>a</sup> of (CF<sub>3</sub>L1)ZnCl<sub>2</sub> with the CAM-B3LYP functional.

| NBO <sup>b</sup>  | Occupancy <sup>c</sup> | Hybridization <sup>d</sup>               | Atomic Orbital Contributions (%) <sup>e</sup>                                |
|-------------------|------------------------|------------------------------------------|------------------------------------------------------------------------------|
| Lone pair 1 (N1)  | 1.84523                | $sp^{2.68}$                              | $s(27.16\%)p(72.75\%)$                                                       |
| $\sigma(N1-C5)$   | 1.98181                | $sp^{1.71}$ at N1<br>$sp^{1.86}$ at C5   | N1 (58.87%): $s(36.73\%)p(62.89\%)$<br>C5 (41.13%): $s(34.94\%)p(64.94\%)$   |
| $\pi(N1-C5)$      | 1.86885                | n/a                                      | N1 (76.13%): $s(0.13\%)p(99.73\%)$<br>C5 (23.87%): $s(0.21\%)p(99.57\%)$     |
| $\sigma(N1-C11)$  | 1.98156                | $sp^{2.14}$ at N1<br>$sp^{1.78}$ at C11  | N1 (58.54%): $s(35.85\%)p(63.81\%)$<br>C11 (41.46%): $s(31.82\%)p(68.07\%)$  |
| Lone pair 1 (N2)  | 1.69995                | n/a                                      | $s(0.00\%)p(99.95\%)$                                                        |
| $\sigma(N2-C5)$   | 1.98149                | $sp^{2.06}$ at N2<br>$sp^{1.81}$ at C5   | N2 (61.30%): $s(35.52\%)p(64.28\%)$<br>C5 (38.70%): $s(32.61\%)p(67.27\%)$   |
| $\sigma(N2-C6a)$  | 1.98436                | $sp^{2.10}$ at N2<br>$sp^{2.89}$ at C6a  | N2 (62.38%): $s(32.24\%)p(67.63\%)$<br>C6a (37.62%): $s(25.71\%)p(74.19\%)$  |
| $\sigma(N2-C6b)$  | 1.98526                | $sp^{2.11}$ at N2<br>$sp^{2.78}$ at C6b  | N2 (61.80%): $s(32.07\%)p(67.79\%)$<br>C6b (38.20%): $s(26.46\%)p(73.44\%)$  |
| Lone pair 1 (N3)  | 1.67140                | n/a                                      | $s(2.18\%)p(97.75\%)$                                                        |
| $\sigma(N3-C5)$   | 1.98015                | $sp^{2.11}$ at N3<br>$sp^{1.81}$ at C5   | N3 (61.08%): $s(35.51\%)p(64.27\%)$<br>C5 (38.92%): $s(32.13\%)p(67.74\%)$   |
| $\sigma(N3-C7a)$  | 1.98233                | $sp^{2.24}$ at N3<br>$sp^{2.88}$ at C7a  | N3 (62.18%): $s(30.79\%)p(69.07\%)$<br>C7a (37.82%): $s(25.78\%)p(74.12\%)$  |
| $\sigma(N3-C7b)$  | 1.98632                | $sp^{2.19}$ at N3<br>$sp^{2.92}$ at C7b  | N3 (62.45%): $s(31.35\%)p(68.51\%)$<br>C7b (37.55%): $s(25.51\%)p(74.39\%)$  |
| $\sigma(C11-C12)$ | 1.97797                | $sp^{1.75}$ at C11<br>$sp^{1.77}$ at C12 | C11 (50.69%): $s(36.28\%)p(63.60\%)$<br>C12 (49.31%): $s(36.01\%)p(63.80\%)$ |
| $\pi(C11-C12)$    | 1.66410                | n/a                                      | C11 (46.69%): $s(0.01\%)p(99.89\%)$<br>C12 (53.31%): $s(0.01\%)p(99.90\%)$   |
| $\sigma(C11-C10)$ | 1.97308                | $sp^{1.94}$ at C10<br>$sp^{2.14}$ at C11 | C10 (50.78%): $s(33.95\%)p(65.92\%)$<br>C11 (49.22%): $s(31.80\%)p(68.06\%)$ |
| Lone pair 1 (N4)  | 1.88134                | $sp^{2.45}$                              | $s(26.72\%)p(73.26\%)$                                                       |
| $\sigma(N4-C9)$   | 1.98852                | $sp^{1.57}$ at N4<br>$sp^{1.91}$ at C9   | N4 (59.79%): $s(38.81\%)p(60.79\%)$<br>C9 (40.21%): $s(34.28\%)p(65.59\%)$   |
| $\pi(N4-C9)$      | 1.85902                | n/a                                      | N4 (63.96%): $s(0.00\%)p(99.81\%)$<br>C9 (36.04%): $s(0.00\%)p(99.85\%)$     |
| $\sigma(N4-C10)$  | 1.98272                | $sp^{1.90}$ at N4<br>$sp^{2.28}$ at C10  | N4 (58.71%): $s(34.33\%)p(65.32\%)$<br>C10 (41.29%): $s(30.45\%)p(69.45\%)$  |

<sup>a</sup> Calculated in gas phase at the optimized S0 geometry using CAM-B3LYP (gas phase/ def2-tzvpp def2/j). The CAM-B3LYP functional is a range-separated functional, and uses 19 % Hartree-Fock exchange at short range, 33 % Hartree-Fock exchange at intermediate range, and 65 % Hartree-Fock exchange at long range.<sup>15</sup>

<sup>b</sup> The general formulation of a sigma natural bond orbital (NBO) is  $\sigma_{AB} = c_A h_A + c_B h_B$ , where  $h_A$  and  $h_B$  are the atom-centered hybrid orbitals of atoms A and B, and  $c_A$  and  $c_B$  are the normalized polarization coefficients of atoms A and B. If the natural ionicity of an NBO, given by  $i_{AB} = \frac{(c_A^2 - c_B^2)}{(c_A^2 + c_B^2)}$ , exceeds a fixed limit ( $|i_{AB}| > 0.95$ ), this extremely polarized “bond” is identified instead as a lone pair.<sup>20</sup>

<sup>c</sup> Orbital occupancy ( $0 \leq x \leq 2$ ) is the number of electrons in the specified NBO. Lower orbital occupancy values are indicative of stronger delocalization.<sup>20</sup>

<sup>d</sup> Hybridization of a given NBO is of the form  $sp^\lambda$ , where  $\lambda = (\frac{\%p}{\%s})$ .<sup>20</sup> Hybridizations with a very high value of  $\lambda$  (for example,  $sp^\infty$ ) have been denoted as non-applicable.

<sup>e</sup> Atomic orbital contributions denote the percent contribution of s, p, d, and f orbitals from atom A, and the percent contribution of s, p, d, and f orbitals from atom B, to their shared NBO  $\sigma_{AB}$  or  $\pi_{AB}$ .<sup>20</sup> Contributions from d and f orbitals are negligible and are omitted for simplicity. The percent contributions from each atom A ( $c_A^2 \times 100\%$ ) and B ( $c_B^2 \times 100\%$ ) to their shared NBO are also shown.





**Table S44.** Solvated NBO analysis<sup>a</sup> of (CF<sub>3</sub>L1)ZnCl<sub>2</sub> with the O3LYP functional.

| NBO <sup>b</sup>  | Occupancy <sup>c</sup> | Hybridization <sup>d</sup>               | Atomic Orbital Contributions (%) <sup>e</sup>                                |
|-------------------|------------------------|------------------------------------------|------------------------------------------------------------------------------|
| Lone pair 1 (N1)  | 1.83061                | $sp^{2.56}$                              | $s(28.03\%)p(71.88\%)$                                                       |
| $\sigma(N1-C5)$   | 1.98131                | $sp^{1.74}$ at N1<br>$sp^{1.86}$ at C5   | N1 (58.84%): $s(36.32\%)p(63.34\%)$<br>C5 (41.16%): $s(34.94\%)p(64.95\%)$   |
| $\pi(N1-C5)$      | 1.85393                | n/a                                      | N1 (75.00%): $s(0.10\%)p(99.78\%)$<br>C5 (25.00%): $s(0.20\%)p(99.60\%)$     |
| $\sigma(N1-C11)$  | 1.98103                | $sp^{1.81}$ at N1<br>$sp^{2.13}$ at C11  | N1 (58.52%): $s(35.43\%)p(64.27\%)$<br>C11 (41.48%): $s(31.87\%)p(68.03\%)$  |
| Lone pair 1 (N2)  | 1.67734                | n/a                                      | $s(0.00\%)p(99.95\%)$                                                        |
| $\sigma(N2-C5)$   | 1.98051                | $sp^{1.82}$ at N2<br>$sp^{2.05}$ at C5   | N2 (60.91%): $s(35.36\%)p(64.46\%)$<br>C5 (39.09%): $s(32.72\%)p(67.17\%)$   |
| $\sigma(N2-C6a)$  | 1.98357                | $sp^{2.11}$ at N2<br>$sp^{2.89}$ at C6a  | N2 (62.13%): $s(32.15\%)p(67.74\%)$<br>C6a (37.87%): $s(25.70\%)p(74.21\%)$  |
| $\sigma(N2-C6b)$  | 1.98393                | $sp^{2.09}$ at N2<br>$sp^{2.81}$ at C6b  | N2 (62.01%): $s(32.33\%)p(67.55\%)$<br>C6b (37.99%): $s(26.23\%)p(73.68\%)$  |
| Lone pair 1 (N3)  | 1.64766                | n/a                                      | $s(2.47\%)p(97.47\%)$                                                        |
| $\sigma(N3-C5)$   | 1.97959                | $sp^{1.81}$ at N3<br>$sp^{2.12}$ at C5   | N3 (60.85%): $s(35.46\%)p(64.34\%)$<br>C5 (39.15%): $s(32.05\%)p(67.84\%)$   |
| $\sigma(N3-C7a)$  | 1.98086                | $sp^{2.25}$ at N3<br>$sp^{2.90}$ at C7a  | N3 (62.12%): $s(30.76\%)p(69.12\%)$<br>C7a (37.88%): $s(25.65\%)p(74.27\%)$  |
| $\sigma(N3-C7b)$  | 1.98573                | $sp^{2.21}$ at N3<br>$sp^{2.90}$ at C7b  | N3 (62.06%): $s(31.14\%)p(68.73\%)$<br>C7b (37.94%): $s(25.60\%)p(74.31\%)$  |
| $\sigma(C11-C12)$ | 1.97708                | $sp^{1.75}$ at C11<br>$sp^{1.79}$ at C12 | C11 (50.83%): $s(36.30\%)p(63.60\%)$<br>C12 (49.17%): $s(35.84\%)p(64.00\%)$ |
| $\pi(C11-C12)$    | 1.65192                | n/a                                      | C11 (47.90%): $s(0.01\%)p(99.91\%)$<br>C12 (52.10%): $s(0.01\%)p(99.91\%)$   |
| $\sigma(C11-C10)$ | 1.97206                | $sp^{1.95}$ at C10<br>$sp^{2.15}$ at C11 | C10 (50.73%): $s(33.88\%)p(66.02\%)$<br>C11 (49.27%): $s(31.76\%)p(68.13\%)$ |
| Lone pair 1 (N4)  | 1.86661                | $sp^{2.62}$                              | $s(27.60\%)p(72.38\%)$                                                       |
| $\sigma(N4-C9)$   | 1.98863                | $sp^{1.59}$ at N4<br>$sp^{1.93}$ at C9   | N4 (59.88%): $s(38.40\%)p(61.24\%)$<br>C9 (40.12%): $s(34.07\%)p(65.81\%)$   |
| $\pi(N4-C9)$      | 1.85261                | n/a                                      | N4 (64.41%): $s(0.00\%)p(99.83\%)$<br>C9 (35.59%): $s(0.00\%)p(99.86\%)$     |
| $\sigma(N4-C10)$  | 1.98242                | $sp^{1.94}$ at N4<br>$sp^{2.28}$ at C10  | N4 (58.64%): $s(33.86\%)p(65.83\%)$<br>C10 (41.36%): $s(30.48\%)p(69.43\%)$  |

<sup>a</sup> Calculated in solution at the optimized S0 geometry using O3LYP (gas phase/ def2-tzvpp def2/j). The O3LYP functional uses 11.61 % Hartree-Fock exchange.<sup>21</sup>

<sup>b</sup> The general formulation of a sigma natural bond orbital (NBO) is  $\sigma_{AB} = c_A h_A + c_B h_B$ , where  $h_A$  and  $h_B$  are the atom-centered hybrid orbitals of atoms A and B, and  $c_A$  and  $c_B$  are the normalized polarization coefficients of atoms A and B. If the natural ionicity of an NBO, given by  $i_{AB} = \frac{(c_A^2 - c_B^2)}{(c_A^2 + c_B^2)}$ , exceeds a fixed limit ( $|i_{AB}| > 0.95$ ), this extremely polarized “bond” is identified instead as a lone pair.<sup>20</sup>

<sup>c</sup> Orbital occupancy ( $0 \leq x \leq 2$ ) is the number of electrons in the specified NBO. Lower orbital occupancy values are indicative of stronger delocalization.<sup>20</sup>

<sup>d</sup> Hybridization of a given NBO is of the form  $sp^\lambda$ , where  $\lambda = (\frac{\%p}{\%s})$ .<sup>20</sup> Hybridizations with a very high value of  $\lambda$  (for example,  $sp^\infty$ ) have been denoted as non-applicable.

<sup>e</sup> Atomic orbital contributions denote the percent contribution of s, p, d, and f orbitals from atom A, and the percent contribution of s, p, d, and f orbitals from atom B, to their shared NBO  $\sigma_{AB}$  or  $\pi_{AB}$ .<sup>20</sup> Contributions from d and f orbitals are negligible and are omitted for simplicity. The percent contributions from each atom A ( $c_A^2 \times 100\%$ ) and B ( $c_B^2 \times 100\%$ ) to their shared NBO are also shown.

**Table S45.** Solvated NBO analysis<sup>a</sup> of (CF<sub>3</sub>L1)ZnCl<sub>2</sub> with the B3LYP functional.

| NBO <sup>b</sup>  | Occupancy <sup>c</sup> | Hybridization <sup>d</sup>               | Atomic Orbital Contributions (%) <sup>e</sup>                                |
|-------------------|------------------------|------------------------------------------|------------------------------------------------------------------------------|
| Lone pair 1 (N1)  | 1.83578                | $sp^{2.61}$                              | $s(27.69\%)p(72.22\%)$                                                       |
| $\sigma(N1-C5)$   | 1.98155                | $sp^{1.73}$ at N1<br>$sp^{1.86}$ at C5   | N1 (58.95%): $s(36.43\%)p(63.20\%)$<br>C5 (41.05%): $s(34.92\%)p(64.96\%)$   |
| $\pi(N1-C5)$      | 1.86028                | n/a                                      | N1 (75.69%): $s(0.11\%)p(99.77\%)$<br>C5 (24.31%): $s(0.19\%)p(99.62\%)$     |
| $\sigma(N1-C11)$  | 1.98140                | $sp^{1.80}$ at N1<br>$sp^{2.14}$ at C11  | N1 (58.67%): $s(35.65\%)p(64.04\%)$<br>C11 (41.33%): $s(31.84\%)p(68.05\%)$  |
| Lone pair 1 (N2)  | 1.67725                | n/a                                      | $s(0.00\%)p(99.95\%)$                                                        |
| $\sigma(N2-C5)$   | 1.98085                | $sp^{1.83}$ at N2<br>$sp^{2.05}$ at C5   | N2 (61.03%): $s(35.33\%)p(64.48\%)$<br>C5 (38.97%): $s(32.73\%)p(67.15\%)$   |
| $\sigma(N2-C6a)$  | 1.98387                | $sp^{2.11}$ at N2<br>$sp^{2.88}$ at C6a  | N2 (62.28%): $s(32.16\%)p(67.71\%)$<br>C6a (37.72%): $s(25.77\%)p(74.13\%)$  |
| $\sigma(N2-C6b)$  | 1.98422                | $sp^{2.09}$ at N2<br>$sp^{2.80}$ at C6b  | N2 (62.16%): $s(32.34\%)p(67.53\%)$<br>C6b (37.84%): $s(26.29\%)p(73.61\%)$  |
| Lone pair 1 (N3)  | 1.65761                | n/a                                      | $s(2.39\%)p(97.55\%)$                                                        |
| $\sigma(N3-C5)$   | 1.97992                | $sp^{1.81}$ at N3<br>$sp^{2.11}$ at C5   | N3 (60.97%): $s(35.45\%)p(64.34\%)$<br>C5 (39.03%): $s(32.07\%)p(67.81\%)$   |
| $\sigma(N3-C7a)$  | 1.98139                | $sp^{2.24}$ at N3<br>$sp^{2.89}$ at C7a  | N3 (62.28%): $s(30.81\%)p(69.06\%)$<br>C7a (37.72%): $s(25.71\%)p(74.19\%)$  |
| $\sigma(N3-C7b)$  | 1.98605                | $sp^{2.20}$ at N3<br>$sp^{2.89}$ at C7b  | N3 (62.21%): $s(31.19\%)p(68.68\%)$<br>C7b (37.79%): $s(25.68\%)p(74.23\%)$  |
| $\sigma(C11-C12)$ | 1.97744                | $sp^{1.75}$ at C11<br>$sp^{1.78}$ at C12 | C11 (50.80%): $s(36.29\%)p(63.59\%)$<br>C12 (49.20%): $s(35.91\%)p(63.91\%)$ |
| $\pi(C11-C12)$    | 1.65505                | n/a                                      | C11 (47.59%): $s(0.01\%)p(99.91\%)$<br>C12 (52.41%): $s(0.01\%)p(99.90\%)$   |
| $\sigma(C11-C10)$ | 1.97255                | $sp^{1.95}$ at C10<br>$sp^{2.14}$ at C11 | C10 (50.74%): $s(33.87\%)p(66.00\%)$<br>C11 (49.26%): $s(31.78\%)p(68.09\%)$ |
| Lone pair 1 (N4)  | 1.87092                | $sp^{2.69}$                              | $s(27.13\%)p(72.85\%)$                                                       |
| $\sigma(N4-C9)$   | 1.98857                | $sp^{1.58}$ at N4<br>$sp^{1.93}$ at C9   | N4 (59.98%): $s(38.62\%)p(61.00\%)$<br>C9 (40.02%): $s(34.12\%)p(65.75\%)$   |
| $\pi(N4-C9)$      | 1.85506                | n/a                                      | N4 (64.65%): $s(0.00\%)p(99.83\%)$<br>C9 (35.35%): $s(0.00\%)p(99.86\%)$     |
| $\sigma(N4-C10)$  | 1.98262                | $sp^{1.92}$ at N4<br>$sp^{2.28}$ at C10  | N4 (58.81%): $s(34.11\%)p(65.55\%)$<br>C10 (41.19%): $s(30.47\%)p(69.42\%)$  |

<sup>a</sup> Calculated in solution at the optimized S0 geometry using B3LYP (gas phase/ def2-tzvpp def2/j). The B3LYP functional uses 20 % Hartree-Fock exchange.<sup>22</sup>

<sup>b</sup> The general formulation of a sigma natural bond orbital (NBO) is  $\sigma_{AB} = c_A h_A + c_B h_B$ , where  $h_A$  and  $h_B$  are the atom-centered hybrid orbitals of atoms A and B, and  $c_A$  and  $c_B$  are the normalized polarization coefficients of atoms A and B. If the natural ionicity of an NBO, given by  $i_{AB} = \frac{(c_A^2 - c_B^2)}{(c_A^2 + c_B^2)}$ , exceeds a fixed limit ( $|i_{AB}| > 0.95$ ), this extremely polarized “bond” is identified instead as a lone pair.<sup>20</sup>

<sup>c</sup> Orbital occupancy ( $0 \leq x \leq 2$ ) is the number of electrons in the specified NBO. Lower orbital occupancy values are indicative of stronger delocalization.<sup>20</sup>

<sup>d</sup> Hybridization of a given NBO is of the form  $sp^\lambda$ , where  $\lambda = \left(\frac{\%p}{\%s}\right)$ .<sup>20</sup> Hybridizations with a very high value of  $\lambda$  (for example,  $sp^\infty$ ) have been denoted as non-applicable.

<sup>e</sup> Atomic orbital contributions denote the percent contribution of s, p, d, and f orbitals from atom A, and the percent contribution of s, p, d, and f orbitals from atom B, to their shared NBO  $\sigma_{AB}$  or  $\pi_{AB}$ .<sup>20</sup> Contributions from d and f orbitals are negligible and are omitted for simplicity. The percent contributions from each atom A ( $c_A^2 \times 100\%$ ) and B ( $c_B^2 \times 100\%$ ) to their shared NBO are also shown.

**Table S46.** Solvated NBO analysis<sup>a</sup> of (C<sup>F3</sup>L1)ZnCl<sub>2</sub> with the PBE0 functional.

| NBO <sup>b</sup>  | Occupancy <sup>c</sup> | Hybridization <sup>d</sup>               | Atomic Orbital Contributions (%) <sup>e</sup>                                |
|-------------------|------------------------|------------------------------------------|------------------------------------------------------------------------------|
| Lone pair 1 (N1)  | 1.83794                | $sp^{2.61}$                              | $s(27.62\%)p(72.29\%)$                                                       |
| $\sigma(N1-C5)$   | 1.98168                | $sp^{1.73}$ at N1<br>$sp^{1.86}$ at C5   | N1 (58.98%): $s(36.51\%)p(63.12\%)$<br>C5 (41.02%): $s(34.91\%)p(64.98\%)$   |
| $\pi(N1-C5)$      | 1.86079                | n/a                                      | N1 (76.00%): $s(0.12\%)p(99.75\%)$<br>C5 (24.00%): $s(0.20\%)p(99.59\%)$     |
| $\sigma(N1-C11)$  | 1.98147                | $sp^{1.80}$ at N1<br>$sp^{2.13}$ at C11  | N1 (58.59%): $s(35.63\%)p(64.04\%)$<br>C11 (41.41%): $s(31.87\%)p(68.03\%)$  |
| Lone pair 1 (N2)  | 1.67812                | n/a                                      | $s(0.00\%)p(99.95\%)$                                                        |
| $\sigma(N2-C5)$   | 1.98093                | $sp^{1.82}$ at N2<br>$sp^{2.05}$ at C5   | N2 (61.04%): $s(35.36\%)p(64.44\%)$<br>C5 (38.96%): $s(32.73\%)p(67.16\%)$   |
| $\sigma(N2-C6a)$  | 1.98392                | $sp^{2.11}$ at N2<br>$sp^{2.89}$ at C6a  | N2 (62.24%): $s(32.15\%)p(67.72\%)$<br>C6a (37.76%): $s(25.71\%)p(74.19\%)$  |
| $\sigma(N2-C6b)$  | 1.98425                | $sp^{2.09}$ at N2<br>$sp^{2.81}$ at C6b  | N2 (62.12%): $s(32.31\%)p(67.56\%)$<br>C6b (37.88%): $s(26.24\%)p(73.67\%)$  |
| Lone pair 1 (N3)  | 1.65870                | n/a                                      | $s(2.43\%)p(97.50\%)$                                                        |
| $\sigma(N3-C5)$   | 1.97997                | $sp^{1.81}$ at N3<br>$sp^{2.11}$ at C5   | N3 (60.97%): $s(35.47\%)p(64.31\%)$<br>C5 (39.03%): $s(32.07\%)p(67.81\%)$   |
| $\sigma(N3-C7a)$  | 1.98135                | $sp^{2.24}$ at N3<br>$sp^{2.89}$ at C7a  | N3 (62.24%): $s(30.79\%)p(69.08\%)$<br>C7a (37.76%): $s(25.65\%)p(74.25\%)$  |
| $\sigma(N3-C7b)$  | 1.98610                | $sp^{2.21}$ at N3<br>$sp^{2.90}$ at C7b  | N3 (62.16%): $s(31.14\%)p(68.73\%)$<br>C7b (37.84%): $s(25.62\%)p(74.29\%)$  |
| $\sigma(C11-C12)$ | 1.97757                | $sp^{1.75}$ at C11<br>$sp^{1.78}$ at C12 | C11 (50.79%): $s(36.29\%)p(63.59\%)$<br>C12 (49.21%): $s(35.88\%)p(63.93\%)$ |
| $\pi(C11-C12)$    | 1.65628                | n/a                                      | C11 (47.62%): $s(0.01\%)p(99.90\%)$<br>C12 (52.38%): $s(0.01\%)p(99.90\%)$   |
| $\sigma(C11-C10)$ | 1.97277                | $sp^{1.95}$ at C10<br>$sp^{2.14}$ at C11 | C10 (50.76%): $s(33.90\%)p(65.98\%)$<br>C11 (49.24%): $s(31.76\%)p(68.11\%)$ |
| Lone pair 1 (N4)  | 1.87318                | $sp^{2.67}$                              | $s(27.26\%)p(72.72\%)$                                                       |
| $\sigma(N4-C9)$   | 1.98879                | $sp^{1.59}$ at N4<br>$sp^{1.93}$ at C9   | N4 (59.93%): $s(38.53\%)p(61.08\%)$<br>C9 (40.07%): $s(34.10\%)p(65.77\%)$   |
| $\pi(N4-C9)$      | 1.85577                | n/a                                      | N4 (64.79%): $s(0.00\%)p(99.82\%)$<br>C9 (35.21%): $s(0.00\%)p(99.85\%)$     |
| $\sigma(N4-C10)$  | 1.98280                | $sp^{1.93}$ at N4<br>$sp^{2.28}$ at C10  | N4 (58.71%): $s(34.07\%)p(65.59\%)$<br>C10 (41.29%): $s(30.46\%)p(69.44\%)$  |

<sup>a</sup> Calculated in solution at the optimized S0 geometry using PBE0 (gas phase/ def2-tzvpp def2/j). The PBE0 functional uses 25 % Hartree-Fock exchange.<sup>14</sup>

<sup>b</sup> The general formulation of a sigma natural bond orbital (NBO) is  $\sigma_{AB} = c_A h_A + c_B h_B$ , where  $h_A$  and  $h_B$  are the atom-centered hybrid orbitals of atoms A and B, and  $c_A$  and  $c_B$  are the normalized polarization coefficients of atoms A and B. If the natural ionicity of an NBO, given by  $i_{AB} = \frac{(c_A^2 - c_B^2)}{(c_A^2 + c_B^2)}$ , exceeds a fixed limit ( $|i_{AB}| > 0.95$ ), this extremely polarized “bond” is identified instead as a lone pair.<sup>20</sup>

<sup>c</sup> Orbital occupancy ( $0 \leq x \leq 2$ ) is the number of electrons in the specified NBO. Lower orbital occupancy values are indicative of stronger delocalization.<sup>20</sup>

<sup>d</sup> Hybridization of a given NBO is of the form  $sp^\lambda$ , where  $\lambda = \left(\frac{\%p}{\%s}\right)$ .<sup>20</sup> Hybridizations with a very high value of  $\lambda$  (for example,  $sp^\infty$ ) have been denoted as non-applicable.

<sup>e</sup> Atomic orbital contributions denote the percent contribution of s, p, d, and f orbitals from atom A, and the percent contribution of s, p, d, and f orbitals from atom B, to their shared NBO  $\sigma_{AB}$  or  $\pi_{AB}$ .<sup>20</sup> Contributions from d and f orbitals are negligible and are omitted for simplicity. The percent contributions from each atom A ( $c_A^2 \times 100\%$ ) and B ( $c_B^2 \times 100\%$ ) to their shared NBO are also shown.

**Table S47.** Solvated NBO analysis<sup>a</sup> of (CF<sub>3</sub>L1)ZnCl<sub>2</sub> with the M06 functional.

| NBO <sup>b</sup>  | Occupancy <sup>c</sup> | Hybridization <sup>d</sup>               | Atomic Orbital Contributions (%) <sup>e</sup>                                |
|-------------------|------------------------|------------------------------------------|------------------------------------------------------------------------------|
| Lone pair 1 (N1)  | 1.83409                | $sp^{2.59}$                              | $s(27.86\%)p(72.04\%)$                                                       |
| $\sigma(N1-C5)$   | 1.98139                | $sp^{1.75}$ at N1<br>$sp^{1.86}$ at C5   | N1 (59.18%): $s(36.27\%)p(63.42\%)$<br>C5 (40.82%): $s(34.94\%)p(64.97\%)$   |
| $\pi(N1-C5)$      | 1.86533                | n/a                                      | N1 (76.39%): $s(0.15\%)p(99.71\%)$<br>C5 (23.61%): $s(0.21\%)p(99.57\%)$     |
| $\sigma(N1-C11)$  | 1.98114                | $sp^{1.80}$ at N1<br>$sp^{2.15}$ at C11  | N1 (58.93%): $s(35.62\%)p(64.11\%)$<br>C11 (41.07%): $s(31.77\%)p(68.15\%)$  |
| Lone pair 1 (N2)  | 1.68745                | n/a                                      | $s(0.00\%)p(99.94\%)$                                                        |
| $\sigma(N2-C5)$   | 1.98065                | $sp^{1.82}$ at N2<br>$sp^{2.05}$ at C5   | N2 (61.22%): $s(35.35\%)p(64.50\%)$<br>C5 (38.78%): $s(32.72\%)p(67.19\%)$   |
| $\sigma(N2-C6a)$  | 1.98348                | $sp^{2.10}$ at N2<br>$sp^{2.88}$ at C6a  | N2 (62.42%): $s(32.18\%)p(67.72\%)$<br>C6a (37.58%): $s(25.73\%)p(74.19\%)$  |
| $\sigma(N2-C6b)$  | 1.98374                | $sp^{2.09}$ at N2<br>$sp^{2.81}$ at C6b  | N2 (62.31%): $s(32.33\%)p(67.57\%)$<br>C6b (37.69%): $s(26.25\%)p(73.68\%)$  |
| Lone pair 1 (N3)  | 1.66770                | n/a                                      | $s(2.37\%)p(97.56\%)$                                                        |
| $\sigma(N3-C5)$   | 1.97959                | $sp^{1.81}$ at N3<br>$sp^{2.12}$ at C5   | N3 (61.15%): $s(35.47\%)p(64.36\%)$<br>C5 (38.85%): $s(32.07\%)p(67.84\%)$   |
| $\sigma(N3-C7a)$  | 1.98099                | $sp^{2.24}$ at N3<br>$sp^{2.89}$ at C7a  | N3 (62.43%): $s(30.82\%)p(69.08\%)$<br>C7a (37.57%): $s(25.67\%)p(74.26\%)$  |
| $\sigma(N3-C7b)$  | 1.98572                | $sp^{2.20}$ at N3<br>$sp^{2.90}$ at C7b  | N3 (62.35%): $s(31.19\%)p(68.70\%)$<br>C7b (37.65%): $s(25.64\%)p(74.29\%)$  |
| $\sigma(C11-C12)$ | 1.97729                | $sp^{1.75}$ at C11<br>$sp^{1.77}$ at C12 | C11 (50.69%): $s(36.31\%)p(63.58\%)$<br>C12 (49.31%): $s(36.02\%)p(63.83\%)$ |
| $\pi(C11-C12)$    | 1.65771                | n/a                                      | C11 (47.16%): $s(0.01\%)p(99.90\%)$<br>C12 (52.84%): $s(0.01\%)p(99.90\%)$   |
| $\sigma(C11-C10)$ | 1.97213                | $sp^{1.94}$ at C10<br>$sp^{2.14}$ at C11 | C10 (50.72%): $s(33.92\%)p(65.97\%)$<br>C11 (49.28%): $s(31.84\%)p(68.04\%)$ |
| Lone pair 1 (N4)  | 1.86877                | $sp^{2.67}$                              | $s(27.27\%)p(72.70\%)$                                                       |
| $\sigma(N4-C9)$   | 1.98860                | $sp^{1.59}$ at N4<br>$sp^{1.92}$ at C9   | N4 (60.04%): $s(38.46\%)p(61.22\%)$<br>C9 (39.96%): $s(34.21\%)p(65.70\%)$   |
| $\pi(N4-C9)$      | 1.85971                | n/a                                      | N4 (65.45%): $s(0.00\%)p(99.81\%)$<br>C9 (34.55%): $s(0.00\%)p(99.84\%)$     |
| $\sigma(N4-C10)$  | 1.98255                | $sp^{1.92}$ at N4<br>$sp^{2.29}$ at C10  | N4 (59.04%): $s(34.15\%)p(65.56\%)$<br>C10 (40.96%): $s(30.40\%)p(69.51\%)$  |

<sup>a</sup> Calculated in solution at the optimized S0 geometry using M06 (gas phase/ def2-tzvpp def2/j). The M06 functional uses 27 % Hartree-Fock exchange.<sup>23</sup>

<sup>b</sup> The general formulation of a sigma natural bond orbital (NBO) is  $\sigma_{AB} = c_A h_A + c_B h_B$ , where  $h_A$  and  $h_B$  are the atom-centered hybrid orbitals of atoms A and B, and  $c_A$  and  $c_B$  are the normalized polarization coefficients of atoms A and B. If the natural ionicity of an NBO, given by  $i_{AB} = \frac{(c_A^2 - c_B^2)}{(c_A^2 + c_B^2)}$ , exceeds a fixed limit ( $|i_{AB}| > 0.95$ ), this extremely polarized “bond” is identified instead as a lone pair.<sup>20</sup>

<sup>c</sup> Orbital occupancy ( $0 \leq x \leq 2$ ) is the number of electrons in the specified NBO. Lower orbital occupancy values are indicative of stronger delocalization.<sup>20</sup>

<sup>d</sup> Hybridization of a given NBO is of the form  $sp^\lambda$ , where  $\lambda = (\frac{\%p}{\%s})$ .<sup>20</sup> Hybridizations with a very high value of  $\lambda$  (for example,  $sp^\infty$ ) have been denoted as non-applicable.

<sup>e</sup> Atomic orbital contributions denote the percent contribution of s, p, d, and f orbitals from atom A, and the percent contribution of s, p, d, and f orbitals from atom B, to their shared NBO  $\sigma_{AB}$  or  $\pi_{AB}$ .<sup>20</sup> Contributions from d and f orbitals are negligible and are omitted for simplicity. The percent contributions from each atom A ( $c_A^2 \times 100\%$ ) and B ( $c_B^2 \times 100\%$ ) to their shared NBO are also shown.

**Table S48.** Solvated NBO analysis<sup>a</sup> of (CF<sub>3</sub>L1)ZnCl<sub>2</sub> with the M06-2X functional.

| NBO <sup>b</sup>  | Occupancy <sup>c</sup> | Hybridization <sup>d</sup>               | Atomic Orbital Contributions (%) <sup>e</sup>                                |
|-------------------|------------------------|------------------------------------------|------------------------------------------------------------------------------|
| Lone pair 1 (N1)  | 1.85205                | $sp^{2.70}$                              | $s(27.00\%)p(72.91\%)$                                                       |
| $\sigma(N1-C5)$   | 1.98178                | $sp^{1.71}$ at N1<br>$sp^{1.87}$ at C5   | N1 (59.09%): $s(36.83\%)p(62.81\%)$<br>C5 (40.91%): $s(34.87\%)p(65.04\%)$   |
| $\pi(N1-C5)$      | 1.86873                | n/a                                      | N1 (76.78%): $s(0.12\%)p(99.74\%)$<br>C5 (23.22%): $s(0.21\%)p(99.56\%)$     |
| $\sigma(N1-C11)$  | 1.98142                | $sp^{1.77}$ at N1<br>$sp^{2.14}$ at C11  | N1 (58.69%): $s(35.93\%)p(63.76\%)$<br>C11 (41.31%): $s(31.84\%)p(68.08\%)$  |
| Lone pair 1 (N2)  | 1.68836                | n/a                                      | $s(0.00\%)p(99.94\%)$                                                        |
| $\sigma(N2-C5)$   | 1.98088                | $sp^{1.83}$ at N2<br>$sp^{2.05}$ at C5   | N2 (61.23%): $s(35.29\%)p(64.53\%)$<br>C5 (38.77%): $s(32.78\%)p(67.13\%)$   |
| $\sigma(N2-C6a)$  | 1.98370                | $sp^{2.10}$ at N2<br>$sp^{2.89}$ at C6a  | N2 (62.59%): $s(32.19\%)p(67.69\%)$<br>C6a (37.41%): $s(25.68\%)p(74.24\%)$  |
| $\sigma(N2-C6b)$  | 1.98397                | $sp^{2.09}$ at N2<br>$sp^{2.82}$ at C6b  | N2 (62.47%): $s(32.35\%)p(67.53\%)$<br>C6b (37.53%): $s(26.19\%)p(73.73\%)$  |
| Lone pair 1 (N3)  | 1.66902                | n/a                                      | $s(2.32\%)p(97.60\%)$                                                        |
| $\sigma(N3-C5)$   | 1.97996                | $sp^{1.82}$ at N3<br>$sp^{2.12}$ at C5   | N3 (61.17%): $s(35.43\%)p(64.36\%)$<br>C5 (38.83%): $s(32.07\%)p(67.83\%)$   |
| $\sigma(N3-C7a)$  | 1.98130                | $sp^{2.23}$ at N3<br>$sp^{2.90}$ at C7a  | N3 (62.60%): $s(30.88\%)p(68.99\%)$<br>C7a (37.40%): $s(25.60\%)p(74.32\%)$  |
| $\sigma(N3-C7b)$  | 1.98601                | $sp^{2.20}$ at N3<br>$sp^{2.91}$ at C7b  | N3 (62.49%): $s(31.19\%)p(68.68\%)$<br>C7b (37.65%): $s(25.58\%)p(74.34\%)$  |
| $\sigma(C11-C12)$ | 1.97794                | $sp^{1.75}$ at C11<br>$sp^{1.78}$ at C12 | C11 (50.80%): $s(36.35\%)p(63.54\%)$<br>C12 (49.20%): $s(35.93\%)p(63.90\%)$ |
| $\pi(C11-C12)$    | 1.66333                | n/a                                      | C11 (47.40%): $s(0.01\%)p(99.91\%)$<br>C12 (52.60%): $s(0.01\%)p(99.90\%)$   |
| $\sigma(C11-C10)$ | 1.97327                | $sp^{1.95}$ at C10<br>$sp^{2.15}$ at C11 | C10 (50.79%): $s(33.91\%)p(65.99\%)$<br>C11 (49.21%): $s(31.74\%)p(68.14\%)$ |
| Lone pair 1 (N4)  | 1.88658                | $sp^{2.75}$                              | $s(26.69\%)p(73.29\%)$                                                       |
| $\sigma(N4-C9)$   | 1.98872                | $sp^{1.57}$ at N4<br>$sp^{1.93}$ at C9   | N4 (60.11%): $s(38.81\%)p(60.82\%)$<br>C9 (39.89%): $s(34.04\%)p(65.85\%)$   |
| $\pi(N4-C9)$      | 1.86154                | n/a                                      | N4 (64.78%): $s(0.00\%)p(99.80\%)$<br>C9 (35.22%): $s(0.00\%)p(99.84\%)$     |
| $\sigma(N4-C10)$  | 1.98273                | $sp^{1.90}$ at N4<br>$sp^{2.28}$ at C10  | N4 (58.90%): $s(34.37\%)p(65.30\%)$<br>C10 (41.10%): $s(30.43\%)p(69.48\%)$  |

<sup>a</sup> Calculated in solution at the optimized S0 geometry using M06-2X (gas phase/ def2-tzvpp def2/j). The M06-2X functional uses 54 % Hartree-Fock exchange.<sup>23</sup>

<sup>b</sup> The general formulation of a sigma natural bond orbital (NBO) is  $\sigma_{AB} = c_A h_A + c_B h_B$ , where  $h_A$  and  $h_B$  are the atom-centered hybrid orbitals of atoms A and B, and  $c_A$  and  $c_B$  are the normalized polarization coefficients of atoms A and B. If the natural ionicity of an NBO, given by  $i_{AB} = \frac{(c_A^2 - c_B^2)}{(c_A^2 + c_B^2)}$ , exceeds a fixed limit ( $|i_{AB}| > 0.95$ ), this extremely polarized “bond” is identified instead as a lone pair.<sup>20</sup>

<sup>c</sup> Orbital occupancy ( $0 \leq x \leq 2$ ) is the number of electrons in the specified NBO. Lower orbital occupancy values are indicative of stronger delocalization.<sup>20</sup>

<sup>d</sup> Hybridization of a given NBO is of the form  $sp^\lambda$ , where  $\lambda = \left(\frac{\%p}{\%s}\right)$ .<sup>20</sup> Hybridizations with a very high value of  $\lambda$  (for example,  $sp^\infty$ ) have been denoted as non-applicable.

<sup>e</sup> Atomic orbital contributions denote the percent contribution of s, p, d, and f orbitals from atom A, and the percent contribution of s, p, d, and f orbitals from atom B, to their shared NBO  $\sigma_{AB}$  or  $\pi_{AB}$ .<sup>20</sup> Contributions from d and f orbitals are negligible and are omitted for simplicity. The percent contributions from each atom A ( $c_A^2 \times 100\%$ ) and B ( $c_B^2 \times 100\%$ ) to their shared NBO are also shown.

**Table S49.** Solvated NBO analysis<sup>a</sup> of (CF<sub>3</sub>L1)ZnCl<sub>2</sub> with the CAM-B3LYP functional.

| NBO <sup>b</sup>  | Occupancy <sup>c</sup> | Hybridization <sup>d</sup>               | Atomic Orbital Contributions (%) <sup>e</sup>                                |
|-------------------|------------------------|------------------------------------------|------------------------------------------------------------------------------|
| Lone pair 1 (N1)  | 1.84325                | $sp^{2.73}$                              | $s(26.80\%)p(73.11\%)$                                                       |
| $\sigma(N1-C5)$   | 1.98195                | $sp^{1.70}$ at N1<br>$sp^{1.87}$ at C5   | N1 (59.01%): $s(36.87\%)p(62.75\%)$<br>C5 (40.99%): $s(34.86\%)p(65.02\%)$   |
| $\pi(N1-C5)$      | 1.87117                | n/a                                      | N1 (76.90%): $s(0.14\%)p(99.73\%)$<br>C5 (23.10%): $s(0.18\%)p(99.59\%)$     |
| $\sigma(N1-C11)$  | 1.98172                | $sp^{1.76}$ at N1<br>$sp^{2.14}$ at C11  | N1 (58.66%): $s(36.07\%)p(63.59\%)$<br>C11 (41.34%): $s(31.81\%)p(68.08\%)$  |
| Lone pair 1 (N2)  | 1.68996                | n/a                                      | $s(0.00\%)p(99.94\%)$                                                        |
| $\sigma(N2-C5)$   | 1.98132                | $sp^{1.83}$ at N2<br>$sp^{2.05}$ at C5   | N2 (61.09%): $s(35.30\%)p(64.50\%)$<br>C5 (38.91%): $s(32.77\%)p(67.10\%)$   |
| $\sigma(N2-C6a)$  | 1.98434                | $sp^{2.10}$ at N2<br>$sp^{2.88}$ at C6a  | N2 (62.34%): $s(32.17\%)p(67.69\%)$<br>C6a (37.66%): $s(25.74\%)p(74.15\%)$  |
| $\sigma(N2-C6b)$  | 1.98469                | $sp^{2.09}$ at N2<br>$sp^{2.81}$ at C6b  | N2 (62.22%): $s(32.35\%)p(67.52\%)$<br>C6b (37.78%): $s(26.25\%)p(73.65\%)$  |
| Lone pair 1 (N3)  | 1.67036                | n/a                                      | $s(2.22\%)p(97.71\%)$                                                        |
| $\sigma(N3-C5)$   | 1.98028                | $sp^{1.81}$ at N3<br>$sp^{2.11}$ at C5   | N3 (61.03%): $s(35.45\%)p(64.33\%)$<br>C5 (38.97%): $s(32.08\%)p(67.80\%)$   |
| $\sigma(N3-C7a)$  | 1.98223                | $sp^{2.23}$ at N3<br>$sp^{2.89}$ at C7a  | N3 (62.34%): $s(30.92\%)p(68.94\%)$<br>C7a (37.66%): $s(25.68\%)p(74.22\%)$  |
| $\sigma(N3-C7b)$  | 1.98651                | $sp^{2.20}$ at N3<br>$sp^{2.89}$ at C7b  | N3 (62.26%): $s(31.23\%)p(68.62\%)$<br>C7b (37.74%): $s(25.65\%)p(74.24\%)$  |
| $\sigma(C11-C12)$ | 1.97762                | $sp^{1.75}$ at C11<br>$sp^{1.78}$ at C12 | C11 (50.77%): $s(36.33\%)p(63.55\%)$<br>C12 (49.23%): $s(35.94\%)p(63.87\%)$ |
| $\pi(C11-C12)$    | 1.66358                | n/a                                      | C11 (47.26%): $s(0.01\%)p(99.90\%)$<br>C12 (52.74%): $s(0.01\%)p(99.90\%)$   |
| $\sigma(C11-C10)$ | 1.97330                | $sp^{1.94}$ at C10<br>$sp^{2.14}$ at C11 | C10 (50.79%): $s(33.92\%)p(65.96\%)$<br>C11 (49.21%): $s(31.77\%)p(68.10\%)$ |
| Lone pair 1 (N4)  | 1.87784                | $sp^{2.78}$                              | $s(26.46\%)p(73.52\%)$                                                       |
| $\sigma(N4-C9)$   | 1.98854                | $sp^{1.56}$ at N4<br>$sp^{1.93}$ at C9   | N1 (59.96%): $s(38.89\%)p(60.72\%)$<br>C5 (40.04%): $s(34.09\%)p(65.77\%)$   |
| $\pi(N4-C9)$      | 1.86320                | n/a                                      | N1 (65.06%): $s(0.00\%)p(99.82\%)$<br>C5 (34.94%): $s(0.00\%)p(99.85\%)$     |
| $\sigma(N4-C10)$  | 1.98294                | $sp^{1.89}$ at N4<br>$sp^{2.29}$ at C10  | N4 (58.83%): $s(34.51\%)p(65.14\%)$<br>C10 (41.17%): $s(30.41\%)p(69.49\%)$  |

<sup>a</sup> Calculated in solution at the optimized S0 geometry using CAM-B3LYP (gas phase/ def2-tzvpp def2/j). The CAM-B3LYP functional is a range-separated functional, and uses 19 % Hartree-Fock exchange at short range, 33 % Hartree-Fock exchange at intermediate range, and 65 % Hartree-Fock exchange at long range.<sup>15</sup>

<sup>b</sup> The general formulation of a sigma natural bond orbital (NBO) is  $\sigma_{AB} = c_A h_A + c_B h_B$ , where  $h_A$  and  $h_B$  are the atom-centered hybrid orbitals of atoms A and B, and  $c_A$  and  $c_B$  are the normalized polarization coefficients of atoms A and B. If the natural ionicity of an NBO, given by  $i_{AB} = \frac{(c_A^2 - c_B^2)}{(c_A^2 + c_B^2)}$ , exceeds a fixed limit ( $|i_{AB}| > 0.95$ ), this extremely polarized “bond” is identified instead as a lone pair.<sup>20</sup>

<sup>c</sup> Orbital occupancy ( $0 \leq x \leq 2$ ) is the number of electrons in the specified NBO. Lower orbital occupancy values are indicative of stronger delocalization.<sup>20</sup>

<sup>d</sup> Hybridization of a given NBO is of the form  $sp^\lambda$ , where  $\lambda = (\frac{\%p}{\%s})$ .<sup>20</sup> Hybridizations with a very high value of  $\lambda$  (for example,  $sp^\infty$ ) have been denoted as non-applicable.

<sup>e</sup> Atomic orbital contributions denote the percent contribution of s, p, d, and f orbitals from atom A, and the percent contribution of s, p, d, and f orbitals from atom B, to their shared NBO  $\sigma_{AB}$  or  $\pi_{AB}$ .<sup>20</sup> Contributions from d and f orbitals are negligible and are omitted for simplicity. The percent contributions from each atom A ( $c_A^2 \times 100\%$ ) and B ( $c_B^2 \times 100\%$ ) to their shared NBO are also shown.

**Table S50.** NBO analysis<sup>a</sup> of (<sup>t</sup>BuL1)ZnCl<sub>2</sub> with the M06-L functional.

| NBO <sup>b</sup>  | Occupancy <sup>c</sup> | Hybridization <sup>d</sup>               | Atomic Orbital Contributions (%) <sup>e</sup>                                |
|-------------------|------------------------|------------------------------------------|------------------------------------------------------------------------------|
| Lone pair 1 (N1)  | 1.83269                | $sp^{2.29}$                              | $s(30.35\%)p(69.56\%)$                                                       |
| $\sigma(N1-C5)$   | 1.98071                | $sp^{1.84}$ at N1<br>$sp^{1.84}$ at C5   | N1 (59.02%): $s(35.14\%)p(64.53\%)$<br>C5 (40.98%): $s(35.20\%)p(64.71\%)$   |
| $\pi(N1-C5)$      | 1.86750                | n/a                                      | N1 (73.65%): $s(0.19\%)p(99.67\%)$<br>C5 (26.35%): $s(0.35\%)p(99.44\%)$     |
| $\sigma(N1-C11)$  | 1.97991                | $sp^{1.92}$ at N1<br>$sp^{2.21}$ at C11  | N1 (59.03%): $s(34.19\%)p(65.53\%)$<br>C11 (40.97%): $s(31.14\%)p(68.77\%)$  |
| Lone pair 1 (N2)  | 1.68704                | n/a                                      | $s(0.00\%)p(99.95\%)$                                                        |
| $\sigma(N2-C5)$   | 1.98083                | $sp^{1.81}$ at N2<br>$sp^{2.09}$ at C5   | N2 (61.47%): $s(35.57\%)p(64.27\%)$<br>C5 (38.53%): $s(32.29\%)p(67.61\%)$   |
| $\sigma(N2-C6a)$  | 1.98303                | $sp^{2.10}$ at N2<br>$sp^{2.88}$ at C6a  | N2 (62.12%): $s(32.20\%)p(67.69\%)$<br>C6a (37.88%): $s(25.78\%)p(74.15\%)$  |
| $\sigma(N2-C6b)$  | 1.98462                | $sp^{2.11}$ at N2<br>$sp^{2.75}$ at C6b  | N2 (61.49%): $s(32.10\%)p(67.78\%)$<br>C6b (38.51%): $s(26.64\%)p(73.29\%)$  |
| Lone pair 1 (N3)  | 1.65904                | n/a                                      | $s(3.20\%)p(96.73\%)$                                                        |
| $\sigma(N3-C5)$   | 1.97958                | $sp^{1.82}$ at N3<br>$sp^{2.11}$ at C5   | N3 (61.23%): $s(35.36\%)p(64.45\%)$<br>C5 (38.77%): $s(32.09\%)p(67.82\%)$   |
| $\sigma(N3-C7a)$  | 1.97991                | $sp^{2.29}$ at N3<br>$sp^{2.87}$ at C7a  | N3 (61.92%): $s(30.33\%)p(69.55\%)$<br>C7a (38.08%): $s(25.85\%)p(74.09\%)$  |
| $\sigma(N3-C7b)$  | 1.98482                | $sp^{2.23}$ at N3<br>$sp^{2.91}$ at C7b  | N3 (62.15%): $s(30.96\%)p(68.92\%)$<br>C7b (37.85%): $s(25.57\%)p(74.36\%)$  |
| $\sigma(C11-C12)$ | 1.97726                | $sp^{1.71}$ at C11<br>$sp^{1.82}$ at C12 | C11 (50.84%): $s(36.82\%)p(63.07\%)$<br>C12 (49.16%): $s(35.45\%)p(64.37\%)$ |
| $\pi(C11-C12)$    | 1.67213                | n/a                                      | C11 (46.62%): $s(0.03\%)p(99.88\%)$<br>C12 (53.38%): $s(0.02\%)p(99.89\%)$   |
| $\sigma(C11-C10)$ | 1.97156                | $sp^{1.93}$ at C10<br>$sp^{2.13}$ at C11 | C10 (50.74%): $s(34.08\%)p(65.79\%)$<br>C11 (49.26%): $s(31.95\%)p(67.92\%)$ |
| Lone pair 1 (N4)  | 1.87040                | $sp^{2.44}$                              | $s(29.07\%)p(70.91\%)$                                                       |
| $\sigma(N4-C9)$   | 1.98868                | $sp^{1.65}$ at N4<br>$sp^{1.91}$ at C9   | N4 (59.91%): $s(37.66\%)p(62.00\%)$<br>C9 (40.09%): $s(34.31\%)p(65.59\%)$   |
| $\pi(N4-C9)$      | 1.85216                | n/a                                      | N4 (64.03%): $s(0.00\%)p(99.82\%)$<br>C9 (36.97%): $s(0.00\%)p(99.86\%)$     |
| $\sigma(N4-C10)$  | 1.98137                | $sp^{2.01}$ at N4<br>$sp^{2.29}$ at C10  | N4 (58.97%): $s(33.13\%)p(66.58\%)$<br>C10 (41.03%): $s(30.34\%)p(69.57\%)$  |

<sup>a</sup> Calculated in gas phase at the optimized S0 geometry using M06-L (gas phase/ def2-tzvpp def2/j). The M06-L functional uses 0 % Hartree-Fock exchange.<sup>19</sup>

<sup>b</sup> The general formulation of a sigma natural bond orbital (NBO) is  $\sigma_{AB} = c_A h_A + c_B h_B$ , where  $h_A$  and  $h_B$  are the atom-centered hybrid orbitals of atoms A and B, and  $c_A$  and  $c_B$  are the normalized polarization coefficients of atoms A and B. If the natural ionicity of an NBO, given by  $i_{AB} = \frac{(c_A^2 - c_B^2)}{(c_A^2 + c_B^2)}$ , exceeds a fixed limit ( $|i_{AB}| > 0.95$ ), this extremely polarized “bond” is identified instead as a lone pair.<sup>20</sup>

<sup>c</sup> Orbital occupancy ( $0 \leq x \leq 2$ ) is the number of electrons in the specified NBO. Lower orbital occupancy values are indicative of stronger delocalization.<sup>20</sup>

<sup>d</sup> Hybridization of a given NBO is of the form  $sp^\lambda$ , where  $\lambda = \left(\frac{\%p}{\%s}\right)$ .<sup>20</sup> Hybridizations with a very high value of  $\lambda$  (for example,  $sp^\infty$ ) have been denoted as non-applicable.

<sup>e</sup> Atomic orbital contributions denote the percent contribution of s, p, d, and f orbitals from atom A, and the percent contribution of s, p, d, and f orbitals from atom B, to their shared NBO  $\sigma_{AB}$  or  $\pi_{AB}$ .<sup>20</sup> Contributions from d and f orbitals are negligible and are omitted for simplicity. The percent contributions from each atom A ( $c_A^2 \times 100\%$ ) and B ( $c_B^2 \times 100\%$ ) to their shared NBO are also shown.

**Table S51.** NBO analysis<sup>a</sup> of (<sup>t</sup>BuL1)ZnCl<sub>2</sub> with the TPSSh functional.

| NBO <sup>b</sup>  | Occupancy <sup>c</sup> | Hybridization <sup>d</sup>               | Atomic Orbital Contributions (%) <sup>e</sup>                                |
|-------------------|------------------------|------------------------------------------|------------------------------------------------------------------------------|
| Lone pair 1 (N1)  | 1.83320                | $sp^{2.49}$                              | $s(28.61\%)p(71.31\%)$                                                       |
| $\sigma(N1-C5)$   | 1.98120                | $sp^{1.76}$ at N1<br>$sp^{1.84}$ at C5   | N1 (58.83%): $s(36.14\%)p(63.50\%)$<br>C5 (41.17%): $s(35.15\%)p(64.74\%)$   |
| $\pi(N1-C5)$      | 1.86941                | n/a                                      | N1 (73.79%): $s(0.18\%)p(99.69\%)$<br>C5 (26.21%): $s(0.29\%)p(99.51\%)$     |
| $\sigma(N1-C11)$  | 1.98039                | $sp^{1.85}$ at N1<br>$sp^{2.20}$ at C11  | N1 (58.76%): $s(34.96\%)p(64.73\%)$<br>C11 (41.24%): $s(31.26\%)p(68.64\%)$  |
| Lone pair 1 (N2)  | 1.68732                | n/a                                      | $s(0.00\%)p(99.95\%)$                                                        |
| $\sigma(N2-C5)$   | 1.98098                | $sp^{1.81}$ at N2<br>$sp^{2.08}$ at C5   | N2 (61.34%): $s(35.58\%)p(64.24\%)$<br>C5 (38.66%): $s(32.40\%)p(67.49\%)$   |
| $\sigma(N2-C6a)$  | 1.98332                | $sp^{2.10}$ at N2<br>$sp^{2.90}$ at C6a  | N2 (62.37%): $s(32.18\%)p(67.70\%)$<br>C6a (37.63%): $s(25.65\%)p(74.26\%)$  |
| $\sigma(N2-C6b)$  | 1.98498                | $sp^{2.11}$ at N2<br>$sp^{2.76}$ at C6b  | N2 (61.68%): $s(32.08\%)p(67.79\%)$<br>C6b (38.32%): $s(26.54\%)p(73.37\%)$  |
| Lone pair 1 (N3)  | 1.65808                | n/a                                      | $s(2.91\%)p(97.03\%)$                                                        |
| $\sigma(N3-C5)$   | 1.97965                | $sp^{1.81}$ at N3<br>$sp^{2.11}$ at C5   | N3 (61.09%): $s(35.46\%)p(64.34\%)$<br>C5 (38.91%): $s(32.07\%)p(67.82\%)$   |
| $\sigma(N3-C7a)$  | 1.98062                | $sp^{2.28}$ at N3<br>$sp^{2.88}$ at C7a  | N3 (62.14%): $s(30.42\%)p(69.45\%)$<br>C7a (37.86%): $s(25.72\%)p(74.19\%)$  |
| $\sigma(N3-C7b)$  | 1.98534                | $sp^{2.22}$ at N3<br>$sp^{2.93}$ at C7b  | N3 (62.42%): $s(31.06\%)p(68.81\%)$<br>C7b (37.58%): $s(25.44\%)p(74.47\%)$  |
| $\sigma(C11-C12)$ | 1.97670                | $sp^{1.71}$ at C11<br>$sp^{1.83}$ at C12 | C11 (50.98%): $s(36.82\%)p(63.07\%)$<br>C12 (49.02%): $s(35.33\%)p(64.49\%)$ |
| $\pi(C11-C12)$    | 1.67280                | n/a                                      | C11 (47.19%): $s(0.02\%)p(99.89\%)$<br>C12 (52.81%): $s(0.02\%)p(99.90\%)$   |
| $\sigma(C11-C10)$ | 1.97149                | $sp^{1.93}$ at C10<br>$sp^{2.14}$ at C11 | C10 (50.78%): $s(34.04\%)p(65.85\%)$<br>C11 (49.22%): $s(31.82\%)p(68.05\%)$ |
| Lone pair 1 (N4)  | 1.87078                | $sp^{2.59}$                              | $s(27.87\%)p(72.11\%)$                                                       |
| $\sigma(N4-C9)$   | 1.98873                | $sp^{1.60}$ at N4<br>$sp^{1.91}$ at C9   | N4 (59.83%): $s(38.25\%)p(61.38\%)$<br>C9 (40.17%): $s(34.29\%)p(65.59\%)$   |
| $\pi(N4-C9)$      | 1.85227                | n/a                                      | N4 (63.12%): $s(0.00\%)p(99.83\%)$<br>C9 (36.88%): $s(0.00\%)p(99.86\%)$     |
| $\sigma(N4-C10)$  | 1.98209                | $sp^{1.95}$ at N4<br>$sp^{2.28}$ at C10  | N4 (58.74%): $s(33.74\%)p(65.94\%)$<br>C10 (41.26%): $s(30.42\%)p(69.48\%)$  |

<sup>a</sup> Calculated in gas phase at the optimized S0 geometry using TPSSh (gas phase/ def2-tzvpp def2/j). The TPSSh functional uses 10 % Hartree-Fock exchange.<sup>11</sup>

<sup>b</sup> The general formulation of a sigma natural bond orbital (NBO) is  $\sigma_{AB} = c_A h_A + c_B h_B$ , where  $h_A$  and  $h_B$  are the atom-centered hybrid orbitals of atoms A and B, and  $c_A$  and  $c_B$  are the normalized polarization coefficients of atoms A and B. If the natural ionicity of an NBO, given by  $i_{AB} = \frac{(c_A^2 - c_B^2)}{(c_A^2 + c_B^2)}$ , exceeds a fixed limit ( $|i_{AB}| > 0.95$ ), this extremely polarized “bond” is identified instead as a lone pair.<sup>20</sup>

<sup>c</sup> Orbital occupancy ( $0 \leq x \leq 2$ ) is the number of electrons in the specified NBO. Lower orbital occupancy values are indicative of stronger delocalization.<sup>20</sup>

<sup>d</sup> Hybridization of a given NBO is of the form  $sp^\lambda$ , where  $\lambda = \left(\frac{\%p}{\%s}\right)$ .<sup>20</sup> Hybridizations with a very high value of  $\lambda$  (for example,  $sp^\infty$ ) have been denoted as non-applicable.

<sup>e</sup> Atomic orbital contributions denote the percent contribution of s, p, d, and f orbitals from atom A, and the percent contribution of s, p, d, and f orbitals from atom B, to their shared NBO  $\sigma_{AB}$  or  $\pi_{AB}$ .<sup>20</sup> Contributions from d and f orbitals are negligible and are omitted for simplicity. The percent contributions from each atom A ( $c_A^2 \times 100\%$ ) and B ( $c_B^2 \times 100\%$ ) to their shared NBO are also shown.

**Table S52.** NBO analysis<sup>a</sup> of (<sup>t</sup>BuL1)ZnCl<sub>2</sub> with the O3LYP functional.

| NBO <sup>b</sup>  | Occupancy <sup>c</sup> | Hybridization <sup>d</sup>               | Atomic Orbital Contributions (%) <sup>e</sup>                                |
|-------------------|------------------------|------------------------------------------|------------------------------------------------------------------------------|
| Lone pair 1 (N1)  | 1.83085                | $sp^{2.51}$                              | $s(28.43\%)p(71.47\%)$                                                       |
| $\sigma(N1-C5)$   | 1.98116                | $sp^{1.75}$ at N1<br>$sp^{1.84}$ at C5   | N1 (58.68%): $s(36.23\%)p(63.41\%)$<br>C5 (41.32%): $s(35.12\%)p(64.77\%)$   |
| $\pi(N1-C5)$      | 1.86849                | n/a                                      | N1 (73.59%): $s(0.16\%)p(99.71\%)$<br>C5 (26.41%): $s(0.28\%)p(99.53\%)$     |
| $\sigma(N1-C11)$  | 1.98030                | $sp^{1.84}$ at N1<br>$sp^{2.19}$ at C11  | N1 (58.59%): $s(35.05\%)p(64.65\%)$<br>C11 (41.41%): $s(31.32\%)p(68.59\%)$  |
| Lone pair 1 (N2)  | 1.68491                | n/a                                      | $s(0.00\%)p(99.95\%)$                                                        |
| $\sigma(N2-C5)$   | 1.98081                | $sp^{1.81}$ at N2<br>$sp^{2.08}$ at C5   | N2 (61.19%): $s(35.52\%)p(64.31\%)$<br>C5 (38.81%): $s(32.46\%)p(67.44\%)$   |
| $\sigma(N2-C6a)$  | 1.98348                | $sp^{2.10}$ at N2<br>$sp^{2.88}$ at C6a  | N2 (62.11%): $s(32.19\%)p(67.69\%)$<br>C6a (37.89%): $s(25.74\%)p(74.18\%)$  |
| $\sigma(N2-C6b)$  | 1.98516                | $sp^{2.11}$ at N2<br>$sp^{2.75}$ at C6b  | N2 (61.45%): $s(32.13\%)p(67.75\%)$<br>C6b (38.55%): $s(26.62\%)p(73.30\%)$  |
| Lone pair 1 (N3)  | 1.65568                | n/a                                      | $s(2.81\%)p(97.13\%)$                                                        |
| $\sigma(N3-C5)$   | 1.97957                | $sp^{1.82}$ at N3<br>$sp^{2.12}$ at C5   | N3 (60.96%): $s(35.42\%)p(64.38\%)$<br>C5 (39.04%): $s(32.05\%)p(67.84\%)$   |
| $\sigma(N3-C7a)$  | 1.98101                | $sp^{2.27}$ at N3<br>$sp^{2.87}$ at C7a  | N3 (61.88%): $s(30.51\%)p(69.37\%)$<br>C7a (38.12%): $s(25.80\%)p(74.11\%)$  |
| $\sigma(N3-C7b)$  | 1.98538                | $sp^{2.21}$ at N3<br>$sp^{2.91}$ at C7b  | N3 (62.16%): $s(31.10\%)p(68.78\%)$<br>C7b (37.84%): $s(25.53\%)p(74.38\%)$  |
| $\sigma(C11-C12)$ | 1.97630                | $sp^{1.71}$ at C11<br>$sp^{1.83}$ at C12 | C11 (50.97%): $s(36.80\%)p(63.10\%)$<br>C12 (49.03%): $s(35.28\%)p(64.55\%)$ |
| $\pi(C11-C12)$    | 1.67176                | n/a                                      | C11 (47.24%): $s(0.02\%)p(99.90\%)$<br>C12 (52.76%): $s(0.02\%)p(99.90\%)$   |
| $\sigma(C11-C10)$ | 1.97106                | $sp^{1.94}$ at C10<br>$sp^{2.14}$ at C11 | C10 (50.76%): $s(33.99\%)p(65.91\%)$<br>C11 (49.24%): $s(31.79\%)p(68.09\%)$ |
| Lone pair 1 (N4)  | 1.86882                | $sp^{2.60}$                              | $s(27.75\%)p(72.23\%)$                                                       |
| $\sigma(N4-C9)$   | 1.98856                | $sp^{1.60}$ at N4<br>$sp^{1.91}$ at C9   | N4 (59.71%): $s(38.35\%)p(61.29\%)$<br>C9 (40.29%): $s(34.29\%)p(65.59\%)$   |
| $\pi(N4-C9)$      | 1.85325                | n/a                                      | N4 (63.06%): $s(0.00\%)p(99.83\%)$<br>C9 (36.94%): $s(0.00\%)p(99.87\%)$     |
| $\sigma(N4-C10)$  | 1.98187                | $sp^{1.95}$ at N4<br>$sp^{2.28}$ at C10  | N4 (58.58%): $s(33.76\%)p(65.93\%)$<br>C10 (41.42%): $s(30.49\%)p(69.42\%)$  |

<sup>a</sup> Calculated in gas phase at the optimized S0 geometry using O3LYP (gas phase/ def2-tzvpp def2/j). The O3LYP functional uses 11.61 % Hartree-Fock exchange.<sup>21</sup>

<sup>b</sup> The general formulation of a sigma natural bond orbital (NBO) is  $\sigma_{AB} = c_A h_A + c_B h_B$ , where  $h_A$  and  $h_B$  are the atom-centered hybrid orbitals of atoms A and B, and  $c_A$  and  $c_B$  are the normalized polarization coefficients of atoms A and B. If the natural ionicity of an NBO, given by  $i_{AB} = \frac{(c_A^2 - c_B^2)}{(c_A^2 + c_B^2)}$ , exceeds a fixed limit ( $|i_{AB}| > 0.95$ ), this extremely polarized “bond” is identified instead as a lone pair.<sup>20</sup>

<sup>c</sup> Orbital occupancy ( $0 \leq x \leq 2$ ) is the number of electrons in the specified NBO. Lower orbital occupancy values are indicative of stronger delocalization.<sup>20</sup>

<sup>d</sup> Hybridization of a given NBO is of the form  $sp^\lambda$ , where  $\lambda = \left(\frac{\%p}{\%s}\right)$ .<sup>20</sup> Hybridizations with a very high value of  $\lambda$  (for example,  $sp^\infty$ ) have been denoted as non-applicable.

<sup>e</sup> Atomic orbital contributions denote the percent contribution of s, p, d, and f orbitals from atom A, and the percent contribution of s, p, d, and f orbitals from atom B, to their shared NBO  $\sigma_{AB}$  or  $\pi_{AB}$ .<sup>20</sup> Contributions from d and f orbitals are negligible and are omitted for simplicity. The percent contributions from each atom A ( $c_A^2 \times 100\%$ ) and B ( $c_B^2 \times 100\%$ ) to their shared NBO are also shown.

**Table S53.** NBO analysis<sup>a</sup> of (<sup>t</sup>BuL1)ZnCl<sub>2</sub> with the B3LYP functional.

| NBO <sup>b</sup>  | Occupancy <sup>c</sup> | Hybridization <sup>d</sup>               | Atomic Orbital Contributions (%) <sup>e</sup>                                |
|-------------------|------------------------|------------------------------------------|------------------------------------------------------------------------------|
| Lone pair 1 (N1)  | 1.83631                | $sp^{2.56}$                              | $s(28.07\%)p(71.84\%)$                                                       |
| $\sigma(N1-C5)$   | 1.98142                | $sp^{1.74}$ at N1<br>$sp^{1.85}$ at C5   | N1 (58.79%): $s(36.38\%)p(63.25\%)$<br>C5 (41.21%): $s(35.10\%)p(64.78\%)$   |
| $\pi(N1-C5)$      | 1.87368                | n/a                                      | N1 (74.28%): $s(0.17\%)p(99.70\%)$<br>C5 (25.72%): $s(0.26\%)p(99.55\%)$     |
| $\sigma(N1-C11)$  | 1.98071                | $sp^{1.83}$ at N1<br>$sp^{2.19}$ at C11  | N1 (58.73%): $s(35.26\%)p(64.42\%)$<br>C11 (41.27%): $s(31.29\%)p(68.60\%)$  |
| Lone pair 1 (N2)  | 1.69436                | n/a                                      | $s(0.00\%)p(99.95\%)$                                                        |
| $\sigma(N2-C5)$   | 1.98113                | $sp^{1.81}$ at N2<br>$sp^{2.08}$ at C5   | N2 (61.31%): $s(35.48\%)p(64.33\%)$<br>C5 (38.69%): $s(32.47\%)p(67.41\%)$   |
| $\sigma(N2-C6a)$  | 1.98380                | $sp^{2.10}$ at N2<br>$sp^{2.87}$ at C6a  | N2 (62.25%): $s(32.20\%)p(67.67\%)$<br>C6a (37.75%): $s(25.80\%)p(74.10\%)$  |
| $\sigma(N2-C6b)$  | 1.98539                | $sp^{2.11}$ at N2<br>$sp^{2.75}$ at C6b  | N2 (61.60%): $s(32.15\%)p(67.72\%)$<br>C6b (38.40%): $s(26.67\%)p(73.24\%)$  |
| Lone pair 1 (N3)  | 1.66500                | n/a                                      | $s(2.71\%)p(97.23\%)$                                                        |
| $\sigma(N3-C5)$   | 1.97988                | $sp^{1.82}$ at N3<br>$sp^{2.11}$ at C5   | N3 (61.07%): $s(35.40\%)p(64.39\%)$<br>C5 (38.93%): $s(32.07\%)p(67.81\%)$   |
| $\sigma(N3-C7a)$  | 1.98151                | $sp^{2.27}$ at N3<br>$sp^{2.86}$ at C7a  | N3 (62.05%): $s(30.57\%)p(69.30\%)$<br>C7a (37.95%): $s(25.86\%)p(74.04\%)$  |
| $\sigma(N3-C7b)$  | 1.98572                | $sp^{2.21}$ at N3<br>$sp^{2.90}$ at C7b  | N3 (62.32%): $s(31.15\%)p(68.71\%)$<br>C7b (37.68%): $s(25.60\%)p(74.30\%)$  |
| $\sigma(C11-C12)$ | 1.97664                | $sp^{1.71}$ at C11<br>$sp^{1.82}$ at C12 | C11 (50.96%): $s(36.80\%)p(63.09\%)$<br>C12 (49.04%): $s(35.33\%)p(64.47\%)$ |
| $\pi(C11-C12)$    | 1.67459                | n/a                                      | C11 (46.87%): $s(0.02\%)p(99.90\%)$<br>C12 (53.13%): $s(0.02\%)p(99.90\%)$   |
| $\sigma(C11-C10)$ | 1.97155                | $sp^{1.94}$ at C10<br>$sp^{2.14}$ at C11 | C10 (50.79%): $s(33.99\%)p(65.89\%)$<br>C11 (49.21%): $s(31.80\%)p(68.07\%)$ |
| Lone pair 1 (N4)  | 1.87345                | $sp^{2.67}$                              | $s(27.26\%)p(72.72\%)$                                                       |
| $\sigma(N4-C9)$   | 1.98850                | $sp^{1.58}$ at N4<br>$sp^{1.91}$ at C9   | N4 (59.80%): $s(38.57\%)p(61.04\%)$<br>C9 (40.20%): $s(34.33\%)p(65.53\%)$   |
| $\pi(N4-C9)$      | 1.85575                | n/a                                      | N4 (63.20%): $s(0.00\%)p(99.83\%)$<br>C9 (36.80%): $s(0.00\%)p(99.87\%)$     |
| $\sigma(N4-C10)$  | 1.98210                | $sp^{1.93}$ at N4<br>$sp^{2.28}$ at C10  | N4 (58.75%): $s(34.02\%)p(65.65\%)$<br>C10 (41.25%): $s(30.47\%)p(69.42\%)$  |

<sup>a</sup> Calculated in gas phase at the optimized S0 geometry using B3LYP (gas phase/ def2-tzvp def2/j). The B3LYP functional uses 20 % Hartree-Fock exchange.<sup>22</sup>

<sup>b</sup> The general formulation of a sigma natural bond orbital (NBO) is  $\sigma_{AB} = c_A h_A + c_B h_B$ , where  $h_A$  and  $h_B$  are the atom-centered hybrid orbitals of atoms A and B, and  $c_A$  and  $c_B$  are the normalized polarization coefficients of atoms A and B. If the natural ionicity of an NBO, given by  $i_{AB} = \frac{(c_A^2 - c_B^2)}{(c_A^2 + c_B^2)}$ , exceeds a fixed limit ( $|i_{AB}| > 0.95$ ), this extremely polarized “bond” is identified instead as a lone pair.<sup>20</sup>

<sup>c</sup> Orbital occupancy ( $0 \leq x \leq 2$ ) is the number of electrons in the specified NBO. Lower orbital occupancy values are indicative of stronger delocalization.<sup>20</sup>

<sup>d</sup> Hybridization of a given NBO is of the form  $sp^\lambda$ , where  $\lambda = \left(\frac{\%p}{\%s}\right)$ .<sup>20</sup> Hybridizations with a very high value of  $\lambda$  (for example,  $sp^\infty$ ) have been denoted as non-applicable.

<sup>e</sup> Atomic orbital contributions denote the percent contribution of s, p, d, and f orbitals from atom A, and the percent contribution of s, p, d, and f orbitals from atom B, to their shared NBO  $\sigma_{AB}$  or  $\pi_{AB}$ .<sup>20</sup> Contributions from d and f orbitals are negligible and are omitted for simplicity. The percent contributions from each atom A ( $c_A^2 \times 100\%$ ) and B ( $c_B^2 \times 100\%$ ) to their shared NBO are also shown.

**Table S54.** NBO analysis<sup>a</sup> of (<sup>t</sup>BuL1)ZnCl<sub>2</sub> with the PBE0 functional.

| NBO <sup>b</sup>  | Occupancy <sup>c</sup> | Hybridization <sup>d</sup>               | Atomic Orbital Contributions (%) <sup>e</sup>                                |
|-------------------|------------------------|------------------------------------------|------------------------------------------------------------------------------|
| Lone pair 1 (N1)  | 1.83821                | $sp^{2.57}$                              | $s(28.00\%)p(71.90\%)$                                                       |
| $\sigma(N1-C5)$   | 1.98154                | $sp^{1.73}$ at N1<br>$sp^{1.85}$ at C5   | N1 (58.82%): $s(36.43\%)p(63.18\%)$<br>C5 (41.18%): $s(35.10\%)p(64.79\%)$   |
| $\pi(N1-C5)$      | 1.87417                | n/a                                      | N1 (74.57%): $s(0.18\%)p(99.68\%)$<br>C5 (25.43%): $s(0.27\%)p(99.52\%)$     |
| $\sigma(N1-C11)$  | 1.98076                | $sp^{1.83}$ at N1<br>$sp^{2.19}$ at C11  | N1 (58.66%): $s(35.25\%)p(64.42\%)$<br>C11 (41.34%): $s(31.31\%)p(68.59\%)$  |
| Lone pair 1 (N2)  | 1.69507                | n/a                                      | $s(0.00\%)p(99.95\%)$                                                        |
| $\sigma(N2-C5)$   | 1.98121                | $sp^{1.81}$ at N2<br>$sp^{2.08}$ at C5   | N2 (61.32%): $s(35.52\%)p(64.29\%)$<br>C5 (38.68%): $s(32.46\%)p(67.42\%)$   |
| $\sigma(N2-C6a)$  | 1.98384                | $sp^{2.10}$ at N2<br>$sp^{2.88}$ at C6a  | N2 (62.23%): $s(32.20\%)p(67.67\%)$<br>C6a (37.77%): $s(25.74\%)p(74.16\%)$  |
| $\sigma(N2-C6b)$  | 1.98544                | $sp^{2.11}$ at N2<br>$sp^{2.75}$ at C6b  | N2 (61.55%): $s(32.12\%)p(67.75\%)$<br>C6b (38.45%): $s(26.63\%)p(73.28\%)$  |
| Lone pair 1 (N3)  | 1.66633                | n/a                                      | $s(2.75\%)p(97.18\%)$                                                        |
| $\sigma(N3-C5)$   | 1.97995                | $sp^{1.82}$ at N3<br>$sp^{2.11}$ at C5   | N3 (61.08%): $s(35.43\%)p(64.35\%)$<br>C5 (38.92%): $s(32.07\%)p(67.81\%)$   |
| $\sigma(N3-C7a)$  | 1.98149                | $sp^{2.27}$ at N3<br>$sp^{2.87}$ at C7a  | N3 (62.00%): $s(30.55\%)p(69.32\%)$<br>C7a (38.00%): $s(25.81\%)p(74.10\%)$  |
| $\sigma(N3-C7b)$  | 1.98577                | $sp^{2.21}$ at N3<br>$sp^{2.91}$ at C7b  | N3 (62.26%): $s(31.10\%)p(68.76\%)$<br>C7b (37.74%): $s(25.55\%)p(74.35\%)$  |
| $\sigma(C11-C12)$ | 1.97672                | $sp^{1.71}$ at C11<br>$sp^{1.83}$ at C12 | C11 (50.94%): $s(36.82\%)p(63.08\%)$<br>C12 (49.06%): $s(35.31\%)p(64.50\%)$ |
| $\pi(C11-C12)$    | 1.67573                | n/a                                      | C11 (46.89%): $s(0.02\%)p(99.89\%)$<br>C12 (53.11%): $s(0.02\%)p(99.90\%)$   |
| $\sigma(C11-C10)$ | 1.97175                | $sp^{1.94}$ at C10<br>$sp^{2.14}$ at C11 | C10 (50.81%): $s(34.02\%)p(65.87\%)$<br>C11 (49.19%): $s(31.78\%)p(68.09\%)$ |
| Lone pair 1 (N4)  | 1.87532                | $sp^{2.65}$                              | $s(27.39\%)p(72.59\%)$                                                       |
| $\sigma(N4-C9)$   | 1.98870                | $sp^{1.59}$ at N4<br>$sp^{1.91}$ at C9   | N4 (59.75%): $s(38.48\%)p(61.13\%)$<br>C9 (40.25%): $s(34.33\%)p(65.55\%)$   |
| $\pi(N4-C9)$      | 1.85662                | n/a                                      | N4 (63.30%): $s(0.00\%)p(99.82\%)$<br>C9 (36.70%): $s(0.00\%)p(99.86\%)$     |
| $\sigma(N4-C10)$  | 1.98225                | $sp^{1.93}$ at N4<br>$sp^{2.28}$ at C10  | N4 (58.66%): $s(33.98\%)p(65.68\%)$<br>C10 (41.34%): $s(30.46\%)p(69.44\%)$  |

<sup>a</sup> Calculated in gas phase at the optimized S0 geometry using PBE0 (gas phase/ def2-tzvpp def2/j). The PBE0 functional uses 25 % Hartree-Fock exchange.<sup>14</sup>

<sup>b</sup> The general formulation of a sigma natural bond orbital (NBO) is  $\sigma_{AB} = c_A h_A + c_B h_B$ , where  $h_A$  and  $h_B$  are the atom-centered hybrid orbitals of atoms A and B, and  $c_A$  and  $c_B$  are the normalized polarization coefficients of atoms A and B. If the natural ionicity of an NBO, given by  $i_{AB} = \frac{(c_A^2 - c_B^2)}{(c_A^2 + c_B^2)}$ , exceeds a fixed limit ( $|i_{AB}| > 0.95$ ), this extremely polarized “bond” is identified instead as a lone pair.<sup>20</sup>

<sup>c</sup> Orbital occupancy ( $0 \leq x \leq 2$ ) is the number of electrons in the specified NBO. Lower orbital occupancy values are indicative of stronger delocalization.<sup>20</sup>

<sup>d</sup> Hybridization of a given NBO is of the form  $sp^\lambda$ , where  $\lambda = \left(\frac{\%p}{\%s}\right)$ .<sup>20</sup> Hybridizations with a very high value of  $\lambda$  (for example,  $sp^\infty$ ) have been denoted as non-applicable.

<sup>e</sup> Atomic orbital contributions denote the percent contribution of s, p, d, and f orbitals from atom A, and the percent contribution of s, p, d, and f orbitals from atom B, to their shared NBO  $\sigma_{AB}$  or  $\pi_{AB}$ .<sup>20</sup> Contributions from d and f orbitals are negligible and are omitted for simplicity. The percent contributions from each atom A ( $c_A^2 \times 100\%$ ) and B ( $c_B^2 \times 100\%$ ) to their shared NBO are also shown.

**Table S55.** NBO analysis<sup>a</sup> of (<sup>t</sup>BuL1)ZnCl<sub>2</sub> with the M06 functional.

| NBO <sup>b</sup>  | Occupancy <sup>c</sup> | Hybridization <sup>d</sup>               | Atomic Orbital Contributions (%) <sup>e</sup>                                |
|-------------------|------------------------|------------------------------------------|------------------------------------------------------------------------------|
| Lone pair 1 (N1)  | 1.83458                | $sp^{2.54}$                              | $s(28.24\%)p(71.65\%)$                                                       |
| $\sigma(N1-C5)$   | 1.98124                | $sp^{1.75}$ at N1<br>$sp^{1.85}$ at C5   | N1 (59.03%): $s(36.21\%)p(63.48\%)$<br>C5 (40.97%): $s(35.12\%)p(64.80\%)$   |
| $\pi(N1-C5)$      | 1.87742                | n/a                                      | N1 (74.98%): $s(0.22\%)p(99.63\%)$<br>C5 (25.02%): $s(0.29\%)p(99.49\%)$     |
| $\sigma(N1-C11)$  | 1.98036                | $sp^{1.83}$ at N1<br>$sp^{2.20}$ at C11  | N1 (59.00%): $s(35.22\%)p(64.51\%)$<br>C11 (41.00%): $s(31.22\%)p(68.70\%)$  |
| Lone pair 1 (N2)  | 1.70357                | n/a                                      | $s(0.00\%)p(99.94\%)$                                                        |
| $\sigma(N2-C5)$   | 1.98088                | $sp^{1.81}$ at N2<br>$sp^{2.08}$ at C5   | N2 (61.49%): $s(35.50\%)p(64.36\%)$<br>C5 (38.51%): $s(32.45\%)p(67.45\%)$   |
| $\sigma(N2-C6a)$  | 1.98342                | $sp^{2.10}$ at N2<br>$sp^{2.88}$ at C6a  | N2 (62.40%): $s(32.22\%)p(67.68\%)$<br>C6a (37.60%): $s(25.77\%)p(74.16\%)$  |
| $\sigma(N2-C6b)$  | 1.98496                | $sp^{2.11}$ at N2<br>$sp^{2.75}$ at C6b  | N2 (61.74%): $s(32.14\%)p(67.76\%)$<br>C6b (38.26%): $s(26.63\%)p(73.30\%)$  |
| Lone pair 1 (N3)  | 1.67463                | n/a                                      | $s(2.68\%)p(97.24\%)$                                                        |
| $\sigma(N3-C5)$   | 1.97951                | $sp^{1.82}$ at N3<br>$sp^{2.12}$ at C5   | N3 (61.25%): $s(35.44\%)p(64.40\%)$<br>C5 (38.75%): $s(32.07\%)p(67.84\%)$   |
| $\sigma(N3-C7a)$  | 1.98112                | $sp^{2.27}$ at N3<br>$sp^{2.87}$ at C7a  | N3 (62.20%): $s(30.58\%)p(69.31\%)$<br>C7a (37.80%): $s(25.83\%)p(74.10\%)$  |
| $\sigma(N3-C7b)$  | 1.98539                | $sp^{2.21}$ at N3<br>$sp^{2.91}$ at C7b  | N3 (62.46%): $s(31.15\%)p(68.74\%)$<br>C7b (37.54%): $s(25.57\%)p(74.35\%)$  |
| $\sigma(C11-C12)$ | 1.97640                | $sp^{1.71}$ at C11<br>$sp^{1.82}$ at C12 | C11 (50.87%): $s(36.85\%)p(63.05\%)$<br>C12 (49.13%): $s(35.40\%)p(64.43\%)$ |
| $\pi(C11-C12)$    | 1.67744                | n/a                                      | C11 (46.28%): $s(0.03\%)p(99.89\%)$<br>C12 (53.72%): $s(0.02\%)p(99.89\%)$   |
| $\sigma(C11-C10)$ | 1.97166                | $sp^{1.93}$ at C10<br>$sp^{2.14}$ at C11 | C10 (50.77%): $s(34.04\%)p(65.85\%)$<br>C11 (49.23%): $s(31.84\%)p(68.04\%)$ |
| Lone pair 1 (N4)  | 1.87149                | $sp^{2.65}$                              | $s(27.41\%)p(72.56\%)$                                                       |
| $\sigma(N4-C9)$   | 1.98851                | $sp^{1.59}$ at N4<br>$sp^{1.90}$ at C9   | N4 (59.86%): $s(38.42\%)p(61.26\%)$<br>C9 (40.14%): $s(34.42\%)p(65.48\%)$   |
| $\pi(N4-C9)$      | 1.86011                | n/a                                      | N4 (63.85%): $s(0.00\%)p(99.80\%)$<br>C9 (36.15%): $s(0.00\%)p(99.85\%)$     |
| $\sigma(N4-C10)$  | 1.98169                | $sp^{1.93}$ at N4<br>$sp^{2.29}$ at C10  | N4 (58.97%): $s(34.05\%)p(65.67\%)$<br>C10 (41.03%): $s(30.41\%)p(69.51\%)$  |

<sup>a</sup> Calculated in gas phase at the optimized S0 geometry using M06 (gas phase/ def2-tzvpp def2/j). The M06 functional uses 27 % Hartree-Fock exchange.<sup>23</sup>

<sup>b</sup> The general formulation of a sigma natural bond orbital (NBO) is  $\sigma_{AB} = c_A h_A + c_B h_B$ , where  $h_A$  and  $h_B$  are the atom-centered hybrid orbitals of atoms A and B, and  $c_A$  and  $c_B$  are the normalized polarization coefficients of atoms A and B. If the natural ionicity of an NBO, given by  $i_{AB} = \frac{(c_A^2 - c_B^2)}{(c_A^2 + c_B^2)}$ , exceeds a fixed limit ( $|i_{AB}| > 0.95$ ), this extremely polarized “bond” is identified instead as a lone pair.<sup>20</sup>

<sup>c</sup> Orbital occupancy ( $0 \leq x \leq 2$ ) is the number of electrons in the specified NBO. Lower orbital occupancy values are indicative of stronger delocalization.<sup>20</sup>

<sup>d</sup> Hybridization of a given NBO is of the form  $sp^\lambda$ , where  $\lambda = \left(\frac{\%p}{\%s}\right)$ .<sup>20</sup> Hybridizations with a very high value of  $\lambda$  (for example,  $sp^\infty$ ) have been denoted as non-applicable.

<sup>e</sup> Atomic orbital contributions denote the percent contribution of s, p, d, and f orbitals from atom A, and the percent contribution of s, p, d, and f orbitals from atom B, to their shared NBO  $\sigma_{AB}$  or  $\pi_{AB}$ .<sup>20</sup> Contributions from d and f orbitals are negligible and are omitted for simplicity. The percent contributions from each atom A ( $c_A^2 \times 100\%$ ) and B ( $c_B^2 \times 100\%$ ) to their shared NBO are also shown.

**Table S56.** NBO analysis<sup>a</sup> of (<sup>t</sup>BuL1)ZnCl<sub>2</sub> with the M06-2X functional.

| NBO <sup>b</sup>  | Occupancy <sup>c</sup> | Hybridization <sup>d</sup>               | Atomic Orbital Contributions (%) <sup>e</sup>                                |
|-------------------|------------------------|------------------------------------------|------------------------------------------------------------------------------|
| Lone pair 1 (N1)  | 1.85191                | $sp^{2.65}$                              | $s(27.36\%)p(72.54\%)$                                                       |
| $\sigma(N1-C5)$   | 1.98164                | $sp^{1.71}$ at N1<br>$sp^{1.85}$ at C5   | N1 (58.92%): $s(36.75\%)p(62.88\%)$<br>C5 (41.08%): $s(35.05\%)p(64.85\%)$   |
| $\pi(N1-C5)$      | 1.88150                | n/a                                      | N1 (75.31%): $s(0.18\%)p(99.66\%)$<br>C5 (24.69%): $s(0.29\%)p(99.49\%)$     |
| $\sigma(N1-C11)$  | 1.98073                | $sp^{1.80}$ at N1<br>$sp^{2.20}$ at C11  | N1 (58.79%): $s(35.58\%)p(64.11\%)$<br>C11 (41.21%): $s(31.26\%)p(68.66\%)$  |
| Lone pair 1 (N2)  | 1.70539                | n/a                                      | $s(0.00\%)p(99.94\%)$                                                        |
| $\sigma(N2-C5)$   | 1.98148                | $sp^{1.82}$ at N2<br>$sp^{2.07}$ at C5   | N2 (61.51%): $s(35.44\%)p(64.38\%)$<br>C5 (38.49%): $s(32.51\%)p(67.39\%)$   |
| $\sigma(N2-C6a)$  | 1.98365                | $sp^{2.10}$ at N2<br>$sp^{2.89}$ at C6a  | N2 (62.57%): $s(32.24\%)p(67.64\%)$<br>C6a (37.43%): $s(25.71\%)p(74.21\%)$  |
| $\sigma(N2-C6b)$  | 1.98517                | $sp^{2.11}$ at N2<br>$sp^{2.76}$ at C6b  | N2 (61.87%): $s(32.15\%)p(67.73\%)$<br>C6b (38.13%): $s(26.59\%)p(73.33\%)$  |
| Lone pair 1 (N3)  | 1.67668                | n/a                                      | $s(2.63\%)p(97.29\%)$                                                        |
| $\sigma(N3-C5)$   | 1.97999                | $sp^{1.82}$ at N3<br>$sp^{2.12}$ at C5   | N3 (61.27%): $s(35.39\%)p(64.40\%)$<br>C5 (38.73%): $s(32.07\%)p(67.83\%)$   |
| $\sigma(N3-C7a)$  | 1.98148                | $sp^{2.26}$ at N3<br>$sp^{2.88}$ at C7a  | N3 (62.35%): $s(30.65\%)p(69.23\%)$<br>C7a (37.65%): $s(25.76\%)p(74.16\%)$  |
| $\sigma(N3-C7b)$  | 1.98572                | $sp^{2.21}$ at N3<br>$sp^{2.92}$ at C7b  | N3 (62.58%): $s(31.16\%)p(68.72\%)$<br>C7b (37.42%): $s(25.52\%)p(74.40\%)$  |
| $\sigma(C11-C12)$ | 1.97699                | $sp^{1.71}$ at C11<br>$sp^{1.83}$ at C12 | C11 (51.01%): $s(36.91\%)p(62.99\%)$<br>C12 (48.99%): $s(35.28\%)p(64.53\%)$ |
| $\pi(C11-C12)$    | 1.68206                | n/a                                      | C11 (46.71%): $s(0.02\%)p(99.90\%)$<br>C12 (53.29%): $s(0.02\%)p(99.90\%)$   |
| $\sigma(C11-C10)$ | 1.97225                | $sp^{1.94}$ at C10<br>$sp^{2.15}$ at C11 | C10 (50.85%): $s(34.03\%)p(65.87\%)$<br>C11 (49.15%): $s(31.75\%)p(68.13\%)$ |
| Lone pair 1 (N4)  | 1.88835                | $sp^{2.73}$                              | $s(26.83\%)p(73.14\%)$                                                       |
| $\sigma(N4-C9)$   | 1.98862                | $sp^{1.57}$ at N4<br>$sp^{1.91}$ at C9   | N4 (59.90%): $s(38.73\%)p(60.89\%)$<br>C9 (40.10%): $s(34.28\%)p(65.61\%)$   |
| $\pi(N4-C9)$      | 1.86271                | n/a                                      | N4 (63.19%): $s(0.00\%)p(99.79\%)$<br>C9 (36.81%): $s(0.00\%)p(99.85\%)$     |
| $\sigma(N4-C10)$  | 1.98218                | $sp^{1.90}$ at N4<br>$sp^{2.28}$ at C10  | N4 (58.86%): $s(34.40\%)p(65.38\%)$<br>C10 (41.14%): $s(30.42\%)p(69.50\%)$  |

<sup>a</sup> Calculated in gas phase at the optimized S0 geometry using M06-2X (gas phase/ def2-tzvpp def2/j). The M06-2X functional uses 54 % Hartree-Fock exchange.<sup>23</sup>

<sup>b</sup> The general formulation of a sigma natural bond orbital (NBO) is  $\sigma_{AB} = c_A h_A + c_B h_B$ , where  $h_A$  and  $h_B$  are the atom-centered hybrid orbitals of atoms A and B, and  $c_A$  and  $c_B$  are the normalized polarization coefficients of atoms A and B. If the natural ionicity of an NBO, given by  $i_{AB} = \frac{(c_A^2 - c_B^2)}{(c_A^2 + c_B^2)}$ , exceeds a fixed limit ( $|i_{AB}| > 0.95$ ), this extremely polarized “bond” is identified instead as a lone pair.<sup>20</sup>

<sup>c</sup> Orbital occupancy ( $0 \leq x \leq 2$ ) is the number of electrons in the specified NBO. Lower orbital occupancy values are indicative of stronger delocalization.<sup>20</sup>

<sup>d</sup> Hybridization of a given NBO is of the form  $sp^\lambda$ , where  $\lambda = \left(\frac{\%p}{\%s}\right)$ .<sup>20</sup> Hybridizations with a very high value of  $\lambda$  (for example,  $sp^\infty$ ) have been denoted as non-applicable.

<sup>e</sup> Atomic orbital contributions denote the percent contribution of s, p, d, and f orbitals from atom A, and the percent contribution of s, p, d, and f orbitals from atom B, to their shared NBO  $\sigma_{AB}$  or  $\pi_{AB}$ .<sup>20</sup> Contributions from d and f orbitals are negligible and are omitted for simplicity. The percent contributions from each atom A ( $c_A^2 \times 100\%$ ) and B ( $c_B^2 \times 100\%$ ) to their shared NBO are also shown.

**Table S57.** NBO analysis<sup>a</sup> of (<sup>t</sup>BuL1)ZnCl<sub>2</sub> with the CAM-B3LYP functional.

| NBO <sup>b</sup>  | Occupancy <sup>c</sup> | Hybridization <sup>d</sup>               | Atomic Orbital Contributions (%) <sup>e</sup>                                |
|-------------------|------------------------|------------------------------------------|------------------------------------------------------------------------------|
| Lone pair 1 (N1)  | 1.84386                | $sp^{2.68}$                              | $s(27.16\%)p(72.75\%)$                                                       |
| $\sigma(N1-C5)$   | 1.98184                | $sp^{1.71}$ at N1<br>$sp^{1.85}$ at C5   | N1 (58.85%): $s(36.81\%)p(62.80\%)$<br>C5 (41.15%): $s(35.05\%)p(64.83\%)$   |
| $\pi(N1-C5)$      | 1.88346                | n/a                                      | N1 (75.43%): $s(0.21\%)p(99.65\%)$<br>C5 (24.57%): $s(0.26\%)p(99.53\%)$     |
| $\sigma(N1-C11)$  | 1.98108                | $sp^{1.79}$ at N1<br>$sp^{2.20}$ at C11  | N1 (58.74%): $s(35.70\%)p(63.97\%)$<br>C11 (41.26%): $s(31.25\%)p(68.64\%)$  |
| Lone pair 1 (N2)  | 1.70690                | n/a                                      | $s(0.00\%)p(99.95\%)$                                                        |
| $\sigma(N2-C5)$   | 1.98159                | $sp^{1.82}$ at N2<br>$sp^{2.07}$ at C5   | N2 (61.37%): $s(35.45\%)p(64.35\%)$<br>C5 (38.63%): $s(32.51\%)p(67.37\%)$   |
| $\sigma(N2-C6a)$  | 1.98427                | $sp^{2.10}$ at N2<br>$sp^{2.88}$ at C6a  | N2 (62.31%): $s(32.21\%)p(67.65\%)$<br>C6a (37.69%): $s(25.77\%)p(74.13\%)$  |
| $\sigma(N2-C6b)$  | 1.98579                | $sp^{2.11}$ at N2<br>$sp^{2.75}$ at C6b  | N2 (61.65%): $s(32.16\%)p(67.70\%)$<br>C6b (38.35%): $s(26.63\%)p(73.27\%)$  |
| Lone pair 1 (N3)  | 1.67749                | n/a                                      | $s(2.53\%)p(97.40\%)$                                                        |
| $\sigma(N3-C5)$   | 1.98027                | $sp^{1.82}$ at N3<br>$sp^{2.11}$ at C5   | N3 (61.12%): $s(35.41\%)p(64.37\%)$<br>C5 (38.88%): $s(32.08\%)p(67.79\%)$   |
| $\sigma(N3-C7a)$  | 1.98234                | $sp^{2.25}$ at N3<br>$sp^{2.87}$ at C7a  | N3 (62.11%): $s(30.69\%)p(69.17\%)$<br>C7a (37.89%): $s(25.82\%)p(74.07\%)$  |
| $\sigma(N3-C7b)$  | 1.98622                | $sp^{2.20}$ at N3<br>$sp^{2.91}$ at C7b  | N3 (62.38%): $s(31.20\%)p(68.65\%)$<br>C7b (37.62%): $s(25.58\%)p(74.32\%)$  |
| $\sigma(C11-C12)$ | 1.97679                | $sp^{1.71}$ at C11<br>$sp^{1.82}$ at C12 | C11 (50.94%): $s(36.86\%)p(63.03\%)$<br>C12 (49.06%): $s(35.34\%)p(64.46\%)$ |
| $\pi(C11-C12)$    | 1.68288                | n/a                                      | C11 (46.46%): $s(0.02\%)p(99.89\%)$<br>C12 (53.54%): $s(0.02\%)p(99.89\%)$   |
| $\sigma(C11-C10)$ | 1.97232                | $sp^{1.93}$ at C10<br>$sp^{2.14}$ at C11 | C10 (50.85%): $s(34.03\%)p(65.84\%)$<br>C11 (49.15%): $s(31.78\%)p(68.08\%)$ |
| Lone pair 1 (N4)  | 1.88028                | $sp^{2.76}$                              | $s(26.59\%)p(73.39\%)$                                                       |
| $\sigma(N4-C9)$   | 1.98844                | $sp^{1.56}$ at N4<br>$sp^{1.91}$ at C9   | N4 (59.78%): $s(38.84\%)p(60.77\%)$<br>C9 (40.22%): $s(34.32\%)p(65.55\%)$   |
| $\pi(N4-C9)$      | 1.86436                | n/a                                      | N4 (63.42%): $s(0.00\%)p(99.81\%)$<br>C9 (36.58%): $s(0.00\%)p(99.85\%)$     |
| $\sigma(N4-C10)$  | 1.98243                | $sp^{1.89}$ at N4<br>$sp^{2.29}$ at C10  | N4 (58.79%): $s(34.43\%)p(65.23\%)$<br>C10 (41.21%): $s(30.39\%)p(69.50\%)$  |

<sup>a</sup> Calculated in gas phase at the optimized S0 geometry using CAM-B3LYP (gas phase/ def2-tzvp def2/j). The CAM-B3LYP functional is a range-separated functional, and uses 19 % Hartree-Fock exchange at short range, 33 % Hartree-Fock exchange at intermediate range, and 65 % Hartree-Fock exchange at long range.<sup>15</sup>

<sup>b</sup> The general formulation of a sigma natural bond orbital (NBO) is  $\sigma_{AB} = c_A h_A + c_B h_B$ , where  $h_A$  and  $h_B$  are the atom-centered hybrid orbitals of atoms A and B, and  $c_A$  and  $c_B$  are the normalized polarization coefficients of atoms A and B. If the natural ionicity of an NBO, given by  $i_{AB} = \frac{(c_A^2 - c_B^2)}{(c_A^2 + c_B^2)}$ , exceeds a fixed limit ( $|i_{AB}| > 0.95$ ), this extremely polarized “bond” is identified instead as a lone pair.<sup>20</sup>

<sup>c</sup> Orbital occupancy ( $0 \leq x \leq 2$ ) is the number of electrons in the specified NBO. Lower orbital occupancy values are indicative of stronger delocalization.<sup>20</sup>

<sup>d</sup> Hybridization of a given NBO is of the form  $sp^\lambda$ , where  $\lambda = (\frac{\%p}{\%s})$ .<sup>20</sup> Hybridizations with a very high value of  $\lambda$  (for example,  $sp^\infty$ ) have been denoted as non-applicable.

<sup>e</sup> Atomic orbital contributions denote the percent contribution of s, p, d, and f orbitals from atom A, and the percent contribution of s, p, d, and f orbitals from atom B, to their shared NBO  $\sigma_{AB}$  or  $\pi_{AB}$ .<sup>20</sup> Contributions from d and f orbitals are negligible and are omitted for simplicity. The percent contributions from each atom A ( $c_A^2 \times 100\%$ ) and B ( $c_B^2 \times 100\%$ ) to their shared NBO are also shown.

**Table S58.** NBO analysis<sup>a</sup> of (CF<sub>3</sub>L2)<sub>2</sub>Zn with the M06-L functional.

| NBO <sup>b</sup>  | Occupancy <sup>c</sup> | Hybridization <sup>d</sup>               | Atomic Orbital Contributions (%) <sup>e</sup>                                |
|-------------------|------------------------|------------------------------------------|------------------------------------------------------------------------------|
| Lone pair 1 (N1)  | 1.82184                | $sp^{2.60}$                              | $s(27.78\%)p(72.20\%)$                                                       |
| $\sigma(N1-C5)$   | 1.98430                | $sp^{1.86}$ at N1<br>$sp^{2.02}$ at C5   | N1 (59.34%): $s(34.85\%)p(64.92\%)$<br>C5 (40.66%): $s(33.14\%)p(66.78\%)$   |
| $\pi(N1-C5)$      | 1.81422                | n/a                                      | N1 (76.46%): $s(0.00\%)p(99.92\%)$<br>C5 (23.54%): $s(0.00\%)p(99.80\%)$     |
| $\sigma(N1-C11)$  | 1.98564                | $sp^{1.68}$ at N1<br>$sp^{2.11}$ at C11  | N1 (59.03%): $s(37.23\%)p(62.54\%)$<br>C11 (40.97%): $s(32.11\%)p(67.81\%)$  |
| Lone pair 1 (N2)  | 1.90026                | $sp^{1.92}$                              | $s(34.22\%)p(65.60\%)$                                                       |
| $\sigma(N2-C5)$   | 1.98343                | $sp^{2.20}$ at N2<br>$sp^{1.91}$ at C5   | N2 (57.68%): $s(31.09\%)p(68.48\%)$<br>C5 (42.32%): $s(34.39\%)p(65.52\%)$   |
| $\sigma(N2-C6)$   | 1.98482                | $sp^{1.88}$ at N2<br>$sp^{1.99}$ at C6   | N2 (58.81%): $s(34.56\%)p(64.98\%)$<br>C6 (41.19%): $s(33.47\%)p(66.44\%)$   |
| $\pi(N2-C6)$      | 1.75322                | n/a                                      | N2 (63.60%): $s(0.00\%)p(99.68\%)$<br>C6 (36.40%): $s(0.00\%)p(99.86\%)$     |
| Lone pair 1 (N3)  | 1.89354                | $sp^{1.94}$                              | $s(33.97\%)p(65.88\%)$                                                       |
| $\sigma(N3-C5)$   | 1.98098                | $sp^{2.33}$ at N3<br>$sp^{1.96}$ at C5   | N3 (58.01%): $s(29.93\%)p(69.67\%)$<br>C5 (41.99%): $s(32.35\%)p(67.57\%)$   |
| $\sigma(N3-C7)$   | 1.98735                | $sp^{1.77}$ at N3<br>$sp^{1.96}$ at C7   | N3 (58.91%): $s(35.95\%)p(63.60\%)$<br>C7 (41.09%): $s(33.72\%)p(66.18\%)$   |
| $\pi(N3-C7)$      | 1.78624                | n/a                                      | N3 (63.29%): $s(0.00\%)p(99.70\%)$<br>C7 (36.71%): $s(0.00\%)p(99.86\%)$     |
| $\sigma(C6-C8)$   | 1.98865                | $sp^{1.84}$ at C8<br>$sp^{1.62}$ at C6   | C8 (50.54%): $s(35.15\%)p(64.67\%)$<br>C6 (49.46%): $s(38.10\%)p(61.74\%)$   |
| $\sigma(C7-C8)$   | 1.98759                | $sp^{1.88}$ at C8<br>$sp^{1.77}$ at C7   | C8 (50.35%): $s(34.72\%)p(65.10\%)$<br>C7 (49.65%): $s(37.89\%)p(61.95\%)$   |
| $\sigma(C11-C12)$ | 1.97802                | $sp^{1.73}$ at C11<br>$sp^{1.85}$ at C12 | C11 (50.99%): $s(36.57\%)p(63.32\%)$<br>C12 (49.01%): $s(35.02\%)p(64.81\%)$ |
| $\pi(C11-C12)$    | 1.62363                | n/a                                      | C11 (47.33%): $s(0.00\%)p(99.90\%)$<br>C12 (52.67%): $s(0.00\%)p(99.91\%)$   |
| $\sigma(C11-C10)$ | 1.97256                | $sp^{2.20}$ at C11<br>$sp^{1.95}$ at C10 | C11 (49.31%): $s(31.26\%)p(68.62\%)$<br>C10 (50.69%): $s(33.81\%)p(66.07\%)$ |
| Lone pair 1 (N4)  | 1.87739                | $sp^{2.45}$                              | $s(28.96\%)p(71.00\%)$                                                       |
| $\sigma(N4-C9)$   | 1.98810                | $sp^{1.63}$ at N4<br>$sp^{1.90}$ at C9   | N4 (59.70%): $s(37.82\%)p(61.83\%)$<br>C9 (40.30%): $s(34.46\%)p(65.44\%)$   |
| $\pi(N4-C9)$      | 1.85103                | n/a                                      | N4 (62.24%): $s(0.00\%)p(99.82\%)$<br>C9 (37.76%): $s(0.00\%)p(99.86\%)$     |
| $\sigma(N4-C10)$  | 1.98075                | $sp^{2.08}$ at N4<br>$sp^{2.30}$ at C10  | N4 (59.02%): $s(32.09\%)p(66.60\%)$<br>C10 (40.98%): $s(30.30\%)p(69.62\%)$  |

<sup>a</sup> Calculated in gas phase at the optimized S0 geometry using M06-L (gas phase/ def2-tzvpp def2/j). The M06-L functional uses 0 % Hartree-Fock exchange.<sup>19</sup>

<sup>b</sup> The general formulation of a sigma natural bond orbital (NBO) is  $\sigma_{AB} = c_A h_A + c_B h_B$ , where  $h_A$  and  $h_B$  are the atom-centered hybrid orbitals of atoms A and B, and  $c_A$  and  $c_B$  are the normalized polarization coefficients of atoms A and B. If the natural ionicity of an NBO, given by  $i_{AB} = \frac{(c_A^2 - c_B^2)}{(c_A^2 + c_B^2)}$ , exceeds a fixed limit ( $|i_{AB}| > 0.95$ ), this extremely polarized “bond” is identified instead as a lone pair.<sup>20</sup>

<sup>c</sup> Orbital occupancy ( $0 \leq x \leq 2$ ) is the number of electrons in the specified NBO. Lower orbital occupancy values are indicative of stronger delocalization.<sup>20</sup>

<sup>d</sup> Hybridization of a given NBO is of the form  $sp^\lambda$ , where  $\lambda = \left(\frac{\%p}{\%s}\right)$ .<sup>20</sup> Hybridizations with a very high value of  $\lambda$  (for example,  $sp^\infty$ ) have been denoted as non-applicable.

<sup>e</sup> Atomic orbital contributions denote the percent contribution of s, p, d, and f orbitals from atom A, and the percent contribution of s, p, d, and f orbitals from atom B, to their shared NBO  $\sigma_{AB}$  or  $\pi_{AB}$ .<sup>20</sup> Contributions from d and f orbitals are negligible and are omitted for simplicity. The percent contributions from each atom A ( $c_A^2 \times 100\%$ ) and B ( $c_B^2 \times 100\%$ ) to their shared NBO are also shown.

**Table S59.** NBO analysis<sup>a</sup> of (CF<sub>3</sub>L2)<sub>2</sub>Zn with the TPSSh functional.

| NBO <sup>b</sup>  | Occupancy <sup>c</sup> | Hybridization <sup>d</sup>               | Atomic Orbital Contributions (%) <sup>e</sup>                                |
|-------------------|------------------------|------------------------------------------|------------------------------------------------------------------------------|
| Lone pair 1 (N1)  | 1.82187                | $sp^{2.81}$                              | $s(26.21\%)p(73.77\%)$                                                       |
| $\sigma(N1-C5)$   | 1.98465                | $sp^{1.80}$ at N1<br>$sp^{2.02}$ at C5   | N1 (59.12%): $s(35.63\%)p(64.12\%)$<br>C5 (40.88%): $s(33.04\%)p(66.86\%)$   |
| $\pi(N1-C5)$      | 1.81683                | n/a                                      | N1 (76.56%): $s(0.00\%)p(99.93\%)$<br>C5 (23.44%): $s(0.00\%)p(99.80\%)$     |
| $\sigma(N1-C11)$  | 1.98547                | $sp^{1.62}$ at N1<br>$sp^{2.10}$ at C11  | N1 (58.78%): $s(38.02\%)p(61.74\%)$<br>C11 (41.22%): $s(32.19\%)p(67.70\%)$  |
| Lone pair 1 (N2)  | 1.90289                | $sp^{2.04}$                              | $s(32.82\%)p(67.02\%)$                                                       |
| $\sigma(N2-C5)$   | 1.98447                | $sp^{2.13}$ at N2<br>$sp^{1.90}$ at C5   | N2 (57.46%): $s(31.79\%)p(67.75\%)$<br>C5 (42.54%): $s(34.47\%)p(65.42\%)$   |
| $\sigma(N2-C6)$   | 1.98568                | $sp^{1.82}$ at N2<br>$sp^{2.00}$ at C6   | N2 (58.76%): $s(35.26\%)p(64.25\%)$<br>C6 (41.24%): $s(33.34\%)p(66.53\%)$   |
| $\pi(N2-C6)$      | 1.75111                | n/a                                      | N2 (63.61%): $s(0.00\%)p(99.68\%)$<br>C6 (36.39%): $s(0.00\%)p(99.86\%)$     |
| Lone pair 1 (N3)  | 1.89464                | $sp^{2.06}$                              | $s(32.68\%)p(67.18\%)$                                                       |
| $\sigma(N3-C5)$   | 1.98220                | $sp^{2.26}$ at N3<br>$sp^{2.09}$ at C5   | N3 (57.77%): $s(30.55\%)p(69.02\%)$<br>C5 (42.23%): $s(32.36\%)p(67.55\%)$   |
| $\sigma(N3-C7)$   | 1.98791                | $sp^{1.72}$ at N3<br>$sp^{1.97}$ at C7   | N3 (58.86%): $s(36.61\%)p(62.92\%)$<br>C7 (41.14%): $s(33.58\%)p(66.29\%)$   |
| $\pi(N3-C7)$      | 1.78412                | n/a                                      | N3 (63.19%): $s(0.00\%)p(99.71\%)$<br>C7 (36.81%): $s(0.00\%)p(99.85\%)$     |
| $\sigma(C6-C8)$   | 1.98857                | $sp^{1.85}$ at C8<br>$sp^{1.63}$ at C6   | C8 (50.54%): $s(35.01\%)p(64.79\%)$<br>C6 (49.46%): $s(37.99\%)p(61.84\%)$   |
| $\sigma(C7-C8)$   | 1.98757                | $sp^{1.89}$ at C8<br>$sp^{1.64}$ at C7   | C8 (50.37%): $s(34.58\%)p(65.23\%)$<br>C7 (49.63%): $s(37.78\%)p(62.05\%)$   |
| $\sigma(C11-C12)$ | 1.97723                | $sp^{1.73}$ at C11<br>$sp^{1.86}$ at C12 | C11 (51.16%): $s(36.63\%)p(63.26\%)$<br>C12 (48.84%): $s(34.87\%)p(64.95\%)$ |
| $\pi(C11-C12)$    | 1.62402                | n/a                                      | C11 (47.85%): $s(0.00\%)p(99.91\%)$<br>C12 (52.15%): $s(0.00\%)p(99.90\%)$   |
| $\sigma(C11-C10)$ | 1.97253                | $sp^{2.21}$ at C11<br>$sp^{1.96}$ at C10 | C11 (49.28%): $s(31.11\%)p(68.78\%)$<br>C10 (50.72%): $s(33.73\%)p(66.15\%)$ |
| Lone pair 1 (N4)  | 1.87776                | $sp^{2.59}$                              | $s(27.81\%)p(72.16\%)$                                                       |
| $\sigma(N4-C9)$   | 1.98807                | $sp^{1.60}$ at N4<br>$sp^{1.90}$ at C9   | N4 (59.60%): $s(38.36\%)p(61.27\%)$<br>C9 (40.40%): $s(34.43\%)p(65.45\%)$   |
| $\pi(N4-C9)$      | 1.85065                | n/a                                      | N4 (62.24%): $s(0.00\%)p(99.83\%)$<br>C9 (37.56%): $s(0.00\%)p(99.87\%)$     |
| $\sigma(N4-C10)$  | 1.98158                | $sp^{1.96}$ at N4<br>$sp^{2.29}$ at C10  | N4 (58.78%): $s(33.69\%)p(65.97\%)$<br>C10 (41.22%): $s(30.39\%)p(69.51\%)$  |

<sup>a</sup> Calculated in gas phase at the optimized S0 geometry using TPSSh (gas phase/ def2-tzvp def2/j). The TPSSh functional uses 10 % Hartree-Fock exchange.<sup>11</sup>

<sup>b</sup> The general formulation of a sigma natural bond orbital (NBO) is  $\sigma_{AB} = c_A h_A + c_B h_B$ , where  $h_A$  and  $h_B$  are the atom-centered hybrid orbitals of atoms A and B, and  $c_A$  and  $c_B$  are the normalized polarization coefficients of atoms A and B. If the natural ionicity of an NBO, given by  $i_{AB} = \frac{(c_A^2 - c_B^2)}{(c_A^2 + c_B^2)}$ , exceeds a fixed limit ( $|i_{AB}| > 0.95$ ), this extremely polarized “bond” is identified instead as a lone pair.<sup>20</sup>

<sup>c</sup> Orbital occupancy ( $0 \leq x \leq 2$ ) is the number of electrons in the specified NBO. Lower orbital occupancy values are indicative of stronger delocalization.<sup>20</sup>

<sup>d</sup> Hybridization of a given NBO is of the form  $sp^\lambda$ , where  $\lambda = \left(\frac{\%p}{\%s}\right)$ .<sup>20</sup> Hybridizations with a very high value of  $\lambda$  (for example,  $sp^\infty$ ) have been denoted as non-applicable.

<sup>e</sup> Atomic orbital contributions denote the percent contribution of s, p, d, and f orbitals from atom A, and the percent contribution of s, p, d, and f orbitals from atom B, to their shared NBO  $\sigma_{AB}$  or  $\pi_{AB}$ .<sup>20</sup> Contributions from d and f orbitals are negligible and are omitted for simplicity. The percent contributions from each atom A ( $c_A^2 \times 100\%$ ) and B ( $c_B^2 \times 100\%$ ) to their shared NBO are also shown.

**Table S60.** NBO analysis<sup>a</sup> of (CF<sub>3</sub>L2)<sub>2</sub>Zn with the O3LYP functional.

| NBO <sup>b</sup>  | Occupancy <sup>c</sup> | Hybridization <sup>d</sup>               | Atomic Orbital Contributions (%) <sup>e</sup>                                |
|-------------------|------------------------|------------------------------------------|------------------------------------------------------------------------------|
| Lone pair 1 (N1)  | 1.82080                | $sp^{2.86}$                              | $s(25.88\%)p(74.10\%)$                                                       |
| $\sigma(N1-C5)$   | 1.98451                | $sp^{1.79}$ at N1<br>$sp^{2.03}$ at C5   | N1 (59.01%): $s(35.79\%)p(63.96\%)$<br>C5 (40.99%): $s(32.98\%)p(66.92\%)$   |
| $\pi(N1-C5)$      | 1.81607                | n/a                                      | N1 (76.42%): $s(0.00\%)p(99.93\%)$<br>C11 (23.58%): $s(0.00\%)p(99.80\%)$    |
| $\sigma(N1-C11)$  | 1.98525                | $sp^{1.61}$ at N1<br>$sp^{2.10}$ at C11  | N1 (58.66%): $s(38.18\%)p(61.58\%)$<br>C11 (41.34%): $s(32.24\%)p(67.66\%)$  |
| Lone pair 1 (N2)  | 1.89989                | $sp^{2.06}$                              | $s(32.61\%)p(67.21\%)$                                                       |
| $\sigma(N2-C5)$   | 1.98442                | $sp^{2.12}$ at N2<br>$sp^{1.89}$ at C5   | N2 (57.37%): $s(31.87\%)p(67.67\%)$<br>C5 (42.63%): $s(34.55\%)p(65.35\%)$   |
| $\sigma(N2-C6)$   | 1.98558                | $sp^{1.81}$ at N2<br>$sp^{2.00}$ at C6   | N2 (58.65%): $s(35.39\%)p(64.13\%)$<br>C6 (41.35%): $s(33.34\%)p(66.54\%)$   |
| $\pi(N2-C6)$      | 1.75211                | n/a                                      | N2 (63.48%): $s(0.00\%)p(99.67\%)$<br>C6 (36.52%): $s(0.00\%)p(99.87\%)$     |
| Lone pair 1 (N3)  | 1.89241                | $sp^{2.07}$                              | $s(32.50\%)p(67.35\%)$                                                       |
| $\sigma(N3-C5)$   | 1.98208                | $sp^{2.25}$ at N3<br>$sp^{2.09}$ at C5   | N3 (57.65%): $s(30.62\%)p(68.96\%)$<br>C5 (42.35%): $s(32.34\%)p(67.57\%)$   |
| $\sigma(N3-C7)$   | 1.98775                | $sp^{1.71}$ at N3<br>$sp^{1.98}$ at C7   | N3 (58.74%): $s(36.72\%)p(62.81\%)$<br>C7 (41.26%): $s(33.57\%)p(66.31\%)$   |
| $\pi(N3-C7)$      | 1.78465                | n/a                                      | N3 (63.05%): $s(0.00\%)p(99.70\%)$<br>C7 (36.95%): $s(0.00\%)p(99.86\%)$     |
| $\sigma(C6-C8)$   | 1.98799                | $sp^{1.85}$ at C8<br>$sp^{1.63}$ at C6   | C8 (50.55%): $s(34.98\%)p(64.84\%)$<br>C6 (49.45%): $s(37.98\%)p(61.86\%)$   |
| $\sigma(C7-C8)$   | 1.98701                | $sp^{1.89}$ at C8<br>$sp^{1.64}$ at C7   | C8 (50.39%): $s(34.56\%)p(65.26\%)$<br>C7 (49.61%): $s(37.77\%)p(62.08\%)$   |
| $\sigma(C11-C12)$ | 1.97670                | $sp^{1.73}$ at C11<br>$sp^{1.87}$ at C12 | C11 (51.14%): $s(36.64\%)p(63.25\%)$<br>C12 (48.86%): $s(34.82\%)p(65.01\%)$ |
| $\pi(C11-C12)$    | 1.62356                | n/a                                      | C11 (47.89%): $s(0.00\%)p(99.92\%)$<br>C12 (52.11%): $s(0.00\%)p(99.91\%)$   |
| $\sigma(C11-C10)$ | 1.97207                | $sp^{2.22}$ at C11<br>$sp^{1.96}$ at C10 | C11 (49.32%): $s(31.05\%)p(68.85\%)$<br>C10 (50.68%): $s(33.69\%)p(66.20\%)$ |
| Lone pair 1 (N4)  | 1.87570                | $sp^{2.61}$                              | $s(27.68\%)p(72.29\%)$                                                       |
| $\sigma(N4-C9)$   | 1.98786                | $sp^{1.59}$ at N4<br>$sp^{1.90}$ at C9   | N4 (59.49%): $s(38.47\%)p(61.17\%)$<br>C9 (40.51%): $s(34.42\%)p(65.46\%)$   |
| $\pi(N4-C9)$      | 1.85161                | n/a                                      | N4 (62.41%): $s(0.00\%)p(99.82\%)$<br>C9 (37.59%): $s(0.00\%)p(99.87\%)$     |
| $\sigma(N4-C10)$  | 1.98136                | $sp^{1.96}$ at N4<br>$sp^{2.28}$ at C10  | N4 (58.62%): $s(33.72\%)p(65.96\%)$<br>C10 (41.38%): $s(30.46\%)p(69.45\%)$  |

<sup>a</sup> Calculated in gas phase at the optimized S0 geometry using O3LYP (gas phase/ def2-tzvpp def2/j). The O3LYP functional uses 11.61 % Hartree-Fock exchange.<sup>21</sup>

<sup>b</sup> The general formulation of a sigma natural bond orbital (NBO) is  $\sigma_{AB} = c_A h_A + c_B h_B$ , where  $h_A$  and  $h_B$  are the atom-centered hybrid orbitals of atoms A and B, and  $c_A$  and  $c_B$  are the normalized polarization coefficients of atoms A and B. If the natural ionicity of an NBO, given by  $i_{AB} = \frac{(c_A^2 - c_B^2)}{(c_A^2 + c_B^2)}$ , exceeds a fixed limit ( $|i_{AB}| > 0.95$ ), this extremely polarized “bond” is identified instead as a lone pair.<sup>20</sup>

<sup>c</sup> Orbital occupancy ( $0 \leq x \leq 2$ ) is the number of electrons in the specified NBO. Lower orbital occupancy values are indicative of stronger delocalization.<sup>20</sup>

<sup>d</sup> Hybridization of a given NBO is of the form  $sp^\lambda$ , where  $\lambda = \left(\frac{\%p}{\%s}\right)$ .<sup>20</sup> Hybridizations with a very high value of  $\lambda$  (for example,  $sp^\infty$ ) have been denoted as non-applicable.

<sup>e</sup> Atomic orbital contributions denote the percent contribution of s, p, d, and f orbitals from atom A, and the percent contribution of s, p, d, and f orbitals from atom B, to their shared NBO  $\sigma_{AB}$  or  $\pi_{AB}$ .<sup>20</sup> Contributions from d and f orbitals are negligible and are omitted for simplicity. The percent contributions from each atom A ( $c_A^2 \times 100\%$ ) and B ( $c_B^2 \times 100\%$ ) to their shared NBO are also shown.

**Table S61.** NBO analysis<sup>a</sup> of (CF<sub>3</sub>L2)<sub>2</sub>Zn with the B3LYP functional.

| NBO <sup>b</sup>  | Occupancy <sup>c</sup> | Hybridization <sup>d</sup>               | Atomic Orbital Contributions (%) <sup>e</sup>                                |
|-------------------|------------------------|------------------------------------------|------------------------------------------------------------------------------|
| Lone pair 1 (N1)  | 1.82542                | $sp^{2.90}$                              | $s(25.67\%)p(74.32\%)$                                                       |
| $\sigma(N1-C5)$   | 1.98458                | $sp^{1.78}$ at N1<br>$sp^{2.03}$ at C5   | N1 (59.07%): $s(35.89\%)p(63.85\%)$<br>C5 (40.93%): $s(32.99\%)p(66.90\%)$   |
| $\pi(N1-C5)$      | 1.82035                | n/a                                      | N1 (77.22%): $s(0.00\%)p(99.93\%)$<br>C11 (22.78%): $s(0.00\%)p(99.81\%)$    |
| $\sigma(N1-C11)$  | 1.98533                | $sp^{1.60}$ at N1<br>$sp^{2.10}$ at C11  | N1 (58.75%): $s(38.31\%)p(61.44\%)$<br>C11 (41.25%): $s(32.25\%)p(67.64\%)$  |
| Lone pair 1 (N2)  | 1.90434                | $sp^{2.13}$                              | $s(31.91\%)p(67.91\%)$                                                       |
| $\sigma(N2-C5)$   | 1.98457                | $sp^{2.09}$ at N2<br>$sp^{1.89}$ at C5   | N2 (57.52%): $s(32.19\%)p(67.33\%)$<br>C5 (42.48%): $s(34.52\%)p(65.37\%)$   |
| $\sigma(N2-C6)$   | 1.98609                | $sp^{1.78}$ at N2<br>$sp^{1.99}$ at C6   | N2 (58.78%): $s(35.77\%)p(63.73\%)$<br>C6 (41.22%): $s(33.39\%)p(66.48\%)$   |
| $\pi(N2-C6)$      | 1.75163                | n/a                                      | N2 (63.98%): $s(0.00\%)p(99.68\%)$<br>C6 (36.02%): $s(0.00\%)p(99.87\%)$     |
| Lone pair 1 (N3)  | 1.89692                | $sp^{2.13}$                              | $s(31.87\%)p(67.99\%)$                                                       |
| $\sigma(N3-C5)$   | 1.98240                | $sp^{2.22}$ at N3<br>$sp^{2.09}$ at C5   | N3 (57.81%): $s(30.93\%)p(68.62\%)$<br>C5 (42.19%): $s(32.35\%)p(67.55\%)$   |
| $\sigma(N3-C7)$   | 1.98801                | $sp^{1.69}$ at N3<br>$sp^{1.97}$ at C7   | N3 (58.85%): $s(37.05\%)p(62.47\%)$<br>C7 (41.15%): $s(33.62\%)p(66.24\%)$   |
| $\pi(N3-C7)$      | 1.78543                | n/a                                      | N3 (63.50%): $s(0.00\%)p(99.71\%)$<br>C7 (36.50%): $s(0.00\%)p(99.86\%)$     |
| $\sigma(C6-C8)$   | 1.98798                | $sp^{1.85}$ at C8<br>$sp^{1.62}$ at C6   | C8 (50.51%): $s(35.01\%)p(64.78\%)$<br>C6 (49.49%): $s(38.05\%)p(61.78\%)$   |
| $\sigma(C7-C8)$   | 1.98709                | $sp^{1.88}$ at C8<br>$sp^{1.64}$ at C7   | C8 (50.35%): $s(34.59\%)p(65.20\%)$<br>C7 (49.65%): $s(37.83\%)p(62.00\%)$   |
| $\sigma(C11-C12)$ | 1.97702                | $sp^{1.73}$ at C11<br>$sp^{1.86}$ at C12 | C11 (51.13%): $s(36.61\%)p(63.28\%)$<br>C12 (48.87%): $s(34.89\%)p(64.92\%)$ |
| $\pi(C11-C12)$    | 1.62598                | n/a                                      | C11 (47.44%): $s(0.00\%)p(99.92\%)$<br>C12 (52.56%): $s(0.00\%)p(99.91\%)$   |
| $\sigma(C11-C10)$ | 1.97261                | $sp^{2.22}$ at C11<br>$sp^{1.96}$ at C10 | C11 (49.29%): $s(31.06\%)p(68.82\%)$<br>C10 (50.71%): $s(33.70\%)p(66.17\%)$ |
| Lone pair 1 (N4)  | 1.88070                | $sp^{2.67}$                              | $s(27.21\%)p(72.76\%)$                                                       |
| $\sigma(N4-C9)$   | 1.98779                | $sp^{1.58}$ at N4<br>$sp^{1.90}$ at C9   | N4 (59.58%): $s(38.68\%)p(60.94\%)$<br>C9 (40.42%): $s(34.47\%)p(65.40\%)$   |
| $\pi(N4-C9)$      | 1.85387                | n/a                                      | N4 (62.49%): $s(0.00\%)p(99.83\%)$<br>C9 (37.51%): $s(0.00\%)p(99.88\%)$     |
| $\sigma(N4-C10)$  | 1.98159                | $sp^{1.93}$ at N4<br>$sp^{2.28}$ at C10  | N4 (58.79%): $s(33.98\%)p(65.67\%)$<br>C10 (41.21%): $s(30.45\%)p(69.45\%)$  |

<sup>a</sup> Calculated in gas phase at the optimized S0 geometry using B3LYP (gas phase/ def2-tzvpp def2/j). The B3LYP functional uses 20 % Hartree-Fock exchange.<sup>22</sup>

<sup>b</sup> The general formulation of a sigma natural bond orbital (NBO) is  $\sigma_{AB} = c_A h_A + c_B h_B$ , where  $h_A$  and  $h_B$  are the atom-centered hybrid orbitals of atoms A and B, and  $c_A$  and  $c_B$  are the normalized polarization coefficients of atoms A and B. If the natural ionicity of an NBO, given by  $i_{AB} = \frac{(c_A^2 - c_B^2)}{(c_A^2 + c_B^2)}$ , exceeds a fixed limit ( $|i_{AB}| > 0.95$ ), this extremely polarized “bond” is identified instead as a lone pair.<sup>20</sup>

<sup>c</sup> Orbital occupancy ( $0 \leq x \leq 2$ ) is the number of electrons in the specified NBO. Lower orbital occupancy values are indicative of stronger delocalization.<sup>20</sup>

<sup>d</sup> Hybridization of a given NBO is of the form  $sp^\lambda$ , where  $\lambda = \left(\frac{\%p}{\%s}\right)$ .<sup>20</sup> Hybridizations with a very high value of  $\lambda$  (for example,  $sp^\infty$ ) have been denoted as non-applicable.

<sup>e</sup> Atomic orbital contributions denote the percent contribution of s, p, d, and f orbitals from atom A, and the percent contribution of s, p, d, and f orbitals from atom B, to their shared NBO  $\sigma_{AB}$  or  $\pi_{AB}$ .<sup>20</sup> Contributions from d and f orbitals are negligible and are omitted for simplicity. The percent contributions from each atom A ( $c_A^2 \times 100\%$ ) and B ( $c_B^2 \times 100\%$ ) to their shared NBO are also shown.

**Table S62.** NBO analysis<sup>a</sup> of (CF<sub>3</sub>L2)<sub>2</sub>Zn with the PBE0 functional.

| NBO <sup>b</sup>  | Occupancy <sup>c</sup> | Hybridization <sup>d</sup>               | Atomic Orbital Contributions (%) <sup>e</sup>                                |
|-------------------|------------------------|------------------------------------------|------------------------------------------------------------------------------|
| Lone pair 1 (N1)  | 1.82844                | $sp^{2.90}$                              | $s(25.62\%)p(74.37\%)$                                                       |
| $\sigma(N1-C5)$   | 1.98484                | $sp^{1.78}$ at N1<br>$sp^{2.03}$ at C5   | N1 (59.08%): $s(35.93\%)p(63.80\%)$<br>C5 (40.92%): $s(33.00\%)p(66.90\%)$   |
| $\pi(N1-C5)$      | 1.82213                | n/a                                      | N1 (77.56%): $s(0.00\%)p(99.92\%)$<br>C11 (22.44%): $s(0.00\%)p(99.79\%)$    |
| $\sigma(N1-C11)$  | 1.98545                | $sp^{1.60}$ at N1<br>$sp^{2.10}$ at C11  | N1 (58.69%): $s(38.31\%)p(61.43\%)$<br>C11 (41.31%): $s(32.26\%)p(67.64\%)$  |
| Lone pair 1 (N2)  | 1.90459                | $sp^{2.10}$                              | $s(32.22\%)p(67.60\%)$                                                       |
| $\sigma(N2-C5)$   | 1.98479                | $sp^{2.10}$ at N2<br>$sp^{1.89}$ at C5   | N2 (57.46%): $s(32.08\%)p(67.43\%)$<br>C5 (42.54%): $s(34.52\%)p(65.38\%)$   |
| $\sigma(N2-C6)$   | 1.98610                | $sp^{1.77}$ at N2<br>$sp^{1.99}$ at C6   | N2 (58.69%): $s(35.55\%)p(63.03\%)$<br>C6 (41.31%): $s(33.36\%)p(66.51\%)$   |
| $\pi(N2-C6)$      | 1.75137                | n/a                                      | N2 (64.13%): $s(0.00\%)p(99.65\%)$<br>C6 (35.87%): $s(0.00\%)p(99.85\%)$     |
| Lone pair 1 (N3)  | 1.89734                | $sp^{2.11}$                              | $s(32.10\%)p(67.75\%)$                                                       |
| $\sigma(N3-C5)$   | 1.98259                | $sp^{2.23}$ at N3<br>$sp^{2.09}$ at C5   | N3 (57.75%): $s(30.84\%)p(68.70\%)$<br>C5 (42.25%): $s(32.35\%)p(67.56\%)$   |
| $\sigma(N3-C7)$   | 1.98812                | $sp^{1.70}$ at N3<br>$sp^{1.97}$ at C7   | N3 (58.79%): $s(36.89\%)p(62.61\%)$<br>C7 (41.21%): $s(33.60\%)p(66.27\%)$   |
| $\pi(N3-C7)$      | 1.78515                | n/a                                      | N3 (63.67%): $s(0.00\%)p(99.68\%)$<br>C7 (36.33%): $s(0.00\%)p(99.85\%)$     |
| $\sigma(C6-C8)$   | 1.98821                | $sp^{1.85}$ at C8<br>$sp^{1.63}$ at C6   | C8 (50.57%): $s(34.98\%)p(64.82\%)$<br>C6 (49.43%): $s(37.97\%)p(61.86\%)$   |
| $\sigma(C7-C8)$   | 1.98730                | $sp^{1.89}$ at C8<br>$sp^{1.64}$ at C7   | C8 (50.40%): $s(34.56\%)p(65.25\%)$<br>C7 (49.60%): $s(37.76\%)p(62.08\%)$   |
| $\sigma(C11-C12)$ | 1.97720                | $sp^{1.73}$ at C11<br>$sp^{1.86}$ at C12 | C11 (51.10%): $s(36.62\%)p(63.27\%)$<br>C12 (48.90%): $s(34.87\%)p(64.94\%)$ |
| $\pi(C11-C12)$    | 1.62749                | n/a                                      | C11 (47.39%): $s(0.00\%)p(99.91\%)$<br>C12 (52.61%): $s(0.00\%)p(99.90\%)$   |
| $\sigma(C11-C10)$ | 1.97279                | $sp^{2.22}$ at C11<br>$sp^{1.96}$ at C10 | C11 (49.27%): $s(31.05\%)p(68.83\%)$<br>C10 (50.73%): $s(33.72\%)p(66.16\%)$ |
| Lone pair 1 (N4)  | 1.88191                | $sp^{2.65}$                              | $s(27.36\%)p(72.61\%)$                                                       |
| $\sigma(N4-C9)$   | 1.98801                | $sp^{1.58}$ at N4<br>$sp^{1.90}$ at C9   | N4 (59.52%): $s(38.58\%)p(61.03\%)$<br>C9 (40.48%): $s(34.46\%)p(65.41\%)$   |
| $\pi(N4-C9)$      | 1.85470                | n/a                                      | N4 (62.64%): $s(0.00\%)p(99.81\%)$<br>C9 (37.36%): $s(0.00\%)p(99.86\%)$     |
| $\sigma(N4-C10)$  | 1.98177                | $sp^{1.94}$ at N4<br>$sp^{2.28}$ at C10  | N4 (58.69%): $s(33.92\%)p(65.72\%)$<br>C10 (41.31%): $s(30.44\%)p(69.46\%)$  |

<sup>a</sup> Calculated in gas phase at the optimized S0 geometry using PBE0 (gas phase/ def2-tzvp def2/j). The PBE0 functional uses 25 % Hartree-Fock exchange.<sup>14</sup>

<sup>b</sup> The general formulation of a sigma natural bond orbital (NBO) is  $\sigma_{AB} = c_A h_A + c_B h_B$ , where  $h_A$  and  $h_B$  are the atom-centered hybrid orbitals of atoms A and B, and  $c_A$  and  $c_B$  are the normalized polarization coefficients of atoms A and B. If the natural ionicity of an NBO, given by  $i_{AB} = \frac{(c_A^2 - c_B^2)}{(c_A^2 + c_B^2)}$ , exceeds a fixed limit ( $|i_{AB}| > 0.95$ ), this extremely polarized “bond” is identified instead as a lone pair.<sup>20</sup>

<sup>c</sup> Orbital occupancy ( $0 \leq x \leq 2$ ) is the number of electrons in the specified NBO. Lower orbital occupancy values are indicative of stronger delocalization.<sup>20</sup>

<sup>d</sup> Hybridization of a given NBO is of the form  $sp^\lambda$ , where  $\lambda = \left(\frac{\%p}{\%s}\right)$ .<sup>20</sup> Hybridizations with a very high value of  $\lambda$  (for example,  $sp^\infty$ ) have been denoted as non-applicable.

<sup>e</sup> Atomic orbital contributions denote the percent contribution of s, p, d, and f orbitals from atom A, and the percent contribution of s, p, d, and f orbitals from atom B, to their shared NBO  $\sigma_{AB}$  or  $\pi_{AB}$ .<sup>20</sup> Contributions from d and f orbitals are negligible and are omitted for simplicity. The percent contributions from each atom A ( $c_A^2 \times 100\%$ ) and B ( $c_B^2 \times 100\%$ ) to their shared NBO are also shown.

**Table S63.** NBO analysis<sup>a</sup> of (CF<sub>3</sub>L2)<sub>2</sub>Zn with the M06 functional.

| NBO <sup>b</sup>  | Occupancy <sup>c</sup> | Hybridization <sup>d</sup>               | Atomic Orbital Contributions (%) <sup>e</sup>                                |
|-------------------|------------------------|------------------------------------------|------------------------------------------------------------------------------|
| Lone pair 1 (N1)  | 1.81960                | $sp^{2.87}$                              | $s(25.83\%)p(74.15\%)$                                                       |
| Lone pair 2 (N1)  | 1.55936                | n/a                                      | $s(0.00\%)p(99.91\%)$                                                        |
| $\sigma(N1-C5)$   | 1.98445                | $sp^{1.79}$ at N1<br>$sp^{2.02}$ at C5   | N1 (59.30%): $s(35.80\%)p(63.99\%)$<br>C5 (40.70%): $s(33.06\%)p(66.86\%)$   |
| $\sigma(N1-C11)$  | 1.98535                | $sp^{1.61}$ at N1<br>$sp^{2.10}$ at C11  | N1 (58.96%): $s(38.24\%)p(61.55\%)$<br>C11 (41.04%): $s(32.22\%)p(67.69\%)$  |
| Lone pair 1 (N2)  | 1.90261                | $sp^{2.08}$                              | $s(32.35\%)p(67.43\%)$                                                       |
| $\sigma(N2-C5)$   | 1.98394                | $sp^{2.10}$ at N2<br>$sp^{1.90}$ at C5   | N2 (57.74%): $s(32.08\%)p(67.50\%)$<br>C5 (42.26%): $s(34.50\%)p(65.42\%)$   |
| $\sigma(N2-C6)$   | 1.98555                | $sp^{1.81}$ at N2<br>$sp^{1.99}$ at C6   | N2 (58.83%): $s(35.44\%)p(64.11\%)$<br>C6 (41.17%): $s(33.44\%)p(66.47\%)$   |
| $\pi(N2-C6)$      | 1.75275                | n/a                                      | N2 (64.89%): $s(0.00\%)p(99.64\%)$<br>C6 (35.11%): $s(0.00\%)p(99.85\%)$     |
| Lone pair 1 (N3)  | 1.89556                | $sp^{2.09}$                              | $s(32.29\%)p(67.52\%)$                                                       |
| $\sigma(N3-C5)$   | 1.98177                | $sp^{2.23}$ at N3<br>$sp^{2.09}$ at C5   | N3 (58.02%): $s(30.85\%)p(68.76\%)$<br>C5 (41.98%): $s(32.34\%)p(67.59\%)$   |
| $\sigma(N3-C7)$   | 1.98771                | $sp^{1.71}$ at N3<br>$sp^{1.96}$ at C7   | N3 (58.87%): $s(36.71\%)p(62.86\%)$<br>C7 (41.13%): $s(33.71\%)p(66.19\%)$   |
| $\pi(N3-C7)$      | 1.78691                | n/a                                      | N3 (64.45%): $s(0.00\%)p(99.67\%)$<br>C7 (35.55%): $s(0.00\%)p(99.84\%)$     |
| $\sigma(C6-C8)$   | 1.98778                | $sp^{1.62}$ at C6<br>$sp^{1.85}$ at C8   | C6 (49.49%): $s(38.09\%)p(61.76\%)$<br>C8 (50.51%): $s(35.05\%)p(64.77\%)$   |
| $\sigma(C7-C8)$   | 1.98679                | $sp^{1.64}$ at C7<br>$sp^{1.88}$ at C8   | C7 (49.64%): $s(37.84\%)p(62.01\%)$<br>C8 (50.36%): $s(34.64\%)p(65.19\%)$   |
| $\sigma(C11-C12)$ | 1.97678                | $sp^{1.73}$ at C11<br>$sp^{1.85}$ at C12 | C11 (51.01%): $s(36.59\%)p(63.31\%)$<br>C12 (48.99%): $s(35.00\%)p(64.84\%)$ |
| $\pi(C11-C12)$    | 1.62792                | n/a                                      | C11 (46.85%): $s(0.00\%)p(99.91\%)$<br>C12 (53.15%): $s(0.00\%)p(99.90\%)$   |
| $\sigma(C11-C10)$ | 1.97228                | $sp^{2.21}$ at C11<br>$sp^{1.96}$ at C10 | C11 (49.30%): $s(31.12\%)p(68.77\%)$<br>C10 (50.70%): $s(33.74\%)p(66.14\%)$ |
| Lone pair 1 (N4)  | 1.87927                | $sp^{2.66}$                              | $s(27.32\%)p(72.63\%)$                                                       |
| $\sigma(N4-C9)$   | 1.98779                | $sp^{1.59}$ at N4<br>$sp^{1.89}$ at C9   | N4 (59.65%): $s(38.55\%)p(61.12\%)$<br>C9 (40.35%): $s(34.55\%)p(65.36\%)$   |
| $\pi(N4-C9)$      | 1.85836                | n/a                                      | N4 (63.10%): $s(0.00\%)p(99.80\%)$<br>C9 (39.90%): $s(0.00\%)p(99.85\%)$     |
| $\sigma(N4-C10)$  | 1.98120                | $sp^{1.93}$ at N4<br>$sp^{2.29}$ at C10  | N4 (59.01%): $s(34.01\%)p(65.69\%)$<br>C10 (40.99%): $s(30.38\%)p(69.54\%)$  |

<sup>a</sup> Calculated in gas phase at the optimized S0 geometry using M06 (gas phase/ def2-tzvpp def2/j). The M06 functional uses 27 % Hartree-Fock exchange.<sup>23</sup>

<sup>b</sup> The general formulation of a sigma natural bond orbital (NBO) is  $\sigma_{AB} = c_A h_A + c_B h_B$ , where  $h_A$  and  $h_B$  are the atom-centered hybrid orbitals of atoms A and B, and  $c_A$  and  $c_B$  are the normalized polarization coefficients of atoms A and B. If the natural ionicity of an NBO, given by  $i_{AB} = \frac{(c_A^2 - c_B^2)}{(c_A^2 + c_B^2)}$ , exceeds a fixed limit ( $|i_{AB}| > 0.95$ ), this extremely polarized “bond” is identified instead as a lone pair.<sup>20</sup>

<sup>c</sup> Orbital occupancy ( $0 \leq x \leq 2$ ) is the number of electrons in the specified NBO. Lower orbital occupancy values are indicative of stronger delocalization.<sup>20</sup>

<sup>d</sup> Hybridization of a given NBO is of the form  $sp^\lambda$ , where  $\lambda = (\frac{\%p}{\%s})$ .<sup>20</sup> Hybridizations with a very high value of  $\lambda$  (for example,  $sp^\infty$ ) have been denoted as non-applicable.

<sup>e</sup> Atomic orbital contributions denote the percent contribution of s, p, d, and f orbitals from atom A, and the percent contribution of s, p, d, and f orbitals from atom B, to their shared NBO  $\sigma_{AB}$  or  $\pi_{AB}$ .<sup>20</sup> Contributions from d and f orbitals are negligible and are omitted for simplicity. The percent contributions from each atom A ( $c_A^2 \times 100\%$ ) and B ( $c_B^2 \times 100\%$ ) to their shared NBO are also shown.

**Table S64.** NBO analysis<sup>a</sup> of (CF<sub>3</sub>L2)<sub>2</sub>Zn with the M06-2X functional.

| NBO <sup>b</sup>  | Occupancy <sup>c</sup> | Hybridization <sup>d</sup>               | Atomic Orbital Contributions (%) <sup>e</sup>                                |
|-------------------|------------------------|------------------------------------------|------------------------------------------------------------------------------|
| Lone pair 1 (N1)  | 1.84913                | $sp^{2.97}$                              | $s(25.20\%)p(74.78\%)$                                                       |
| Lone pair 2 (N1)  | 1.56422                | n/a                                      | $s(0.00\%)p(99.91\%)$                                                        |
| $\sigma(N1-C5)$   | 1.98480                | $sp^{1.76}$ at N1<br>$sp^{2.03}$ at C5   | N1 (59.09%): $s(36.19\%)p(63.56\%)$<br>C5 (40.91%): $s(32.96\%)p(66.95\%)$   |
| $\sigma(N1-C11)$  | 1.98507                | $sp^{1.59}$ at N1<br>$sp^{2.10}$ at C11  | N1 (58.71%): $s(38.49\%)p(61.26\%)$<br>C11 (41.29%): $s(32.27\%)p(67.64\%)$  |
| Lone pair 1 (N2)  | 1.90970                | $sp^{2.16}$                              | $s(31.59\%)p(68.22\%)$                                                       |
| $\sigma(N2-C5)$   | 1.98502                | $sp^{2.07}$ at N2<br>$sp^{1.89}$ at C5   | N2 (57.59%): $s(32.39\%)p(67.13\%)$<br>C5 (42.41%): $s(34.58\%)p(65.34\%)$   |
| $\sigma(N2-C6)$   | 1.98641                | $sp^{1.77}$ at N2<br>$sp^{1.99}$ at C6   | N2 (58.86%): $s(35.89\%)p(63.61\%)$<br>C6 (41.14%): $s(33.36\%)p(66.52\%)$   |
| $\pi(N2-C6)$      | 1.74943                | n/a                                      | N2 (64.38%): $s(0.00\%)p(99.62\%)$<br>C6 (35.62%): $s(0.00\%)p(99.85\%)$     |
| Lone pair 1 (N3)  | 1.90350                | $sp^{2.18}$                              | $s(31.38\%)p(68.46\%)$                                                       |
| $\sigma(N3-C5)$   | 1.98290                | $sp^{2.19}$ at N3<br>$sp^{2.09}$ at C5   | N3 (57.93%): $s(31.22\%)p(68.34\%)$<br>C5 (42.07%): $s(32.35\%)p(67.57\%)$   |
| $\sigma(N3-C7)$   | 1.98826                | $sp^{1.67}$ at N3<br>$sp^{1.97}$ at C7   | N3 (58.94%): $s(37.25\%)p(62.26\%)$<br>C7 (41.06%): $s(33.59\%)p(66.29\%)$   |
| $\pi(N3-C7)$      | 1.78600                | n/a                                      | N3 (63.94%): $s(0.00\%)p(99.65\%)$<br>C7 (36.06%): $s(0.00\%)p(99.84\%)$     |
| $\sigma(C6-C8)$   | 1.98822                | $sp^{1.85}$ at C8<br>$sp^{1.63}$ at C6   | C8 (50.54%): $s(34.96\%)p(64.85\%)$<br>C6 (49.46%): $s(38.01\%)p(61.84\%)$   |
| $\sigma(C7-C8)$   | 1.98735                | $sp^{1.89}$ at C8<br>$sp^{1.64}$ at C7   | C8 (50.36%): $s(34.53\%)p(65.28\%)$<br>C7 (49.64%): $s(37.79\%)p(62.05\%)$   |
| $\sigma(C11-C12)$ | 1.97763                | $sp^{1.73}$ at C11<br>$sp^{1.86}$ at C12 | C11 (51.11%): $s(36.63\%)p(63.26\%)$<br>C12 (48.89%): $s(34.94\%)p(64.88\%)$ |
| $\pi(C11-C12)$    | 1.63427                | n/a                                      | C11 (46.84%): $s(0.00\%)p(99.92\%)$<br>C12 (53.16%): $s(0.00\%)p(99.90\%)$   |
| $\sigma(C11-C10)$ | 1.97340                | $sp^{2.22}$ at C11<br>$sp^{1.96}$ at C10 | C11 (49.19%): $s(31.04\%)p(68.85\%)$<br>C10 (50.81%): $s(33.75\%)p(66.14\%)$ |
| Lone pair 1 (N4)  | 1.89318                | $sp^{2.73}$                              | $s(26.80\%)p(73.16\%)$                                                       |
| $\sigma(N4-C9)$   | 1.98794                | $sp^{1.57}$ at N4<br>$sp^{1.90}$ at C9   | N4 (59.68%): $s(38.83\%)p(60.79\%)$<br>C9 (40.32%): $s(34.43\%)p(65.46\%)$   |
| $\pi(N4-C9)$      | 1.86067                | n/a                                      | N4 (62.56%): $s(0.00\%)p(99.79\%)$<br>C9 (37.44%): $s(0.00\%)p(99.86\%)$     |
| $\sigma(N4-C10)$  | 1.98180                | $sp^{1.91}$ at N4<br>$sp^{2.29}$ at C10  | N4 (58.91%): $s(34.24\%)p(65.42\%)$<br>C10 (41.09%): $s(30.40\%)p(69.52\%)$  |

<sup>a</sup> Calculated in gas phase at the optimized S0 geometry using M06-2X (gas phase/ def2-tzvpp def2/j). The M06-2X functional uses 54 % Hartree-Fock exchange.<sup>23</sup>

<sup>b</sup> The general formulation of a sigma natural bond orbital (NBO) is  $\sigma_{AB} = c_A h_A + c_B h_B$ , where  $h_A$  and  $h_B$  are the atom-centered hybrid orbitals of atoms A and B, and  $c_A$  and  $c_B$  are the normalized polarization coefficients of atoms A and B. If the natural ionicity of an NBO, given by  $i_{AB} = \frac{(c_A^2 - c_B^2)}{(c_A^2 + c_B^2)}$ , exceeds a fixed limit ( $|i_{AB}| > 0.95$ ), this extremely polarized “bond” is identified instead as a lone pair.<sup>20</sup>

<sup>c</sup> Orbital occupancy ( $0 \leq x \leq 2$ ) is the number of electrons in the specified NBO. Lower orbital occupancy values are indicative of stronger delocalization.<sup>20</sup>

<sup>d</sup> Hybridization of a given NBO is of the form  $sp^\lambda$ , where  $\lambda = (\frac{\%p}{\%s})$ .<sup>20</sup> Hybridizations with a very high value of  $\lambda$  (for example,  $sp^\infty$ ) have been denoted as non-applicable.

<sup>e</sup> Atomic orbital contributions denote the percent contribution of s, p, d, and f orbitals from atom A, and the percent contribution of s, p, d, and f orbitals from atom B, to their shared NBO  $\sigma_{AB}$  or  $\pi_{AB}$ .<sup>20</sup> Contributions from d and f orbitals are negligible and are omitted for simplicity. The percent contributions from each atom A ( $c_A^2 \times 100\%$ ) and B ( $c_B^2 \times 100\%$ ) to their shared NBO are also shown.

**Table S65.** NBO analysis<sup>a</sup> of (CF<sub>3</sub>L2)<sub>2</sub>Zn with the CAM-B3LYP functional.

| NBO <sup>b</sup>  | Occupancy <sup>c</sup> | Hybridization <sup>d</sup>               | Atomic Orbital Contributions (%) <sup>e</sup>                                |
|-------------------|------------------------|------------------------------------------|------------------------------------------------------------------------------|
| Lone pair 1 (N1)  | 1.83248                | $sp^{2.89}$                              | $s(24.96\%)p(75.02\%)$                                                       |
| Lone pair 2 (N1)  | 1.56898                | n/a                                      | $s(0.00\%)p(99.92\%)$                                                        |
| $\sigma(N1-C5)$   | 1.98489                | $sp^{1.75}$ at N1<br>$sp^{2.03}$ at C5   | N1 (59.04%): $s(36.25\%)p(63.48\%)$<br>C5 (40.96%): $s(32.97\%)p(66.92\%)$   |
| $\sigma(N1-C11)$  | 1.98526                | $sp^{1.58}$ at N1<br>$sp^{2.10}$ at C11  | N1 (58.70%): $s(38.66\%)p(61.07\%)$<br>C11 (41.30%): $s(32.24\%)p(67.65\%)$  |
| Lone pair 1 (N2)  | 1.90874                | $sp^{2.20}$                              | $s(31.17\%)p(68.65\%)$                                                       |
| $\sigma(N2-C5)$   | 1.98512                | $sp^{2.05}$ at N2<br>$sp^{1.89}$ at C5   | N2 (57.56%): $s(32.58\%)p(66.92\%)$<br>C5 (42.44%): $s(34.53\%)p(65.36\%)$   |
| $\sigma(N2-C6)$   | 1.98655                | $sp^{1.75}$ at N2<br>$sp^{2.00}$ at C6   | N2 (58.78%): $s(36.12\%)p(63.36\%)$<br>C6 (41.22%): $s(33.34\%)p(66.52\%)$   |
| $\pi(N2-C6)$      | 1.75029                | n/a                                      | N2 (64.78%): $s(0.00\%)p(99.66\%)$<br>C6 (35.22%): $s(0.00\%)p(99.85\%)$     |
| Lone pair 1 (N3)  | 1.90193                | $sp^{2.21}$                              | $s(31.15\%)p(68.70\%)$                                                       |
| $\sigma(N3-C5)$   | 1.98307                | $sp^{2.18}$ at N3<br>$sp^{2.09}$ at C5   | N3 (57.84%): $s(31.32\%)p(68.22\%)$<br>C5 (42.16%): $s(32.36\%)p(67.54\%)$   |
| $\sigma(N3-C7)$   | 1.98825                | $sp^{1.66}$ at N3<br>$sp^{1.97}$ at C7   | N3 (58.84%): $s(37.37\%)p(62.12\%)$<br>C7 (41.16%): $s(33.58\%)p(66.28\%)$   |
| $\pi(N3-C7)$      | 1.78608                | n/a                                      | N3 (64.24%): $s(0.00\%)p(99.68\%)$<br>C7 (35.76%): $s(0.00\%)p(99.85\%)$     |
| $\sigma(C6-C8)$   | 1.98783                | $sp^{1.85}$ at C8<br>$sp^{1.62}$ at C6   | C8 (50.51%): $s(34.98\%)p(64.81\%)$<br>C6 (49.49%): $s(38.06\%)p(61.76\%)$   |
| $\sigma(C7-C8)$   | 1.98708                | $sp^{1.89}$ at C8<br>$sp^{1.64}$ at C7   | C8 (50.35%): $s(34.56\%)p(65.23\%)$<br>C7 (49.65%): $s(37.83\%)p(61.99\%)$   |
| $\sigma(C11-C12)$ | 1.97714                | $sp^{1.73}$ at C11<br>$sp^{1.86}$ at C12 | C11 (51.09%): $s(36.63\%)p(63.26\%)$<br>C12 (48.91%): $s(34.93\%)p(64.87\%)$ |
| $\pi(C11-C12)$    | 1.63466                | n/a                                      | C11 (46.75%): $s(0.00\%)p(99.91\%)$<br>C12 (53.25%): $s(0.00\%)p(99.90\%)$   |
| $\sigma(C11-C10)$ | 1.97336                | $sp^{2.22}$ at C11<br>$sp^{1.96}$ at C10 | C11 (49.22%): $s(31.05\%)p(68.82\%)$<br>C10 (50.78%): $s(33.74\%)p(66.13\%)$ |
| Lone pair 1 (N4)  | 1.88705                | $sp^{2.76}$                              | $s(26.60\%)p(73.37\%)$                                                       |
| $\sigma(N4-C9)$   | 1.98770                | $sp^{1.56}$ at N4<br>$sp^{1.90}$ at C9   | N4 (59.54%): $s(38.91\%)p(60.69\%)$<br>C9 (40.46%): $s(34.46\%)p(65.41\%)$   |
| $\pi(N4-C9)$      | 1.86193                | n/a                                      | N4 (62.71%): $s(0.00\%)p(99.81\%)$<br>C9 (37.29%): $s(0.00\%)p(99.86\%)$     |
| $\sigma(N4-C10)$  | 1.98194                | $sp^{1.90}$ at N4<br>$sp^{2.29}$ at C10  | N4 (58.82%): $s(34.35\%)p(65.28\%)$<br>C10 (41.18%): $s(30.38\%)p(69.51\%)$  |

<sup>a</sup> Calculated in gas phase at the optimized S0 geometry using CAM-B3LYP (gas phase/ def2-tzvpp def2/j). The CAM-B3LYP functional is a range-separated functional, and uses 19 % Hartree-Fock exchange at short range, 33 % Hartree-Fock exchange at intermediate range, and 65 % Hartree-Fock exchange at long range.<sup>15</sup>

<sup>b</sup> The general formulation of a sigma natural bond orbital (NBO) is  $\sigma_{AB} = c_A h_A + c_B h_B$ , where  $h_A$  and  $h_B$  are the atom-centered hybrid orbitals of atoms A and B, and  $c_A$  and  $c_B$  are the normalized polarization coefficients of atoms A and B. If the natural ionicity of an NBO, given by  $i_{AB} = \frac{(c_A^2 - c_B^2)}{(c_A^2 + c_B^2)}$ , exceeds a fixed limit ( $|i_{AB}| > 0.95$ ), this extremely polarized “bond” is identified instead as a lone pair.<sup>20</sup>

<sup>c</sup> Orbital occupancy ( $0 \leq x \leq 2$ ) is the number of electrons in the specified NBO. Lower orbital occupancy values are indicative of stronger delocalization.<sup>20</sup>

<sup>d</sup> Hybridization of a given NBO is of the form  $sp^\lambda$ , where  $\lambda = (\frac{\%p}{\%s})$ .<sup>20</sup> Hybridizations with a very high value of  $\lambda$  (for example,  $sp^\infty$ ) have been denoted as non-applicable.

<sup>e</sup> Atomic orbital contributions denote the percent contribution of s, p, d, and f orbitals from atom A, and the percent contribution of s, p, d, and f orbitals from atom B, to their shared NBO  $\sigma_{AB}$  or  $\pi_{AB}$ .<sup>20</sup> Contributions from d and f orbitals are negligible and are omitted for simplicity. The percent contributions from each atom A ( $c_A^2 \times 100\%$ ) and B ( $c_B^2 \times 100\%$ ) to their shared NBO are also shown.

**Table S66.** Solvated NBO analysis<sup>a</sup> of (CF<sub>3</sub>L<sub>2</sub>)<sub>2</sub>Zn with the M06-L functional.

| NBO <sup>b</sup>  | Occupancy <sup>c</sup> | Hybridization <sup>d</sup>               | Atomic Orbital Contributions (%) <sup>e</sup>                                |
|-------------------|------------------------|------------------------------------------|------------------------------------------------------------------------------|
| Lone pair 1 (N1)  | 1.82237                | $sp^{2.60}$                              | $s(27.75\%)p(72.23\%)$                                                       |
| $\sigma(N1-C5)$   | 1.98439                | $sp^{1.87}$ at N1<br>$sp^{2.02}$ at C5   | N1 (59.30%): $s(34.79\%)p(64.98\%)$<br>C5 (40.70%): $s(33.08\%)p(66.83\%)$   |
| $\pi(N1-C5)$      | 1.81909                | n/a                                      | N1 (76.40%): $s(0.00\%)p(99.92\%)$<br>C11 (23.60%): $s(0.00\%)p(99.80\%)$    |
| $\sigma(N1-C11)$  | 1.98565                | $sp^{1.67}$ at N1<br>$sp^{2.12}$ at C11  | N1 (59.07%): $s(37.32\%)p(62.46\%)$<br>C11 (40.93%): $s(32.05\%)p(67.87\%)$  |
| Lone pair 1 (N2)  | 1.90248                | $sp^{1.94}$                              | $s(33.94\%)p(65.88\%)$                                                       |
| $\sigma(N2-C5)$   | 1.98378                | $sp^{2.19}$ at N2<br>$sp^{1.90}$ at C5   | N2 (57.76%): $s(31.25\%)p(68.32\%)$<br>C5 (42.24%): $s(34.41\%)p(65.51\%)$   |
| $\sigma(N2-C6)$   | 1.98500                | $sp^{1.87}$ at N2<br>$sp^{2.00}$ at C6   | N2 (58.99%): $s(34.69\%)p(64.86\%)$<br>C6 (41.01%): $s(33.28\%)p(66.62\%)$   |
| $\pi(N2-C6)$      | 1.75701                | n/a                                      | N2 (64.49%): $s(0.00\%)p(99.69\%)$<br>C6 (35.51%): $s(0.00\%)p(99.86\%)$     |
| Lone pair 1 (N3)  | 1.89496                | $sp^{1.96}$                              | $s(33.77\%)p(66.08\%)$                                                       |
| $\sigma(N3-C5)$   | 1.98144                | $sp^{2.31}$ at N3<br>$sp^{2.08}$ at C5   | N3 (58.04%): $s(30.07\%)p(69.53\%)$<br>C5 (41.96%): $s(32.39\%)p(67.53\%)$   |
| $\sigma(N3-C7)$   | 1.98749                | $sp^{1.76}$ at N3<br>$sp^{1.98}$ at C7   | N3 (59.07%): $s(36.02\%)p(63.54\%)$<br>C7 (40.93%): $s(33.54\%)p(66.36\%)$   |
| $\pi(N3-C7)$      | 1.78850                | n/a                                      | N3 (64.08%): $s(0.00\%)p(99.71\%)$<br>C7 (35.92%): $s(0.00\%)p(99.85\%)$     |
| $\sigma(C6-C8)$   | 1.98873                | $sp^{1.85}$ at C8<br>$sp^{1.62}$ at C6   | C8 (50.44%): $s(34.97\%)p(64.84\%)$<br>C6 (49.56%): $s(38.08\%)p(61.76\%)$   |
| $\sigma(C7-C8)$   | 1.98758                | $sp^{1.89}$ at C8<br>$sp^{1.64}$ at C7   | C8 (50.29%): $s(34.55\%)p(65.27\%)$<br>C7 (49.71%): $s(37.84\%)p(62.00\%)$   |
| $\sigma(C11-C12)$ | 1.97779                | $sp^{1.73}$ at C11<br>$sp^{1.85}$ at C12 | C11 (50.89%): $s(36.55\%)p(63.33\%)$<br>C12 (49.11%): $s(35.07\%)p(64.76\%)$ |
| $\pi(C11-C12)$    | 1.63950                | n/a                                      | C11 (46.74%): $s(0.00\%)p(99.91\%)$<br>C12 (53.26%): $s(0.00\%)p(99.91\%)$   |
| $\sigma(C11-C10)$ | 1.97252                | $sp^{2.19}$ at C11<br>$sp^{1.96}$ at C10 | C11 (49.48%): $s(31.33\%)p(68.55\%)$<br>C10 (50.52%): $s(33.70\%)p(66.18\%)$ |
| Lone pair 1 (N4)  | 1.87718                | $sp^{2.45}$                              | $s(28.96\%)p(71.00\%)$                                                       |
| $\sigma(N4-C9)$   | 1.98809                | $sp^{1.63}$ at N4<br>$sp^{1.92}$ at C9   | N4 (59.84%): $s(37.90\%)p(61.76\%)$<br>C9 (40.16%): $s(34.27\%)p(65.63\%)$   |
| $\pi(N4-C9)$      | 1.84913                | n/a                                      | N4 (63.34%): $s(0.00\%)p(99.82\%)$<br>C9 (36.66%): $s(0.00\%)p(99.86\%)$     |
| $\sigma(N4-C10)$  | 1.97252                | $sp^{2.02}$ at N4<br>$sp^{2.29}$ at C10  | N4 (58.92%): $s(33.01\%)p(66.67\%)$<br>C10 (41.08%): $s(30.39\%)p(69.53\%)$  |

<sup>a</sup> Calculated in solution at the optimized S0 geometry using M06-L (SMD “dichloromethane”/ def2-tzvp def2/j). The M06-L functional uses 0 % Hartree-Fock exchange.<sup>19</sup>

<sup>b</sup> The general formulation of a sigma natural bond orbital (NBO) is  $\sigma_{AB} = c_A h_A + c_B h_B$ , where  $h_A$  and  $h_B$  are the atom-centered hybrid orbitals of atoms A and B, and  $c_A$  and  $c_B$  are the normalized polarization coefficients of atoms A and B. If the natural ionicity of an NBO, given by  $i_{AB} = \frac{(c_A^2 - c_B^2)}{(c_A^2 + c_B^2)}$ , exceeds a fixed limit ( $|i_{AB}| > 0.95$ ), this extremely polarized “bond” is identified instead as a lone pair.<sup>20</sup>

<sup>c</sup> Orbital occupancy ( $0 \leq x \leq 2$ ) is the number of electrons in the specified NBO. Lower orbital occupancy values are indicative of stronger delocalization.<sup>20</sup>

<sup>d</sup> Hybridization of a given NBO is of the form  $sp^\lambda$ , where  $\lambda = \left(\frac{\%p}{\%s}\right)$ .<sup>20</sup> Hybridizations with a very high value of  $\lambda$  (for example,  $sp^\infty$ ) have been denoted as non-applicable.

<sup>e</sup> Atomic orbital contributions denote the percent contribution of s, p, d, and f orbitals from atom A, and the percent contribution of s, p, d, and f orbitals from atom B, to their shared NBO  $\sigma_{AB}$  or  $\pi_{AB}$ .<sup>20</sup> Contributions from d and f orbitals are negligible and are omitted for simplicity. The percent contributions from each atom A ( $c_A^2 \times 100\%$ ) and B ( $c_B^2 \times 100\%$ ) to their shared NBO are also shown.

**Table S67.** Solvated NBO analysis<sup>a</sup> of (CF<sub>3</sub>L<sub>2</sub>)<sub>2</sub>Zn with the TPSSh functional.

| NBO <sup>b</sup>  | Occupancy <sup>c</sup> | Hybridization <sup>d</sup>               | Atomic Orbital Contributions (%) <sup>e</sup>                                |
|-------------------|------------------------|------------------------------------------|------------------------------------------------------------------------------|
| Lone pair 1 (N1)  | 1.82218                | $sp^{2.82}$                              | $s(26.18\%)p(73.80\%)$                                                       |
| $\sigma(N1-C5)$   | 1.98474                | $sp^{1.80}$ at N1<br>$sp^{2.03}$ at C5   | N1 (59.08%): $s(35.57\%)p(64.17\%)$<br>C5 (40.92%): $s(32.98\%)p(66.92\%)$   |
| $\pi(N1-C5)$      | 1.82168                | n/a                                      | N1 (76.52%): $s(0.00\%)p(99.93\%)$<br>C11 (23.48%): $s(0.00\%)p(99.80\%)$    |
| $\sigma(N1-C11)$  | 1.98548                | $sp^{1.62}$ at N1<br>$sp^{2.11}$ at C11  | N1 (58.82%): $s(38.10\%)p(61.65\%)$<br>C11 (41.18%): $s(32.14\%)p(67.76\%)$  |
| Lone pair 1 (N2)  | 1.90474                | $sp^{2.06}$                              | $s(32.58\%)p(67.26\%)$                                                       |
| $\sigma(N2-C5)$   | 1.98472                | $sp^{2.12}$ at N2<br>$sp^{1.90}$ at C5   | N2 (57.73%): $s(31.91\%)p(67.63\%)$<br>C5 (42.27%): $s(34.49\%)p(65.41\%)$   |
| $\sigma(N2-C6)$   | 1.98586                | $sp^{1.81}$ at N2<br>$sp^{2.01}$ at C6   | N2 (58.96%): $s(35.39\%)p(64.13\%)$<br>C6 (41.04%): $s(33.14\%)p(66.73\%)$   |
| $\pi(N2-C6)$      | 1.75431                | n/a                                      | N2 (64.52%): $s(0.00\%)p(99.69\%)$<br>C6 (35.48%): $s(0.00\%)p(99.85\%)$     |
| Lone pair 1 (N3)  | 1.89582                | $sp^{2.07}$                              | $s(32.49\%)p(67.38\%)$                                                       |
| $\sigma(N3-C5)$   | 1.98255                | $sp^{2.25}$ at N3<br>$sp^{2.08}$ at C5   | N3 (57.79%): $s(30.66\%)p(68.91\%)$<br>C5 (42.21%): $s(32.40\%)p(67.51\%)$   |
| $\sigma(N3-C7)$   | 1.98807                | $sp^{1.71}$ at N3<br>$sp^{1.99}$ at C7   | N3 (59.05%): $s(36.70\%)p(62.84\%)$<br>C7 (40.95%): $s(33.39\%)p(66.48\%)$   |
| $\pi(N3-C7)$      | 1.78626                | n/a                                      | N3 (64.03%): $s(0.00\%)p(99.72\%)$<br>C7 (35.97%): $s(0.00\%)p(99.85\%)$     |
| $\sigma(C6-C8)$   | 1.98876                | $sp^{1.86}$ at C8<br>$sp^{1.63}$ at C6   | C8 (50.44%): $s(34.84\%)p(64.97\%)$<br>C6 (49.56%): $s(37.99\%)p(61.84\%)$   |
| $\sigma(C7-C8)$   | 1.98255                | $sp^{1.90}$ at C8<br>$sp^{1.64}$ at C7   | C8 (50.29%): $s(34.42\%)p(65.39\%)$<br>C7 (49.71%): $s(37.76\%)p(62.08\%)$   |
| $\sigma(C11-C12)$ | 1.97707                | $sp^{1.73}$ at C11<br>$sp^{1.86}$ at C12 | C11 (51.07%): $s(36.61\%)p(63.28\%)$<br>C12 (48.93%): $s(34.93\%)p(64.89\%)$ |
| $\pi(C11-C12)$    | 1.64008                | n/a                                      | C11 (47.31%): $s(0.00\%)p(99.92\%)$<br>C12 (52.69%): $s(0.00\%)p(99.91\%)$   |
| $\sigma(C11-C10)$ | 1.97250                | $sp^{2.20}$ at C11<br>$sp^{1.97}$ at C10 | C11 (49.46%): $s(31.18\%)p(68.70\%)$<br>C10 (50.54%): $s(33.62\%)p(66.26\%)$ |
| Lone pair 1 (N4)  | 1.87731                | $sp^{2.60}$                              | $s(27.80\%)p(72.17\%)$                                                       |
| $\sigma(N4-C9)$   | 1.98811                | $sp^{1.59}$ at N4<br>$sp^{1.92}$ at C9   | N4 (59.78%): $s(38.46\%)p(61.17\%)$<br>C9 (40.22%): $s(34.22\%)p(65.65\%)$   |
| $\pi(N4-C9)$      | 1.84868                | n/a                                      | N4 (63.61%): $s(0.00\%)p(99.83\%)$<br>C9 (36.39%): $s(0.00\%)p(99.86\%)$     |
| $\sigma(N4-C10)$  | 1.98190                | $sp^{1.97}$ at N4<br>$sp^{2.28}$ at C10  | N4 (58.67%): $s(33.60\%)p(66.06\%)$<br>C10 (41.33%): $s(30.48\%)p(69.42\%)$  |

<sup>a</sup> Calculated in solution at the optimized S0 geometry using TPSSh (SMD “dichloromethane”/ def2-tzvp def2/j). The TPSSh functional uses 10 % Hartree-Fock exchange.<sup>11</sup>

<sup>b</sup> The general formulation of a sigma natural bond orbital (NBO) is  $\sigma_{AB} = c_A h_A + c_B h_B$ , where  $h_A$  and  $h_B$  are the atom-centered hybrid orbitals of atoms A and B, and  $c_A$  and  $c_B$  are the normalized polarization coefficients of atoms A and B. If the natural ionicity of an NBO, given by  $i_{AB} = \frac{(c_A^2 - c_B^2)}{(c_A^2 + c_B^2)}$ , exceeds a fixed limit ( $|i_{AB}| > 0.95$ ), this extremely polarized “bond” is identified instead as a lone pair.<sup>20</sup>

<sup>c</sup> Orbital occupancy ( $0 \leq x \leq 2$ ) is the number of electrons in the specified NBO. Lower orbital occupancy values are indicative of stronger delocalization.<sup>20</sup>

<sup>d</sup> Hybridization of a given NBO is of the form  $sp^\lambda$ , where  $\lambda = \left(\frac{\%p}{\%s}\right)$ .<sup>20</sup> Hybridizations with a very high value of  $\lambda$  (for example,  $sp^\infty$ ) have been denoted as non-applicable.

<sup>e</sup> Atomic orbital contributions denote the percent contribution of s, p, d, and f orbitals from atom A, and the percent contribution of s, p, d, and f orbitals from atom B, to their shared NBO  $\sigma_{AB}$  or  $\pi_{AB}$ .<sup>20</sup> Contributions from d and f orbitals are negligible and are omitted for simplicity. The percent contributions from each atom A ( $c_A^2 \times 100\%$ ) and B ( $c_B^2 \times 100\%$ ) to their shared NBO are also shown.

**Table S6.** Solvated NBO analysis<sup>a</sup> of (C<sup>F3</sup>L2)<sub>2</sub>Zn with the O3LYP functional.

| NBO <sup>b</sup>  | Occupancy <sup>c</sup> | Hybridization <sup>d</sup>               | Atomic Orbital Contributions (%) <sup>e</sup>                                |
|-------------------|------------------------|------------------------------------------|------------------------------------------------------------------------------|
| Lone pair 1 (N1)  | 1.82122                | $sp^{2.87}$                              | $s(25.86\%)p(74.13\%)$                                                       |
| $\sigma(N1-C5)$   | 1.98461                | $sp^{1.79}$ at N1<br>$sp^{2.03}$ at C5   | N1 (58.97%): $s(35.74\%)p(64.01\%)$<br>C5 (41.03%): $s(32.93\%)p(66.97\%)$   |
| $\pi(N1-C5)$      | 1.82080                | n/a                                      | N1 (76.36%): $s(0.00\%)p(99.93\%)$<br>C11 (23.64%): $s(0.00\%)p(99.81\%)$    |
| $\sigma(N1-C11)$  | 1.98526                | $sp^{1.61}$ at N1<br>$sp^{2.10}$ at C11  | N1 (58.69%): $s(38.26\%)p(61.50\%)$<br>C11 (41.31%): $s(32.19\%)p(67.71\%)$  |
| Lone pair 1 (N2)  | 1.90188                | $sp^{2.08}$                              | $s(32.38\%)p(67.44\%)$                                                       |
| $\sigma(N2-C5)$   | 1.98469                | $sp^{2.11}$ at N2<br>$sp^{1.89}$ at C5   | N2 (57.43%): $s(31.99\%)p(67.56\%)$<br>C5 (42.57%): $s(34.56\%)p(65.34\%)$   |
| $\sigma(N2-C6)$   | 1.98576                | $sp^{1.80}$ at N2<br>$sp^{2.01}$ at C6   | N2 (58.85%): $s(35.51\%)p(64.01\%)$<br>C6 (41.15%): $s(33.14\%)p(66.74\%)$   |
| $\pi(N2-C6)$      | 1.75524                | n/a                                      | N2 (64.36%): $s(0.00\%)p(99.68\%)$<br>C6 (35.64%): $s(0.00\%)p(99.86\%)$     |
| Lone pair 1 (N3)  | 1.89378                | $sp^{2.09}$                              | $s(32.32\%)p(67.53\%)$                                                       |
| $\sigma(N3-C5)$   | 1.98243                | $sp^{2.24}$ at N3<br>$sp^{2.09}$ at C5   | N3 (57.68%): $s(30.73\%)p(68.85\%)$<br>C5 (42.32%): $s(32.38\%)p(67.53\%)$   |
| $\sigma(N3-C7)$   | 1.98791                | $sp^{1.70}$ at N3<br>$sp^{1.99}$ at C7   | N3 (58.92%): $s(36.80\%)p(62.74\%)$<br>C7 (41.08%): $s(33.37\%)p(66.50\%)$   |
| $\pi(N3-C7)$      | 1.78670                | n/a                                      | N3 (63.85%): $s(0.00\%)p(99.71\%)$<br>C7 (36.15%): $s(0.00\%)p(99.86\%)$     |
| $\sigma(C6-C8)$   | 1.98819                | $sp^{1.87}$ at C8<br>$sp^{1.63}$ at C6   | C8 (50.45%): $s(34.81\%)p(65.01\%)$<br>C6 (49.55%): $s(37.98\%)p(61.87\%)$   |
| $\sigma(C7-C8)$   | 1.98713                | $sp^{1.90}$ at C8<br>$sp^{1.65}$ at C7   | C8 (50.31%): $s(34.40\%)p(65.43\%)$<br>C7 (49.69%): $s(37.74\%)p(62.11\%)$   |
| $\sigma(C11-C12)$ | 1.97654                | $sp^{1.73}$ at C11<br>$sp^{1.86}$ at C12 | C11 (51.05%): $s(36.63\%)p(63.27\%)$<br>C12 (48.95%): $s(34.87\%)p(64.96\%)$ |
| $\pi(C11-C12)$    | 1.63934                | n/a                                      | C11 (47.38%): $s(0.00\%)p(99.92\%)$<br>C12 (52.62%): $s(0.00\%)p(99.91\%)$   |
| $\sigma(C11-C10)$ | 1.97204                | $sp^{2.21}$ at C11<br>$sp^{1.97}$ at C10 | C11 (49.49%): $s(31.12\%)p(68.78\%)$<br>C10 (50.51%): $s(33.58\%)p(66.31\%)$ |
| Lone pair 1 (N4)  | 1.87537                | $sp^{2.61}$                              | $s(27.67\%)p(72.29\%)$                                                       |
| $\sigma(N4-C9)$   | 1.98791                | $sp^{1.58}$ at N4<br>$sp^{1.92}$ at C9   | N4 (59.66%): $s(38.57\%)p(61.07\%)$<br>C9 (40.34%): $s(34.21\%)p(65.67\%)$   |
| $\pi(N4-C9)$      | 1.84951                | n/a                                      | N4 (63.54%): $s(0.00\%)p(99.83\%)$<br>C9 (36.46%): $s(0.00\%)p(99.87\%)$     |
| $\sigma(N4-C10)$  | 1.98168                | $sp^{1.96}$ at N4<br>$sp^{2.27}$ at C10  | N4 (58.51%): $s(33.62\%)p(66.05\%)$<br>C10 (41.49%): $s(30.54\%)p(69.36\%)$  |

<sup>a</sup> Calculated in solution at the optimized S0 geometry using O3LYP (SMD “dichloromethane”/ def2-tzvpp def2/j). The O3LYP functional uses 11.61 % Hartree-Fock exchange.<sup>21</sup>

<sup>b</sup> The general formulation of a sigma natural bond orbital (NBO) is  $\sigma_{AB} = c_A h_A + c_B h_B$ , where  $h_A$  and  $h_B$  are the atom-centered hybrid orbitals of atoms A and B, and  $c_A$  and  $c_B$  are the normalized polarization coefficients of atoms A and B. If the natural ionicity of an NBO, given by  $i_{AB} = \frac{(c_A^2 - c_B^2)}{(c_A^2 + c_B^2)}$ , exceeds a fixed limit ( $|i_{AB}| > 0.95$ ), this extremely polarized “bond” is identified instead as a lone pair.<sup>20</sup>

<sup>c</sup> Orbital occupancy ( $0 \leq x \leq 2$ ) is the number of electrons in the specified NBO. Lower orbital occupancy values are indicative of stronger delocalization.<sup>20</sup>

<sup>d</sup> Hybridization of a given NBO is of the form  $sp^\lambda$ , where  $\lambda = \left(\frac{\%p}{\%s}\right)$ .<sup>20</sup> Hybridizations with a very high value of  $\lambda$  (for example,  $sp^\infty$ ) have been denoted as non-applicable.

<sup>e</sup> Atomic orbital contributions denote the percent contribution of s, p, d, and f orbitals from atom A, and the percent contribution of s, p, d, and f orbitals from atom B, to their shared NBO  $\sigma_{AB}$  or  $\pi_{AB}$ .<sup>20</sup> Contributions from d and f orbitals are negligible and are omitted for simplicity. The percent contributions from each atom A ( $c_A^2 \times 100\%$ ) and B ( $c_B^2 \times 100\%$ ) to their shared NBO are also shown.

**Table S69.** Solvated NBO analysis<sup>a</sup> of (CF<sub>3</sub>L<sub>2</sub>)<sub>2</sub>Zn with the B3LYP functional.

| NBO <sup>b</sup>  | Occupancy <sup>c</sup> | Hybridization <sup>d</sup>               | Atomic Orbital Contributions (%) <sup>e</sup>                                |
|-------------------|------------------------|------------------------------------------|------------------------------------------------------------------------------|
| Lone pair 1 (N1)  | 1.82588                | $sp^{2.90}$                              | $s(25.64\%)p(74.34\%)$                                                       |
| $\sigma(N1-C5)$   | 1.98466                | $sp^{1.78}$ at N1<br>$sp^{2.03}$ at C5   | N1 (59.03%): $s(35.83\%)p(63.91\%)$<br>C5 (40.97%): $s(32.94\%)p(66.95\%)$   |
| $\pi(N1-C5)$      | 1.82511                | n/a                                      | N1 (77.14%): $s(0.00\%)p(99.93\%)$<br>C11 (22.86%): $s(0.00\%)p(99.81\%)$    |
| $\sigma(N1-C11)$  | 1.98534                | $sp^{1.60}$ at N1<br>$sp^{2.10}$ at C11  | N1 (58.79%): $s(38.39\%)p(61.36\%)$<br>C11 (41.21%): $s(32.19\%)p(67.70\%)$  |
| Lone pair 1 (N2)  | 1.90611                | $sp^{2.15}$                              | $s(31.69\%)p(68.14\%)$                                                       |
| $\sigma(N2-C5)$   | 1.98479                | $sp^{2.08}$ at N2<br>$sp^{1.89}$ at C5   | N2 (57.59%): $s(32.31\%)p(67.21\%)$<br>C5 (42.41%): $s(34.53\%)p(65.36\%)$   |
| $\sigma(N2-C6)$   | 1.98624                | $sp^{1.77}$ at N2<br>$sp^{2.01}$ at C6   | N2 (58.98%): $s(35.88\%)p(63.62\%)$<br>C6 (41.02%): $s(33.20\%)p(66.67\%)$   |
| $\pi(N2-C6)$      | 1.75515                | n/a                                      | N2 (64.90%): $s(0.00\%)p(99.69\%)$<br>C6 (35.10%): $s(0.00\%)p(99.87\%)$     |
| Lone pair 1 (N3)  | 1.89808                | $sp^{2.15}$                              | $s(31.70\%)p(68.16\%)$                                                       |
| $\sigma(N3-C5)$   | 1.98271                | $sp^{2.21}$ at N3<br>$sp^{2.08}$ at C5   | N3 (57.84%): $s(31.04\%)p(68.52\%)$<br>C5 (42.16%): $s(32.39\%)p(67.51\%)$   |
| $\sigma(N3-C7)$   | 1.98815                | $sp^{1.68}$ at N3<br>$sp^{1.99}$ at C7   | N3 (59.03%): $s(37.11\%)p(62.40\%)$<br>C7 (40.97%): $s(33.43\%)p(66.43\%)$   |
| $\pi(N3-C7)$      | 1.78761                | n/a                                      | N3 (64.34%): $s(0.00\%)p(99.72\%)$<br>C7 (35.66%): $s(0.00\%)p(99.86\%)$     |
| $\sigma(C6-C8)$   | 1.98816                | $sp^{1.86}$ at C8<br>$sp^{1.62}$ at C6   | C8 (50.41%): $s(34.85\%)p(64.94\%)$<br>C6 (49.59%): $s(38.05\%)p(61.78\%)$   |
| $\sigma(C7-C8)$   | 1.98721                | $sp^{1.90}$ at C8<br>$sp^{1.64}$ at C7   | C8 (50.28%): $s(34.44\%)p(65.36\%)$<br>C7 (49.72%): $s(37.80\%)p(62.02\%)$   |
| $\sigma(C11-C12)$ | 1.97685                | $sp^{1.73}$ at C11<br>$sp^{1.86}$ at C12 | C11 (51.03%): $s(36.59\%)p(63.29\%)$<br>C12 (48.97%): $s(34.95\%)p(64.85\%)$ |
| $\pi(C11-C12)$    | 1.64238                | n/a                                      | C11 (46.89%): $s(0.00\%)p(99.92\%)$<br>C12 (53.11%): $s(0.00\%)p(99.91\%)$   |
| $\sigma(C11-C10)$ | 1.97257                | $sp^{2.21}$ at C11<br>$sp^{1.97}$ at C10 | C11 (49.47%): $s(31.13\%)p(68.75\%)$<br>C10 (50.53%): $s(33.59\%)p(66.29\%)$ |
| Lone pair 1 (N4)  | 1.88023                | $sp^{2.67}$                              | $s(27.21\%)p(72.76\%)$                                                       |
| $\sigma(N4-C9)$   | 1.98784                | $sp^{1.57}$ at N4<br>$sp^{1.91}$ at C9   | N4 (59.74%): $s(38.78\%)p(60.84\%)$<br>C9 (40.26%): $s(34.27\%)p(65.60\%)$   |
| $\pi(N4-C9)$      | 1.85177                | n/a                                      | N4 (63.69%): $s(0.00\%)p(99.83\%)$<br>C9 (36.31%): $s(0.00\%)p(99.87\%)$     |
| $\sigma(N4-C10)$  | 1.98188                | $sp^{1.94}$ at N4<br>$sp^{2.27}$ at C10  | N4 (58.68%): $s(33.89\%)p(65.77\%)$<br>C10 (41.32%): $s(30.54\%)p(69.36\%)$  |

<sup>a</sup> Calculated in solution at the optimized S0 geometry using B3LYP (SMD “dichloromethane”/ def2-tzvpp def2/j). The B3LYP functional uses 20 % Hartree-Fock exchange.<sup>22</sup>

<sup>b</sup> The general formulation of a sigma natural bond orbital (NBO) is  $\sigma_{AB} = c_A h_A + c_B h_B$ , where  $h_A$  and  $h_B$  are the atom-centered hybrid orbitals of atoms A and B, and  $c_A$  and  $c_B$  are the normalized polarization coefficients of atoms A and B. If the natural ionicity of an NBO, given by  $i_{AB} = \frac{(c_A^2 - c_B^2)}{(c_A^2 + c_B^2)}$ , exceeds a fixed limit ( $|i_{AB}| > 0.95$ ), this extremely polarized “bond” is identified instead as a lone pair.<sup>20</sup>

<sup>c</sup> Orbital occupancy ( $0 \leq x \leq 2$ ) is the number of electrons in the specified NBO. Lower orbital occupancy values are indicative of stronger delocalization.<sup>20</sup>

<sup>d</sup> Hybridization of a given NBO is of the form  $sp^\lambda$ , where  $\lambda = \left(\frac{\%p}{\%s}\right)$ .<sup>20</sup> Hybridizations with a very high value of  $\lambda$  (for example,  $sp^\infty$ ) have been denoted as non-applicable.

<sup>e</sup> Atomic orbital contributions denote the percent contribution of s, p, d, and f orbitals from atom A, and the percent contribution of s, p, d, and f orbitals from atom B, to their shared NBO  $\sigma_{AB}$  or  $\pi_{AB}$ .<sup>20</sup> Contributions from d and f orbitals are negligible and are omitted for simplicity. The percent contributions from each atom A ( $c_A^2 \times 100\%$ ) and B ( $c_B^2 \times 100\%$ ) to their shared NBO are also shown.

**Table S70.** Solvated NBO analysis<sup>a</sup> of (CF<sub>3</sub>L<sub>2</sub>)<sub>2</sub>Zn with the PBE0 functional.

| NBO <sup>b</sup>  | Occupancy <sup>c</sup> | Hybridization <sup>d</sup>               | Atomic Orbital Contributions (%) <sup>e</sup>                                |
|-------------------|------------------------|------------------------------------------|------------------------------------------------------------------------------|
| Lone pair 1 (N1)  | 1.82887                | $sp^{2.91}$                              | $s(25.59\%)p(74.39\%)$                                                       |
| Lone pair 2 (N1)  | 1.55029                | n/a                                      | $s(0.00\%)p(99.92\%)$                                                        |
| $\sigma(N1-C5)$   | 1.98493                | $sp^{1.78}$ at N1<br>$sp^{2.03}$ at C5   | N1 (59.04%): $s(35.88\%)p(63.85\%)$<br>C5 (40.96%): $s(32.95\%)p(66.95\%)$   |
| $\sigma(N1-C11)$  | 1.98545                | $sp^{1.60}$ at N1<br>$sp^{2.10}$ at C11  | N1 (58.72%): $s(38.39\%)p(61.35\%)$<br>C11 (41.28%): $s(32.20\%)p(67.70\%)$  |
| Lone pair 1 (N2)  | 1.90638                | $sp^{2.12}$                              | $s(32.00\%)p(67.82\%)$                                                       |
| $\sigma(N2-C5)$   | 1.98503                | $sp^{2.09}$ at N2<br>$sp^{1.89}$ at C5   | N2 (57.52%): $s(32.19\%)p(67.32\%)$<br>C5 (42.48%): $s(34.54\%)p(65.36\%)$   |
| $\sigma(N2-C6)$   | 1.98626                | $sp^{1.79}$ at N2<br>$sp^{2.01}$ at C6   | N2 (58.90%): $s(35.67\%)p(63.81\%)$<br>C6 (41.10%): $s(33.16\%)p(66.71\%)$   |
| $\pi(N2-C6)$      | 1.75429                | n/a                                      | N2 (65.07%): $s(0.00\%)p(99.67\%)$<br>C6 (34.93%): $s(0.00\%)p(99.85\%)$     |
| Lone pair 1 (N3)  | 1.89349                | $sp^{2.13}$                              | $s(31.92\%)p(67.93\%)$                                                       |
| $\sigma(N3-C5)$   | 1.98503                | $sp^{2.09}$ at N3<br>$sp^{1.89}$ at C5   | N3 (57.52%): $s(32.19\%)p(67.32\%)$<br>C5 (42.48%): $s(34.54\%)p(65.36\%)$   |
| $\sigma(N3-C7)$   | 1.98827                | $sp^{1.69}$ at N3<br>$sp^{1.99}$ at C7   | N3 (58.97%): $s(36.97\%)p(62.53\%)$<br>C7 (41.03%): $s(33.39\%)p(66.47\%)$   |
| $\pi(N3-C7)$      | 1.78714                | n/a                                      | N3 (64.54%): $s(0.00\%)p(99.69\%)$<br>C7 (35.46%): $s(0.00\%)p(99.84\%)$     |
| $\sigma(C6-C8)$   | 1.98841                | $sp^{1.87}$ at C8<br>$sp^{1.63}$ at C6   | C8 (50.46%): $s(34.80\%)p(65.00\%)$<br>C6 (49.54%): $s(37.97\%)p(61.86\%)$   |
| $\sigma(C7-C8)$   | 1.98743                | $sp^{1.90}$ at C8<br>$sp^{1.65}$ at C7   | C8 (50.33%): $s(34.39\%)p(65.42\%)$<br>C7 (49.67%): $s(37.73\%)p(62.10\%)$   |
| $\sigma(C11-C12)$ | 1.97704                | $sp^{1.73}$ at C11<br>$sp^{1.86}$ at C12 | C11 (51.01%): $s(36.60\%)p(63.29\%)$<br>C12 (48.99%): $s(34.93\%)p(64.89\%)$ |
| $\pi(C11-C12)$    | 1.64397                | n/a                                      | C11 (46.89%): $s(0.00\%)p(99.91\%)$<br>C12 (53.11%): $s(0.00\%)p(99.91\%)$   |
| $\sigma(C11-C10)$ | 1.97277                | $sp^{2.21}$ at C11<br>$sp^{1.97}$ at C10 | C11 (49.45%): $s(31.13\%)p(68.76\%)$<br>C10 (50.55%): $s(33.60\%)p(66.28\%)$ |
| Lone pair 1 (N4)  | 1.88150                | $sp^{2.66}$                              | $s(27.35\%)p(72.62\%)$                                                       |
| $\sigma(N4-C9)$   | 1.98807                | $sp^{1.57}$ at N4<br>$sp^{1.92}$ at C9   | N4 (59.70%): $s(38.68\%)p(60.92\%)$<br>C9 (40.30%): $s(34.25\%)p(65.62\%)$   |
| $\pi(N4-C9)$      | 1.85266                | n/a                                      | N4 (63.87%): $s(0.00\%)p(99.82\%)$<br>C9 (36.13%): $s(0.00\%)p(99.85\%)$     |
| $\sigma(N4-C10)$  | 1.98208                | $sp^{1.95}$ at N4<br>$sp^{2.27}$ at C10  | N4 (58.57%): $s(33.83\%)p(65.82\%)$<br>C10 (41.43%): $s(30.53\%)p(69.37\%)$  |

<sup>a</sup> Calculated in solution at the optimized S0 geometry using PBE0 (SMD “dichloromethane”/ def2-tzvp def2/j). The PBE0 functional uses 25 % Hartree-Fock exchange.<sup>14</sup>

<sup>b</sup> The general formulation of a sigma natural bond orbital (NBO) is  $\sigma_{AB} = c_A h_A + c_B h_B$ , where  $h_A$  and  $h_B$  are the atom-centered hybrid orbitals of atoms A and B, and  $c_A$  and  $c_B$  are the normalized polarization coefficients of atoms A and B. If the natural ionicity of an NBO, given by  $i_{AB} = \frac{(c_A^2 - c_B^2)}{(c_A^2 + c_B^2)}$ , exceeds a fixed limit ( $|i_{AB}| > 0.95$ ), this extremely polarized “bond” is identified instead as a lone pair.<sup>20</sup>

<sup>c</sup> Orbital occupancy ( $0 \leq x \leq 2$ ) is the number of electrons in the specified NBO. Lower orbital occupancy values are indicative of stronger delocalization.<sup>20</sup>

<sup>d</sup> Hybridization of a given NBO is of the form  $sp^\lambda$ , where  $\lambda = (\frac{\%p}{\%s})$ .<sup>20</sup> Hybridizations with a very high value of  $\lambda$  (for example,  $sp^\infty$ ) have been denoted as non-applicable.

<sup>e</sup> Atomic orbital contributions denote the percent contribution of s, p, d, and f orbitals from atom A, and the percent contribution of s, p, d, and f orbitals from atom B, to their shared NBO  $\sigma_{AB}$  or  $\pi_{AB}$ .<sup>20</sup> Contributions from d and f orbitals are negligible and are omitted for simplicity. The percent contributions from each atom A ( $c_A^2 \times 100\%$ ) and B ( $c_B^2 \times 100\%$ ) to their shared NBO are also shown.

**Table S71.** Solvated NBO analysis<sup>a</sup> of (C<sup>F3</sup>L2)<sub>2</sub>Zn with the M06 functional.

| NBO <sup>b</sup>  | Occupancy <sup>c</sup> | Hybridization <sup>d</sup>               | Atomic Orbital Contributions (%) <sup>e</sup>                                |
|-------------------|------------------------|------------------------------------------|------------------------------------------------------------------------------|
| Lone pair 1 (N1)  | 1.82004                | $sp^{2.88}$                              | $s(25.79\%)p(74.19\%)$                                                       |
| Lone pair 2 (N1)  | 1.56231                | n/a                                      | $s(0.00\%)p(99.91\%)$                                                        |
| $\sigma(N1-C5)$   | 1.98452                | $sp^{1.79}$ at N1<br>$sp^{2.03}$ at C5   | N1 (59.27%): $s(35.74\%)p(64.05\%)$<br>C5 (40.73%): $s(33.00\%)p(66.92\%)$   |
| $\sigma(N1-C11)$  | 1.98536                | $sp^{1.60}$ at N1<br>$sp^{2.11}$ at C11  | N1 (59.00%): $s(38.34\%)p(61.45\%)$<br>C11 (41.00%): $s(32.16\%)p(67.76\%)$  |
| Lone pair 1 (N2)  | 1.90455                | $sp^{2.11}$                              | $s(32.13\%)p(67.66\%)$                                                       |
| $\sigma(N2-C5)$   | 1.98417                | $sp^{2.09}$ at N2<br>$sp^{1.90}$ at C5   | N2 (57.80%): $s(32.20\%)p(67.39\%)$<br>C5 (42.20%): $s(34.51\%)p(65.41\%)$   |
| $\sigma(N2-C6)$   | 1.98570                | $sp^{1.80}$ at N2<br>$sp^{2.00}$ at C6   | N2 (59.03%): $s(35.56\%)p(64.00\%)$<br>C6 (40.97%): $s(33.25\%)p(66.66\%)$   |
| $\pi(N2-C6)$      | 1.75575                | n/a                                      | N2 (65.86%): $s(0.00\%)p(99.66\%)$<br>C6 (34.14%): $s(0.00\%)p(99.84\%)$     |
| Lone pair 1 (N3)  | 1.89679                | $sp^{2.11}$                              | $s(32.11\%)p(67.72\%)$                                                       |
| $\sigma(N3-C5)$   | 1.98212                | $sp^{2.22}$ at N3<br>$sp^{2.09}$ at C5   | N3 (58.05%): $s(30.97\%)p(68.64\%)$<br>C5 (41.95%): $s(32.38\%)p(67.55\%)$   |
| $\sigma(N3-C7)$   | 1.98786                | $sp^{1.70}$ at N3<br>$sp^{1.98}$ at C7   | N3 (59.05%): $s(36.97\%)p(62.79\%)$<br>C7 (40.95%): $s(33.53\%)p(66.37\%)$   |
| $\pi(N3-C7)$      | 1.78919                | n/a                                      | N3 (65.38%): $s(0.00\%)p(99.68\%)$<br>C7 (34.62%): $s(0.00\%)p(99.84\%)$     |
| $\sigma(C6-C8)$   | 1.98797                | $sp^{1.86}$ at C8<br>$sp^{1.62}$ at C6   | C8 (50.42%): $s(34.89\%)p(64.94\%)$<br>C6 (49.58%): $s(38.09\%)p(61.77\%)$   |
| $\sigma(C7-C8)$   | 1.98690                | $sp^{1.90}$ at C8<br>$sp^{1.64}$ at C7   | C8 (50.28%): $s(34.48\%)p(65.35\%)$<br>C7 (49.72%): $s(37.81\%)p(62.04\%)$   |
| $\sigma(C11-C12)$ | 1.97661                | $sp^{1.73}$ at C11<br>$sp^{1.85}$ at C12 | C11 (50.92%): $s(36.59\%)p(63.31\%)$<br>C12 (49.08%): $s(35.06\%)p(64.78\%)$ |
| $\pi(C11-C12)$    | 1.64542                | n/a                                      | C11 (46.33%): $s(0.00\%)p(99.91\%)$<br>C12 (53.67%): $s(0.00\%)p(99.91\%)$   |
| $\sigma(C11-C10)$ | 1.97221                | $sp^{2.20}$ at C11<br>$sp^{1.97}$ at C10 | C11 (49.48%): $s(31.19\%)p(68.70\%)$<br>C10 (50.52%): $s(33.63\%)p(66.26\%)$ |
| Lone pair 1 (N4)  | 1.87873                | $sp^{2.66}$                              | $s(27.31\%)p(72.64\%)$                                                       |
| $\sigma(N4-C9)$   | 1.98785                | $sp^{1.58}$ at N4<br>$sp^{1.91}$ at C9   | N4 (59.81%): $s(38.65\%)p(61.03\%)$<br>C9 (40.19%): $s(34.35\%)p(65.55\%)$   |
| $\pi(N4-C9)$      | 1.85680                | n/a                                      | N4 (64.40%): $s(0.00\%)p(99.80\%)$<br>C9 (35.60%): $s(0.00\%)p(99.84\%)$     |
| $\sigma(N4-C10)$  | 1.98152                | $sp^{1.94}$ at N4<br>$sp^{2.28}$ at C10  | N4 (58.90%): $s(33.93\%)p(65.77\%)$<br>C10 (41.10%): $s(30.47\%)p(69.45\%)$  |

<sup>a</sup> Calculated in solution at the optimized S0 geometry using M06 (SMD “dichloromethane”/ def2-tzvpp def2/j). The M06 functional uses 27 % Hartree-Fock exchange.<sup>23</sup>

<sup>b</sup> The general formulation of a sigma natural bond orbital (NBO) is  $\sigma_{AB} = c_A h_A + c_B h_B$ , where  $h_A$  and  $h_B$  are the atom-centered hybrid orbitals of atoms A and B, and  $c_A$  and  $c_B$  are the normalized polarization coefficients of atoms A and B. If the natural ionicity of an NBO, given by  $i_{AB} = \frac{(c_A^2 - c_B^2)}{(c_A^2 + c_B^2)}$ , exceeds a fixed limit ( $|i_{AB}| > 0.95$ ), this extremely polarized “bond” is identified instead as a lone pair.<sup>20</sup>

<sup>c</sup> Orbital occupancy ( $0 \leq x \leq 2$ ) is the number of electrons in the specified NBO. Lower orbital occupancy values are indicative of stronger delocalization.<sup>20</sup>

<sup>d</sup> Hybridization of a given NBO is of the form  $sp^\lambda$ , where  $\lambda = (\frac{\%p}{\%s})$ .<sup>20</sup> Hybridizations with a very high value of  $\lambda$  (for example,  $sp^\infty$ ) have been denoted as non-applicable.

<sup>e</sup> Atomic orbital contributions denote the percent contribution of s, p, d, and f orbitals from atom A, and the percent contribution of s, p, d, and f orbitals from atom B, to their shared NBO  $\sigma_{AB}$  or  $\pi_{AB}$ .<sup>20</sup> Contributions from d and f orbitals are negligible and are omitted for simplicity. The percent contributions from each atom A ( $c_A^2 \times 100\%$ ) and B ( $c_B^2 \times 100\%$ ) to their shared NBO are also shown.

**Table S72.** Solvated NBO analysis<sup>a</sup> of (CF<sub>3</sub>L<sub>2</sub>)<sub>2</sub>Zn with the M06-2X functional.

| NBO <sup>b</sup>  | Occupancy <sup>c</sup> | Hybridization <sup>d</sup>               | Atomic Orbital Contributions (%) <sup>e</sup>                                |
|-------------------|------------------------|------------------------------------------|------------------------------------------------------------------------------|
| Lone pair 1 (N1)  | 1.84978                | $sp^{2.97}$                              | $s(25.17\%)p(74.81\%)$                                                       |
| Lone pair 2 (N1)  | 1.56655                | n/a                                      | $s(0.00\%)p(99.91\%)$                                                        |
| $\sigma(N1-C5)$   | 1.98488                | $sp^{1.76}$ at N1<br>$sp^{2.04}$ at C5   | N1 (59.06%): $s(36.13\%)p(63.61\%)$<br>C5 (40.94%): $s(32.90\%)p(67.01\%)$   |
| $\sigma(N1-C11)$  | 1.98507                | $sp^{1.59}$ at N1<br>$sp^{2.10}$ at C11  | N1 (58.74%): $s(38.57\%)p(61.18\%)$<br>C11 (41.26%): $s(32.20\%)p(67.71\%)$  |
| Lone pair 1 (N2)  | 1.91136                | $sp^{2.18}$                              | $s(31.36\%)p(68.45\%)$                                                       |
| $\sigma(N2-C5)$   | 1.98523                | $sp^{2.06}$ at N2<br>$sp^{1.89}$ at C5   | N2 (57.64%): $s(32.49\%)p(67.03\%)$<br>C5 (42.36%): $s(34.60\%)p(65.32\%)$   |
| $\sigma(N2-C6)$   | 1.98656                | $sp^{1.76}$ at N2<br>$sp^{2.01}$ at C6   | N2 (59.09%): $s(36.02\%)p(63.48\%)$<br>C6 (40.91%): $s(33.14\%)p(66.74\%)$   |
| $\pi(N2-C6)$      | 1.75212                | n/a                                      | N2 (65.38%): $s(0.00\%)p(99.63\%)$<br>C6 (34.62%): $s(0.00\%)p(99.84\%)$     |
| Lone pair 1 (N3)  | 1.90447                | $sp^{2.20}$                              | $s(31.19\%)p(68.65\%)$                                                       |
| $\sigma(N3-C5)$   | 1.98320                | $sp^{2.18}$ at N3<br>$sp^{2.08}$ at C5   | N3 (57.95%): $s(31.32\%)p(68.24\%)$<br>C5 (42.05%): $s(32.39\%)p(67.53\%)$   |
| $\sigma(N3-C7)$   | 1.98839                | $sp^{1.66}$ at N3<br>$sp^{1.99}$ at C7   | N3 (59.15%): $s(37.34\%)p(62.17\%)$<br>C7 (40.85%): $s(33.37\%)p(66.51\%)$   |
| $\pi(N3-C7)$      | 1.78784                | n/a                                      | N3 (64.86%): $s(0.00\%)p(99.66\%)$<br>C7 (35.14%): $s(0.00\%)p(99.83\%)$     |
| $\sigma(C6-C8)$   | 1.98844                | $sp^{1.87}$ at C8<br>$sp^{1.63}$ at C6   | C8 (50.43%): $s(34.78\%)p(65.02\%)$<br>C6 (49.57%): $s(38.00\%)p(61.84\%)$   |
| $\sigma(C7-C8)$   | 1.98750                | $sp^{1.90}$ at C8<br>$sp^{1.64}$ at C7   | C8 (50.28%): $s(34.36\%)p(65.45\%)$<br>C7 (49.72%): $s(37.76\%)p(62.08\%)$   |
| $\sigma(C11-C12)$ | 1.97746                | $sp^{1.73}$ at C11<br>$sp^{1.85}$ at C12 | C11 (51.01%): $s(36.61\%)p(63.28\%)$<br>C12 (48.99%): $s(34.99\%)p(64.83\%)$ |
| $\pi(C11-C12)$    | 1.65133                | n/a                                      | C11 (46.37%): $s(0.00\%)p(99.92\%)$<br>C12 (53.63%): $s(0.00\%)p(99.91\%)$   |
| $\sigma(C11-C10)$ | 1.97338                | $sp^{2.21}$ at C11<br>$sp^{1.97}$ at C10 | C11 (49.39%): $s(31.12\%)p(68.77\%)$<br>C10 (50.61%): $s(33.62\%)p(66.27\%)$ |
| Lone pair 1 (N4)  | 1.89290                | $sp^{2.73}$                              | $s(26.79\%)p(73.17\%)$                                                       |
| $\sigma(N4-C9)$   | 1.98800                | $sp^{1.56}$ at N4<br>$sp^{1.92}$ at C9   | N4 (59.87%): $s(38.95\%)p(60.67\%)$<br>C9 (40.13%): $s(34.20\%)p(65.68\%)$   |
| $\pi(N4-C9)$      | 1.85866                | n/a                                      | N4 (63.85%): $s(0.00\%)p(99.79\%)$<br>C9 (36.15%): $s(0.00\%)p(99.85\%)$     |
| $\sigma(N4-C10)$  | 1.98209                | $sp^{1.92}$ at N4<br>$sp^{2.28}$ at C10  | N4 (58.77%): $s(34.14\%)p(65.52\%)$<br>C10 (41.23%): $s(30.50\%)p(69.41\%)$  |

<sup>a</sup> Calculated in solution at the optimized S0 geometry using M06-2X (SMD “dichloromethane”/ def2-tzvp def2/j). The M06-2X functional uses 54 % Hartree-Fock exchange.<sup>23</sup>

<sup>b</sup> The general formulation of a sigma natural bond orbital (NBO) is  $\sigma_{AB} = c_A h_A + c_B h_B$ , where  $h_A$  and  $h_B$  are the atom-centered hybrid orbitals of atoms A and B, and  $c_A$  and  $c_B$  are the normalized polarization coefficients of atoms A and B. If the natural ionicity of an NBO, given by  $i_{AB} = \frac{(c_A^2 - c_B^2)}{(c_A^2 + c_B^2)}$ , exceeds a fixed limit ( $|i_{AB}| > 0.95$ ), this extremely polarized “bond” is identified instead as a lone pair.<sup>20</sup>

<sup>c</sup> Orbital occupancy ( $0 \leq x \leq 2$ ) is the number of electrons in the specified NBO. Lower orbital occupancy values are indicative of stronger delocalization.<sup>20</sup>

<sup>d</sup> Hybridization of a given NBO is of the form  $sp^\lambda$ , where  $\lambda = (\frac{\%p}{\%s})$ .<sup>20</sup> Hybridizations with a very high value of  $\lambda$  (for example,  $sp^\infty$ ) have been denoted as non-applicable.

<sup>e</sup> Atomic orbital contributions denote the percent contribution of s, p, d, and f orbitals from atom A, and the percent contribution of s, p, d, and f orbitals from atom B, to their shared NBO  $\sigma_{AB}$  or  $\pi_{AB}$ .<sup>20</sup> Contributions from d and f orbitals are negligible and are omitted for simplicity. The percent contributions from each atom A ( $c_A^2 \times 100\%$ ) and B ( $c_B^2 \times 100\%$ ) to their shared NBO are also shown.

**Table S73.** Solvated NBO analysis<sup>a</sup> of (CF<sub>3</sub>L2)<sub>2</sub>Zn with the CAM-B3LYP functional.

| NBO <sup>b</sup>  | Occupancy <sup>c</sup> | Hybridization <sup>d</sup>               | Atomic Orbital Contributions (%) <sup>e</sup>                                |
|-------------------|------------------------|------------------------------------------|------------------------------------------------------------------------------|
| Lone pair 1 (N1)  | 1.83300                | $sp^{3.01}$                              | $s(24.93\%)p(75.05\%)$                                                       |
| Lone pair 2 (N1)  | 1.57089                | n/a                                      | $s(0.00\%)p(99.92\%)$                                                        |
| $\sigma(N1-C5)$   | 1.98497                | $sp^{1.76}$ at N1<br>$sp^{2.03}$ at C5   | N1 (59.00%): $s(36.18\%)p(63.54\%)$<br>C5 (41.00%): $s(32.92\%)p(66.97\%)$   |
| $\sigma(N1-C11)$  | 1.98526                | $sp^{1.57}$ at N1<br>$sp^{2.10}$ at C11  | N1 (58.74%): $s(38.75\%)p(60.98\%)$<br>C11 (41.26%): $s(32.18\%)p(67.71\%)$  |
| Lone pair 1 (N2)  | 1.91037                | $sp^{2.22}$                              | $s(30.96\%)p(68.86\%)$                                                       |
| $\sigma(N2-C5)$   | 1.98532                | $sp^{2.04}$ at N2<br>$sp^{1.89}$ at C5   | N2 (57.62%): $s(32.69\%)p(66.82\%)$<br>C5 (42.38%): $s(34.54\%)p(65.35\%)$   |
| $\sigma(N2-C6)$   | 1.98668                | $sp^{1.75}$ at N2<br>$sp^{2.01}$ at C6   | N2 (58.99%): $s(36.23\%)p(63.25\%)$<br>C6 (41.01%): $s(33.14\%)p(66.72\%)$   |
| $\pi(N2-C6)$      | 1.75344                | n/a                                      | N2 (65.77%): $s(0.00\%)p(99.67\%)$<br>C6 (34.23%): $s(0.00\%)p(99.85\%)$     |
| Lone pair 1 (N3)  | 1.90294                | $sp^{2.22}$                              | $s(30.99\%)p(68.87\%)$                                                       |
| $\sigma(N3-C5)$   | 1.98335                | $sp^{2.17}$ at N3<br>$sp^{2.08}$ at C5   | N3 (57.86%): $s(31.42\%)p(68.12\%)$<br>C5 (42.14%): $s(32.40\%)p(67.50\%)$   |
| $\sigma(N3-C7)$   | 1.98838                | $sp^{1.66}$ at N3<br>$sp^{1.99}$ at C7   | N3 (59.03%): $s(37.44\%)p(62.06\%)$<br>C7 (40.97%): $s(33.38\%)p(66.48\%)$   |
| $\pi(N3-C7)$      | 1.78815                | n/a                                      | N3 (65.15%): $s(0.00\%)p(99.70\%)$<br>C7 (34.85%): $s(0.00\%)p(99.84\%)$     |
| $\sigma(C6-C8)$   | 1.98802                | $sp^{1.87}$ at C8<br>$sp^{1.62}$ at C6   | C8 (50.41%): $s(34.81\%)p(64.97\%)$<br>C6 (49.59%): $s(38.06\%)p(61.77\%)$   |
| $\sigma(C7-C8)$   | 1.98721                | $sp^{1.90}$ at C8<br>$sp^{1.64}$ at C7   | C8 (50.28%): $s(34.40\%)p(65.40\%)$<br>C7 (49.72%): $s(37.80\%)p(62.02\%)$   |
| $\sigma(C11-C12)$ | 1.97697                | $sp^{1.73}$ at C11<br>$sp^{1.85}$ at C12 | C11 (50.99%): $s(36.61\%)p(63.27\%)$<br>C12 (49.01%): $s(34.99\%)p(64.81\%)$ |
| $\pi(C11-C12)$    | 1.65180                | n/a                                      | C11 (46.27%): $s(0.00\%)p(99.91\%)$<br>C12 (53.73%): $s(0.00\%)p(99.91\%)$   |
| $\sigma(C11-C10)$ | 1.97332                | $sp^{2.21}$ at C11<br>$sp^{1.97}$ at C10 | C11 (49.42%): $s(31.13\%)p(68.75\%)$<br>C10 (50.58%): $s(33.62\%)p(66.25\%)$ |
| Lone pair 1 (N4)  | 1.88647                | $sp^{2.76}$                              | $s(26.59\%)p(73.38\%)$                                                       |
| $\sigma(N4-C9)$   | 1.98777                | $sp^{1.55}$ at N4<br>$sp^{1.92}$ at C9   | N4 (59.72%): $s(39.03\%)p(60.58\%)$<br>C9 (40.28%): $s(34.25\%)p(65.61\%)$   |
| $\pi(N4-C9)$      | 1.85990                | n/a                                      | N4 (64.03%): $s(0.00\%)p(99.81\%)$<br>C9 (35.97%): $s(0.00\%)p(99.85\%)$     |
| $\sigma(N4-C10)$  | 1.98221                | $sp^{1.91}$ at N4<br>$sp^{2.28}$ at C10  | N4 (58.69%): $s(34.25\%)p(65.39\%)$<br>C10 (41.31%): $s(30.48\%)p(69.41\%)$  |

<sup>a</sup> Calculated in solution at the optimized S0 geometry using CAM-B3LYP (SMD “dichloromethane”/ def2-tzvpp def2/j). The CAM-B3LYP functional is a range-separated functional, and uses 19 % Hartree-Fock exchange at short range, 33 % Hartree-Fock exchange at intermediate range, and 65 % Hartree-Fock exchange at long range.<sup>15</sup>

<sup>b</sup> The general formulation of a sigma natural bond orbital (NBO) is  $\sigma_{AB} = c_A h_A + c_B h_B$ , where  $h_A$  and  $h_B$  are the atom-centered hybrid orbitals of atoms A and B, and  $c_A$  and  $c_B$  are the normalized polarization coefficients of atoms A and B. If the natural ionicity of an NBO, given by  $i_{AB} = \frac{(c_A^2 - c_B^2)}{(c_A^2 + c_B^2)}$ , exceeds a fixed limit ( $|i_{AB}| > 0.95$ ), this extremely polarized “bond” is identified instead as a lone pair.<sup>20</sup>

<sup>c</sup> Orbital occupancy ( $0 \leq x \leq 2$ ) is the number of electrons in the specified NBO. Lower orbital occupancy values are indicative of stronger delocalization.<sup>20</sup>

<sup>d</sup> Hybridization of a given NBO is of the form  $sp^\lambda$ , where  $\lambda = (\frac{\%p}{\%s})$ .<sup>20</sup> Hybridizations with a very high value of  $\lambda$  (for example,  $sp^\infty$ ) have been denoted as non-applicable.

<sup>e</sup> Atomic orbital contributions denote the percent contribution of s, p, d, and f orbitals from atom A, and the percent contribution of s, p, d, and f orbitals from atom B, to their shared NBO  $\sigma_{AB}$  or  $\pi_{AB}$ .<sup>20</sup> Contributions from d and f orbitals are negligible and are omitted for simplicity. The percent contributions from each atom A ( $c_A^2 \times 100\%$ ) and B ( $c_B^2 \times 100\%$ ) to their shared NBO are also shown.

**Table S74.** NBO analysis<sup>a</sup> of (<sup>t</sup>BuL3)<sub>2</sub>Zn with the M06-L functional.

| NBO <sup>b</sup>  | Occupancy <sup>c</sup> | Hybridization <sup>d</sup>               | Atomic Orbital Contributions (%) <sup>e</sup>                                |
|-------------------|------------------------|------------------------------------------|------------------------------------------------------------------------------|
| Lone pair 1 (N1)  | 1.80939                | $sp^{2.18}$                              | $s(31.48\%)p(68.50\%)$                                                       |
| Lone pair 2 (N1)  | 1.60384                | n/a                                      | $s(0.07\%)p(99.88\%)$                                                        |
| $\sigma(N1-C5)$   | 1.98378                | $sp^{1.97}$ at N1<br>$sp^{2.23}$ at C5   | N1 (59.22%): $s(33.65\%)p(66.15\%)$<br>C5 (40.78%): $s(30.94\%)p(68.98\%)$   |
| $\sigma(N1-C11)$  | 1.98288                | $sp^{1.88}$ at N1<br>$sp^{2.08}$ at C11  | N1 (58.51%): $s(34.68\%)p(65.09\%)$<br>C11 (41.49%): $s(32.41\%)p(67.50\%)$  |
| $\sigma(C2-C5)$   | 1.97772                | $sp^{1.84}$ at C2<br>$sp^{1.87}$ at C5   | C2 (49.60%): $s(35.10\%)p(64.73\%)$<br>C5 (50.40%): $s(34.76\%)p(65.13\%)$   |
| $\sigma(C2-C6)$   | 1.98213                | $sp^{1.74}$ at C2<br>$sp^{1.75}$ at C6   | C2 (50.23%): $s(36.50\%)p(63.33\%)$<br>C6 (49.77%): $s(36.25\%)p(63.60\%)$   |
| $\pi(C2-C6)$      | 1.70484                | n/a                                      | C2 (52.02%): $s(0.01\%)p(99.92\%)$<br>C6 (47.98%): $s(0.00\%)p(99.92\%)$     |
| $\sigma(C3-C5)$   | 1.97754                | $sp^{1.83}$ at C3<br>$sp^{1.93}$ at C5   | C3 (49.45%): $s(35.32\%)p(64.50\%)$<br>C5 (50.55%): $s(34.20\%)p(65.86\%)$   |
| $\pi(C3-C5)$      | 1.62648                | n/a                                      | C3 (52.77%): $s(0.00\%)p(99.92\%)$<br>C5 (47.23%): $s(0.01\%)p(99.91\%)$     |
| $\sigma(C3-C7)$   | 1.98321                | $sp^{1.74}$ at C3<br>$sp^{1.77}$ at C7   | C3 (50.25%): $s(36.43\%)p(63.39\%)$<br>C7 (49.75%): $s(36.08\%)p(63.76\%)$   |
| $\sigma(C6-C8)$   | 1.98417                | $sp^{1.77}$ at C6<br>$sp^{1.79}$ at C8   | C6 (50.15%): $s(36.01\%)p(63.82\%)$<br>C8 (49.85%): $s(35.73\%)p(64.11\%)$   |
| $\sigma(C7-C8)$   | 1.98402                | $sp^{1.77}$ at C7<br>$sp^{1.79}$ at C8   | C7 (50.10%): $s(36.02\%)p(63.81\%)$<br>C8 (49.90%): $s(35.74\%)p(64.10\%)$   |
| $\pi(C7-C8)$      | 1.67304                | n/a                                      | C7 (48.16%): $s(0.00\%)p(99.92\%)$<br>C8 (51.84%): $s(0.00\%)p(99.92\%)$     |
| $\sigma(C11-C12)$ | 1.97698                | $sp^{1.75}$ at C11<br>$sp^{1.87}$ at C12 | C11 (50.94%): $s(36.30\%)p(63.59\%)$<br>C12 (49.06%): $s(34.76\%)p(65.06\%)$ |
| $\pi(C11-C12)$    | 1.63613                | n/a                                      | C11 (44.36%): $s(0.00\%)p(99.90\%)$<br>C12 (55.64%): $s(0.01\%)p(99.90\%)$   |
| $\sigma(C11-C10)$ | 1.97095                | $sp^{2.20}$ at C11<br>$sp^{1.94}$ at C10 | C11 (49.09%): $s(31.21\%)p(68.66\%)$<br>C10 (50.91%): $s(34.01\%)p(65.87\%)$ |
| Lone pair 1 (N4)  | 1.86702                | $sp^{2.43}$                              | $s(29.12\%)p(70.86\%)$                                                       |
| $\sigma(N4-C9)$   | 1.98844                | $sp^{1.66}$ at N4<br>$sp^{1.94}$ at C9   | N4 (59.97%): $s(37.45\%)p(62.24\%)$<br>C9 (40.03%): $s(34.02\%)p(65.89\%)$   |
| $\pi(N4-C9)$      | 1.86261                | n/a                                      | N4 (62.68%): $s(0.00\%)p(99.86\%)$<br>C9 (37.32%): $s(0.00\%)p(99.87\%)$     |
| $\sigma(N4-C10)$  | 1.98149                | $sp^{1.99}$ at N4<br>$sp^{2.34}$ at C10  | N4 (59.48%): $s(33.31\%)p(66.42\%)$<br>C10 (40.52%): $s(29.90\%)p(70.03\%)$  |

<sup>a</sup> Calculated in gas phase at the optimized S0 geometry using M06-L (gas phase/ def2-tzvpp def2/j). The M06-L functional uses 0 % Hartree-Fock exchange.<sup>19</sup>

<sup>b</sup> The general formulation of a sigma natural bond orbital (NBO) is  $\sigma_{AB} = c_A h_A + c_B h_B$ , where  $h_A$  and  $h_B$  are the atom-centered hybrid orbitals of atoms A and B, and  $c_A$  and  $c_B$  are the normalized polarization coefficients of atoms A and B. If the natural ionicity of an NBO, given by  $i_{AB} = \frac{(c_A^2 - c_B^2)}{(c_A^2 + c_B^2)}$ , exceeds a fixed limit ( $|i_{AB}| > 0.95$ ), this extremely polarized “bond” is identified instead as a lone pair.<sup>20</sup>

<sup>c</sup> Orbital occupancy ( $0 \leq x \leq 2$ ) is the number of electrons in the specified NBO. Lower orbital occupancy values are indicative of stronger delocalization.<sup>20</sup>

<sup>d</sup> Hybridization of a given NBO is of the form  $sp^\lambda$ , where  $\lambda = \left(\frac{\%p}{\%s}\right)$ .<sup>20</sup> Hybridizations with a very high value of  $\lambda$  (for example,  $sp^\infty$ ) have been denoted as non-applicable.

<sup>e</sup> Atomic orbital contributions denote the percent contribution of s, p, d, and f orbitals from atom A, and the percent contribution of s, p, d, and f orbitals from atom B, to their shared NBO  $\sigma_{AB}$  or  $\pi_{AB}$ .<sup>20</sup> Contributions from d and f orbitals are negligible and are omitted for simplicity. The percent contributions from each atom A ( $c_A^2 \times 100\%$ ) and B ( $c_B^2 \times 100\%$ ) to their shared NBO are also shown.

**Table S75.** NBO analysis<sup>a</sup> of (<sup>t</sup>BuL3)<sub>2</sub>Zn with the TPSSh functional.

| NBO <sup>b</sup>  | Occupancy <sup>c</sup> | Hybridization <sup>d</sup>               | Atomic Orbital Contributions (%) <sup>e</sup>                                |
|-------------------|------------------------|------------------------------------------|------------------------------------------------------------------------------|
| Lone pair 1 (N1)  | 1.80893                | $sp^{2.37}$                              | $s(29.70\%)p(70.27\%)$                                                       |
| Lone pair 2 (N1)  | 1.61047                | n/a                                      | $s(0.07\%)p(99.88\%)$                                                        |
| $\sigma(N1-C5)$   | 1.98428                | $sp^{1.89}$ at N1<br>$sp^{2.22}$ at C5   | N1 (59.00%): $s(34.50\%)p(65.28\%)$<br>C5 (41.00%): $s(31.02\%)p(68.88\%)$   |
| $\sigma(N1-C11)$  | 1.98325                | $sp^{1.80}$ at N1<br>$sp^{2.08}$ at C11  | N1 (58.25%): $s(35.61\%)p(64.15\%)$<br>C11 (41.75%): $s(32.48\%)p(67.41\%)$  |
| $\sigma(C2-C5)$   | 1.97775                | $sp^{1.86}$ at C2<br>$sp^{1.87}$ at C5   | C2 (49.47%): $s(34.94\%)p(64.88\%)$<br>C5 (50.53%): $s(34.76\%)p(65.13\%)$   |
| $\sigma(C2-C6)$   | 1.98200                | $sp^{1.74}$ at C2<br>$sp^{1.76}$ at C6   | C2 (50.24%): $s(36.40\%)p(63.42\%)$<br>C6 (49.76%): $s(36.11\%)p(63.72\%)$   |
| $\pi(C2-C6)$      | 1.70324                | n/a                                      | C2 (51.83%): $s(0.01\%)p(99.92\%)$<br>C6 (48.17%): $s(0.00\%)p(99.93\%)$     |
| $\sigma(C3-C5)$   | 1.97766                | $sp^{1.84}$ at C3<br>$sp^{1.93}$ at C5   | C3 (49.30%): $s(35.18\%)p(64.64\%)$<br>C5 (50.70%): $s(34.12\%)p(65.77\%)$   |
| $\pi(C3-C5)$      | 1.62719                | n/a                                      | C3 (52.29%): $s(0.00\%)p(99.93\%)$<br>C5 (47.71%): $s(0.02\%)p(99.91\%)$     |
| $\sigma(C3-C7)$   | 1.98307                | $sp^{1.75}$ at C3<br>$sp^{1.78}$ at C7   | C3 (50.27%): $s(36.31\%)p(63.51\%)$<br>C7 (49.73%): $s(35.93\%)p(63.90\%)$   |
| $\sigma(C6-C8)$   | 1.98432                | $sp^{1.78}$ at C6<br>$sp^{1.80}$ at C8   | C6 (50.14%): $s(35.88\%)p(63.94\%)$<br>C8 (49.86%): $s(35.61\%)p(64.21\%)$   |
| $\sigma(C7-C8)$   | 1.98364                | $sp^{1.78}$ at C7<br>$sp^{1.80}$ at C8   | C7 (50.08%): $s(35.96\%)p(63.86\%)$<br>C8 (49.92%): $s(35.70\%)p(64.12\%)$   |
| $\pi(C7-C8)$      | 1.67297                | n/a                                      | C7 (48.20%): $s(0.00\%)p(99.93\%)$<br>C8 (51.80%): $s(0.00\%)p(99.93\%)$     |
| $\sigma(C11-C12)$ | 1.97605                | $sp^{1.75}$ at C11<br>$sp^{1.88}$ at C12 | C11 (51.10%): $s(36.35\%)p(63.54\%)$<br>C12 (48.90%): $s(34.66\%)p(65.15\%)$ |
| $\pi(C11-C12)$    | 1.63577                | n/a                                      | C11 (44.82%): $s(0.00\%)p(99.91\%)$<br>C12 (55.18%): $s(0.01\%)p(99.91\%)$   |
| $\sigma(C11-C10)$ | 1.97063                | $sp^{2.22}$ at C11<br>$sp^{1.94}$ at C10 | C11 (49.08%): $s(31.00\%)p(68.88\%)$<br>C10 (50.92%): $s(33.96\%)p(65.93\%)$ |
| Lone pair 1 (N4)  | 1.86723                | $sp^{2.58}$                              | $s(27.91\%)p(72.07\%)$                                                       |
| $\sigma(N4-C9)$   | 1.98843                | $sp^{1.60}$ at N4<br>$sp^{1.93}$ at C9   | N4 (59.91%): $s(38.40\%)p(61.25\%)$<br>C9 (40.09%): $s(34.11\%)p(65.77\%)$   |
| $\pi(N4-C9)$      | 1.86265                | n/a                                      | N4 (62.80%): $s(0.00\%)p(99.87\%)$<br>C9 (37.20%): $s(0.00\%)p(99.88\%)$     |
| $\sigma(N4-C10)$  | 1.98196                | $sp^{1.92}$ at N4<br>$sp^{2.33}$ at C10  | N4 (59.27%): $s(34.14\%)p(65.56\%)$<br>C10 (40.73%): $s(29.98\%)p(69.92\%)$  |

<sup>a</sup> Calculated in gas phase at the optimized S0 geometry using TPSSh (gas phase/ def2-tzvpp def2/j). The TPSSh functional uses 10 % Hartree-Fock exchange.<sup>11</sup>

<sup>b</sup> The general formulation of a sigma natural bond orbital (NBO) is  $\sigma_{AB} = c_A h_A + c_B h_B$ , where  $h_A$  and  $h_B$  are the atom-centered hybrid orbitals of atoms A and B, and  $c_A$  and  $c_B$  are the normalized polarization coefficients of atoms A and B. If the natural ionicity of an NBO, given by  $i_{AB} = \frac{(c_A^2 - c_B^2)}{(c_A^2 + c_B^2)}$ , exceeds a fixed limit ( $|i_{AB}| > 0.95$ ), this extremely polarized “bond” is identified instead as a lone pair.<sup>20</sup>

<sup>c</sup> Orbital occupancy ( $0 \leq x \leq 2$ ) is the number of electrons in the specified NBO. Lower orbital occupancy values are indicative of stronger delocalization.<sup>20</sup>

<sup>d</sup> Hybridization of a given NBO is of the form  $sp^\lambda$ , where  $\lambda = \left(\frac{\%p}{\%s}\right)$ .<sup>20</sup> Hybridizations with a very high value of  $\lambda$  (for example,  $sp^\infty$ ) have been denoted as non-applicable.

<sup>e</sup> Atomic orbital contributions denote the percent contribution of s, p, d, and f orbitals from atom A, and the percent contribution of s, p, d, and f orbitals from atom B, to their shared NBO  $\sigma_{AB}$  or  $\pi_{AB}$ .<sup>20</sup> Contributions from d and f orbitals are negligible and are omitted for simplicity. The percent contributions from each atom A ( $c_A^2 \times 100\%$ ) and B ( $c_B^2 \times 100\%$ ) to their shared NBO are also shown.

**Table S76.** NBO analysis<sup>a</sup> of (<sup>t</sup>BuL3)<sub>2</sub>Zn with the O3LYP functional.

| NBO <sup>b</sup>  | Occupancy <sup>c</sup> | Hybridization <sup>d</sup>               | Atomic Orbital Contributions (%) <sup>e</sup>                                |
|-------------------|------------------------|------------------------------------------|------------------------------------------------------------------------------|
| Lone pair 1 (N1)  | 1.80815                | $sp^{2.40}$                              | $s(29.41\%)p(70.56\%)$                                                       |
| Lone pair 2 (N1)  | 1.60716                | n/a                                      | $s(0.06\%)p(99.89\%)$                                                        |
| $\sigma(N1-C5)$   | 1.98429                | $sp^{1.88}$ at N1<br>$sp^{2.22}$ at C5   | N1 (58.85%): $s(34.65\%)p(65.14\%)$<br>C5 (41.15%): $s(31.06\%)p(68.84\%)$   |
| $\sigma(N1-C11)$  | 1.98316                | $sp^{1.79}$ at N1<br>$sp^{2.07}$ at C11  | N1 (58.13%): $s(35.74\%)p(64.01\%)$<br>C11 (41.87%): $s(32.53\%)p(67.36\%)$  |
| $\sigma(C2-C5)$   | 1.97733                | $sp^{1.86}$ at C2<br>$sp^{1.87}$ at C5   | C2 (49.47%): $s(34.90\%)p(64.93\%)$<br>C5 (50.53%): $s(34.77\%)p(65.13\%)$   |
| $\sigma(C2-C6)$   | 1.98150                | $sp^{1.74}$ at C2<br>$sp^{1.77}$ at C6   | C2 (50.23%): $s(36.38\%)p(63.45\%)$<br>C6 (49.77%): $s(36.09\%)p(63.75\%)$   |
| $\pi(C2-C6)$      | 1.70356                | n/a                                      | C2 (51.77%): $s(0.01\%)p(99.93\%)$<br>C6 (48.23%): $s(0.00\%)p(99.93\%)$     |
| $\sigma(C3-C5)$   | 1.97717                | $sp^{1.84}$ at C3<br>$sp^{1.93}$ at C5   | C3 (49.31%): $s(35.15\%)p(64.69\%)$<br>C5 (50.69%): $s(34.07\%)p(65.82\%)$   |
| $\pi(C3-C5)$      | 1.62685                | n/a                                      | C3 (52.28%): $s(0.00\%)p(99.93\%)$<br>C5 (47.72%): $s(0.02\%)p(99.92\%)$     |
| $\sigma(C3-C7)$   | 1.98256                | $sp^{1.75}$ at C3<br>$sp^{1.78}$ at C7   | C3 (50.27%): $s(36.30\%)p(63.53\%)$<br>C7 (49.73%): $s(35.90\%)p(63.94\%)$   |
| $\sigma(C6-C8)$   | 1.98374                | $sp^{1.78}$ at C6<br>$sp^{1.81}$ at C8   | C6 (50.14%): $s(35.87\%)p(63.96\%)$<br>C8 (49.86%): $s(35.59\%)p(64.24\%)$   |
| $\sigma(C7-C8)$   | 1.98360                | $sp^{1.78}$ at C7<br>$sp^{1.80}$ at C8   | C7 (50.08%): $s(35.88\%)p(63.96\%)$<br>C8 (49.92%): $s(35.61\%)p(64.23\%)$   |
| $\pi(C7-C8)$      | 1.67379                | n/a                                      | C7 (48.30%): $s(0.00\%)p(99.94\%)$<br>C8 (51.70%): $s(0.00\%)p(99.94\%)$     |
| $\sigma(C11-C12)$ | 1.97605                | $sp^{1.75}$ at C11<br>$sp^{1.89}$ at C12 | C11 (51.08%): $s(36.34\%)p(63.56\%)$<br>C12 (48.92%): $s(34.58\%)p(65.25\%)$ |
| $\pi(C11-C12)$    | 1.63506                | n/a                                      | C11 (45.02%): $s(0.00\%)p(99.92\%)$<br>C12 (54.98%): $s(0.01\%)p(99.92\%)$   |
| $\sigma(C11-C10)$ | 1.97062                | $sp^{2.22}$ at C11<br>$sp^{1.95}$ at C10 | C11 (49.11%): $s(31.06\%)p(68.83\%)$<br>C10 (50.89%): $s(33.90\%)p(66.00\%)$ |
| Lone pair 1 (N4)  | 1.86538                | $sp^{2.60}$                              | $s(27.77\%)p(72.22\%)$                                                       |
| $\sigma(N4-C9)$   | 1.98834                | $sp^{1.61}$ at N4<br>$sp^{1.94}$ at C9   | N4 (59.76%): $s(38.13\%)p(61.54\%)$<br>C9 (40.24%): $s(34.01\%)p(65.88\%)$   |
| $\pi(N4-C9)$      | 1.86369                | n/a                                      | N4 (62.78%): $s(0.00\%)p(99.87\%)$<br>C9 (37.22%): $s(0.00\%)p(99.88\%)$     |
| $\sigma(N4-C10)$  | 1.98204                | $sp^{1.93}$ at N4<br>$sp^{2.32}$ at C10  | N4 (59.10%): $s(33.98\%)p(65.72\%)$<br>C10 (40.90%): $s(30.06\%)p(69.85\%)$  |

<sup>a</sup> Calculated in gas phase at the optimized S0 geometry using O3LYP (gas phase/ def2-tzvpp def2/j). The O3LYP functional uses 11.61 % Hartree-Fock exchange.<sup>21</sup>

<sup>b</sup> The general formulation of a sigma natural bond orbital (NBO) is  $\sigma_{AB} = c_A h_A + c_B h_B$ , where  $h_A$  and  $h_B$  are the atom-centered hybrid orbitals of atoms A and B, and  $c_A$  and  $c_B$  are the normalized polarization coefficients of atoms A and B. If the natural ionicity of an NBO, given by  $i_{AB} = \frac{(c_A^2 - c_B^2)}{(c_A^2 + c_B^2)}$ , exceeds a fixed limit ( $|i_{AB}| > 0.95$ ), this extremely polarized “bond” is identified instead as a lone pair.<sup>20</sup>

<sup>c</sup> Orbital occupancy ( $0 \leq x \leq 2$ ) is the number of electrons in the specified NBO. Lower orbital occupancy values are indicative of stronger delocalization.<sup>20</sup>

<sup>d</sup> Hybridization of a given NBO is of the form  $sp^\lambda$ , where  $\lambda = \left(\frac{\%p}{\%s}\right)$ .<sup>20</sup> Hybridizations with a very high value of  $\lambda$  (for example,  $sp^\infty$ ) have been denoted as non-applicable.

<sup>e</sup> Atomic orbital contributions denote the percent contribution of s, p, d, and f orbitals from atom A, and the percent contribution of s, p, d, and f orbitals from atom B, to their shared NBO  $\sigma_{AB}$  or  $\pi_{AB}$ .<sup>20</sup> Contributions from d and f orbitals are negligible and are omitted for simplicity. The percent contributions from each atom A ( $c_A^2 \times 100\%$ ) and B ( $c_B^2 \times 100\%$ ) to their shared NBO are also shown.

**Table S77.** NBO analysis<sup>a</sup> of (<sup>t</sup>BuL3)<sub>2</sub>Zn with the B3LYP functional.

| NBO <sup>b</sup>  | Occupancy <sup>c</sup> | Hybridization <sup>d</sup>               | Atomic Orbital Contributions (%) <sup>e</sup>                                |
|-------------------|------------------------|------------------------------------------|------------------------------------------------------------------------------|
| Lone pair 1 (N1)  | 1.81183                | $sp^{2.44}$                              | $s(29.08\%)p(70.89\%)$                                                       |
| Lone pair 2 (N1)  | 1.62131                | n/a                                      | $s(0.07\%)p(99.88\%)$                                                        |
| $\sigma(N1-C5)$   | 1.98457                | $sp^{1.86}$ at N1<br>$sp^{2.21}$ at C5   | N1 (58.94%): $s(34.83\%)p(64.94\%)$<br>C5 (41.06%): $s(31.09\%)p(68.80\%)$   |
| $\sigma(N1-C11)$  | 1.98343                | $sp^{1.78}$ at N1<br>$sp^{2.07}$ at C11  | N1 (58.22%): $s(35.90\%)p(63.84\%)$<br>C11 (41.78%): $s(32.55\%)p(67.33\%)$  |
| $\sigma(C2-C5)$   | 1.97752                | $sp^{1.85}$ at C2<br>$sp^{1.88}$ at C5   | C2 (49.50%): $s(34.96\%)p(64.85\%)$<br>C5 (50.50%): $s(34.72\%)p(65.16\%)$   |
| $\sigma(C2-C6)$   | 1.98185                | $sp^{1.74}$ at C2<br>$sp^{1.76}$ at C6   | C2 (50.23%): $s(36.43\%)p(63.38\%)$<br>C6 (49.77%): $s(36.13\%)p(63.69\%)$   |
| $\pi(C2-C6)$      | 1.70328                | n/a                                      | C2 (51.94%): $s(0.01\%)p(99.93\%)$<br>C6 (48.06%): $s(0.00\%)p(99.93\%)$     |
| $\sigma(C3-C5)$   | 1.97750                | $sp^{1.84}$ at C3<br>$sp^{1.93}$ at C5   | C3 (49.33%): $s(35.20\%)p(64.60\%)$<br>C5 (50.67%): $s(34.06\%)p(65.82\%)$   |
| $\pi(C3-C5)$      | 1.62671                | n/a                                      | C3 (52.66%): $s(0.00\%)p(99.93\%)$<br>C5 (47.34%): $s(0.02\%)p(99.91\%)$     |
| $\sigma(C3-C7)$   | 1.98284                | $sp^{1.75}$ at C3<br>$sp^{1.78}$ at C7   | C3 (50.25%): $s(36.34\%)p(63.47\%)$<br>C7 (49.75%): $s(35.96\%)p(63.86\%)$   |
| $\sigma(C6-C8)$   | 1.98384                | $sp^{1.78}$ at C6<br>$sp^{1.80}$ at C8   | C6 (50.14%): $s(35.91\%)p(63.90\%)$<br>C8 (49.86%): $s(35.64\%)p(64.18\%)$   |
| $\sigma(C7-C8)$   | 1.98371                | $sp^{1.78}$ at C7<br>$sp^{1.80}$ at C8   | C7 (50.08%): $s(35.92\%)p(63.89\%)$<br>C8 (49.92%): $s(35.65\%)p(64.17\%)$   |
| $\pi(C7-C8)$      | 1.67455                | n/a                                      | C7 (48.13%): $s(0.00\%)p(99.94\%)$<br>C8 (51.87%): $s(0.00\%)p(99.94\%)$     |
| $\sigma(C11-C12)$ | 1.97634                | $sp^{1.75}$ at C11<br>$sp^{1.88}$ at C12 | C11 (51.07%): $s(36.31\%)p(63.58\%)$<br>C12 (48.93%): $s(34.64\%)p(65.16\%)$ |
| $\pi(C11-C12)$    | 1.63757                | n/a                                      | C11 (44.36%): $s(0.00\%)p(99.91\%)$<br>C12 (55.64%): $s(0.00\%)p(99.92\%)$   |
| $\sigma(C11-C10)$ | 1.97118                | $sp^{2.22}$ at C11<br>$sp^{1.95}$ at C10 | C11 (49.06%): $s(31.04\%)p(68.83\%)$<br>C10 (50.94%): $s(33.91\%)p(65.97\%)$ |
| Lone pair 1 (N4)  | 1.87037                | $sp^{2.66}$                              | $s(27.31\%)p(72.68\%)$                                                       |
| $\sigma(N4-C9)$   | 1.98827                | $sp^{1.60}$ at N4<br>$sp^{1.93}$ at C9   | N4 (59.84%): $s(38.33\%)p(61.32\%)$<br>C9 (40.16%): $s(34.06\%)p(65.81\%)$   |
| $\pi(N4-C9)$      | 1.86588                | n/a                                      | N4 (62.85%): $s(0.00\%)p(99.87\%)$<br>C9 (37.15%): $s(0.00\%)p(99.88\%)$     |
| $\sigma(N4-C10)$  | 1.98226                | $sp^{1.91}$ at N4<br>$sp^{2.32}$ at C10  | N4 (59.27%): $s(34.24\%)p(65.44\%)$<br>C10 (40.73%): $s(30.05\%)p(69.85\%)$  |

<sup>a</sup> Calculated in gas phase at the optimized S0 geometry using B3LYP (gas phase/ def2-tzvpp def2/j). The B3LYP functional uses 20 % Hartree-Fock exchange.<sup>22</sup>

<sup>b</sup> The general formulation of a sigma natural bond orbital (NBO) is  $\sigma_{AB} = c_A h_A + c_B h_B$ , where  $h_A$  and  $h_B$  are the atom-centered hybrid orbitals of atoms A and B, and  $c_A$  and  $c_B$  are the normalized polarization coefficients of atoms A and B. If the natural ionicity of an NBO, given by  $i_{AB} = \frac{(c_A^2 - c_B^2)}{(c_A^2 + c_B^2)}$ , exceeds a fixed limit ( $|i_{AB}| > 0.95$ ), this extremely polarized “bond” is identified instead as a lone pair.<sup>20</sup>

<sup>c</sup> Orbital occupancy ( $0 \leq x \leq 2$ ) is the number of electrons in the specified NBO. Lower orbital occupancy values are indicative of stronger delocalization.<sup>20</sup>

<sup>d</sup> Hybridization of a given NBO is of the form  $sp^\lambda$ , where  $\lambda = \left(\frac{\%p}{\%s}\right)$ .<sup>20</sup> Hybridizations with a very high value of  $\lambda$  (for example,  $sp^\infty$ ) have been denoted as non-applicable.

<sup>e</sup> Atomic orbital contributions denote the percent contribution of s, p, d, and f orbitals from atom A, and the percent contribution of s, p, d, and f orbitals from atom B, to their shared NBO  $\sigma_{AB}$  or  $\pi_{AB}$ .<sup>20</sup> Contributions from d and f orbitals are negligible and are omitted for simplicity. The percent contributions from each atom A ( $c_A^2 \times 100\%$ ) and B ( $c_B^2 \times 100\%$ ) to their shared NBO are also shown.

**Table S78.** NBO analysis<sup>a</sup> of (<sup>t</sup>BuL3)<sub>2</sub>Zn with the PBE0 functional.

| NBO <sup>b</sup>  | Occupancy <sup>c</sup> | Hybridization <sup>d</sup>               | Atomic Orbital Contributions (%) <sup>e</sup>                                |
|-------------------|------------------------|------------------------------------------|------------------------------------------------------------------------------|
| Lone pair 1 (N1)  | 1.81558                | $sp^{2.44}$                              | $s(29.03\%)p(70.94\%)$                                                       |
| Lone pair 2 (N1)  | 1.62561                | n/a                                      | $s(0.07\%)p(99.88\%)$                                                        |
| $\sigma(N1-C5)$   | 1.98475                | $sp^{1.86}$ at N1<br>$sp^{2.21}$ at C5   | N1 (58.90%): $s(34.87\%)p(64.90\%)$<br>C5 (41.10%): $s(31.09\%)p(68.80\%)$   |
| $\sigma(N1-C11)$  | 1.98357                | $sp^{1.78}$ at N1<br>$sp^{2.07}$ at C11  | N1 (58.16%): $s(35.91\%)p(63.83\%)$<br>C11 (41.84%): $s(32.56\%)p(67.33\%)$  |
| $\sigma(C2-C5)$   | 1.97780                | $sp^{1.86}$ at C2<br>$sp^{1.88}$ at C5   | C2 (49.53%): $s(34.94\%)p(64.88\%)$<br>C5 (50.47%): $s(34.73\%)p(65.16\%)$   |
| $\sigma(C2-C6)$   | 1.98194                | $sp^{1.74}$ at C2<br>$sp^{1.77}$ at C6   | C2 (50.24%): $s(36.37\%)p(63.45\%)$<br>C6 (49.76%): $s(36.10\%)p(63.73\%)$   |
| $\pi(C2-C6)$      | 1.70297                | n/a                                      | C2 (51.98%): $s(0.01\%)p(99.93\%)$<br>C6 (48.02%): $s(0.00\%)p(99.93\%)$     |
| $\sigma(C3-C5)$   | 1.97776                | $sp^{1.84}$ at C3<br>$sp^{1.93}$ at C5   | C3 (49.35%): $s(35.18\%)p(64.63\%)$<br>C5 (50.65%): $s(34.06\%)p(65.82\%)$   |
| $\pi(C3-C5)$      | 1.62719                | n/a                                      | C3 (52.67%): $s(0.00\%)p(99.93\%)$<br>C5 (47.33%): $s(0.02\%)p(99.91\%)$     |
| $\sigma(C3-C7)$   | 1.98296                | $sp^{1.75}$ at C3<br>$sp^{1.78}$ at C7   | C3 (50.27%): $s(36.29\%)p(63.53\%)$<br>C7 (49.73%): $s(35.92\%)p(63.91\%)$   |
| $\sigma(C6-C8)$   | 1.98407                | $sp^{1.78}$ at C6<br>$sp^{1.80}$ at C8   | C6 (50.14%): $s(35.86\%)p(63.96\%)$<br>C8 (49.86%): $s(35.59\%)p(64.23\%)$   |
| $\sigma(C7-C8)$   | 1.98394                | $sp^{1.78}$ at C7<br>$sp^{1.80}$ at C8   | C7 (50.07%): $s(35.87\%)p(63.95\%)$<br>C8 (49.93%): $s(35.60\%)p(64.22\%)$   |
| $\pi(C7-C8)$      | 1.67432                | n/a                                      | C7 (48.10%): $s(0.00\%)p(99.93\%)$<br>C8 (51.90%): $s(0.00\%)p(99.94\%)$     |
| $\sigma(C11-C12)$ | 1.97648                | $sp^{1.75}$ at C11<br>$sp^{1.88}$ at C12 | C11 (51.04%): $s(36.33\%)p(63.56\%)$<br>C12 (48.96%): $s(34.60\%)p(65.20\%)$ |
| $\pi(C11-C12)$    | 1.63888                | n/a                                      | C11 (44.30%): $s(0.00\%)p(99.91\%)$<br>C12 (55.70%): $s(0.01\%)p(99.91\%)$   |
| $\sigma(C11-C10)$ | 1.97135                | $sp^{2.22}$ at C11<br>$sp^{1.94}$ at C10 | C11 (49.03%): $s(31.03\%)p(68.85\%)$<br>C10 (50.97%): $s(33.93\%)p(65.95\%)$ |
| Lone pair 1 (N4)  | 1.87229                | $sp^{2.64}$                              | $s(27.45\%)p(72.53\%)$                                                       |
| $\sigma(N4-C9)$   | 1.98850                | $sp^{1.61}$ at N4<br>$sp^{1.93}$ at C9   | N4 (59.78%): $s(38.23\%)p(61.41\%)$<br>C9 (40.22%): $s(34.05\%)p(65.83\%)$   |
| $\pi(N4-C9)$      | 1.86650                | n/a                                      | N4 (62.98%): $s(0.00\%)p(99.86\%)$<br>C9 (37.02%): $s(0.00\%)p(99.87\%)$     |
| $\sigma(N4-C10)$  | 1.98243                | $sp^{1.92}$ at N4<br>$sp^{2.33}$ at C10  | N4 (59.17%): $s(34.19\%)p(65.49\%)$<br>C10 (40.83%): $s(30.03\%)p(69.87\%)$  |

<sup>a</sup> Calculated in gas phase at the optimized S0 geometry using PBE0 (gas phase/ def2-tzvpp def2/j). The PBE0 functional uses 25 % Hartree-Fock exchange.<sup>14</sup>

<sup>b</sup> The general formulation of a sigma natural bond orbital (NBO) is  $\sigma_{AB} = c_A h_A + c_B h_B$ , where  $h_A$  and  $h_B$  are the atom-centered hybrid orbitals of atoms A and B, and  $c_A$  and  $c_B$  are the normalized polarization coefficients of atoms A and B. If the natural ionicity of an NBO, given by  $i_{AB} = \frac{(c_A^2 - c_B^2)}{(c_A^2 + c_B^2)}$ , exceeds a fixed limit ( $|i_{AB}| > 0.95$ ), this extremely polarized “bond” is identified instead as a lone pair.<sup>20</sup>

<sup>c</sup> Orbital occupancy ( $0 \leq x \leq 2$ ) is the number of electrons in the specified NBO. Lower orbital occupancy values are indicative of stronger delocalization.<sup>20</sup>

<sup>d</sup> Hybridization of a given NBO is of the form  $sp^\lambda$ , where  $\lambda = \left(\frac{\%p}{\%s}\right)$ .<sup>20</sup> Hybridizations with a very high value of  $\lambda$  (for example,  $sp^\infty$ ) have been denoted as non-applicable.

<sup>e</sup> Atomic orbital contributions denote the percent contribution of s, p, d, and f orbitals from atom A, and the percent contribution of s, p, d, and f orbitals from atom B, to their shared NBO  $\sigma_{AB}$  or  $\pi_{AB}$ .<sup>20</sup> Contributions from d and f orbitals are negligible and are omitted for simplicity. The percent contributions from each atom A ( $c_A^2 \times 100\%$ ) and B ( $c_B^2 \times 100\%$ ) to their shared NBO are also shown.

**Table S79.** NBO analysis<sup>a</sup> of (<sup>t</sup>BuL3)<sub>2</sub>Zn with the M06 functional.

| NBO <sup>b</sup>  | Occupancy <sup>c</sup> | Hybridization <sup>d</sup>               | Atomic Orbital Contributions (%) <sup>e</sup>                                |
|-------------------|------------------------|------------------------------------------|------------------------------------------------------------------------------|
| Lone pair 1 (N1)  | 1.80780                | $sp^{2.42}$                              | $s(29.26\%)p(70.72\%)$                                                       |
| Lone pair 2 (N1)  | 1.63460                | n/a                                      | $s(0.08\%)p(99.85\%)$                                                        |
| $\sigma(N1-C5)$   | 1.98440                | $sp^{1.87}$ at N1<br>$sp^{2.22}$ at C5   | N1 (59.23%): $s(34.80\%)p(65.01\%)$<br>C5 (40.77%): $s(31.06\%)p(68.85\%)$   |
| $\sigma(N1-C11)$  | 1.98333                | $sp^{1.79}$ at N1<br>$sp^{2.07}$ at C11  | N1 (58.43%): $s(35.75\%)p(64.04\%)$<br>C11 (41.57%): $s(32.52\%)p(67.38\%)$  |
| $\sigma(C2-C5)$   | 1.97705                | $sp^{1.85}$ at C2<br>$sp^{1.88}$ at C5   | C2 (49.59%): $s(35.08\%)p(64.76\%)$<br>C5 (50.41%): $s(34.73\%)p(65.16\%)$   |
| $\sigma(C2-C6)$   | 1.98156                | $sp^{1.74}$ at C2<br>$sp^{1.76}$ at C6   | C2 (50.20%): $s(36.41\%)p(63.42\%)$<br>C6 (49.80%): $s(36.21\%)p(63.64\%)$   |
| $\pi(C2-C6)$      | 1.70283                | n/a                                      | C2 (52.25%): $s(0.01\%)p(99.92\%)$<br>C6 (47.75%): $s(0.00\%)p(99.92\%)$     |
| $\sigma(C3-C5)$   | 1.97710                | $sp^{1.83}$ at C3<br>$sp^{1.93}$ at C5   | C3 (49.41%): $s(35.32\%)p(64.51\%)$<br>C5 (50.59%): $s(34.09\%)p(65.80\%)$   |
| $\pi(C3-C5)$      | 1.62772                | n/a                                      | C3 (53.02%): $s(0.00\%)p(99.93\%)$<br>C5 (46.98%): $s(0.02\%)p(99.91\%)$     |
| $\sigma(C3-C7)$   | 1.98263                | $sp^{1.75}$ at C3<br>$sp^{1.77}$ at C7   | C3 (50.22%): $s(36.32\%)p(63.52\%)$<br>C7 (49.78%): $s(36.03\%)p(63.81\%)$   |
| $\sigma(C6-C8)$   | 1.98350                | $sp^{1.78}$ at C6<br>$sp^{1.80}$ at C8   | C6 (50.15%): $s(35.93\%)p(63.91\%)$<br>C8 (49.85%): $s(35.67\%)p(64.18\%)$   |
| $\sigma(C7-C8)$   | 1.98339                | $sp^{1.78}$ at C7<br>$sp^{1.80}$ at C8   | C7 (50.09%): $s(35.94\%)p(63.90\%)$<br>C8 (49.91%): $s(35.68\%)p(64.17\%)$   |
| $\pi(C7-C8)$      | 1.67390                | n/a                                      | C7 (47.91%): $s(0.00\%)p(99.93\%)$<br>C8 (52.09%): $s(0.00\%)p(99.93\%)$     |
| $\sigma(C11-C12)$ | 1.97604                | $sp^{1.75}$ at C11<br>$sp^{1.88}$ at C12 | C11 (50.98%): $s(36.32\%)p(63.58\%)$<br>C12 (49.02%): $s(34.69\%)p(65.13\%)$ |
| $\pi(C11-C12)$    | 1.64011                | n/a                                      | C11 (43.42%): $s(0.00\%)p(99.91\%)$<br>C12 (56.58%): $s(0.01\%)p(99.91\%)$   |
| $\sigma(C11-C10)$ | 1.97086                | $sp^{2.21}$ at C11<br>$sp^{1.94}$ at C10 | C11 (49.07%): $s(31.07\%)p(68.81\%)$<br>C10 (50.93%): $s(33.96\%)p(65.93\%)$ |
| Lone pair 1 (N4)  | 1.86833                | $sp^{2.64}$                              | $s(27.44\%)p(72.53\%)$                                                       |
| $\sigma(N4-C9)$   | 1.98829                | $sp^{1.61}$ at N4<br>$sp^{1.93}$ at C9   | N4 (59.92%): $s(38.19\%)p(61.52\%)$<br>C9 (40.08%): $s(34.14\%)p(65.77\%)$   |
| $\pi(N4-C9)$      | 1.87004                | n/a                                      | N4 (63.44%): $s(0.00\%)p(99.84\%)$<br>C9 (36.56%): $s(0.00\%)p(99.86\%)$     |
| $\sigma(N4-C10)$  | 1.98194                | $sp^{1.91}$ at N4<br>$sp^{2.33}$ at C10  | N4 (59.50%): $s(34.26\%)p(65.47\%)$<br>C10 (40.50%): $s(29.98\%)p(69.94\%)$  |

<sup>a</sup> Calculated in gas phase at the optimized S0 geometry using M06 (gas phase/ def2-tzvpp def2/j). The M06 functional uses 27 % Hartree-Fock exchange.<sup>23</sup>

<sup>b</sup> The general formulation of a sigma natural bond orbital (NBO) is  $\sigma_{AB} = c_A h_A + c_B h_B$ , where  $h_A$  and  $h_B$  are the atom-centered hybrid orbitals of atoms A and B, and  $c_A$  and  $c_B$  are the normalized polarization coefficients of atoms A and B. If the natural ionicity of an NBO, given by  $i_{AB} = \frac{(c_A^2 - c_B^2)}{(c_A^2 + c_B^2)}$ , exceeds a fixed limit ( $|i_{AB}| > 0.95$ ), this extremely polarized “bond” is identified instead as a lone pair.<sup>20</sup>

<sup>c</sup> Orbital occupancy ( $0 \leq x \leq 2$ ) is the number of electrons in the specified NBO. Lower orbital occupancy values are indicative of stronger delocalization.<sup>20</sup>

<sup>d</sup> Hybridization of a given NBO is of the form  $sp^\lambda$ , where  $\lambda = (\frac{\%p}{\%s})$ .<sup>20</sup> Hybridizations with a very high value of  $\lambda$  (for example,  $sp^\infty$ ) have been denoted as non-applicable.

<sup>e</sup> Atomic orbital contributions denote the percent contribution of s, p, d, and f orbitals from atom A, and the percent contribution of s, p, d, and f orbitals from atom B, to their shared NBO  $\sigma_{AB}$  or  $\pi_{AB}$ .<sup>20</sup> Contributions from d and f orbitals are negligible and are omitted for simplicity. The percent contributions from each atom A ( $c_A^2 \times 100\%$ ) and B ( $c_B^2 \times 100\%$ ) to their shared NBO are also shown.

**Table S80.** NBO analysis<sup>a</sup> of (<sup>t</sup>BuL3)<sub>2</sub>Zn with the M06-2X functional.

| NBO <sup>b</sup>  | Occupancy <sup>c</sup> | Hybridization <sup>d</sup>               | Atomic Orbital Contributions (%) <sup>e</sup>                                |
|-------------------|------------------------|------------------------------------------|------------------------------------------------------------------------------|
| Lone pair 1 (N1)  | 1.83539                | $sp^{2.51}$                              | $s(28.47\%)p(71.50\%)$                                                       |
| Lone pair 2 (N1)  | 1.64322                | n/a                                      | $s(0.04\%)p(99.89\%)$                                                        |
| $\sigma(N1-C5)$   | 1.98488                | $sp^{1.83}$ at N1<br>$sp^{2.21}$ at C5   | N1 (58.94%): $s(35.22\%)p(64.56\%)$<br>C5 (41.06%): $s(31.13\%)p(68.79\%)$   |
| $\sigma(N1-C11)$  | 1.98351                | $sp^{1.76}$ at N1<br>$sp^{2.07}$ at C11  | N1 (58.21%): $s(36.15\%)p(63.60\%)$<br>C11 (41.79%): $s(32.58\%)p(67.32\%)$  |
| $\sigma(C2-C5)$   | 1.97800                | $sp^{1.85}$ at C2<br>$sp^{1.88}$ at C5   | C2 (49.52%): $s(34.97\%)p(64.86\%)$<br>C5 (50.48%): $s(34.71\%)p(65.19\%)$   |
| $\sigma(C2-C6)$   | 1.98224                | $sp^{1.75}$ at C2<br>$sp^{1.77}$ at C6   | C2 (50.23%): $s(36.36\%)p(63.46\%)$<br>C6 (49.77%): $s(36.10\%)p(63.74\%)$   |
| $\pi(C2-C6)$      | 1.70225                | n/a                                      | C2 (52.06%): $s(0.01\%)p(99.93\%)$<br>C6 (47.94%): $s(0.00\%)p(99.93\%)$     |
| $\sigma(C3-C5)$   | 1.97800                | $sp^{1.83}$ at C3<br>$sp^{1.93}$ at C5   | C3 (49.31%): $s(35.21\%)p(64.61\%)$<br>C5 (50.69%): $s(34.06\%)p(65.83\%)$   |
| $\pi(C3-C5)$      | 1.62899                | n/a                                      | C3 (52.91%): $s(0.00\%)p(99.93\%)$<br>C5 (47.09%): $s(0.02\%)p(99.92\%)$     |
| $\sigma(C3-C7)$   | 1.98319                | $sp^{1.75}$ at C3<br>$sp^{1.78}$ at C7   | C3 (50.25%): $s(36.26\%)p(63.56\%)$<br>C7 (49.75%): $s(35.93\%)p(63.90\%)$   |
| $\sigma(C6-C8)$   | 1.98421                | $sp^{1.78}$ at C6<br>$sp^{1.81}$ at C8   | C6 (50.14%): $s(35.86\%)p(63.97\%)$<br>C8 (49.86%): $s(35.59\%)p(64.25\%)$   |
| $\sigma(C7-C8)$   | 1.98407                | $sp^{1.78}$ at C7<br>$sp^{1.80}$ at C8   | C7 (50.07%): $s(35.85\%)p(63.97\%)$<br>C8 (49.93%): $s(35.60\%)p(64.23\%)$   |
| $\pi(C7-C8)$      | 1.67529                | n/a                                      | C7 (48.01%): $s(0.00\%)p(99.94\%)$<br>C8 (51.99%): $s(0.00\%)p(99.94\%)$     |
| $\sigma(C11-C12)$ | 1.97674                | $sp^{1.75}$ at C11<br>$sp^{1.88}$ at C12 | C11 (51.08%): $s(36.38\%)p(63.52\%)$<br>C12 (48.92%): $s(34.60\%)p(65.21\%)$ |
| $\pi(C11-C12)$    | 1.64397                | n/a                                      | C11 (43.70%): $s(0.00\%)p(99.91\%)$<br>C12 (56.30%): $s(0.01\%)p(99.91\%)$   |
| $\sigma(C11-C10)$ | 1.97194                | $sp^{2.23}$ at C11<br>$sp^{1.94}$ at C10 | C11 (48.94%): $s(30.97\%)p(68.91\%)$<br>C10 (51.06%): $s(33.97\%)p(65.93\%)$ |
| Lone pair 1 (N4)  | 1.88594                | $sp^{2.71}$                              | $s(26.92\%)p(73.06\%)$                                                       |
| $\sigma(N4-C9)$   | 1.98841                | $sp^{1.59}$ at N4<br>$sp^{1.94}$ at C9   | N4 (59.91%): $s(38.46\%)p(61.19\%)$<br>C9 (40.09%): $s(34.03\%)p(65.86\%)$   |
| $\pi(N4-C9)$      | 1.87186                | n/a                                      | N4 (62.85%): $s(0.00\%)p(99.84\%)$<br>C9 (37.15%): $s(0.00\%)p(99.87\%)$     |
| $\sigma(N4-C10)$  | 1.98240                | $sp^{1.89}$ at N4<br>$sp^{2.33}$ at C10  | N4 (59.39%): $s(34.50\%)p(65.19\%)$<br>C10 (40.61%): $s(29.99\%)p(69.93\%)$  |

<sup>a</sup> Calculated in gas phase at the optimized S0 geometry using M06-2X (gas phase/ def2-tzvpp def2/j). The M06-2X functional uses 54 % Hartree-Fock exchange.<sup>23</sup>

<sup>b</sup> The general formulation of a sigma natural bond orbital (NBO) is  $\sigma_{AB} = c_A h_A + c_B h_B$ , where  $h_A$  and  $h_B$  are the atom-centered hybrid orbitals of atoms A and B, and  $c_A$  and  $c_B$  are the normalized polarization coefficients of atoms A and B. If the natural ionicity of an NBO, given by  $i_{AB} = \frac{(c_A^2 - c_B^2)}{(c_A^2 + c_B^2)}$ , exceeds a fixed limit ( $|i_{AB}| > 0.95$ ), this extremely polarized “bond” is identified instead as a lone pair.<sup>20</sup>

<sup>c</sup> Orbital occupancy ( $0 \leq x \leq 2$ ) is the number of electrons in the specified NBO. Lower orbital occupancy values are indicative of stronger delocalization.<sup>20</sup>

<sup>d</sup> Hybridization of a given NBO is of the form  $sp^\lambda$ , where  $\lambda = \left(\frac{\%p}{\%s}\right)$ .<sup>20</sup> Hybridizations with a very high value of  $\lambda$  (for example,  $sp^\infty$ ) have been denoted as non-applicable.

<sup>e</sup> Atomic orbital contributions denote the percent contribution of s, p, d, and f orbitals from atom A, and the percent contribution of s, p, d, and f orbitals from atom B, to their shared NBO  $\sigma_{AB}$  or  $\pi_{AB}$ .<sup>20</sup> Contributions from d and f orbitals are negligible and are omitted for simplicity. The percent contributions from each atom A ( $c_A^2 \times 100\%$ ) and B ( $c_B^2 \times 100\%$ ) to their shared NBO are also shown.

**Table S81.** NBO analysis<sup>a</sup> of (<sup>t</sup>BuL3)<sub>2</sub>Zn with the CAM-B3LYP functional.

| NBO <sup>b</sup>  | Occupancy <sup>c</sup> | Hybridization <sup>d</sup>               | Atomic Orbital Contributions (%) <sup>e</sup>                                |
|-------------------|------------------------|------------------------------------------|------------------------------------------------------------------------------|
| Lone pair 1 (N1)  | 1.81921                | $sp^{2.55}$                              | $s(28.15\%)p(71.82\%)$                                                       |
| Lone pair 2 (N1)  | 1.64835                | n/a                                      | $s(0.07\%)p(99.88\%)$                                                        |
| $\sigma(N1-C5)$   | 1.98511                | $sp^{1.82}$ at N1<br>$sp^{2.21}$ at C5   | N1 (58.90%): $s(35.33\%)p(64.43\%)$<br>C5 (41.10%): $s(31.10\%)p(68.79\%)$   |
| $\sigma(N1-C11)$  | 1.98375                | $sp^{1.75}$ at N1<br>$sp^{2.07}$ at C11  | N1 (58.16%): $s(36.33\%)p(63.40\%)$<br>C11 (41.84%): $s(32.55\%)p(67.33\%)$  |
| $\sigma(C2-C5)$   | 1.97802                | $sp^{1.85}$ at C2<br>$sp^{1.88}$ at C5   | C2 (49.55%): $s(34.97\%)p(64.83\%)$<br>C5 (50.45%): $s(34.73\%)p(65.16\%)$   |
| $\sigma(C2-C6)$   | 1.98192                | $sp^{1.74}$ at C2<br>$sp^{1.76}$ at C6   | C2 (50.23%): $s(36.41\%)p(63.39\%)$<br>C6 (49.77%): $s(36.11\%)p(63.71\%)$   |
| $\pi(C2-C6)$      | 1.70191                | n/a                                      | C2 (52.18%): $s(0.01\%)p(99.93\%)$<br>C6 (47.82%): $s(0.00\%)p(99.93\%)$     |
| $\sigma(C3-C5)$   | 1.97803                | $sp^{1.83}$ at C3<br>$sp^{1.93}$ at C5   | C3 (49.36%): $s(35.22\%)p(64.59\%)$<br>C5 (50.64%): $s(34.05\%)p(65.83\%)$   |
| $\pi(C3-C5)$      | 1.62730                | n/a                                      | C3 (53.12%): $s(0.00\%)p(99.92\%)$<br>C5 (46.88%): $s(0.02\%)p(99.91\%)$     |
| $\sigma(C3-C7)$   | 1.98285                | $sp^{1.75}$ at C3<br>$sp^{1.78}$ at C7   | C3 (50.25%): $s(36.31\%)p(63.50\%)$<br>C7 (49.75%): $s(35.94\%)p(63.88\%)$   |
| $\sigma(C6-C8)$   | 1.98382                | $sp^{1.78}$ at C6<br>$sp^{1.80}$ at C8   | C6 (50.14%): $s(35.89\%)p(63.92\%)$<br>C8 (49.86%): $s(35.62\%)p(64.20\%)$   |
| $\sigma(C7-C8)$   | 1.98373                | $sp^{1.78}$ at C7<br>$sp^{1.80}$ at C8   | C7 (50.07%): $s(35.89\%)p(63.92\%)$<br>C8 (49.93%): $s(35.63\%)p(64.18\%)$   |
| $\pi(C7-C8)$      | 1.67570                | n/a                                      | C7 (47.90%): $s(0.00\%)p(99.93\%)$<br>C8 (52.10%): $s(0.00\%)p(99.94\%)$     |
| $\sigma(C11-C12)$ | 1.97653                | $sp^{1.75}$ at C11<br>$sp^{1.88}$ at C12 | C11 (51.04%): $s(36.34\%)p(63.55\%)$<br>C12 (48.96%): $s(34.65\%)p(65.15\%)$ |
| $\pi(C11-C12)$    | 1.64470                | n/a                                      | C11 (43.35%): $s(0.00\%)p(99.90\%)$<br>C12 (56.65%): $s(0.00\%)p(99.91\%)$   |
| $\sigma(C11-C10)$ | 1.97203                | $sp^{2.22}$ at C11<br>$sp^{1.94}$ at C10 | C11 (48.98%): $s(31.01\%)p(68.86\%)$<br>C10 (51.02%): $s(33.97\%)p(65.91\%)$ |
| Lone pair 1 (N4)  | 1.87748                | $sp^{2.75}$                              | $s(26.68\%)p(73.31\%)$                                                       |
| $\sigma(N4-C9)$   | 1.98823                | $sp^{1.58}$ at N4<br>$sp^{1.93}$ at C9   | N4 (59.79%): $s(38.56\%)p(61.08\%)$<br>C9 (40.21%): $s(34.07\%)p(65.81\%)$   |
| $\pi(N4-C9)$      | 1.87353                | n/a                                      | N4 (62.98%): $s(0.00\%)p(99.86\%)$<br>C9 (37.02%): $s(0.00\%)p(99.87\%)$     |
| $\sigma(N4-C10)$  | 1.98260                | $sp^{1.88}$ at N4<br>$sp^{2.33}$ at C10  | N4 (59.31%): $s(34.64\%)p(65.03\%)$<br>C10 (40.69%): $s(29.97\%)p(69.92\%)$  |

<sup>a</sup> Calculated in gas phase at the optimized S0 geometry using CAM-B3LYP (gas phase/ def2-tzvpp def2/j). The CAM-B3LYP functional is a range-separated functional, and uses 19 % Hartree-Fock exchange at short range, 33 % Hartree-Fock exchange at intermediate range, and 65 % Hartree-Fock exchange at long range.<sup>15</sup>

<sup>b</sup> The general formulation of a sigma natural bond orbital (NBO) is  $\sigma_{AB} = c_A h_A + c_B h_B$ , where  $h_A$  and  $h_B$  are the atom-centered hybrid orbitals of atoms A and B, and  $c_A$  and  $c_B$  are the normalized polarization coefficients of atoms A and B. If the natural ionicity of an NBO, given by  $i_{AB} = \frac{(c_A^2 - c_B^2)}{(c_A^2 + c_B^2)}$ , exceeds a fixed limit ( $|i_{AB}| > 0.95$ ), this extremely polarized “bond” is identified instead as a lone pair.<sup>20</sup>

<sup>c</sup> Orbital occupancy ( $0 \leq x \leq 2$ ) is the number of electrons in the specified NBO. Lower orbital occupancy values are indicative of stronger delocalization.<sup>20</sup>

<sup>d</sup> Hybridization of a given NBO is of the form  $sp^\lambda$ , where  $\lambda = \left(\frac{\%p}{\%s}\right)$ .<sup>20</sup> Hybridizations with a very high value of  $\lambda$  (for example,  $sp^\infty$ ) have been denoted as non-applicable.

<sup>e</sup> Atomic orbital contributions denote the percent contribution of s, p, d, and f orbitals from atom A, and the percent contribution of s, p, d, and f orbitals from atom B, to their shared NBO  $\sigma_{AB}$  or  $\pi_{AB}$ .<sup>20</sup> Contributions from d and f orbitals are negligible and are omitted for simplicity. The percent contributions from each atom A ( $c_A^2 \times 100\%$ ) and B ( $c_B^2 \times 100\%$ ) to their shared NBO are also shown.

**Table S82.** Solvated NBO analysis<sup>a</sup> of (tBuL3)<sub>2</sub>Zn with the M06-L functional.

| NBO <sup>b</sup>  | Occupancy <sup>c</sup> | Hybridization <sup>d</sup>               | Atomic Orbital Contributions (%) <sup>e</sup>                                |
|-------------------|------------------------|------------------------------------------|------------------------------------------------------------------------------|
| Lone pair 1 (N1)  | 1.81111                | $sp^{2.18}$                              | $s(31.41\%)p(68.57\%)$                                                       |
| Lone pair 2 (N1)  | 1.60880                | n/a                                      | $s(0.10\%)p(99.84\%)$                                                        |
| $\sigma(N1-C5)$   | 1.98383                | $sp^{1.97}$ at N1<br>$sp^{2.22}$ at C5   | N1 (59.11%): $s(33.58\%)p(66.22\%)$<br>C5 (40.89%): $s(31.02\%)p(68.90\%)$   |
| $\sigma(N1-C11)$  | 1.98283                | $sp^{1.87}$ at N1<br>$sp^{2.09}$ at C11  | N1 (58.58%): $s(34.80\%)p(64.97\%)$<br>C11 (41.42%): $s(32.33\%)p(67.58\%)$  |
| $\sigma(C2-C5)$   | 1.97805                | $sp^{1.85}$ at C2<br>$sp^{1.88}$ at C5   | C2 (49.59%): $s(35.00\%)p(64.82\%)$<br>C5 (50.41%): $s(34.72\%)p(65.16\%)$   |
| $\sigma(C2-C6)$   | 1.98224                | $sp^{1.74}$ at C2<br>$sp^{1.76}$ at C6   | C2 (50.22%): $s(36.43\%)p(63.40\%)$<br>C6 (49.78%): $s(36.14\%)p(63.70\%)$   |
| $\pi(C2-C6)$      | 1.70514                | n/a                                      | C2 (51.93%): $s(0.01\%)p(99.91\%)$<br>C6 (48.07%): $s(0.00\%)p(99.92\%)$     |
| $\sigma(C3-C5)$   | 1.97785                | $sp^{1.83}$ at C3<br>$sp^{1.92}$ at C5   | C3 (49.49%): $s(35.26\%)p(64.56\%)$<br>C5 (50.51%): $s(34.16\%)p(65.72\%)$   |
| $\pi(C3-C5)$      | 1.62661                | n/a                                      | C3 (53.06%): $s(0.00\%)p(99.92\%)$<br>C5 (46.94%): $s(0.01\%)p(99.91\%)$     |
| $\sigma(C3-C7)$   | 1.98329                | $sp^{1.75}$ at C3<br>$sp^{1.77}$ at C7   | C3 (50.26%): $s(36.36\%)p(63.46\%)$<br>C7 (49.74%): $s(35.98\%)p(63.86\%)$   |
| $\sigma(C6-C8)$   | 1.98437                | $sp^{1.78}$ at C6<br>$sp^{1.80}$ at C8   | C6 (50.12%): $s(35.91\%)p(63.91\%)$<br>C8 (49.88%): $s(35.64\%)p(64.20\%)$   |
| $\sigma(C7-C8)$   | 1.98423                | $sp^{1.78}$ at C7<br>$sp^{1.80}$ at C8   | C7 (50.11%): $s(35.94\%)p(63.88\%)$<br>C8 (49.89%): $s(35.65\%)p(64.19\%)$   |
| $\pi(C7-C8)$      | 1.67794                | n/a                                      | C7 (48.02%): $s(0.00\%)p(99.92\%)$<br>C8 (51.98%): $s(0.00\%)p(99.93\%)$     |
| $\sigma(C11-C12)$ | 1.97700                | $sp^{1.75}$ at C11<br>$sp^{1.88}$ at C12 | C11 (50.96%): $s(36.33\%)p(63.57\%)$<br>C12 (49.04%): $s(34.65\%)p(65.17\%)$ |
| $\pi(C11-C12)$    | 1.64755                | n/a                                      | C11 (44.36%): $s(0.00\%)p(99.91\%)$<br>C12 (55.64%): $s(0.00\%)p(99.91\%)$   |
| $\sigma(C11-C10)$ | 1.97095                | $sp^{2.19}$ at C11<br>$sp^{1.94}$ at C10 | C11 (49.20%): $s(31.27\%)p(68.60\%)$<br>C10 (50.80%): $s(33.93\%)p(65.95\%)$ |
| Lone pair 1 (N4)  | 1.86668                | $sp^{2.43}$                              | $s(29.15\%)p(70.83\%)$                                                       |
| $\sigma(N4-C9)$   | 1.98848                | $sp^{1.66}$ at N4<br>$sp^{1.95}$ at C9   | N4 (60.08%): $s(37.50\%)p(62.19\%)$<br>C9 (39.92%): $s(33.84\%)p(66.06\%)$   |
| $\pi(N4-C9)$      | 1.86174                | n/a                                      | N4 (63.51%): $s(0.00\%)p(99.86\%)$<br>C9 (36.49%): $s(0.00\%)p(99.86\%)$     |
| $\sigma(N4-C10)$  | 1.98183                | $sp^{2.00}$ at N4<br>$sp^{2.34}$ at C10  | N4 (59.37%): $s(33.22\%)p(66.50\%)$<br>C10 (40.63%): $s(29.95\%)p(69.97\%)$  |

<sup>a</sup> Calculated in solution at the optimized S0 geometry using M06-L (SMD “dichloromethane”/ def2-tzvpp def2/j). The M06-L functional uses 0 % Hartree-Fock exchange.<sup>19</sup>

<sup>b</sup> The general formulation of a sigma natural bond orbital (NBO) is  $\sigma_{AB} = c_A h_A + c_B h_B$ , where  $h_A$  and  $h_B$  are the atom-centered hybrid orbitals of atoms A and B, and  $c_A$  and  $c_B$  are the normalized polarization coefficients of atoms A and B. If the natural ionicity of an NBO, given by  $i_{AB} = \frac{(c_A^2 - c_B^2)}{(c_A^2 + c_B^2)}$ , exceeds a fixed limit ( $|i_{AB}| > 0.95$ ), this extremely polarized “bond” is identified instead as a lone pair.<sup>20</sup>

<sup>c</sup> Orbital occupancy ( $0 \leq x \leq 2$ ) is the number of electrons in the specified NBO. Lower orbital occupancy values are indicative of stronger delocalization.<sup>20</sup>

<sup>d</sup> Hybridization of a given NBO is of the form  $sp^\lambda$ , where  $\lambda = \left(\frac{\%p}{\%s}\right)$ .<sup>20</sup> Hybridizations with a very high value of  $\lambda$  (for example,  $sp^\infty$ ) have been denoted as non-applicable.

<sup>e</sup> Atomic orbital contributions denote the percent contribution of s, p, d, and f orbitals from atom A, and the percent contribution of s, p, d, and f orbitals from atom B, to their shared NBO  $\sigma_{AB}$  or  $\pi_{AB}$ .<sup>20</sup> Contributions from d and f orbitals are negligible and are omitted for simplicity. The percent contributions from each atom A ( $c_A^2 \times 100\%$ ) and B ( $c_B^2 \times 100\%$ ) to their shared NBO are also shown.

**Table S83.** Solvated NBO analysis<sup>a</sup> of (<sup>t</sup>BuL3)<sub>2</sub>Zn with the TPSSh functional.

| NBO <sup>b</sup>  | Occupancy <sup>c</sup> | Hybridization <sup>d</sup>               | Atomic Orbital Contributions (%) <sup>e</sup>                                |
|-------------------|------------------------|------------------------------------------|------------------------------------------------------------------------------|
| Lone pair 1 (N1)  | 1.81076                | $sp^{2.38}$                              | $s(29.62\%)p(70.35\%)$                                                       |
| Lone pair 2 (N1)  | 1.61582                | n/a                                      | $s(0.10\%)p(99.85\%)$                                                        |
| $\sigma(N1-C5)$   | 1.98436                | $sp^{1.90}$ at N1<br>$sp^{2.21}$ at C5   | N1 (58.89%): $s(34.43\%)p(65.35\%)$<br>C5 (41.11%): $s(31.10\%)p(68.80\%)$   |
| $\sigma(N1-C11)$  | 1.98322                | $sp^{1.79}$ at N1<br>$sp^{2.08}$ at C11  | N1 (58.32%): $s(35.73\%)p(64.03\%)$<br>C11 (41.68%): $s(32.40\%)p(67.49\%)$  |
| $\sigma(C2-C5)$   | 1.97825                | $sp^{1.87}$ at C2<br>$sp^{1.89}$ at C5   | C2 (49.44%): $s(34.82\%)p(65.00\%)$<br>C5 (50.56%): $s(34.74\%)p(65.15\%)$   |
| $\sigma(C2-C6)$   | 1.98212                | $sp^{1.75}$ at C2<br>$sp^{1.77}$ at C6   | C2 (50.24%): $s(36.32\%)p(63.49\%)$<br>C6 (49.76%): $s(35.99\%)p(63.84\%)$   |
| $\pi(C2-C6)$      | 1.70270                | n/a                                      | C2 (51.69%): $s(0.01\%)p(99.92\%)$<br>C6 (48.31%): $s(0.00\%)p(99.92\%)$     |
| $\sigma(C3-C5)$   | 1.97796                | $sp^{1.84}$ at C3<br>$sp^{1.93}$ at C5   | C3 (49.33%): $s(35.10\%)p(64.72\%)$<br>C5 (50.67%): $s(34.07\%)p(65.82\%)$   |
| $\sigma(C3-C7)$   | 1.98316                | n/a                                      | C3 (50.28%): $s(36.24\%)p(63.58\%)$<br>C7 (49.72%): $s(35.82\%)p(64.00\%)$   |
| $\pi(C3-C7)$      | 1.69983                | n/a                                      | C3 (51.73%): $s(0.01\%)p(99.92\%)$<br>C7 (48.27%): $s(0.00\%)p(99.93\%)$     |
| $\sigma(C6-C8)$   | 1.98455                | $sp^{1.79}$ at C6<br>$sp^{1.81}$ at C8   | C6 (50.11%): $s(35.76\%)p(64.05\%)$<br>C8 (49.89%): $s(35.51\%)p(64.31\%)$   |
| $\sigma(C7-C8)$   | 1.98442                | $sp^{1.79}$ at C7<br>$sp^{1.81}$ at C8   | C7 (50.10%): $s(35.80\%)p(64.02\%)$<br>C8 (49.90%): $s(35.52\%)p(64.31\%)$   |
| Lone pair 1 (C31) | 1.04616                | n/a                                      | $s(0.00\%)p(99.95\%)$                                                        |
| $\sigma(C11-C12)$ | 1.97651                | $sp^{1.75}$ at C11<br>$sp^{1.89}$ at C12 | C11 (51.14%): $s(36.38\%)p(63.51\%)$<br>C12 (48.86%): $s(34.49\%)p(65.32\%)$ |
| $\pi(C11-C12)$    | 1.64701                | n/a                                      | C11 (45.00%): $s(0.00\%)p(99.92\%)$<br>C12 (55.00%): $s(0.00\%)p(99.91\%)$   |
| $\sigma(C11-C10)$ | 1.97106                | $sp^{2.21}$ at C11<br>$sp^{1.95}$ at C10 | C11 (49.17%): $s(31.14\%)p(68.74\%)$<br>C10 (50.83%): $s(33.88\%)p(66.01\%)$ |
| Lone pair 1 (N4)  | 1.86686                | $sp^{2.58}$                              | $s(27.93\%)p(72.06\%)$                                                       |
| $\sigma(N4-C9)$   | 1.98858                | $sp^{1.62}$ at N4<br>$sp^{1.95}$ at C9   | N4 (60.01%): $s(38.07\%)p(61.59\%)$<br>C9 (39.99%): $s(33.81\%)p(66.07\%)$   |
| $\pi(N4-C9)$      | 1.86186                | n/a                                      | N4 (63.72%): $s(0.00\%)p(99.87\%)$<br>C9 (36.28%): $s(0.00\%)p(99.87\%)$     |
| $\sigma(N4-C10)$  | 1.98257                | $sp^{1.94}$ at N4<br>$sp^{2.33}$ at C10  | N4 (59.15%): $s(33.88\%)p(65.82\%)$<br>C10 (40.85%): $s(30.03\%)p(69.88\%)$  |

<sup>a</sup> Calculated in solution at the optimized S0 geometry using TPSSh (SMD “dichloromethane”/ def2-tzvpp def2/j). The TPSSh functional uses 10 % Hartree-Fock exchange.<sup>11</sup>

<sup>b</sup> The general formulation of a sigma natural bond orbital (NBO) is  $\sigma_{AB} = c_A h_A + c_B h_B$ , where  $h_A$  and  $h_B$  are the atom-centered hybrid orbitals of atoms A and B, and  $c_A$  and  $c_B$  are the normalized polarization coefficients of atoms A and B. If the natural ionicity of an NBO, given by  $i_{AB} = \frac{(c_A^2 - c_B^2)}{(c_A^2 + c_B^2)}$ , exceeds a fixed limit ( $|i_{AB}| > 0.95$ ), this extremely polarized “bond” is identified instead as a lone pair.<sup>20</sup>

<sup>c</sup> Orbital occupancy ( $0 \leq x \leq 2$ ) is the number of electrons in the specified NBO. Lower orbital occupancy values are indicative of stronger delocalization.<sup>20</sup>

<sup>d</sup> Hybridization of a given NBO is of the form  $sp^\lambda$ , where  $\lambda = (\frac{\%p}{\%s})$ .<sup>20</sup> Hybridizations with a very high value of  $\lambda$  (for example,  $sp^\infty$ ) have been denoted as non-applicable.

<sup>e</sup> Atomic orbital contributions denote the percent contribution of s, p, d, and f orbitals from atom A, and the percent contribution of s, p, d, and f orbitals from atom B, to their shared NBO  $\sigma_{AB}$  or  $\pi_{AB}$ .<sup>20</sup> Contributions from d and f orbitals are negligible and are omitted for simplicity. The percent contributions from each atom A ( $c_A^2 \times 100\%$ ) and B ( $c_B^2 \times 100\%$ ) to their shared NBO are also shown.

**Table S84.** Solvated NBO analysis<sup>a</sup> of (tBuL3)<sub>2</sub>Zn with the O3LYP functional.

| NBO <sup>b</sup>  | Occupancy <sup>c</sup> | Hybridization <sup>d</sup>               | Atomic Orbital Contributions (%) <sup>e</sup>                                |
|-------------------|------------------------|------------------------------------------|------------------------------------------------------------------------------|
| Lone pair 1 (N1)  | 1.81000                | $sp^{2.41}$                              | $s(29.34\%)p(70.63\%)$                                                       |
| Lone pair 2 (N1)  | 1.61221                | n/a                                      | $s(0.09\%)p(99.86\%)$                                                        |
| $\sigma(N1-C5)$   | 1.98434                | $sp^{1.88}$ at N1<br>$sp^{2.21}$ at C5   | N1 (58.74%): $s(34.59\%)p(65.20\%)$<br>C5 (41.26%): $s(31.13\%)p(68.77\%)$   |
| $\sigma(N1-C11)$  | 1.98313                | $sp^{1.78}$ at N1<br>$sp^{2.08}$ at C11  | N1 (58.19%): $s(35.85\%)p(63.90\%)$<br>C11 (41.81%): $s(32.42\%)p(67.44\%)$  |
| $\sigma(C2-C5)$   | 1.97770                | $sp^{1.87}$ at C2<br>$sp^{1.88}$ at C5   | C2 (49.44%): $s(34.78\%)p(65.05\%)$<br>C5 (50.56%): $s(34.73\%)p(65.16\%)$   |
| $\sigma(C2-C6)$   | 1.98163                | $sp^{1.75}$ at C2<br>$sp^{1.78}$ at C6   | C2 (50.23%): $s(36.30\%)p(63.53\%)$<br>C6 (49.77%): $s(35.97\%)p(63.88\%)$   |
| $\pi(C2-C6)$      | 1.70301                | n/a                                      | C2 (51.60%): $s(0.01\%)p(99.93\%)$<br>C6 (48.40%): $s(0.00\%)p(99.93\%)$     |
| $\sigma(C3-C5)$   | 1.97754                | $sp^{1.85}$ at C3<br>$sp^{1.94}$ at C5   | C3 (49.34%): $s(35.06\%)p(64.77\%)$<br>C5 (50.66%): $s(34.03\%)p(65.87\%)$   |
| $\pi(C3-C5)$      | 1.62735                | n/a                                      | C3 (52.50%): $s(0.00\%)p(99.93\%)$<br>C5 (47.50%): $s(0.02\%)p(99.91\%)$     |
| $\sigma(C3-C7)$   | 1.98265                | $sp^{1.76}$ at C3<br>$sp^{1.79}$ at C7   | C3 (50.28%): $s(36.22\%)p(63.61\%)$<br>C7 (49.72%): $s(35.80\%)p(64.04\%)$   |
| $\sigma(C6-C8)$   | 1.98400                | $sp^{1.79}$ at C6<br>$sp^{1.81}$ at C8   | C6 (50.11%): $s(35.75\%)p(64.08\%)$<br>C8 (49.89%): $s(35.49\%)p(64.35\%)$   |
| $\sigma(C7-C8)$   | 1.98387                | $sp^{1.79}$ at C7<br>$sp^{1.81}$ at C8   | C7 (50.09%): $s(35.79\%)p(64.04\%)$<br>C8 (49.91%): $s(35.50\%)p(64.34\%)$   |
| $\pi(C7-C8)$      | 1.67905                | n/a                                      | C7 (48.21%): $s(0.00\%)p(99.94\%)$<br>C8 (51.79%): $s(0.00\%)p(99.94\%)$     |
| $\sigma(C11-C12)$ | 1.97608                | $sp^{1.75}$ at C11<br>$sp^{1.90}$ at C12 | C11 (51.13%): $s(36.37\%)p(63.53\%)$<br>C12 (48.87%): $s(34.44\%)p(65.39\%)$ |
| $\pi(C11-C12)$    | 1.64562                | n/a                                      | C11 (45.19%): $s(0.00\%)p(99.92\%)$<br>C12 (54.81%): $s(0.00\%)p(99.92\%)$   |
| $\sigma(C11-C10)$ | 1.97068                | $sp^{2.21}$ at C11<br>$sp^{1.95}$ at C10 | C11 (49.20%): $s(31.10\%)p(68.79\%)$<br>C10 (50.80%): $s(33.83\%)p(66.07\%)$ |
| Lone pair 1 (N4)  | 1.86514                | $sp^{2.60}$                              | $s(27.78\%)p(72.20\%)$                                                       |
| $\sigma(N4-C9)$   | 1.98840                | $sp^{1.61}$ at N4<br>$sp^{1.95}$ at C9   | N4 (59.89%): $s(38.19\%)p(61.48\%)$<br>C9 (40.11%): $s(33.81\%)p(66.07\%)$   |
| $\pi(N4-C9)$      | 1.86292                | n/a                                      | N4 (63.64%): $s(0.00\%)p(99.87\%)$<br>C9 (36.36%): $s(0.00\%)p(99.88\%)$     |
| $\sigma(N4-C10)$  | 1.98238                | $sp^{1.94}$ at N4<br>$sp^{2.32}$ at C10  | N4 (58.98%): $s(33.90\%)p(65.80\%)$<br>C10 (41.02%): $s(30.10\%)p(69.81\%)$  |

<sup>a</sup> Calculated in solution at the optimized S0 geometry using O3LYP (SMD “dichloromethane”/ def2-tzvpp def2/j). The O3LYP functional uses 11.61 % Hartree-Fock exchange.<sup>21</sup>

<sup>b</sup> The general formulation of a sigma natural bond orbital (NBO) is  $\sigma_{AB} = c_A h_A + c_B h_B$ , where  $h_A$  and  $h_B$  are the atom-centered hybrid orbitals of atoms A and B, and  $c_A$  and  $c_B$  are the normalized polarization coefficients of atoms A and B. If the natural ionicity of an NBO, given by  $i_{AB} = \frac{(c_A^2 - c_B^2)}{(c_A^2 + c_B^2)}$ , exceeds a fixed limit ( $|i_{AB}| > 0.95$ ), this extremely polarized “bond” is identified instead as a lone pair.<sup>20</sup>

<sup>c</sup> Orbital occupancy ( $0 \leq x \leq 2$ ) is the number of electrons in the specified NBO. Lower orbital occupancy values are indicative of stronger delocalization.<sup>20</sup>

<sup>d</sup> Hybridization of a given NBO is of the form  $sp^\lambda$ , where  $\lambda = (\frac{\%p}{\%s})$ .<sup>20</sup> Hybridizations with a very high value of  $\lambda$  (for example,  $sp^\infty$ ) have been denoted as non-applicable.

<sup>e</sup> Atomic orbital contributions denote the percent contribution of s, p, d, and f orbitals from atom A, and the percent contribution of s, p, d, and f orbitals from atom B, to their shared NBO  $\sigma_{AB}$  or  $\pi_{AB}$ .<sup>20</sup> Contributions from d and f orbitals are negligible and are omitted for simplicity. The percent contributions from each atom A ( $c_A^2 \times 100\%$ ) and B ( $c_B^2 \times 100\%$ ) to their shared NBO are also shown.

**Table S85.** Solvated NBO analysis<sup>a</sup> of (<sup>t</sup>BuL3)<sub>2</sub>Zn with the B3LYP functional.

| NBO <sup>b</sup>  | Occupancy <sup>c</sup> | Hybridization <sup>d</sup>               | Atomic Orbital Contributions (%) <sup>e</sup>                                |
|-------------------|------------------------|------------------------------------------|------------------------------------------------------------------------------|
| Lone pair 1 (N1)  | 1.81367                | $sp^{2.45}$                              | $s(29.02\%)p(70.96\%)$                                                       |
| Lone pair 2 (N1)  | 1.62637                | n/a                                      | $s(0.10\%)p(99.85\%)$                                                        |
| $\sigma(N1-C5)$   | 1.98460                | $sp^{1.87}$ at N1<br>$sp^{2.20}$ at C5   | N1 (58.82%): $s(34.75\%)p(65.03\%)$<br>C5 (41.18%): $s(31.17\%)p(68.72\%)$   |
| $\sigma(N1-C11)$  | 1.98340                | $sp^{1.77}$ at N1<br>$sp^{2.08}$ at C11  | N1 (58.29%): $s(36.02\%)p(63.72\%)$<br>C11 (41.71%): $s(32.47\%)p(67.41\%)$  |
| $\sigma(C2-C5)$   | 1.97784                | $sp^{1.86}$ at C2<br>$sp^{1.88}$ at C5   | C2 (49.48%): $s(34.84\%)p(64.96\%)$<br>C5 (50.52%): $s(34.69\%)p(65.20\%)$   |
| $\sigma(C2-C6)$   | 1.98196                | $sp^{1.75}$ at C2<br>$sp^{1.77}$ at C6   | C2 (50.22%): $s(36.35\%)p(63.46\%)$<br>C6 (49.78%): $s(36.02\%)p(63.81\%)$   |
| $\pi(C2-C6)$      | 1.70278                | n/a                                      | C2 (51.78%): $s(0.01\%)p(99.93\%)$<br>C6 (48.22%): $s(0.00\%)p(99.93\%)$     |
| $\sigma(C3-C5)$   | 1.97782                | $sp^{1.84}$ at C3<br>$sp^{1.94}$ at C5   | C3 (49.37%): $s(35.13\%)p(64.67\%)$<br>C5 (50.63%): $s(34.01\%)p(65.86\%)$   |
| $\pi(C3-C5)$      | 1.62686                | n/a                                      | C3 (52.93%): $s(0.00\%)p(99.93\%)$<br>C5 (47.07%): $s(0.02\%)p(99.91\%)$     |
| $\sigma(C3-C7)$   | 1.98291                | $sp^{1.75}$ at C3<br>$sp^{1.78}$ at C7   | C3 (50.26%): $s(36.27\%)p(63.55\%)$<br>C7 (49.74%): $s(35.86\%)p(63.96\%)$   |
| $\sigma(C6-C8)$   | 1.98405                | $sp^{1.79}$ at C6<br>$sp^{1.81}$ at C8   | C6 (50.11%): $s(35.81\%)p(64.00\%)$<br>C8 (49.89%): $s(35.54\%)p(64.28\%)$   |
| $\sigma(C7-C8)$   | 1.98393                | $sp^{1.78}$ at C7<br>$sp^{1.81}$ at C8   | C7 (50.09%): $s(35.84\%)p(63.97\%)$<br>C8 (49.91%): $s(35.55\%)p(64.27\%)$   |
| $\pi(C7-C8)$      | 1.67996                | n/a                                      | C7 (48.01%): $s(0.00\%)p(99.94\%)$<br>C8 (51.99%): $s(0.00\%)p(99.94\%)$     |
| $\sigma(C11-C12)$ | 1.97635                | $sp^{1.75}$ at C11<br>$sp^{1.89}$ at C12 | C11 (51.11%): $s(36.34\%)p(63.55\%)$<br>C12 (48.89%): $s(34.51\%)p(65.29\%)$ |
| $\pi(C11-C12)$    | 1.64854                | n/a                                      | C11 (44.51%): $s(0.00\%)p(99.92\%)$<br>C12 (55.49%): $s(0.00\%)p(99.92\%)$   |
| $\sigma(C11-C10)$ | 1.97119                | $sp^{2.21}$ at C11<br>$sp^{1.95}$ at C10 | C11 (49.17%): $s(31.10\%)p(68.77\%)$<br>C10 (50.83%): $s(33.84\%)p(66.05\%)$ |
| Lone pair 1 (N4)  | 1.86995                | $sp^{2.66}$                              | $s(27.33\%)p(72.66\%)$                                                       |
| $\sigma(N4-C9)$   | 1.98834                | $sp^{1.60}$ at N4<br>$sp^{1.95}$ at C9   | N4 (59.97%): $s(38.40\%)p(61.25\%)$<br>C9 (40.03%): $s(33.88\%)p(65.99\%)$   |
| $\pi(N4-C9)$      | 1.86510                | n/a                                      | N4 (63.78%): $s(0.00\%)p(99.87\%)$<br>C9 (36.22%): $s(0.00\%)p(99.88\%)$     |
| $\sigma(N4-C10)$  | 1.98257                | $sp^{1.92}$ at N4<br>$sp^{2.32}$ at C10  | N4 (59.15%): $s(34.16\%)p(65.53\%)$<br>C10 (40.85%): $s(30.10\%)p(69.80\%)$  |

<sup>a</sup> Calculated in solution at the optimized S0 geometry using B3LYP (SMD “dichloromethane”/ def2-tzvpp def2/j). The B3LYP functional uses 20 % Hartree-Fock exchange.<sup>22</sup>

<sup>b</sup> The general formulation of a sigma natural bond orbital (NBO) is  $\sigma_{AB} = c_A h_A + c_B h_B$ , where  $h_A$  and  $h_B$  are the atom-centered hybrid orbitals of atoms A and B, and  $c_A$  and  $c_B$  are the normalized polarization coefficients of atoms A and B. If the natural ionicity of an NBO, given by  $i_{AB} = \frac{(c_A^2 - c_B^2)}{(c_A^2 + c_B^2)}$ , exceeds a fixed limit ( $|i_{AB}| > 0.95$ ), this extremely polarized “bond” is identified instead as a lone pair.<sup>20</sup>

<sup>c</sup> Orbital occupancy ( $0 \leq x \leq 2$ ) is the number of electrons in the specified NBO. Lower orbital occupancy values are indicative of stronger delocalization.<sup>20</sup>

<sup>d</sup> Hybridization of a given NBO is of the form  $sp^\lambda$ , where  $\lambda = (\frac{\%p}{\%s})$ .<sup>20</sup> Hybridizations with a very high value of  $\lambda$  (for example,  $sp^\infty$ ) have been denoted as non-applicable.

<sup>e</sup> Atomic orbital contributions denote the percent contribution of s, p, d, and f orbitals from atom A, and the percent contribution of s, p, d, and f orbitals from atom B, to their shared NBO  $\sigma_{AB}$  or  $\pi_{AB}$ .<sup>20</sup> Contributions from d and f orbitals are negligible and are omitted for simplicity. The percent contributions from each atom A ( $c_A^2 \times 100\%$ ) and B ( $c_B^2 \times 100\%$ ) to their shared NBO are also shown.

**Table S86.** Solvated NBO analysis<sup>a</sup> of (tBuL3)<sub>2</sub>Zn with the PBE0 functional.

| NBO <sup>b</sup>  | Occupancy <sup>c</sup> | Hybridization <sup>d</sup>               | Atomic Orbital Contributions (%) <sup>e</sup>                                |
|-------------------|------------------------|------------------------------------------|------------------------------------------------------------------------------|
| Lone pair 1 (N1)  | 1.81745                | $sp^{2.45}$                              | $s(28.96\%)p(71.01\%)$                                                       |
| Lone pair 2 (N1)  | 1.63057                | n/a                                      | $s(0.09\%)p(99.85\%)$                                                        |
| $\sigma(N1-C5)$   | 1.98479                | $sp^{1.87}$ at N1<br>$sp^{2.21}$ at C5   | N1 (58.79%): $s(34.80\%)p(64.97\%)$<br>C5 (41.21%): $s(31.17\%)p(68.73\%)$   |
| $\sigma(N1-C11)$  | 1.98355                | $sp^{1.77}$ at N1<br>$sp^{2.08}$ at C11  | N1 (58.22%): $s(36.03\%)p(63.71\%)$<br>C11 (41.78%): $s(32.47\%)p(67.41\%)$  |
| $\sigma(C2-C5)$   | 1.97813                | $sp^{1.87}$ at C2<br>$sp^{1.88}$ at C5   | C2 (49.50%): $s(34.81\%)p(65.00\%)$<br>C5 (50.50%): $s(34.70\%)p(65.19\%)$   |
| $\sigma(C2-C6)$   | 1.98207                | $sp^{1.75}$ at C2<br>$sp^{1.78}$ at C6   | C2 (50.24%): $s(36.29\%)p(63.52\%)$<br>C6 (49.76%): $s(35.97\%)p(63.86\%)$   |
| $\pi(C2-C6)$      | 1.70206                | n/a                                      | C2 (51.85%): $s(0.01\%)p(99.92\%)$<br>C6 (48.15%): $s(0.00\%)p(99.92\%)$     |
| $\sigma(C3-C5)$   | 1.97808                | $sp^{1.84}$ at C3<br>$sp^{1.94}$ at C5   | C3 (49.38%): $s(35.10\%)p(64.71\%)$<br>C5 (50.62%): $s(34.02\%)p(65.86\%)$   |
| $\pi(C3-C5)$      | 1.62815                | n/a                                      | C3 (52.89%): $s(0.00\%)p(99.92\%)$<br>C5 (47.11%): $s(0.02\%)p(99.91\%)$     |
| $\sigma(C3-C7)$   | 1.98304                | $sp^{1.76}$ at C3<br>$sp^{1.79}$ at C7   | C3 (50.28%): $s(36.21\%)p(63.60\%)$<br>C7 (49.72%): $s(35.80\%)p(64.02\%)$   |
| $\sigma(C6-C8)$   | 1.98431                | $sp^{1.79}$ at C6<br>$sp^{1.81}$ at C8   | C6 (50.11%): $s(35.74\%)p(64.07\%)$<br>C8 (49.89%): $s(35.49\%)p(64.34\%)$   |
| $\sigma(C7-C8)$   | 1.98418                | $sp^{1.79}$ at C7<br>$sp^{1.81}$ at C8   | C7 (50.09%): $s(35.78\%)p(64.04\%)$<br>C8 (49.91%): $s(35.49\%)p(64.33\%)$   |
| $\pi(C7-C8)$      | 1.67909                | n/a                                      | C7 (48.01%): $s(0.00\%)p(99.93\%)$<br>C8 (51.99%): $s(0.00\%)p(99.94\%)$     |
| $\sigma(C11-C12)$ | 1.97649                | $sp^{1.75}$ at C11<br>$sp^{1.90}$ at C12 | C11 (51.09%): $s(36.36\%)p(63.53\%)$<br>C12 (48.91%): $s(34.47\%)p(65.34\%)$ |
| $\pi(C11-C12)$    | 1.65006                | n/a                                      | C11 (44.47%): $s(0.00\%)p(99.91\%)$<br>C12 (55.53%): $s(0.00\%)p(99.91\%)$   |
| $\sigma(C11-C10)$ | 1.97138                | $sp^{2.21}$ at C11<br>$sp^{1.95}$ at C10 | C11 (49.15%): $s(31.08\%)p(68.79\%)$<br>C10 (50.85%): $s(33.85\%)p(66.03\%)$ |
| Lone pair 1 (N4)  | 1.87193                | $sp^{2.64}$                              | $s(27.47\%)p(72.52\%)$                                                       |
| $\sigma(N4-C9)$   | 1.98857                | $sp^{1.60}$ at N4<br>$sp^{1.95}$ at C9   | N4 (59.92%): $s(38.30\%)p(61.34\%)$<br>C9 (40.08%): $s(33.85\%)p(66.03\%)$   |
| $\pi(N4-C9)$      | 1.86570                | n/a                                      | N4 (63.95%): $s(0.00\%)p(99.86\%)$<br>C9 (36.05%): $s(0.00\%)p(99.86\%)$     |
| $\sigma(N4-C10)$  | 1.98276                | $sp^{1.92}$ at N4<br>$sp^{2.32}$ at C10  | N4 (59.04%): $s(34.10\%)p(65.57\%)$<br>C10 (40.96%): $s(30.08\%)p(69.82\%)$  |

<sup>a</sup> Calculated in solution at the optimized S0 geometry using PBE0 (SMD “dichloromethane”/ def2-tzvp def2/j). The PBE0 functional uses 25 % Hartree-Fock exchange.<sup>14</sup>

<sup>b</sup> The general formulation of a sigma natural bond orbital (NBO) is  $\sigma_{AB} = c_A h_A + c_B h_B$ , where  $h_A$  and  $h_B$  are the atom-centered hybrid orbitals of atoms A and B, and  $c_A$  and  $c_B$  are the normalized polarization coefficients of atoms A and B. If the natural ionicity of an NBO, given by  $i_{AB} = \frac{(c_A^2 - c_B^2)}{(c_A^2 + c_B^2)}$ , exceeds a fixed limit ( $|i_{AB}| > 0.95$ ), this extremely polarized “bond” is identified instead as a lone pair.<sup>20</sup>

<sup>c</sup> Orbital occupancy ( $0 \leq x \leq 2$ ) is the number of electrons in the specified NBO. Lower orbital occupancy values are indicative of stronger delocalization.<sup>20</sup>

<sup>d</sup> Hybridization of a given NBO is of the form  $sp^\lambda$ , where  $\lambda = \left(\frac{\%p}{\%s}\right)$ .<sup>20</sup> Hybridizations with a very high value of  $\lambda$  (for example,  $sp^\infty$ ) have been denoted as non-applicable.

<sup>e</sup> Atomic orbital contributions denote the percent contribution of s, p, d, and f orbitals from atom A, and the percent contribution of s, p, d, and f orbitals from atom B, to their shared NBO  $\sigma_{AB}$  or  $\pi_{AB}$ .<sup>20</sup> Contributions from d and f orbitals are negligible and are omitted for simplicity. The percent contributions from each atom A ( $c_A^2 \times 100\%$ ) and B ( $c_B^2 \times 100\%$ ) to their shared NBO are also shown.

**Table S87.** Solvated NBO analysis<sup>a</sup> of (<sup>t</sup>BuL3)<sub>2</sub>Zn with the M06 functional.

| NBO <sup>b</sup>  | Occupancy <sup>c</sup> | Hybridization <sup>d</sup>               | Atomic Orbital Contributions (%) <sup>e</sup>                                |
|-------------------|------------------------|------------------------------------------|------------------------------------------------------------------------------|
| Lone pair 1 (N1)  | 1.80959                | $sp^{2.43}$                              | $s(29.16\%)p(70.81\%)$                                                       |
| Lone pair 2 (N1)  | 1.64041                | n/a                                      | $s(0.12\%)p(99.82\%)$                                                        |
| $\sigma(N1-C5)$   | 1.98442                | $sp^{1.87}$ at N1<br>$sp^{2.21}$ at C5   | N1 (59.12%): $s(34.72\%)p(65.09\%)$<br>C5 (40.88%): $s(31.14\%)p(68.78\%)$   |
| $\sigma(N1-C11)$  | 1.98331                | $sp^{1.78}$ at N1<br>$sp^{2.08}$ at C11  | N1 (58.51%): $s(35.89\%)p(63.89\%)$<br>C11 (41.49%): $s(32.43\%)p(67.48\%)$  |
| $\sigma(C2-C5)$   | 1.97730                | $sp^{1.85}$ at C2<br>$sp^{1.88}$ at C5   | C2 (49.57%): $s(34.97\%)p(64.86\%)$<br>C5 (50.43%): $s(34.70\%)p(65.20\%)$   |
| $\sigma(C2-C6)$   | 1.98167                | $sp^{1.75}$ at C2<br>$sp^{1.77}$ at C6   | C2 (50.21%): $s(36.34\%)p(63.49\%)$<br>C6 (49.79%): $s(36.09\%)p(63.77\%)$   |
| $\pi(C2-C6)$      | 1.70203                | n/a                                      | C2 (52.19%): $s(0.01\%)p(99.92\%)$<br>C6 (47.81%): $s(0.00\%)p(99.92\%)$     |
| $\sigma(C3-C5)$   | 1.97737                | $sp^{1.83}$ at C3<br>$sp^{1.93}$ at C5   | C3 (49.45%): $s(35.25\%)p(64.58\%)$<br>C5 (50.55%): $s(34.05\%)p(65.84\%)$   |
| $\pi(C3-C5)$      | 1.62941                | n/a                                      | C3 (53.32%): $s(0.00\%)p(99.93\%)$<br>C5 (46.68%): $s(0.01\%)p(99.91\%)$     |
| $\sigma(C3-C7)$   | 1.98270                | $sp^{1.75}$ at C3<br>$sp^{1.78}$ at C7   | C3 (50.24%): $s(36.26\%)p(63.58\%)$<br>C7 (49.76%): $s(35.93\%)p(63.92\%)$   |
| $\sigma(C6-C8)$   | 1.98371                | $sp^{1.79}$ at C6<br>$sp^{1.81}$ at C8   | C6 (50.12%): $s(35.82\%)p(64.02\%)$<br>C8 (49.88%): $s(35.57\%)p(64.28\%)$   |
| $\sigma(C7-C8)$   | 1.98358                | $sp^{1.78}$ at C7<br>$sp^{1.81}$ at C8   | C7 (50.11%): $s(35.86\%)p(63.98\%)$<br>C8 (49.89%): $s(35.57\%)p(64.27\%)$   |
| $\pi(C7-C8)$      | 1.67803                | n/a                                      | C7 (47.79%): $s(0.00\%)p(99.93\%)$<br>C8 (52.21%): $s(0.00\%)p(99.93\%)$     |
| $\sigma(C11-C12)$ | 1.97603                | $sp^{1.75}$ at C11<br>$sp^{1.89}$ at C12 | C11 (51.01%): $s(36.36\%)p(63.55\%)$<br>C12 (48.99%): $s(34.57\%)p(65.26\%)$ |
| $\pi(C11-C12)$    | 1.65233                | n/a                                      | C11 (43.55%): $s(0.00\%)p(99.91\%)$<br>C12 (56.45%): $s(0.00\%)p(99.91\%)$   |
| $\sigma(C11-C10)$ | 1.97084                | $sp^{2.21}$ at C11<br>$sp^{1.95}$ at C10 | C11 (49.19%): $s(31.13\%)p(68.75\%)$<br>C10 (50.81%): $s(33.87\%)p(66.02\%)$ |
| Lone pair 1 (N4)  | 1.86763                | $sp^{2.64}$                              | $s(27.45\%)p(72.53\%)$                                                       |
| $\sigma(N4-C9)$   | 1.98836                | $sp^{1.61}$ at N4<br>$sp^{1.94}$ at C9   | N4 (60.05%): $s(38.26\%)p(61.45\%)$<br>C9 (39.95%): $s(33.95\%)p(65.96\%)$   |
| $\pi(N4-C9)$      | 1.86970                | n/a                                      | N4 (64.51%): $s(0.00\%)p(99.84\%)$<br>C9 (35.49%): $s(0.00\%)p(99.85\%)$     |
| $\sigma(N4-C10)$  | 1.98226                | $sp^{1.92}$ at N4<br>$sp^{2.33}$ at C10  | N4 (59.38%): $s(34.19\%)p(65.55\%)$<br>C10 (40.62%): $s(30.03\%)p(69.89\%)$  |

<sup>a</sup> Calculated in solution at the optimized S0 geometry using M06 (SMD “dichloromethane”/ def2-tzvpp def2/j). The M06 functional uses 27 % Hartree-Fock exchange.<sup>23</sup>

<sup>b</sup> The general formulation of a sigma natural bond orbital (NBO) is  $\sigma_{AB} = c_A h_A + c_B h_B$ , where  $h_A$  and  $h_B$  are the atom-centered hybrid orbitals of atoms A and B, and  $c_A$  and  $c_B$  are the normalized polarization coefficients of atoms A and B. If the natural ionicity of an NBO, given by  $i_{AB} = \frac{(c_A^2 - c_B^2)}{(c_A^2 + c_B^2)}$ , exceeds a fixed limit ( $|i_{AB}| > 0.95$ ), this extremely polarized “bond” is identified instead as a lone pair.<sup>20</sup>

<sup>c</sup> Orbital occupancy ( $0 \leq x \leq 2$ ) is the number of electrons in the specified NBO. Lower orbital occupancy values are indicative of stronger delocalization.<sup>20</sup>

<sup>d</sup> Hybridization of a given NBO is of the form  $sp^\lambda$ , where  $\lambda = \left(\frac{\%p}{\%s}\right)$ .<sup>20</sup> Hybridizations with a very high value of  $\lambda$  (for example,  $sp^\infty$ ) have been denoted as non-applicable.

<sup>e</sup> Atomic orbital contributions denote the percent contribution of s, p, d, and f orbitals from atom A, and the percent contribution of s, p, d, and f orbitals from atom B, to their shared NBO  $\sigma_{AB}$  or  $\pi_{AB}$ .<sup>20</sup> Contributions from d and f orbitals are negligible and are omitted for simplicity. The percent contributions from each atom A ( $c_A^2 \times 100\%$ ) and B ( $c_B^2 \times 100\%$ ) to their shared NBO are also shown.

**Table S88.** Solvated NBO analysis<sup>a</sup> of (tBuL3)<sub>2</sub>Zn with the M06-2X functional.

| NBO <sup>b</sup>  | Occupancy <sup>c</sup> | Hybridization <sup>d</sup>               | Atomic Orbital Contributions (%) <sup>e</sup>                                |
|-------------------|------------------------|------------------------------------------|------------------------------------------------------------------------------|
| Lone pair 1 (N1)  | 1.83696                | $sp^{2.52}$                              | $s(28.42\%)p(71.55\%)$                                                       |
| Lone pair 2 (N1)  | 1.64833                | n/a                                      | $s(0.06\%)p(99.87\%)$                                                        |
| $\sigma(N1-C5)$   | 1.98489                | $sp^{1.84}$ at N1<br>$sp^{2.20}$ at C5   | N1 (58.83%): $s(35.14\%)p(64.64\%)$<br>C5 (41.17%): $s(31.20\%)p(68.72\%)$   |
| $\sigma(N1-C11)$  | 1.98348                | $sp^{1.75}$ at N1<br>$sp^{2.08}$ at C11  | N1 (58.28%): $s(36.27\%)p(63.47\%)$<br>C11 (41.72%): $s(32.49\%)p(67.42\%)$  |
| $\sigma(C2-C5)$   | 1.97827                | $sp^{1.87}$ at C2<br>$sp^{1.88}$ at C5   | C2 (49.48%): $s(34.84\%)p(64.98\%)$<br>C5 (50.52%): $s(34.68\%)p(65.22\%)$   |
| $\sigma(C2-C6)$   | 1.98235                | $sp^{1.75}$ at C2<br>$sp^{1.78}$ at C6   | C2 (50.25%): $s(36.29\%)p(63.53\%)$<br>C6 (49.75%): $s(35.96\%)p(63.88\%)$   |
| $\pi(C2-C6)$      | 1.70105                | n/a                                      | C2 (51.98%): $s(0.01\%)p(99.92\%)$<br>C6 (48.02%): $s(0.00\%)p(99.93\%)$     |
| $\sigma(C3-C5)$   | 1.97827                | $sp^{1.84}$ at C3<br>$sp^{1.94}$ at C5   | C3 (49.34%): $s(35.12\%)p(64.70\%)$<br>C5 (50.66%): $s(34.02\%)p(65.87\%)$   |
| $\pi(C3-C5)$      | 1.63046                | n/a                                      | C3 (53.13%): $s(0.00\%)p(99.93\%)$<br>C5 (46.87%): $s(0.01\%)p(99.92\%)$     |
| $\sigma(C3-C7)$   | 1.98326                | $sp^{1.76}$ at C3<br>$sp^{1.79}$ at C7   | C3 (50.28%): $s(36.19\%)p(63.63\%)$<br>C7 (49.72%): $s(35.81\%)p(64.02\%)$   |
| $\sigma(C6-C8)$   | 1.98443                | $sp^{1.79}$ at C6<br>$sp^{1.81}$ at C8   | C6 (50.11%): $s(35.74\%)p(64.09\%)$<br>C8 (49.89%): $s(35.48\%)p(64.36\%)$   |
| $\sigma(C7-C8)$   | 1.98429                | $sp^{1.79}$ at C7<br>$sp^{1.81}$ at C8   | C7 (50.10%): $s(35.77\%)p(64.06\%)$<br>C8 (49.90%): $s(35.48\%)p(64.35\%)$   |
| $\pi(C7-C8)$      | 1.67921                | n/a                                      | C7 (47.93%): $s(0.00\%)p(99.94\%)$<br>C8 (52.07%): $s(0.00\%)p(99.94\%)$     |
| $\sigma(C11-C12)$ | 1.97673                | $sp^{1.74}$ at C11<br>$sp^{1.90}$ at C12 | C11 (51.13%): $s(36.41\%)p(63.50\%)$<br>C12 (48.87%): $s(34.47\%)p(65.35\%)$ |
| $\pi(C11-C12)$    | 1.65589                | n/a                                      | C11 (43.87%): $s(0.00\%)p(99.92\%)$<br>C12 (56.13%): $s(0.00\%)p(99.91\%)$   |
| $\sigma(C11-C10)$ | 1.97194                | $sp^{2.22}$ at C11<br>$sp^{1.95}$ at C10 | C11 (49.07%): $s(31.04\%)p(68.85\%)$<br>C10 (50.93%): $s(33.87\%)p(66.03\%)$ |
| Lone pair 1 (N4)  | 1.88562                | $sp^{2.71}$                              | $s(26.93\%)p(73.05\%)$                                                       |
| $\sigma(N4-C9)$   | 1.98849                | $sp^{1.58}$ at N4<br>$sp^{1.95}$ at C9   | N4 (60.08%): $s(38.55\%)p(61.10\%)$<br>C9 (39.92%): $s(33.81\%)p(66.08\%)$   |
| $\pi(N4-C9)$      | 1.87103                | n/a                                      | N4 (63.91%): $s(0.00\%)p(99.84\%)$<br>C9 (36.09%): $s(0.00\%)p(99.86\%)$     |
| $\sigma(N4-C10)$  | 1.98271                | $sp^{1.90}$ at N4<br>$sp^{2.32}$ at C10  | N4 (59.24%): $s(34.40\%)p(65.29\%)$<br>C10 (40.76%): $s(30.05\%)p(69.86\%)$  |

<sup>a</sup> Calculated in solution at the optimized S0 geometry using M06-2X (SMD “dichloromethane”/ def2-tzvp def2/j). The M06-2X functional uses 54 % Hartree-Fock exchange.<sup>23</sup>

<sup>b</sup> The general formulation of a sigma natural bond orbital (NBO) is  $\sigma_{AB} = c_A h_A + c_B h_B$ , where  $h_A$  and  $h_B$  are the atom-centered hybrid orbitals of atoms A and B, and  $c_A$  and  $c_B$  are the normalized polarization coefficients of atoms A and B. If the natural ionicity of an NBO, given by  $i_{AB} = \frac{(c_A^2 - c_B^2)}{(c_A^2 + c_B^2)}$ , exceeds a fixed limit ( $|i_{AB}| > 0.95$ ), this extremely polarized “bond” is identified instead as a lone pair.<sup>20</sup>

<sup>c</sup> Orbital occupancy ( $0 \leq x \leq 2$ ) is the number of electrons in the specified NBO. Lower orbital occupancy values are indicative of stronger delocalization.<sup>20</sup>

<sup>d</sup> Hybridization of a given NBO is of the form  $sp^\lambda$ , where  $\lambda = \left(\frac{\%p}{\%s}\right)$ .<sup>20</sup> Hybridizations with a very high value of  $\lambda$  (for example,  $sp^\infty$ ) have been denoted as non-applicable.

<sup>e</sup> Atomic orbital contributions denote the percent contribution of s, p, d, and f orbitals from atom A, and the percent contribution of s, p, d, and f orbitals from atom B, to their shared NBO  $\sigma_{AB}$  or  $\pi_{AB}$ .<sup>20</sup> Contributions from d and f orbitals are negligible and are omitted for simplicity. The percent contributions from each atom A ( $c_A^2 \times 100\%$ ) and B ( $c_B^2 \times 100\%$ ) to their shared NBO are also shown.

**Table S89.** Solvated NBO analysis<sup>a</sup> of (<sup>t</sup>BuL3)<sub>2</sub>Zn with the CAM-B3LYP functional.

| NBO <sup>b</sup>  | Occupancy <sup>c</sup> | Hybridization <sup>d</sup>               | Atomic Orbital Contributions (%) <sup>e</sup>                                |
|-------------------|------------------------|------------------------------------------|------------------------------------------------------------------------------|
| Lone pair 1 (N1)  | 1.82111                | $sp^{2.56}$                              | $s(28.09\%)p(71.88\%)$                                                       |
| Lone pair 2 (N1)  | 1.65342                | n/a                                      | $s(0.10\%)p(99.85\%)$                                                        |
| $\sigma(N1-C5)$   | 1.98511                | $sp^{1.83}$ at N1<br>$sp^{2.20}$ at C5   | N1 (58.78%): $s(35.24\%)p(64.52\%)$<br>C5 (41.22%): $s(31.18\%)p(68.71\%)$   |
| $\sigma(N1-C11)$  | 1.98372                | $sp^{1.74}$ at N1<br>$sp^{2.08}$ at C11  | N1 (58.24%): $s(36.46\%)p(63.27\%)$<br>C11 (41.76%): $s(32.46\%)p(67.42\%)$  |
| $\sigma(C2-C5)$   | 1.97829                | $sp^{1.86}$ at C2<br>$sp^{1.88}$ at C5   | C2 (49.52%): $s(34.85\%)p(64.95\%)$<br>C5 (50.48%): $s(34.69\%)p(65.19\%)$   |
| $\sigma(C2-C6)$   | 1.98204                | $sp^{1.75}$ at C2<br>$sp^{1.77}$ at C6   | C2 (50.23%): $s(36.33\%)p(63.47\%)$<br>C6 (49.77%): $s(35.99\%)p(63.83\%)$   |
| $\pi(C2-C6)$      | 1.70085                | n/a                                      | C2 (52.05%): $s(0.01\%)p(99.92\%)$<br>C6 (47.95%): $s(0.00\%)p(99.92\%)$     |
| $\sigma(C3-C5)$   | 1.97830                | $sp^{1.84}$ at C3<br>$sp^{1.94}$ at C5   | C3 (49.40%): $s(35.14\%)p(64.66\%)$<br>C5 (50.60%): $s(34.00\%)p(65.87\%)$   |
| $\pi(C3-C5)$      | 1.62799                | n/a                                      | C3 (53.40%): $s(0.00\%)p(99.92\%)$<br>C5 (46.60%): $s(0.02\%)p(99.91\%)$     |
| $\sigma(C3-C7)$   | 1.98292                | $sp^{1.75}$ at C3<br>$sp^{1.79}$ at C7   | C3 (50.26%): $s(36.24\%)p(63.57\%)$<br>C7 (49.74%): $s(35.83\%)p(63.98\%)$   |
| $\sigma(C6-C8)$   | 1.98404                | $sp^{1.79}$ at C6<br>$sp^{1.81}$ at C8   | C6 (50.11%): $s(35.78\%)p(64.03\%)$<br>C8 (49.89%): $s(35.52\%)p(64.30\%)$   |
| $\sigma(C7-C8)$   | 1.98393                | $sp^{1.79}$ at C7<br>$sp^{1.81}$ at C8   | C7 (50.09%): $s(35.81\%)p(64.00\%)$<br>C8 (49.91%): $s(35.52\%)p(64.29\%)$   |
| $\pi(C7-C8)$      | 1.68053                | n/a                                      | C7 (47.79%): $s(0.00\%)p(99.93\%)$<br>C8 (52.21%): $s(0.00\%)p(99.94\%)$     |
| $\sigma(C11-C12)$ | 1.97653                | $sp^{1.75}$ at C11<br>$sp^{1.89}$ at C12 | C11 (51.08%): $s(36.37\%)p(63.52\%)$<br>C12 (48.92%): $s(34.52\%)p(65.28\%)$ |
| $\pi(C11-C12)$    | 1.65623                | n/a                                      | C11 (43.56%): $s(0.00\%)p(99.91\%)$<br>C12 (56.44%): $s(0.00\%)p(99.91\%)$   |
| $\sigma(C11-C10)$ | 1.97203                | $sp^{2.21}$ at C11<br>$sp^{1.95}$ at C10 | C11 (49.10%): $s(31.07\%)p(68.79\%)$<br>C10 (50.90%): $s(33.88\%)p(66.00\%)$ |
| Lone pair 1 (N4)  | 1.87690                | $sp^{2.75}$                              | $s(26.69\%)p(73.30\%)$                                                       |
| $\sigma(N4-C9)$   | 1.98832                | $sp^{1.58}$ at N4<br>$sp^{1.95}$ at C9   | N4 (59.94%): $s(38.64\%)p(60.99\%)$<br>C9 (40.06%): $s(33.86\%)p(66.00\%)$   |
| $\pi(N4-C9)$      | 1.87280                | n/a                                      | N4 (64.05%): $s(0.00\%)p(99.85\%)$<br>C9 (35.95%): $s(0.00\%)p(99.86\%)$     |
| $\sigma(N4-C10)$  | 1.98288                | $sp^{1.89}$ at N4<br>$sp^{2.33}$ at C10  | N4 (59.18%): $s(34.54\%)p(65.13\%)$<br>C10 (40.82%): $s(30.03\%)p(69.86\%)$  |

<sup>a</sup> Calculated in solution at the optimized S0 geometry using CAM-B3LYP (SMD “dichloromethane”/ def2-tzvpp def2/j). The CAM-B3LYP functional is a range-separated functional, and uses 19 % Hartree-Fock exchange at short range, 33 % Hartree-Fock exchange at intermediate range, and 65 % Hartree-Fock exchange at long range.<sup>15</sup>

<sup>b</sup> The general formulation of a sigma natural bond orbital (NBO) is  $\sigma_{AB} = c_A h_A + c_B h_B$ , where  $h_A$  and  $h_B$  are the atom-centered hybrid orbitals of atoms A and B, and  $c_A$  and  $c_B$  are the normalized polarization coefficients of atoms A and B. If the natural ionicity of an NBO, given by  $i_{AB} = \frac{(c_A^2 - c_B^2)}{(c_A^2 + c_B^2)}$ , exceeds a fixed limit ( $|i_{AB}| > 0.95$ ), this extremely polarized “bond” is identified instead as a lone pair.<sup>20</sup>

<sup>c</sup> Orbital occupancy ( $0 \leq x \leq 2$ ) is the number of electrons in the specified NBO. Lower orbital occupancy values are indicative of stronger delocalization.<sup>20</sup>

<sup>d</sup> Hybridization of a given NBO is of the form  $sp^\lambda$ , where  $\lambda = \left(\frac{\%p}{\%s}\right)$ .<sup>20</sup> Hybridizations with a very high value of  $\lambda$  (for example,  $sp^\infty$ ) have been denoted as non-applicable.

<sup>e</sup> Atomic orbital contributions denote the percent contribution of s, p, d, and f orbitals from atom A, and the percent contribution of s, p, d, and f orbitals from atom B, to their shared NBO  $\sigma_{AB}$  or  $\pi_{AB}$ .<sup>20</sup> Contributions from d and f orbitals are negligible and are omitted for simplicity. The percent contributions from each atom A ( $c_A^2 \times 100\%$ ) and B ( $c_B^2 \times 100\%$ ) to their shared NBO are also shown.

**Table S90.** NBO analysis<sup>a</sup> of (MeL3Me)<sub>2</sub>Zn with the M06-L functional.

| NBO <sup>b</sup>  | Occupancy <sup>c</sup> | Hybridization <sup>d</sup>               | Atomic Orbital Contributions (%) <sup>e</sup>                                |
|-------------------|------------------------|------------------------------------------|------------------------------------------------------------------------------|
| Lone pair 1 (N1)  | 1.81477                | $sp^{2.23}$                              | $s(30.94\%)p(69.04\%)$                                                       |
| Lone pair 2 (N1)  | 1.60621                | n/a                                      | $s(0.05\%)p(99.89\%)$                                                        |
| $\sigma(N1-C5)$   | 1.98380                | $sp^{1.94}$ at N1<br>$sp^{2.23}$ at C5   | N1 (59.27%): $s(33.95\%)p(65.84\%)$<br>C5 (40.73%): $s(30.95\%)p(68.96\%)$   |
| $\sigma(N1-C11)$  | 1.98284                | $sp^{1.86}$ at N1<br>$sp^{2.08}$ at C11  | N1 (58.61%): $s(34.94\%)p(64.83\%)$<br>C11 (41.39%): $s(32.41\%)p(67.50\%)$  |
| $\sigma(C2-C5)$   | 1.97734                | $sp^{1.84}$ at C2<br>$sp^{1.88}$ at C5   | C2 (49.61%): $s(35.11\%)p(64.71\%)$<br>C5 (50.39%): $s(34.73\%)p(65.15\%)$   |
| $\sigma(C2-C6)$   | 1.98211                | $sp^{1.74}$ at C2<br>$sp^{1.75}$ at C6   | C2 (50.22%): $s(36.50\%)p(63.33\%)$<br>C6 (49.78%): $s(36.27\%)p(63.57\%)$   |
| $\pi(C2-C6)$      | 1.70618                | n/a                                      | C2 (52.06%): $s(0.01\%)p(99.92\%)$<br>C6 (47.94%): $s(0.00\%)p(99.92\%)$     |
| $\sigma(C3-C5)$   | 1.97750                | $sp^{1.82}$ at C3<br>$sp^{1.92}$ at C5   | C3 (49.45%): $s(35.35\%)p(64.47\%)$<br>C5 (50.55%): $s(34.20\%)p(65.67\%)$   |
| $\pi(C3-C5)$      | 1.62631                | n/a                                      | C3 (52.79%): $s(0.00\%)p(99.92\%)$<br>C5 (47.21%): $s(0.02\%)p(99.90\%)$     |
| $\sigma(C3-C7)$   | 1.98313                | $sp^{1.74}$ at C3<br>$sp^{1.77}$ at C7   | C3 (50.25%): $s(36.38\%)p(63.45\%)$<br>C7 (49.75%): $s(36.10\%)p(63.74\%)$   |
| $\sigma(C6-C8)$   | 1.98416                | $sp^{1.77}$ at C6<br>$sp^{1.80}$ at C8   | C6 (50.15%): $s(36.01\%)p(63.82\%)$<br>C8 (49.85%): $s(35.72\%)p(64.12\%)$   |
| $\sigma(C7-C8)$   | 1.98403                | $sp^{1.77}$ at C7<br>$sp^{1.79}$ at C8   | C7 (50.09%): $s(36.02\%)p(63.81\%)$<br>C8 (49.91%): $s(35.75\%)p(64.09\%)$   |
| $\pi(C7-C8)$      | 1.67382                | n/a                                      | C7 (48.10%): $s(0.00\%)p(99.92\%)$<br>C8 (51.90%): $s(0.00\%)p(99.93\%)$     |
| $\sigma(C11-C12)$ | 1.97725                | $sp^{1.77}$ at C11<br>$sp^{1.85}$ at C12 | C11 (50.88%): $s(36.05\%)p(63.84\%)$<br>C12 (49.12%): $s(35.02\%)p(64.80\%)$ |
| $\pi(C11-C12)$    | 1.63884                | n/a                                      | C11 (44.53%): $s(0.01\%)p(99.90\%)$<br>C12 (55.47%): $s(0.01\%)p(99.91\%)$   |
| $\sigma(C11-C10)$ | 1.97095                | $sp^{2.17}$ at C11<br>$sp^{1.95}$ at C10 | C11 (49.10%): $s(31.47\%)p(68.40\%)$<br>C10 (50.90%): $s(33.91\%)p(65.97\%)$ |
| Lone pair 1 (N4)  | 1.86727                | $sp^{2.47}$                              | $s(28.84\%)p(71.13\%)$                                                       |
| $\sigma(N4-C9)$   | 1.98753                | $sp^{1.65}$ at N4<br>$sp^{2.04}$ at C9   | N4 (59.71%): $s(37.65\%)p(62.04\%)$<br>C9 (40.29%): $s(32.87\%)p(67.03\%)$   |
| $\pi(N4-C9)$      | 1.85386                | n/a                                      | N4 (64.03%): $s(0.00\%)p(99.85\%)$<br>C9 (35.97%): $s(0.00\%)p(99.85\%)$     |
| $\sigma(N4-C10)$  | 1.98131                | $sp^{1.99}$ at N4<br>$sp^{2.33}$ at C10  | N4 (59.58%): $s(33.34\%)p(66.38\%)$<br>C10 (40.42%): $s(30.01\%)p(69.91\%)$  |

<sup>a</sup> Calculated in gas phase at the optimized S0 geometry using M06-L (gas phase/ def2-tzvpp def2/j). The M06-L functional uses 0 % Hartree-Fock exchange.<sup>19</sup>

<sup>b</sup> The general formulation of a sigma natural bond orbital (NBO) is  $\sigma_{AB} = c_A h_A + c_B h_B$ , where  $h_A$  and  $h_B$  are the atom-centered hybrid orbitals of atoms A and B, and  $c_A$  and  $c_B$  are the normalized polarization coefficients of atoms A and B. If the natural ionicity of an NBO, given by  $i_{AB} = \frac{(c_A^2 - c_B^2)}{(c_A^2 + c_B^2)}$ , exceeds a fixed limit ( $|i_{AB}| > 0.95$ ), this extremely polarized “bond” is identified instead as a lone pair.<sup>20</sup>

<sup>c</sup> Orbital occupancy ( $0 \leq x \leq 2$ ) is the number of electrons in the specified NBO. Lower orbital occupancy values are indicative of stronger delocalization.<sup>20</sup>

<sup>d</sup> Hybridization of a given NBO is of the form  $sp^\lambda$ , where  $\lambda = \left(\frac{\%p}{\%s}\right)$ .<sup>20</sup> Hybridizations with a very high value of  $\lambda$  (for example,  $sp^\infty$ ) have been denoted as non-applicable.

<sup>e</sup> Atomic orbital contributions denote the percent contribution of s, p, d, and f orbitals from atom A, and the percent contribution of s, p, d, and f orbitals from atom B, to their shared NBO  $\sigma_{AB}$  or  $\pi_{AB}$ .<sup>20</sup> Contributions from d and f orbitals are negligible and are omitted for simplicity. The percent contributions from each atom A ( $c_A^2 \times 100\%$ ) and B ( $c_B^2 \times 100\%$ ) to their shared NBO are also shown.

**Table S91.** NBO analysis<sup>a</sup> of (MeL3Me)<sub>2</sub>Zn with the TPSSh functional.

| NBO <sup>b</sup>  | Occupancy <sup>c</sup> | Hybridization <sup>d</sup>               | Atomic Orbital Contributions (%) <sup>e</sup>                                |
|-------------------|------------------------|------------------------------------------|------------------------------------------------------------------------------|
| Lone pair 1 (N1)  | 1.81409                | $sp^{2.42}$                              | $s(29.21\%)p(70.76\%)$                                                       |
| Lone pair 2 (N1)  | 1.61272                | n/a                                      | $s(0.05\%)p(99.90\%)$                                                        |
| $\sigma(N1-C5)$   | 1.98419                | $sp^{1.87}$ at N1<br>$sp^{2.22}$ at C5   | N1 (59.06%): $s(34.78\%)p(65.00\%)$<br>C5 (40.94%): $s(31.03\%)p(68.87\%)$   |
| $\sigma(N1-C11)$  | 1.98310                | $sp^{1.78}$ at N1<br>$sp^{2.08}$ at C11  | N1 (58.36%): $s(35.84\%)p(63.91\%)$<br>C11 (41.64%): $s(32.48\%)p(67.41\%)$  |
| $\sigma(C2-C5)$   | 1.97742                | $sp^{1.86}$ at C2<br>$sp^{1.88}$ at C5   | C2 (49.46%): $s(34.94\%)p(64.87\%)$<br>C5 (50.54%): $s(34.74\%)p(65.15\%)$   |
| $\sigma(C2-C6)$   | 1.98196                | $sp^{1.74}$ at C2<br>$sp^{1.76}$ at C6   | C2 (50.24%): $s(36.41\%)p(63.41\%)$<br>C6 (49.76%): $s(36.14\%)p(63.70\%)$   |
| $\pi(C2-C6)$      | 1.70434                | n/a                                      | C2 (51.86%): $s(0.01\%)p(99.93\%)$<br>C6 (48.14%): $s(0.00\%)p(99.93\%)$     |
| $\sigma(C3-C5)$   | 1.97768                | $sp^{1.84}$ at C3<br>$sp^{1.93}$ at C5   | C3 (49.29%): $s(35.20\%)p(64.62\%)$<br>C5 (50.71%): $s(34.12\%)p(65.77\%)$   |
| $\pi(C3-C5)$      | 1.62681                | n/a                                      | C3 (52.29%): $s(0.00\%)p(99.93\%)$<br>C5 (47.71%): $s(0.02\%)p(99.91\%)$     |
| $\sigma(C3-C7)$   | 1.98300                | $sp^{1.75}$ at C3<br>$sp^{1.78}$ at C7   | C3 (50.27%): $s(36.27\%)p(63.56\%)$<br>C7 (49.73%): $s(35.94\%)p(63.88\%)$   |
| $\sigma(C6-C8)$   | 1.98431                | $sp^{1.78}$ at C6<br>$sp^{1.80}$ at C8   | C6 (50.15%): $s(35.87\%)p(63.95\%)$<br>C8 (49.85%): $s(35.61\%)p(64.22\%)$   |
| $\sigma(C7-C8)$   | 1.98420                | $sp^{1.78}$ at C7<br>$sp^{1.80}$ at C8   | C7 (50.07%): $s(35.89\%)p(63.93\%)$<br>C8 (49.93%): $s(35.63\%)p(64.20\%)$   |
| $\pi(C7-C8)$      | 1.67406                | n/a                                      | C7 (48.21%): $s(0.00\%)p(99.93\%)$<br>C8 (51.79%): $s(0.00\%)p(99.94\%)$     |
| $\sigma(C11-C12)$ | 1.97683                | $sp^{1.77}$ at C11<br>$sp^{1.86}$ at C12 | C11 (51.04%): $s(36.10\%)p(63.79\%)$<br>C12 (48.96%): $s(34.89\%)p(64.93\%)$ |
| $\pi(C11-C12)$    | 1.63882                | n/a                                      | C11 (44.94%): $s(0.00\%)p(99.91\%)$<br>C12 (55.06%): $s(0.01\%)p(99.91\%)$   |
| $\sigma(C11-C10)$ | 1.97093                | $sp^{2.19}$ at C11<br>$sp^{1.95}$ at C10 | C11 (49.07%): $s(31.35\%)p(68.53\%)$<br>C10 (50.93%): $s(33.85\%)p(66.04\%)$ |
| Lone pair 1 (N4)  | 1.86647                | $sp^{2.63}$                              | $s(27.57\%)p(72.42\%)$                                                       |
| $\sigma(N4-C9)$   | 1.98757                | $sp^{1.60}$ at N4<br>$sp^{2.03}$ at C9   | N4 (59.51%): $s(38.31\%)p(61.35\%)$<br>C9 (40.49%): $s(32.93\%)p(66.95\%)$   |
| $\pi(N4-C9)$      | 1.85470                | n/a                                      | N4 (63.82%): $s(0.00\%)p(99.86\%)$<br>C9 (36.18%): $s(0.00\%)p(99.87\%)$     |
| $\sigma(N4-C10)$  | 1.98153                | $sp^{1.99}$ at N4<br>$sp^{2.32}$ at C10  | N4 (59.38%): $s(33.96\%)p(65.75\%)$<br>C10 (40.62%): $s(30.10\%)p(69.80\%)$  |

<sup>a</sup> Calculated in gas phase at the optimized S0 geometry using TPSSh (gas phase/ def2-tzvpp def2/j). The TPSSh functional uses 10 % Hartree-Fock exchange.<sup>11</sup>

<sup>b</sup> The general formulation of a sigma natural bond orbital (NBO) is  $\sigma_{AB} = c_A h_A + c_B h_B$ , where  $h_A$  and  $h_B$  are the atom-centered hybrid orbitals of atoms A and B, and  $c_A$  and  $c_B$  are the normalized polarization coefficients of atoms A and B. If the natural ionicity of an NBO, given by  $i_{AB} = \frac{(c_A^2 - c_B^2)}{(c_A^2 + c_B^2)}$ , exceeds a fixed limit ( $|i_{AB}| > 0.95$ ), this extremely polarized “bond” is identified instead as a lone pair.<sup>20</sup>

<sup>c</sup> Orbital occupancy ( $0 \leq x \leq 2$ ) is the number of electrons in the specified NBO. Lower orbital occupancy values are indicative of stronger delocalization.<sup>20</sup>

<sup>d</sup> Hybridization of a given NBO is of the form  $sp^\lambda$ , where  $\lambda = \left(\frac{\%p}{\%s}\right)$ .<sup>20</sup> Hybridizations with a very high value of  $\lambda$  (for example,  $sp^\infty$ ) have been denoted as non-applicable.

<sup>e</sup> Atomic orbital contributions denote the percent contribution of s, p, d, and f orbitals from atom A, and the percent contribution of s, p, d, and f orbitals from atom B, to their shared NBO  $\sigma_{AB}$  or  $\pi_{AB}$ .<sup>20</sup> Contributions from d and f orbitals are negligible and are omitted for simplicity. The percent contributions from each atom A ( $c_A^2 \times 100\%$ ) and B ( $c_B^2 \times 100\%$ ) to their shared NBO are also shown.

**Table S92.** NBO analysis<sup>a</sup> of (MeL3Me)<sub>2</sub>Zn with the O3LYP functional.

| NBO <sup>b</sup>  | Occupancy <sup>c</sup> | Hybridization <sup>d</sup>               | Atomic Orbital Contributions (%) <sup>e</sup>                                |
|-------------------|------------------------|------------------------------------------|------------------------------------------------------------------------------|
| Lone pair 1 (N1)  | 1.81331                | $sp^{2.45}$                              | $s(28.94\%)p(71.03\%)$                                                       |
| Lone pair 2 (N1)  | 1.60961                | n/a                                      | $s(0.05\%)p(99.90\%)$                                                        |
| $\sigma(N1-C5)$   | 1.98418                | $sp^{1.86}$ at N1<br>$sp^{2.22}$ at C5   | N1 (58.91%): $s(34.93\%)p(64.86\%)$<br>C5 (41.09%): $s(31.07\%)p(68.84\%)$   |
| $\sigma(N1-C11)$  | 1.98297                | $sp^{1.77}$ at N1<br>$sp^{2.07}$ at C11  | N1 (58.24%): $s(35.96\%)p(63.79\%)$<br>C11 (41.76%): $s(32.52\%)p(67.38\%)$  |
| $\sigma(C2-C5)$   | 1.97701                | $sp^{1.86}$ at C2<br>$sp^{1.87}$ at C5   | C2 (49.46%): $s(34.90\%)p(64.93\%)$<br>C5 (50.54%): $s(34.75\%)p(65.15\%)$   |
| $\sigma(C2-C6)$   | 1.98145                | $sp^{1.74}$ at C2<br>$sp^{1.76}$ at C6   | C2 (50.23%): $s(36.38\%)p(63.44\%)$<br>C6 (49.77%): $s(36.11\%)p(63.73\%)$   |
| $\pi(C2-C6)$      | 1.70459                | n/a                                      | C2 (51.79%): $s(0.01\%)p(99.93\%)$<br>C6 (48.21%): $s(0.00\%)p(99.93\%)$     |
| $\sigma(C3-C5)$   | 1.97720                | $sp^{1.84}$ at C3<br>$sp^{1.93}$ at C5   | C3 (49.30%): $s(35.16\%)p(64.67\%)$<br>C5 (50.70%): $s(34.08\%)p(65.82\%)$   |
| $\pi(C3-C5)$      | 1.62651                | n/a                                      | C3 (52.27%): $s(0.00\%)p(99.93\%)$<br>C5 (47.73%): $s(0.02\%)p(99.91\%)$     |
| $\sigma(C3-C7)$   | 1.98248                | $sp^{1.75}$ at C3<br>$sp^{1.78}$ at C7   | C3 (50.27%): $s(36.26\%)p(63.58\%)$<br>C7 (49.73%): $s(35.91\%)p(63.93\%)$   |
| $\sigma(C6-C8)$   | 1.98373                | $sp^{1.78}$ at C6<br>$sp^{1.81}$ at C8   | C6 (50.14%): $s(35.87\%)p(63.97\%)$<br>C8 (49.86%): $s(35.59\%)p(64.25\%)$   |
| $\sigma(C7-C8)$   | 1.98363                | $sp^{1.78}$ at C7<br>$sp^{1.80}$ at C8   | C7 (50.07%): $s(35.88\%)p(63.95\%)$<br>C8 (49.93%): $s(35.61\%)p(64.23\%)$   |
| $\pi(C7-C8)$      | 1.67436                | n/a                                      | C7 (48.27%): $s(0.00\%)p(99.94\%)$<br>C8 (51.73%): $s(0.00\%)p(99.94\%)$     |
| $\sigma(C11-C12)$ | 1.97638                | $sp^{1.77}$ at C11<br>$sp^{1.87}$ at C12 | C11 (51.02%): $s(36.10\%)p(63.80\%)$<br>C12 (48.98%): $s(34.84\%)p(65.00\%)$ |
| $\pi(C11-C12)$    | 1.63859                | n/a                                      | C11 (45.02%): $s(0.00\%)p(99.92\%)$<br>C12 (54.98%): $s(0.01\%)p(99.92\%)$   |
| $\sigma(C11-C10)$ | 1.97056                | $sp^{2.19}$ at C11<br>$sp^{1.95}$ at C10 | C11 (49.11%): $s(31.31\%)p(68.58\%)$<br>C10 (50.89%): $s(33.81\%)p(66.09\%)$ |
| Lone pair 1 (N4)  | 1.86463                | $sp^{2.64}$                              | $s(27.44\%)p(72.54\%)$                                                       |
| $\sigma(N4-C9)$   | 1.98742                | $sp^{1.59}$ at N4<br>$sp^{2.03}$ at C9   | N4 (59.40%): $s(38.41\%)p(61.25\%)$<br>C9 (40.60%): $s(32.94\%)p(66.95\%)$   |
| $\pi(N4-C9)$      | 1.85538                | n/a                                      | N4 (63.85%): $s(0.00\%)p(99.86\%)$<br>C9 (36.15%): $s(0.00\%)p(99.88\%)$     |
| $\sigma(N4-C10)$  | 1.98129                | $sp^{1.93}$ at N4<br>$sp^{2.31}$ at C10  | N4 (59.21%): $s(33.98\%)p(65.73\%)$<br>C10 (40.79%): $s(30.17\%)p(69.74\%)$  |

<sup>a</sup> Calculated in gas phase at the optimized S0 geometry using O3LYP (gas phase/ def2-tzvpp def2/j). The O3LYP functional uses 11.61 % Hartree-Fock exchange.<sup>21</sup>

<sup>b</sup> The general formulation of a sigma natural bond orbital (NBO) is  $\sigma_{AB} = c_A h_A + c_B h_B$ , where  $h_A$  and  $h_B$  are the atom-centered hybrid orbitals of atoms A and B, and  $c_A$  and  $c_B$  are the normalized polarization coefficients of atoms A and B. If the natural ionicity of an NBO, given by  $i_{AB} = \frac{(c_A^2 - c_B^2)}{(c_A^2 + c_B^2)}$ , exceeds a fixed limit ( $|i_{AB}| > 0.95$ ), this extremely polarized “bond” is identified instead as a lone pair.<sup>20</sup>

<sup>c</sup> Orbital occupancy ( $0 \leq x \leq 2$ ) is the number of electrons in the specified NBO. Lower orbital occupancy values are indicative of stronger delocalization.<sup>20</sup>

<sup>d</sup> Hybridization of a given NBO is of the form  $sp^\lambda$ , where  $\lambda = \left(\frac{\%p}{\%s}\right)$ .<sup>20</sup> Hybridizations with a very high value of  $\lambda$  (for example,  $sp^\infty$ ) have been denoted as non-applicable.

<sup>e</sup> Atomic orbital contributions denote the percent contribution of s, p, d, and f orbitals from atom A, and the percent contribution of s, p, d, and f orbitals from atom B, to their shared NBO  $\sigma_{AB}$  or  $\pi_{AB}$ .<sup>20</sup> Contributions from d and f orbitals are negligible and are omitted for simplicity. The percent contributions from each atom A ( $c_A^2 \times 100\%$ ) and B ( $c_B^2 \times 100\%$ ) to their shared NBO are also shown.

**Table S93.** NBO analysis<sup>a</sup> of (MeL3Me)<sub>2</sub>Zn with the B3LYP functional.

| NBO <sup>b</sup>  | Occupancy <sup>c</sup> | Hybridization <sup>d</sup>               | Atomic Orbital Contributions (%) <sup>e</sup>                                |
|-------------------|------------------------|------------------------------------------|------------------------------------------------------------------------------|
| Lone pair 1 (N1)  | 1.81718                | $sp^{2.49}$                              | $s(28.63\%)p(71.35\%)$                                                       |
| Lone pair 2 (N1)  | 1.62314                | n/a                                      | $s(0.04\%)p(99.91\%)$                                                        |
| $\sigma(N1-C5)$   | 1.98444                | $sp^{1.84}$ at N1<br>$sp^{2.21}$ at C5   | N1 (58.99%): $s(35.10\%)p(64.68\%)$<br>C5 (41.01%): $s(31.10\%)p(68.79\%)$   |
| $\sigma(N1-C11)$  | 1.98323                | $sp^{1.76}$ at N1<br>$sp^{2.07}$ at C11  | N1 (58.33%): $s(36.11\%)p(63.63\%)$<br>C11 (41.67%): $s(32.53\%)p(67.35\%)$  |
| $\sigma(C2-C5)$   | 1.97719                | $sp^{1.85}$ at C2<br>$sp^{1.88}$ at C5   | C2 (49.50%): $s(34.96\%)p(64.85\%)$<br>C5 (50.50%): $s(34.71\%)p(65.17\%)$   |
| $\sigma(C2-C6)$   | 1.98180                | $sp^{1.74}$ at C2<br>$sp^{1.76}$ at C6   | C2 (50.22%): $s(36.44\%)p(63.37\%)$<br>C6 (49.78%): $s(36.16\%)p(63.67\%)$   |
| $\pi(C2-C6)$      | 1.70428                | n/a                                      | C2 (51.97%): $s(0.01\%)p(99.93\%)$<br>C6 (48.03%): $s(0.00\%)p(99.93\%)$     |
| $\sigma(C3-C5)$   | 1.97753                | $sp^{1.83}$ at C3<br>$sp^{1.93}$ at C5   | C3 (49.32%): $s(35.22\%)p(64.59\%)$<br>C5 (50.68%): $s(34.07\%)p(65.81\%)$   |
| $\pi(C3-C5)$      | 1.62629                | n/a                                      | C3 (52.66%): $s(0.00\%)p(99.93\%)$<br>C5 (47.34%): $s(0.02\%)p(99.91\%)$     |
| $\sigma(C3-C7)$   | 1.98277                | $sp^{1.75}$ at C3<br>$sp^{1.78}$ at C7   | C3 (50.26%): $s(36.30\%)p(63.52\%)$<br>C7 (49.74%): $s(35.97\%)p(63.85\%)$   |
| $\sigma(C6-C8)$   | 1.98383                | $sp^{1.78}$ at C6<br>$sp^{1.80}$ at C8   | C6 (50.14%): $s(35.91\%)p(63.90\%)$<br>C8 (49.86%): $s(35.63\%)p(64.19\%)$   |
| $\sigma(C7-C8)$   | 1.98373                | $sp^{1.78}$ at C7<br>$sp^{1.80}$ at C8   | C7 (50.07%): $s(35.92\%)p(63.89\%)$<br>C8 (49.93%): $s(35.65\%)p(64.16\%)$   |
| $\pi(C7-C8)$      | 1.67507                | n/a                                      | C7 (48.09%): $s(0.00\%)p(99.94\%)$<br>C8 (51.91%): $s(0.00\%)p(99.94\%)$     |
| $\sigma(C11-C12)$ | 1.97670                | $sp^{1.77}$ at C11<br>$sp^{1.86}$ at C12 | C11 (51.00%): $s(36.08\%)p(63.81\%)$<br>C12 (49.00%): $s(34.90\%)p(64.91\%)$ |
| $\pi(C11-C12)$    | 1.64069                | n/a                                      | C11 (44.39%): $s(0.00\%)p(99.91\%)$<br>C12 (55.61%): $s(0.01\%)p(99.92\%)$   |
| $\sigma(C11-C10)$ | 1.97113                | $sp^{2.19}$ at C11<br>$sp^{1.95}$ at C10 | C11 (49.07%): $s(31.30\%)p(68.57\%)$<br>C10 (50.93%): $s(33.83\%)p(66.06\%)$ |
| Lone pair 1 (N4)  | 1.86992                | $sp^{2.70}$                              | $s(27.02\%)p(72.97\%)$                                                       |
| $\sigma(N4-C9)$   | 1.98740                | $sp^{1.58}$ at N4<br>$sp^{2.03}$ at C9   | N4 (59.49%): $s(38.58\%)p(61.07\%)$<br>C9 (40.51%): $s(32.94\%)p(66.94\%)$   |
| $\pi(N4-C9)$      | 1.85774                | n/a                                      | N4 (64.00%): $s(0.00\%)p(99.86\%)$<br>C9 (36.00%): $s(0.00\%)p(99.88\%)$     |
| $\sigma(N4-C10)$  | 1.98159                | $sp^{1.91}$ at N4<br>$sp^{2.31}$ at C10  | N4 (59.39%): $s(34.24\%)p(65.46\%)$<br>C10 (40.61%): $s(30.15\%)p(69.74\%)$  |

<sup>a</sup> Calculated in gas phase at the optimized S0 geometry using B3LYP (gas phase/ def2-tzvpp def2/j). The B3LYP functional uses 20 % Hartree-Fock exchange.<sup>22</sup>

<sup>b</sup> The general formulation of a sigma natural bond orbital (NBO) is  $\sigma_{AB} = c_A h_A + c_B h_B$ , where  $h_A$  and  $h_B$  are the atom-centered hybrid orbitals of atoms A and B, and  $c_A$  and  $c_B$  are the normalized polarization coefficients of atoms A and B. If the natural ionicity of an NBO, given by  $i_{AB} = \frac{(c_A^2 - c_B^2)}{(c_A^2 + c_B^2)}$ , exceeds a fixed limit ( $|i_{AB}| > 0.95$ ), this extremely polarized “bond” is identified instead as a lone pair.<sup>20</sup>

<sup>c</sup> Orbital occupancy ( $0 \leq x \leq 2$ ) is the number of electrons in the specified NBO. Lower orbital occupancy values are indicative of stronger delocalization.<sup>20</sup>

<sup>d</sup> Hybridization of a given NBO is of the form  $sp^\lambda$ , where  $\lambda = \left(\frac{\%p}{\%s}\right)$ .<sup>20</sup> Hybridizations with a very high value of  $\lambda$  (for example,  $sp^\infty$ ) have been denoted as non-applicable.

<sup>e</sup> Atomic orbital contributions denote the percent contribution of s, p, d, and f orbitals from atom A, and the percent contribution of s, p, d, and f orbitals from atom B, to their shared NBO  $\sigma_{AB}$  or  $\pi_{AB}$ .<sup>20</sup> Contributions from d and f orbitals are negligible and are omitted for simplicity. The percent contributions from each atom A ( $c_A^2 \times 100\%$ ) and B ( $c_B^2 \times 100\%$ ) to their shared NBO are also shown.

**Table S94.** NBO analysis<sup>a</sup> of (MeL3Me)<sub>2</sub>Zn with the PBE0 functional.

| NBO <sup>b</sup>  | Occupancy <sup>c</sup> | Hybridization <sup>d</sup>               | Atomic Orbital Contributions (%) <sup>e</sup>                                |
|-------------------|------------------------|------------------------------------------|------------------------------------------------------------------------------|
| Lone pair 1 (N1)  | 1.82096                | $sp^{2.50}$                              | $s(28.56\%)p(71.41\%)$                                                       |
| Lone pair 2 (N1)  | 1.62756                | n/a                                      | $s(0.05\%)p(99.90\%)$                                                        |
| $\sigma(N1-C5)$   | 1.98460                | $sp^{1.84}$ at N1<br>$sp^{2.21}$ at C5   | N1 (58.95%): $s(35.14\%)p(64.63\%)$<br>C5 (41.05%): $s(31.10\%)p(68.80\%)$   |
| $\sigma(N1-C11)$  | 1.98335                | $sp^{1.76}$ at N1<br>$sp^{2.07}$ at C11  | N1 (58.27%): $s(36.13\%)p(63.61\%)$<br>C11 (41.73%): $s(32.54\%)p(67.34\%)$  |
| $\sigma(C2-C5)$   | 1.97746                | $sp^{1.86}$ at C2<br>$sp^{1.88}$ at C5   | C2 (49.52%): $s(34.94\%)p(64.87\%)$<br>C5 (50.48%): $s(34.71\%)p(65.17\%)$   |
| $\sigma(C2-C6)$   | 1.98190                | $sp^{1.74}$ at C2<br>$sp^{1.76}$ at C6   | C2 (50.23%): $s(36.37\%)p(63.44\%)$<br>C6 (49.77%): $s(36.12\%)p(63.71\%)$   |
| $\pi(C2-C6)$      | 1.70396                | n/a                                      | C2 (52.01%): $s(0.01\%)p(99.93\%)$<br>C6 (47.99%): $s(0.00\%)p(99.93\%)$     |
| $\sigma(C3-C5)$   | 1.97777                | $sp^{1.84}$ at C3<br>$sp^{1.93}$ at C5   | C3 (49.34%): $s(35.20\%)p(64.62\%)$<br>C5 (50.66%): $s(34.07\%)p(65.81\%)$   |
| $\pi(C3-C5)$      | 1.62672                | n/a                                      | C3 (52.66%): $s(0.00\%)p(99.93\%)$<br>C5 (47.34%): $s(0.02\%)p(99.91\%)$     |
| $\sigma(C3-C7)$   | 1.98289                | $sp^{1.75}$ at C3<br>$sp^{1.78}$ at C7   | C3 (50.27%): $s(36.24\%)p(63.57\%)$<br>C7 (49.73%): $s(35.93\%)p(63.90\%)$   |
| $\sigma(C6-C8)$   | 1.98407                | $sp^{1.78}$ at C6<br>$sp^{1.81}$ at C8   | C6 (50.14%): $s(35.86\%)p(63.96\%)$<br>C8 (49.86%): $s(35.59\%)p(64.24\%)$   |
| $\sigma(C7-C8)$   | 1.98396                | $sp^{1.78}$ at C7<br>$sp^{1.80}$ at C8   | C7 (50.07%): $s(35.87\%)p(63.95\%)$<br>C8 (49.93%): $s(35.61\%)p(64.21\%)$   |
| $\pi(C7-C8)$      | 1.67481                | n/a                                      | C7 (48.07%): $s(0.00\%)p(99.93\%)$<br>C8 (51.93%): $s(0.00\%)p(99.94\%)$     |
| $\sigma(C11-C12)$ | 1.97682                | $sp^{1.77}$ at C11<br>$sp^{1.86}$ at C12 | C11 (50.98%): $s(36.09\%)p(63.80\%)$<br>C12 (49.02%): $s(34.87\%)p(64.94\%)$ |
| $\pi(C11-C12)$    | 1.64185                | n/a                                      | C11 (44.36%): $s(0.00\%)p(99.91\%)$<br>C12 (55.64%): $s(0.01\%)p(99.91\%)$   |
| $\sigma(C11-C10)$ | 1.97129                | $sp^{2.19}$ at C11<br>$sp^{1.95}$ at C10 | C11 (49.05%): $s(31.29\%)p(68.59\%)$<br>C10 (50.95%): $s(33.84\%)p(66.05\%)$ |
| Lone pair 1 (N4)  | 1.87152                | $sp^{2.69}$                              | $s(27.09\%)p(72.90\%)$                                                       |
| $\sigma(N4-C9)$   | 1.98761                | $sp^{1.58}$ at N4<br>$sp^{2.03}$ at C9   | N4 (59.45%): $s(38.56\%)p(61.08\%)$<br>C9 (40.55%): $s(32.97\%)p(66.92\%)$   |
| $\pi(N4-C9)$      | 1.85875                | n/a                                      | N4 (64.10%): $s(0.00\%)p(99.85\%)$<br>C9 (35.90%): $s(0.00\%)p(99.87\%)$     |
| $\sigma(N4-C10)$  | 1.98169                | $sp^{1.92}$ at N4<br>$sp^{2.31}$ at C10  | N4 (59.28%): $s(34.19\%)p(65.50\%)$<br>C10 (40.72%): $s(30.15\%)p(69.76\%)$  |

<sup>a</sup> Calculated in gas phase at the optimized S0 geometry using PBE0 (gas phase/ def2-tzvpp def2/j). The PBE0 functional uses 25 % Hartree-Fock exchange.<sup>14</sup>

<sup>b</sup> The general formulation of a sigma natural bond orbital (NBO) is  $\sigma_{AB} = c_A h_A + c_B h_B$ , where  $h_A$  and  $h_B$  are the atom-centered hybrid orbitals of atoms A and B, and  $c_A$  and  $c_B$  are the normalized polarization coefficients of atoms A and B. If the natural ionicity of an NBO, given by  $i_{AB} = \frac{(c_A^2 - c_B^2)}{(c_A^2 + c_B^2)}$ , exceeds a fixed limit ( $|i_{AB}| > 0.95$ ), this extremely polarized “bond” is identified instead as a lone pair.<sup>20</sup>

<sup>c</sup> Orbital occupancy ( $0 \leq x \leq 2$ ) is the number of electrons in the specified NBO. Lower orbital occupancy values are indicative of stronger delocalization.<sup>20</sup>

<sup>d</sup> Hybridization of a given NBO is of the form  $sp^\lambda$ , where  $\lambda = (\frac{\%p}{\%s})$ .<sup>20</sup> Hybridizations with a very high value of  $\lambda$  (for example,  $sp^\infty$ ) have been denoted as non-applicable.

<sup>e</sup> Atomic orbital contributions denote the percent contribution of s, p, d, and f orbitals from atom A, and the percent contribution of s, p, d, and f orbitals from atom B, to their shared NBO  $\sigma_{AB}$  or  $\pi_{AB}$ .<sup>20</sup> Contributions from d and f orbitals are negligible and are omitted for simplicity. The percent contributions from each atom A ( $c_A^2 \times 100\%$ ) and B ( $c_B^2 \times 100\%$ ) to their shared NBO are also shown.

**Table S95.** NBO analysis<sup>a</sup> of (MeL3Me)<sub>2</sub>Zn with the M06 functional.

| NBO <sup>b</sup>  | Occupancy <sup>c</sup> | Hybridization <sup>d</sup>               | Atomic Orbital Contributions (%) <sup>e</sup>                                |
|-------------------|------------------------|------------------------------------------|------------------------------------------------------------------------------|
| Lone pair 1 (N1)  | 1.81339                | $sp^{2.48}$                              | $s(28.75\%)p(71.22\%)$                                                       |
| Lone pair 2 (N1)  | 1.63612                | n/a                                      | $s(0.05\%)p(99.88\%)$                                                        |
| $\sigma(N1-C5)$   | 1.98429                | $sp^{1.84}$ at N1<br>$sp^{2.22}$ at C5   | N1 (59.29%): $s(35.09\%)p(64.71\%)$<br>C5 (40.71%): $s(31.07\%)p(68.84\%)$   |
| $\sigma(N1-C11)$  | 1.98316                | $sp^{1.77}$ at N1<br>$sp^{2.07}$ at C11  | N1 (58.55%): $s(35.99\%)p(63.80\%)$<br>C11 (41.45%): $s(32.50\%)p(67.41\%)$  |
| $\sigma(C2-C5)$   | 1.97663                | $sp^{1.85}$ at C2<br>$sp^{1.88}$ at C5   | C2 (49.60%): $s(35.09\%)p(64.75\%)$<br>C5 (50.40%): $s(34.72\%)p(65.18\%)$   |
| $\sigma(C2-C6)$   | 1.98154                | $sp^{1.74}$ at C2<br>$sp^{1.76}$ at C6   | C2 (50.19%): $s(36.41\%)p(63.42\%)$<br>C6 (49.81%): $s(36.24\%)p(63.62\%)$   |
| $\pi(C2-C6)$      | 1.70394                | n/a                                      | C2 (52.29%): $s(0.01\%)p(99.92\%)$<br>C6 (47.71%): $s(0.00\%)p(99.92\%)$     |
| $\sigma(C3-C5)$   | 1.97705                | $sp^{1.82}$ at C3<br>$sp^{1.93}$ at C5   | C3 (49.42%): $s(35.35\%)p(64.48\%)$<br>C5 (50.58%): $s(34.10\%)p(65.79\%)$   |
| $\pi(C3-C5)$      | 1.62726                | n/a                                      | C3 (53.03%): $s(0.00\%)p(99.93\%)$<br>C5 (46.97%): $s(0.02\%)p(99.91\%)$     |
| $\sigma(C3-C7)$   | 1.98255                | $sp^{1.75}$ at C3<br>$sp^{1.77}$ at C7   | C3 (50.21%): $s(36.27\%)p(63.57\%)$<br>C7 (49.79%): $s(36.06\%)p(63.79\%)$   |
| $\sigma(C6-C8)$   | 1.98350                | $sp^{1.78}$ at C6<br>$sp^{1.80}$ at C8   | C6 (50.15%): $s(35.93\%)p(63.91\%)$<br>C8 (49.85%): $s(35.66\%)p(64.18\%)$   |
| $\sigma(C7-C8)$   | 1.98340                | $sp^{1.78}$ at C7<br>$sp^{1.80}$ at C8   | C7 (50.08%): $s(35.93\%)p(63.90\%)$<br>C8 (49.92%): $s(35.69\%)p(64.16\%)$   |
| $\pi(C7-C8)$      | 1.67434                | n/a                                      | C7 (47.86%): $s(0.00\%)p(99.93\%)$<br>C8 (52.14%): $s(0.00\%)p(99.93\%)$     |
| $\sigma(C11-C12)$ | 1.97641                | $sp^{1.77}$ at C11<br>$sp^{1.85}$ at C12 | C11 (50.91%): $s(36.07\%)p(63.83\%)$<br>C12 (49.09%): $s(34.98\%)p(64.85\%)$ |
| $\pi(C11-C12)$    | 1.64266                | n/a                                      | C11 (43.57%): $s(0.01\%)p(99.90\%)$<br>C12 (56.43%): $s(0.01\%)p(99.91\%)$   |
| $\sigma(C11-C10)$ | 1.97079                | $sp^{2.19}$ at C11<br>$sp^{1.95}$ at C10 | C11 (49.08%): $s(31.35\%)p(68.53\%)$<br>C10 (50.92%): $s(33.86\%)p(66.03\%)$ |
| Lone pair 1 (N4)  | 1.86836                | $sp^{2.69}$                              | $s(27.08\%)p(72.90\%)$                                                       |
| $\sigma(N4-C9)$   | 1.98740                | $sp^{1.59}$ at N4<br>$sp^{2.03}$ at C9   | N4 (59.66%): $s(38.50\%)p(61.21\%)$<br>C9 (40.34%): $s(32.96\%)p(66.95\%)$   |
| $\pi(N4-C9)$      | 1.86262                | n/a                                      | N4 (64.73%): $s(0.00\%)p(99.83\%)$<br>C9 (35.27%): $s(0.00\%)p(99.85\%)$     |
| $\sigma(N4-C10)$  | 1.98155                | $sp^{1.91}$ at N4<br>$sp^{2.32}$ at C10  | N4 (59.61%): $s(34.28\%)p(65.46\%)$<br>C10 (40.39%): $s(30.08\%)p(69.84\%)$  |

<sup>a</sup> Calculated in gas phase at the optimized S0 geometry using M06 (gas phase/ def2-tzvpp def2/j). The M06 functional uses 27 % Hartree-Fock exchange.<sup>23</sup>

<sup>b</sup> The general formulation of a sigma natural bond orbital (NBO) is  $\sigma_{AB} = c_A h_A + c_B h_B$ , where  $h_A$  and  $h_B$  are the atom-centered hybrid orbitals of atoms A and B, and  $c_A$  and  $c_B$  are the normalized polarization coefficients of atoms A and B. If the natural ionicity of an NBO, given by  $i_{AB} = \frac{(c_A^2 - c_B^2)}{(c_A^2 + c_B^2)}$ , exceeds a fixed limit ( $|i_{AB}| > 0.95$ ), this extremely polarized “bond” is identified instead as a lone pair.<sup>20</sup>

<sup>c</sup> Orbital occupancy ( $0 \leq x \leq 2$ ) is the number of electrons in the specified NBO. Lower orbital occupancy values are indicative of stronger delocalization.<sup>20</sup>

<sup>d</sup> Hybridization of a given NBO is of the form  $sp^\lambda$ , where  $\lambda = (\frac{\%p}{\%s})$ .<sup>20</sup> Hybridizations with a very high value of  $\lambda$  (for example,  $sp^\infty$ ) have been denoted as non-applicable.

<sup>e</sup> Atomic orbital contributions denote the percent contribution of s, p, d, and f orbitals from atom A, and the percent contribution of s, p, d, and f orbitals from atom B, to their shared NBO  $\sigma_{AB}$  or  $\pi_{AB}$ .<sup>20</sup> Contributions from d and f orbitals are negligible and are omitted for simplicity. The percent contributions from each atom A ( $c_A^2 \times 100\%$ ) and B ( $c_B^2 \times 100\%$ ) to their shared NBO are also shown.

**Table S96.** NBO analysis<sup>a</sup> of (MeL3Me)<sub>2</sub>Zn with the M06-2X functional.

| NBO <sup>b</sup>  | Occupancy <sup>c</sup> | Hybridization <sup>d</sup>               | Atomic Orbital Contributions (%) <sup>e</sup>                                |
|-------------------|------------------------|------------------------------------------|------------------------------------------------------------------------------|
| Lone pair 1 (N1)  | 1.84154                | $sp^{2.57}$                              | $s(28.04\%)p(71.93\%)$                                                       |
| Lone pair 2 (N1)  | 1.64418                | n/a                                      | $s(0.03\%)p(99.91\%)$                                                        |
| $\sigma(N1-C5)$   | 1.98461                | $sp^{1.81}$ at N1<br>$sp^{2.21}$ at C5   | N1 (59.00%): $s(35.47\%)p(64.31\%)$<br>C5 (41.00%): $s(31.13\%)p(68.79\%)$   |
| $\sigma(N1-C11)$  | 1.98320                | $sp^{1.74}$ at N1<br>$sp^{2.07}$ at C11  | N1 (58.32%): $s(36.35\%)p(63.40\%)$<br>C11 (41.68%): $s(32.56\%)p(67.34\%)$  |
| $\sigma(C2-C5)$   | 1.97761                | $sp^{1.85}$ at C2<br>$sp^{1.83}$ at C5   | C2 (49.52%): $s(34.98\%)p(64.85\%)$<br>C5 (50.48%): $s(34.70\%)p(65.20\%)$   |
| $\sigma(C2-C6)$   | 1.98221                | $sp^{1.75}$ at C2<br>$sp^{1.76}$ at C6   | C2 (50.23%): $s(36.36\%)p(63.46\%)$<br>C6 (49.77%): $s(36.13\%)p(63.71\%)$   |
| $\pi(C2-C6)$      | 1.70318                | n/a                                      | C2 (52.11%): $s(0.01\%)p(99.93\%)$<br>C6 (47.89%): $s(0.00\%)p(99.93\%)$     |
| $\sigma(C3-C5)$   | 1.97799                | $sp^{1.83}$ at C3<br>$sp^{1.93}$ at C5   | C3 (49.31%): $s(35.23\%)p(64.60\%)$<br>C5 (50.69%): $s(34.07\%)p(65.82\%)$   |
| $\pi(C3-C5)$      | 1.62827                | n/a                                      | C3 (52.91%): $s(0.00\%)p(99.93\%)$<br>C5 (47.09%): $s(0.02\%)p(99.92\%)$     |
| $\sigma(C3-C7)$   | 1.98313                | $sp^{1.76}$ at C3<br>$sp^{1.78}$ at C7   | C3 (50.26%): $s(36.22\%)p(63.61\%)$<br>C7 (49.74%): $s(35.95\%)p(63.89\%)$   |
| $\sigma(C6-C8)$   | 1.98421                | $sp^{1.78}$ at C6<br>$sp^{1.81}$ at C8   | C6 (50.14%): $s(35.85\%)p(63.97\%)$<br>C8 (49.86%): $s(35.58\%)p(64.26\%)$   |
| $\sigma(C7-C8)$   | 1.98408                | $sp^{1.78}$ at C7<br>$sp^{1.80}$ at C8   | C7 (50.07%): $s(35.85\%)p(63.97\%)$<br>C8 (49.93%): $s(35.60\%)p(64.23\%)$   |
| $\pi(C7-C8)$      | 1.67559                | n/a                                      | C7 (47.97%): $s(0.00\%)p(99.94\%)$<br>C8 (52.03%): $s(0.00\%)p(99.94\%)$     |
| $\sigma(C11-C12)$ | 1.97716                | $sp^{1.77}$ at C11<br>$sp^{1.86}$ at C12 | C11 (51.02%): $s(36.13\%)p(63.77\%)$<br>C12 (48.98%): $s(34.88\%)p(64.94\%)$ |
| $\pi(C11-C12)$    | 1.64551                | n/a                                      | C11 (43.87%): $s(0.01\%)p(99.91\%)$<br>C12 (56.13%): $s(0.01\%)p(99.91\%)$   |
| $\sigma(C11-C10)$ | 1.97182                | $sp^{2.20}$ at C11<br>$sp^{1.95}$ at C10 | C11 (48.96%): $s(31.24\%)p(68.64\%)$<br>C10 (51.04%): $s(33.87\%)p(66.03\%)$ |
| Lone pair 1 (N4)  | 1.88574                | $sp^{2.77}$                              | $s(26.55\%)p(73.43\%)$                                                       |
| $\sigma(N4-C9)$   | 1.98749                | $sp^{1.57}$ at N4<br>$sp^{2.04}$ at C9   | N4 (59.61%): $s(38.83\%)p(60.82\%)$<br>C9 (40.39%): $s(32.91\%)p(66.99\%)$   |
| $\pi(N4-C9)$      | 1.86514                | n/a                                      | N4 (63.91%): $s(0.00\%)p(99.83\%)$<br>C9 (36.09%): $s(0.00\%)p(99.86\%)$     |
| $\sigma(N4-C10)$  | 1.98158                | $sp^{1.89}$ at N4<br>$sp^{2.32}$ at C10  | N4 (59.50%): $s(34.47\%)p(65.23\%)$<br>C10 (40.50%): $s(30.10\%)p(69.82\%)$  |

<sup>a</sup> Calculated in gas phase at the optimized S0 geometry using M06-2X (gas phase/ def2-tzvpp def2/j). The M06-2X functional uses 54 % Hartree-Fock exchange.<sup>23</sup>

<sup>b</sup> The general formulation of a sigma natural bond orbital (NBO) is  $\sigma_{AB} = c_A h_A + c_B h_B$ , where  $h_A$  and  $h_B$  are the atom-centered hybrid orbitals of atoms A and B, and  $c_A$  and  $c_B$  are the normalized polarization coefficients of atoms A and B. If the natural ionicity of an NBO, given by  $i_{AB} = \frac{(c_A^2 - c_B^2)}{(c_A^2 + c_B^2)}$ , exceeds a fixed limit ( $|i_{AB}| > 0.95$ ), this extremely polarized “bond” is identified instead as a lone pair.<sup>20</sup>

<sup>c</sup> Orbital occupancy ( $0 \leq x \leq 2$ ) is the number of electrons in the specified NBO. Lower orbital occupancy values are indicative of stronger delocalization.<sup>20</sup>

<sup>d</sup> Hybridization of a given NBO is of the form  $sp^\lambda$ , where  $\lambda = (\frac{\%p}{\%s})$ .<sup>20</sup> Hybridizations with a very high value of  $\lambda$  (for example,  $sp^\infty$ ) have been denoted as non-applicable.

<sup>e</sup> Atomic orbital contributions denote the percent contribution of s, p, d, and f orbitals from atom A, and the percent contribution of s, p, d, and f orbitals from atom B, to their shared NBO  $\sigma_{AB}$  or  $\pi_{AB}$ .<sup>20</sup> Contributions from d and f orbitals are negligible and are omitted for simplicity. The percent contributions from each atom A ( $c_A^2 \times 100\%$ ) and B ( $c_B^2 \times 100\%$ ) to their shared NBO are also shown.

**Table S97.** NBO analysis<sup>a</sup> of (MeL3Me)<sub>2</sub>Zn with the CAM-B3LYP functional.

| NBO <sup>b</sup>  | Occupancy <sup>c</sup> | Hybridization <sup>d</sup>               | Atomic Orbital Contributions (%) <sup>e</sup>                                |
|-------------------|------------------------|------------------------------------------|------------------------------------------------------------------------------|
| Lone pair 1 (N1)  | 1.82481                | $sp^{2.61}$                              | $s(27.72\%)p(72.25\%)$                                                       |
| Lone pair 2 (N1)  | 1.64981                | n/a                                      | $s(0.04\%)p(99.91\%)$                                                        |
| $\sigma(N1-C5)$   | 1.98489                | $sp^{1.80}$ at N1<br>$sp^{2.21}$ at C5   | N1 (58.95%): $s(35.59\%)p(64.17\%)$<br>C5 (41.05%): $s(31.10\%)p(68.79\%)$   |
| $\sigma(N1-C11)$  | 1.98347                | $sp^{1.73}$ at N1<br>$sp^{2.07}$ at C11  | N1 (58.27%): $s(36.53\%)p(63.20\%)$<br>C11 (41.73%): $s(32.53\%)p(67.35\%)$  |
| $\sigma(C2-C5)$   | 1.97768                | $sp^{1.85}$ at C2<br>$sp^{1.88}$ at C5   | C2 (49.54%): $s(34.97\%)p(64.83\%)$<br>C5 (50.46%): $s(34.71\%)p(65.17\%)$   |
| $\sigma(C2-C6)$   | 1.98188                | $sp^{1.74}$ at C2<br>$sp^{1.76}$ at C6   | C2 (50.22%): $s(36.42\%)p(63.39\%)$<br>C6 (49.78%): $s(36.14\%)p(63.69\%)$   |
| $\pi(C2-C6)$      | 1.70280                | n/a                                      | C2 (52.21%): $s(0.01\%)p(99.93\%)$<br>C6 (47.79%): $s(0.00\%)p(99.93\%)$     |
| $\sigma(C3-C5)$   | 1.97804                | $sp^{1.83}$ at C3<br>$sp^{1.93}$ at C5   | C3 (49.35%): $s(35.23\%)p(64.57\%)$<br>C5 (50.65%): $s(34.06\%)p(65.82\%)$   |
| $\pi(C3-C5)$      | 1.62675                | n/a                                      | C3 (53.12%): $s(0.00\%)p(99.92\%)$<br>C5 (46.88%): $s(0.02\%)p(99.91\%)$     |
| $\sigma(C3-C7)$   | 1.98279                | $sp^{1.75}$ at C3<br>$sp^{1.78}$ at C7   | C3 (50.25%): $s(36.27\%)p(63.54\%)$<br>C7 (49.75%): $s(35.95\%)p(63.87\%)$   |
| $\sigma(C6-C8)$   | 1.98382                | $sp^{1.78}$ at C6<br>$sp^{1.80}$ at C8   | C6 (50.14%): $s(35.89\%)p(63.92\%)$<br>C8 (49.86%): $s(35.61\%)p(64.21\%)$   |
| $\sigma(C7-C8)$   | 1.98375                | $sp^{1.78}$ at C7<br>$sp^{1.80}$ at C8   | C7 (50.07%): $s(35.89\%)p(63.91\%)$<br>C8 (49.93%): $s(35.63\%)p(64.18\%)$   |
| $\pi(C7-C8)$      | 1.67613                | n/a                                      | C7 (47.86%): $s(0.00\%)p(99.93\%)$<br>C8 (52.14%): $s(0.00\%)p(99.94\%)$     |
| $\sigma(C11-C12)$ | 1.97692                | $sp^{1.77}$ at C11<br>$sp^{1.86}$ at C12 | C11 (50.98%): $s(36.11\%)p(63.78\%)$<br>C12 (49.02%): $s(34.91\%)p(64.89\%)$ |
| $\pi(C11-C12)$    | 1.64732                | n/a                                      | C11 (43.43%): $s(0.00\%)p(99.90\%)$<br>C12 (56.57%): $s(0.01\%)p(99.91\%)$   |
| $\sigma(C11-C10)$ | 1.97197                | $sp^{2.19}$ at C11<br>$sp^{1.95}$ at C10 | C11 (49.00%): $s(31.27\%)p(68.60\%)$<br>C10 (51.00%): $s(33.88\%)p(66.00\%)$ |
| Lone pair 1 (N4)  | 1.87689                | $sp^{2.80}$                              | $s(26.31\%)p(73.67\%)$                                                       |
| $\sigma(N4-C9)$   | 1.98743                | $sp^{1.56}$ at N4<br>$sp^{2.03}$ at C9   | N4 (59.48%): $s(38.90\%)p(60.74\%)$<br>C9 (40.52%): $s(32.92\%)p(66.96\%)$   |
| $\pi(N4-C9)$      | 1.86648                | n/a                                      | N4 (64.21%): $s(0.00\%)p(99.85\%)$<br>C9 (35.79%): $s(0.00\%)p(99.86\%)$     |
| $\sigma(N4-C10)$  | 1.98189                | $sp^{1.88}$ at N4<br>$sp^{2.32}$ at C10  | N4 (59.43%): $s(34.63\%)p(65.05\%)$<br>C10 (40.57%): $s(30.08\%)p(69.82\%)$  |

<sup>a</sup> Calculated in gas phase at the optimized S0 geometry using CAM-B3LYP (gas phase/ def2-tzvpp def2/j). The CAM-B3LYP functional is a range-separated functional, and uses 19 % Hartree-Fock exchange at short range, 33 % Hartree-Fock exchange at intermediate range, and 65 % Hartree-Fock exchange at long range.<sup>15</sup>

<sup>b</sup> The general formulation of a sigma natural bond orbital (NBO) is  $\sigma_{AB} = c_A h_A + c_B h_B$ , where  $h_A$  and  $h_B$  are the atom-centered hybrid orbitals of atoms A and B, and  $c_A$  and  $c_B$  are the normalized polarization coefficients of atoms A and B. If the natural ionicity of an NBO, given by  $i_{AB} = \frac{(c_A^2 - c_B^2)}{(c_A^2 + c_B^2)}$ , exceeds a fixed limit ( $|i_{AB}| > 0.95$ ), this extremely polarized “bond” is identified instead as a lone pair.<sup>20</sup>

<sup>c</sup> Orbital occupancy ( $0 \leq x \leq 2$ ) is the number of electrons in the specified NBO. Lower orbital occupancy values are indicative of stronger delocalization.<sup>20</sup>

<sup>d</sup> Hybridization of a given NBO is of the form  $sp^\lambda$ , where  $\lambda = \left(\frac{\%p}{\%s}\right)$ .<sup>20</sup> Hybridizations with a very high value of  $\lambda$  (for example,  $sp^\infty$ ) have been denoted as non-applicable.

<sup>e</sup> Atomic orbital contributions denote the percent contribution of s, p, d, and f orbitals from atom A, and the percent contribution of s, p, d, and f orbitals from atom B, to their shared NBO  $\sigma_{AB}$  or  $\pi_{AB}$ .<sup>20</sup> Contributions from d and f orbitals are negligible and are omitted for simplicity. The percent contributions from each atom A ( $c_A^2 \times 100\%$ ) and B ( $c_B^2 \times 100\%$ ) to their shared NBO are also shown.

**Table S98.** NBO analysis<sup>a</sup> of (CF<sub>3</sub>L4)<sub>2</sub>Zn with the M06-L functional.

| NBO <sup>b</sup>  | Occupancy <sup>c</sup> | Hybridization <sup>d</sup>               | Atomic Orbital Contributions (%) <sup>e</sup>                                |
|-------------------|------------------------|------------------------------------------|------------------------------------------------------------------------------|
| Lone pair 1 (N1)  | 1.84126                | $sp^{2.35}$                              | $s(29.86\%)p(70.11\%)$                                                       |
| $\sigma(N1-C5)$   | 1.98732                | $sp^{1.63}$ at N1<br>$sp^{2.01}$ at C5   | N1 (59.81%): $s(37.86\%)p(61.84\%)$<br>C5 (40.19%): $s(33.19\%)p(66.72\%)$   |
| $\pi(N1-C5)$      | 1.85812                | n/a                                      | N1 (70.41%): $s(0.08\%)p(99.78\%)$<br>C5 (29.59%): $s(0.13\%)p(99.70\%)$     |
| $\sigma(N1-C11)$  | 1.98192                | $sp^{2.11}$ at N1<br>$sp^{2.15}$ at C11  | N1 (58.27%): $s(32.05\%)p(67.68\%)$<br>C11 (41.73%): $s(31.71\%)p(68.21\%)$  |
| $\sigma(C2-C5)$   | 1.98404                | $sp^{2.85}$ at C2<br>$sp^{2.18}$ at C5   | C2 (51.83%): $s(25.91\%)p(73.94\%)$<br>C5 (48.17%): $s(31.45\%)p(68.48\%)$   |
| $\sigma(C3-C5)$   | 1.97761                | $sp^{1.83}$ at C3<br>$sp^{1.84}$ at C5   | C3 (49.98%): $s(35.22\%)p(64.59\%)$<br>C5 (50.02%): $s(35.21\%)p(64.71\%)$   |
| $\sigma(C3-C6)$   | 1.98633                | $sp^{1.90}$ at C3<br>$sp^{1.67}$ at C6   | C3 (51.52%): $s(34.36\%)p(65.45\%)$<br>C6 (48.48%): $s(37.38\%)p(62.52\%)$   |
| $\pi(C3-C6)$      | 1.63358                | n/a                                      | C3 (67.89%): $s(0.01\%)p(99.91\%)$<br>C6 (32.11%): $s(0.02\%)p(99.88\%)$     |
| $\sigma(C6-C8)$   | 1.98547                | $sp^{2.16}$ at C6<br>$sp^{2.92}$ at C8   | C6 (47.50%): $s(31.59\%)p(68.32\%)$<br>C8 (52.50%): $s(25.48\%)p(74.36\%)$   |
| $\sigma(C6-O7)$   | 1.99359                | $sp^{2.21}$ at C6<br>$sp^{1.73}$ at O7   | C6 (35.13%): $s(31.09\%)p(68.81\%)$<br>O7 (64.87%): $s(36.44\%)p(63.12\%)$   |
| Lone pair 1 (O7)  | 1.95984                | n/a                                      | $s(58.05\%)p(41.88\%)$                                                       |
| Lone pair 2 (O7)  | 1.88638                | n/a                                      | $s(5.46\%)p(94.41\%)$                                                        |
| Lone pair 3 (O7)  | 1.57135                | n/a                                      | $s(0.01\%)p(99.78\%)$                                                        |
| $\sigma(C11-C12)$ | 1.97730                | $sp^{1.78}$ at C11<br>$sp^{1.90}$ at C12 | C11 (49.98%): $s(35.93\%)p(63.97\%)$<br>C12 (50.02%): $s(34.44\%)p(65.39\%)$ |
| $\pi(C11-C12)$    | 1.64782                | n/a                                      | C11 (46.63%): $s(0.01\%)p(99.90\%)$<br>C12 (53.37%): $s(0.02\%)p(99.90\%)$   |
| $\sigma(C11-C10)$ | 1.97462                | $sp^{2.09}$ at C11<br>$sp^{1.94}$ at C10 | C11 (49.39%): $s(32.28\%)p(67.60\%)$<br>C10 (50.61%): $s(33.92\%)p(65.94\%)$ |
| Lone pair 1 (N4)  | 1.88662                | $sp^{2.16}$                              | $s(31.67\%)p(68.25\%)$                                                       |
| $\sigma(N4-C9)$   | 1.98633                | $sp^{1.72}$ at N4<br>$sp^{1.95}$ at C9   | N4 (59.00%): $s(36.59\%)p(63.09\%)$<br>C9 (41.00%): $s(33.86\%)p(66.04\%)$   |
| $\pi(N4-C9)$      | 1.84619                | n/a                                      | N4 (61.90%): $s(0.01\%)p(99.82\%)$<br>C9 (38.10%): $s(0.01\%)p(99.85\%)$     |
| $\sigma(N4-C10)$  | 1.98145                | $sp^{2.15}$ at N4<br>$sp^{2.31}$ at C10  | N4 (58.48%): $s(31.61\%)p(68.09\%)$<br>C10 (41.52%): $s(30.17\%)p(69.75\%)$  |

<sup>a</sup> Calculated in gas phase at the optimized S0 geometry using M06-L (gas phase/ def2-tzvp def2/j). The M06-L functional uses 0 % Hartree-Fock exchange.<sup>19</sup>

<sup>b</sup> The general formulation of a sigma natural bond orbital (NBO) is  $\sigma_{AB} = c_A h_A + c_B h_B$ , where  $h_A$  and  $h_B$  are the atom-centered hybrid orbitals of atoms A and B, and  $c_A$  and  $c_B$  are the normalized polarization coefficients of atoms A and B. If the natural ionicity of an NBO, given by  $i_{AB} = \frac{(c_A^2 - c_B^2)}{(c_A^2 + c_B^2)}$ , exceeds a fixed limit ( $|i_{AB}| > 0.95$ ), this extremely polarized “bond” is identified instead as a lone pair.<sup>20</sup>

<sup>c</sup> Orbital occupancy ( $0 \leq x \leq 2$ ) is the number of electrons in the specified NBO. Lower orbital occupancy values are indicative of stronger delocalization.<sup>20</sup>

<sup>d</sup> Hybridization of a given NBO is of the form  $sp^\lambda$ , where  $\lambda = (\frac{\%p}{\%s})$ .<sup>20</sup> Hybridizations with a very high value of  $\lambda$  (for example,  $sp^\infty$ ) have been denoted as non-applicable.

<sup>e</sup> Atomic orbital contributions denote the percent contribution of s, p, d, and f orbitals from atom A, and the percent contribution of s, p, d, and f orbitals from atom B, to their shared NBO  $\sigma_{AB}$  or  $\pi_{AB}$ .<sup>20</sup> Contributions from d and f orbitals are negligible and are omitted for simplicity. The percent contributions from each atom A ( $c_A^2 \times 100\%$ ) and B ( $c_B^2 \times 100\%$ ) to their shared NBO are also shown.

**Table S99.** NBO analysis<sup>a</sup> of (CF<sub>3</sub>L4)<sub>2</sub>Zn with the TPSSh functional.

| NBO <sup>b</sup>  | Occupancy <sup>c</sup> | Hybridization <sup>d</sup>               | Atomic Orbital Contributions (%) <sup>e</sup>                                |
|-------------------|------------------------|------------------------------------------|------------------------------------------------------------------------------|
| Lone pair 1 (N1)  | 1.84094                | $sp^{2.53}$                              | $s(28.29\%)p(71.68\%)$                                                       |
| $\sigma(N1-C5)$   | 1.98736                | $sp^{1.57}$ at N1<br>$sp^{2.01}$ at C5   | N1 (59.59%): $s(38.72\%)p(60.94\%)$<br>C5 (40.41%): $s(33.22\%)p(66.66\%)$   |
| $\pi(N1-C5)$      | 1.86062                | n/a                                      | N1 (70.16%): $s(0.07\%)p(99.79\%)$<br>C5 (29.84%): $s(0.10\%)p(99.75\%)$     |
| $\sigma(N1-C11)$  | 1.98219                | $sp^{2.04}$ at N1<br>$sp^{2.14}$ at C11  | N1 (58.01%): $s(32.76\%)p(66.95\%)$<br>C11 (41.99%): $s(31.82\%)p(68.09\%)$  |
| $\sigma(C2-C5)$   | 1.98387                | $sp^{2.88}$ at C2<br>$sp^{2.16}$ at C5   | C2 (51.34%): $s(25.73\%)p(74.11\%)$<br>C5 (48.66%): $s(31.60\%)p(68.34\%)$   |
| $\sigma(C3-C5)$   | 1.97714                | $sp^{1.84}$ at C3<br>$sp^{1.85}$ at C5   | C3 (49.82%): $s(35.17\%)p(64.64\%)$<br>C5 (50.18%): $s(35.07\%)p(64.85\%)$   |
| $\sigma(C3-C6)$   | 1.98567                | $sp^{1.91}$ at C3<br>$sp^{1.68}$ at C6   | C3 (51.38%): $s(34.27\%)p(65.54\%)$<br>C6 (48.62%): $s(37.34\%)p(62.56\%)$   |
| $\pi(C3-C6)$      | 1.63303                | n/a                                      | C3 (67.61%): $s(0.01\%)p(99.92\%)$<br>C6 (32.39%): $s(0.01\%)p(99.88\%)$     |
| $\sigma(C6-C8)$   | 1.98525                | $sp^{2.15}$ at C6<br>$sp^{2.94}$ at C8   | C6 (48.05%): $s(31.70\%)p(68.23\%)$<br>C8 (51.95%): $s(25.34\%)p(74.49\%)$   |
| $\sigma(C6-O7)$   | 1.99358                | $sp^{2.22}$ at C6<br>$sp^{1.66}$ at O7   | C6 (35.36%): $s(31.04\%)p(68.84\%)$<br>O7 (64.64%): $s(37.46\%)p(62.08\%)$   |
| Lone pair 1 (O7)  | 1.95806                | n/a                                      | $s(55.98\%)p(43.94\%)$                                                       |
| Lone pair 2 (O7)  | 1.88647                | n/a                                      | $s(6.52\%)p(93.36\%)$                                                        |
| Lone pair 3 (O7)  | 1.56978                | n/a                                      | $s(0.02\%)p(99.78\%)$                                                        |
| $\sigma(C11-C12)$ | 1.97662                | $sp^{1.78}$ at C11<br>$sp^{1.90}$ at C12 | C11 (50.17%): $s(35.93\%)p(63.97\%)$<br>C12 (49.83%): $s(34.37\%)p(65.45\%)$ |
| $\pi(C11-C12)$    | 1.64900                | n/a                                      | C11 (47.17%): $s(0.01\%)p(99.91\%)$<br>C12 (52.83%): $s(0.01\%)p(99.91\%)$   |
| $\sigma(C11-C10)$ | 1.97442                | $sp^{2.10}$ at C11<br>$sp^{1.95}$ at C10 | C11 (49.38%): $s(32.17\%)p(67.71\%)$<br>C10 (50.62%): $s(33.85\%)p(66.02\%)$ |
| Lone pair 1 (N4)  | 1.88565                | $sp^{2.27}$                              | $s(30.52\%)p(69.41\%)$                                                       |
| $\sigma(N4-C9)$   | 1.98626                | $sp^{1.68}$ at N4<br>$sp^{1.95}$ at C9   | N4 (58.94%): $s(37.15\%)p(62.51\%)$<br>C9 (41.06%): $s(33.84\%)p(66.03\%)$   |
| $\pi(N4-C9)$      | 1.84524                | n/a                                      | N4 (62.15%): $s(0.01\%)p(99.82\%)$<br>C9 (37.85%): $s(0.02\%)p(99.86\%)$     |
| $\sigma(N4-C10)$  | 1.98202                | $sp^{2.10}$ at N4<br>$sp^{2.30}$ at C10  | N4 (58.22%): $s(32.20\%)p(67.47\%)$<br>C10 (41.78%): $s(30.27\%)p(69.63\%)$  |

<sup>a</sup> Calculated in gas phase at the optimized S0 geometry using TPSSh (gas phase/ def2-tzvp def2/j). The TPSSh functional uses 10 % Hartree-Fock exchange.<sup>11</sup>

<sup>b</sup> The general formulation of a sigma natural bond orbital (NBO) is  $\sigma_{AB} = c_A h_A + c_B h_B$ , where  $h_A$  and  $h_B$  are the atom-centered hybrid orbitals of atoms A and B, and  $c_A$  and  $c_B$  are the normalized polarization coefficients of atoms A and B. If the natural ionicity of an NBO, given by  $i_{AB} = \frac{(c_A^2 - c_B^2)}{(c_A^2 + c_B^2)}$ , exceeds a fixed limit ( $|i_{AB}| > 0.95$ ), this extremely polarized “bond” is identified instead as a lone pair.<sup>20</sup>

<sup>c</sup> Orbital occupancy ( $0 \leq x \leq 2$ ) is the number of electrons in the specified NBO. Lower orbital occupancy values are indicative of stronger delocalization.<sup>20</sup>

<sup>d</sup> Hybridization of a given NBO is of the form  $sp^\lambda$ , where  $\lambda = \left(\frac{\%p}{\%s}\right)$ .<sup>20</sup> Hybridizations with a very high value of  $\lambda$  (for example,  $sp^\infty$ ) have been denoted as non-applicable.

<sup>e</sup> Atomic orbital contributions denote the percent contribution of s, p, d, and f orbitals from atom A, and the percent contribution of s, p, d, and f orbitals from atom B, to their shared NBO  $\sigma_{AB}$  or  $\pi_{AB}$ .<sup>20</sup> Contributions from d and f orbitals are negligible and are omitted for simplicity. The percent contributions from each atom A ( $c_A^2 \times 100\%$ ) and B ( $c_B^2 \times 100\%$ ) to their shared NBO are also shown.

**Table S100.** NBO analysis<sup>a</sup> of (CF<sub>3</sub>L4)<sub>2</sub>Zn with the O3LYP functional.

| NBO <sup>b</sup>  | Occupancy <sup>c</sup> | Hybridization <sup>d</sup>               | Atomic Orbital Contributions (%) <sup>e</sup>                                |
|-------------------|------------------------|------------------------------------------|------------------------------------------------------------------------------|
| Lone pair 1 (N1)  | 1.83866                | $sp^{2.56}$                              | $s(28.05\%)p(71.92\%)$                                                       |
| $\sigma(N1-C5)$   | 1.98724                | $sp^{1.56}$ at N1<br>$sp^{2.01}$ at C5   | N1 (59.46%): $s(38.86\%)p(60.80\%)$<br>C5 (40.54%): $s(33.24\%)p(66.65\%)$   |
| $\pi(N1-C5)$      | 1.85993                | n/a                                      | N1 (70.07%): $s(0.06\%)p(99.80\%)$<br>C5 (29.93%): $s(0.09\%)p(99.76\%)$     |
| $\sigma(N1-C11)$  | 1.98202                | $sp^{2.03}$ at N1<br>$sp^{2.14}$ at C11  | N1 (57.89%): $s(32.86\%)p(66.85\%)$<br>C11 (42.11%): $s(31.86\%)p(68.05\%)$  |
| $\sigma(C2-C5)$   | 1.98352                | $sp^{2.88}$ at C2<br>$sp^{2.16}$ at C5   | C2 (51.53%): $s(25.73\%)p(74.13\%)$<br>C5 (48.47%): $s(31.65\%)p(68.30\%)$   |
| $\sigma(C3-C5)$   | 1.97664                | $sp^{1.84}$ at C3<br>$sp^{1.85}$ at C5   | C3 (49.84%): $s(35.16\%)p(64.67\%)$<br>C5 (50.16%): $s(35.01\%)p(64.92\%)$   |
| $\sigma(C3-C6)$   | 1.98522                | $sp^{1.91}$ at C3<br>$sp^{1.68}$ at C6   | C3 (51.41%): $s(34.25\%)p(65.57\%)$<br>C6 (48.59%): $s(37.32\%)p(62.60\%)$   |
| $\pi(C3-C6)$      | 1.63054                | n/a                                      | C3 (67.49%): $s(0.01\%)p(99.92\%)$<br>C6 (32.51%): $s(0.01\%)p(99.89\%)$     |
| $\sigma(C6-C8)$   | 1.98503                | $sp^{2.16}$ at C6<br>$sp^{2.94}$ at C8   | C6 (47.84%): $s(31.67\%)p(68.27\%)$<br>C8 (52.16%): $s(25.36\%)p(74.49\%)$   |
| $\sigma(C6-O7)$   | 1.99350                | $sp^{2.21}$ at C6<br>$sp^{1.65}$ at O7   | C6 (35.56%): $s(31.10\%)p(68.78\%)$<br>O7 (64.44%): $s(37.53\%)p(62.00\%)$   |
| Lone pair 1 (O7)  | 1.95717                | n/a                                      | $s(56.30\%)p(43.63\%)$                                                       |
| Lone pair 2 (O7)  | 1.88491                | n/a                                      | $s(6.13\%)p(93.74\%)$                                                        |
| Lone pair 3 (O7)  | 1.56970                | n/a                                      | $s(0.02\%)p(99.77\%)$                                                        |
| $\sigma(C11-C12)$ | 1.97612                | $sp^{1.78}$ at C11<br>$sp^{1.90}$ at C12 | C11 (50.15%): $s(35.94\%)p(63.97\%)$<br>C12 (49.85%): $s(34.31\%)p(65.35\%)$ |
| $\pi(C11-C12)$    | 1.64816                | n/a                                      | C11 (47.13%): $s(0.01\%)p(99.92\%)$<br>C12 (52.87%): $s(0.01\%)p(99.91\%)$   |
| $\sigma(C11-C10)$ | 1.97400                | $sp^{2.11}$ at C11<br>$sp^{1.95}$ at C10 | C11 (49.39%): $s(32.12\%)p(67.77\%)$<br>C10 (50.61%): $s(33.82\%)p(66.07\%)$ |
| Lone pair 1 (N4)  | 1.88373                | $sp^{2.28}$                              | $s(30.42\%)p(69.50\%)$                                                       |
| $\sigma(N4-C9)$   | 1.98599                | $sp^{1.68}$ at N4<br>$sp^{1.95}$ at C9   | N4 (58.81%): $s(37.23\%)p(62.44\%)$<br>C9 (41.19%): $s(33.82\%)p(66.05\%)$   |
| $\pi(N4-C9)$      | 1.84617                | n/a                                      | N4 (62.09%): $s(0.01\%)p(99.81\%)$<br>C9 (37.91%): $s(0.02\%)p(99.86\%)$     |
| $\sigma(N4-C10)$  | 1.98177                | $sp^{2.09}$ at N4<br>$sp^{2.29}$ at C10  | N4 (58.06%): $s(32.22\%)p(67.46\%)$<br>C10 (41.94%): $s(30.32\%)p(69.58\%)$  |

<sup>a</sup> Calculated in gas phase at the optimized S0 geometry using O3LYP (gas phase/ def2-tzvpp def2/j). The O3LYP functional uses 11.61 % Hartree-Fock exchange.<sup>21</sup>

<sup>b</sup> The general formulation of a sigma natural bond orbital (NBO) is  $\sigma_{AB} = c_A h_A + c_B h_B$ , where  $h_A$  and  $h_B$  are the atom-centered hybrid orbitals of atoms A and B, and  $c_A$  and  $c_B$  are the normalized polarization coefficients of atoms A and B. If the natural ionicity of an NBO, given by  $i_{AB} = \frac{(c_A^2 - c_B^2)}{(c_A^2 + c_B^2)}$ , exceeds a fixed limit ( $|i_{AB}| > 0.95$ ), this extremely polarized “bond” is identified instead as a lone pair.<sup>20</sup>

<sup>c</sup> Orbital occupancy ( $0 \leq x \leq 2$ ) is the number of electrons in the specified NBO. Lower orbital occupancy values are indicative of stronger delocalization.<sup>20</sup>

<sup>d</sup> Hybridization of a given NBO is of the form  $sp^\lambda$ , where  $\lambda = (\frac{\%p}{\%s})$ .<sup>20</sup> Hybridizations with a very high value of  $\lambda$  (for example,  $sp^\infty$ ) have been denoted as non-applicable.

<sup>e</sup> Atomic orbital contributions denote the percent contribution of s, p, d, and f orbitals from atom A, and the percent contribution of s, p, d, and f orbitals from atom B, to their shared NBO  $\sigma_{AB}$  or  $\pi_{AB}$ .<sup>20</sup> Contributions from d and f orbitals are negligible and are omitted for simplicity. The percent contributions from each atom A ( $c_A^2 \times 100\%$ ) and B ( $c_B^2 \times 100\%$ ) to their shared NBO are also shown.

**Table S101.** NBO analysis<sup>a</sup> of (CF<sub>3</sub>L4)<sub>2</sub>Zn with the B3LYP functional.

| NBO <sup>b</sup>  | Occupancy <sup>c</sup> | Hybridization <sup>d</sup>               | Atomic Orbital Contributions (%) <sup>e</sup>                                |
|-------------------|------------------------|------------------------------------------|------------------------------------------------------------------------------|
| Lone pair 1 (N1)  | 1.84533                | $sp^{2.61}$                              | $s(27.71\%)p(72.26\%)$                                                       |
| $\sigma(N1-C5)$   | 1.98722                | $sp^{1.55}$ at N1<br>$sp^{2.01}$ at C5   | N1 (59.57%): $s(39.02\%)p(60.63\%)$<br>C5 (40.43%): $s(33.22\%)p(66.66\%)$   |
| $\pi(N1-C5)$      | 1.86389                | n/a                                      | N1 (70.71%): $s(0.06\%)p(99.80\%)$<br>C5 (29.29%): $s(0.08\%)p(99.77\%)$     |
| $\sigma(N1-C11)$  | 1.98233                | $sp^{2.02}$ at N1<br>$sp^{2.14}$ at C11  | N1 (58.00%): $s(33.05\%)p(66.65\%)$<br>C11 (42.00%): $s(31.86\%)p(68.04\%)$  |
| $\sigma(C2-C5)$   | 1.98394                | $sp^{2.85}$ at C2<br>$sp^{2.16}$ at C5   | C2 (51.46%): $s(25.91\%)p(73.93\%)$<br>C5 (48.54%): $s(31.64\%)p(68.29\%)$   |
| $\sigma(C3-C5)$   | 1.97700                | $sp^{1.84}$ at C3<br>$sp^{1.85}$ at C5   | C3 (49.81%): $s(35.20\%)p(64.60\%)$<br>C5 (50.19%): $s(35.04\%)p(64.87\%)$   |
| $\sigma(C3-C6)$   | 1.98515                | $sp^{1.91}$ at C3<br>$sp^{1.68}$ at C6   | C3 (51.36%): $s(34.29\%)p(65.51\%)$<br>C6 (48.64%): $s(37.31\%)p(62.59\%)$   |
| $\pi(C3-C6)$      | 1.63648                | n/a                                      | C3 (68.58%): $s(0.01\%)p(99.92\%)$<br>C6 (31.42%): $s(0.01\%)p(99.88\%)$     |
| $\sigma(C6-C8)$   | 1.98541                | $sp^{2.16}$ at C6<br>$sp^{2.91}$ at C8   | C6 (47.96%): $s(31.65\%)p(68.28\%)$<br>C8 (52.04%): $s(25.53\%)p(74.30\%)$   |
| $\sigma(C6-O7)$   | 1.99352                | $sp^{2.21}$ at C6<br>$sp^{1.62}$ at O7   | C6 (35.32%): $s(31.11\%)p(68.76\%)$<br>O7 (64.68%): $s(37.98\%)p(61.55\%)$   |
| Lone pair 1 (O7)  | 1.95701                | n/a                                      | $s(55.12\%)p(44.80\%)$                                                       |
| Lone pair 2 (O7)  | 1.89219                | n/a                                      | $s(6.87\%)p(93.02\%)$                                                        |
| Lone pair 3 (O7)  | 1.57926                | n/a                                      | $s(0.02\%)p(99.78\%)$                                                        |
| $\sigma(C11-C12)$ | 1.97651                | $sp^{1.78}$ at C11<br>$sp^{1.90}$ at C12 | C11 (50.13%): $s(35.91\%)p(63.99\%)$<br>C12 (49.87%): $s(34.39\%)p(65.42\%)$ |
| $\pi(C11-C12)$    | 1.65025                | n/a                                      | C11 (46.84%): $s(0.01\%)p(99.91\%)$<br>C12 (53.16%): $s(0.01\%)p(99.91\%)$   |
| $\sigma(C11-C10)$ | 1.97442                | $sp^{2.11}$ at C11<br>$sp^{1.95}$ at C10 | C11 (49.37%): $s(32.13\%)p(67.74\%)$<br>C10 (50.63%): $s(33.82\%)p(66.05\%)$ |
| Lone pair 1 (N4)  | 1.88890                | $sp^{2.34}$                              | $s(29.89\%)p(70.04\%)$                                                       |
| $\sigma(N4-C9)$   | 1.98595                | $sp^{1.66}$ at N4<br>$sp^{1.95}$ at C9   | N4 (58.91%): $s(37.47\%)p(62.18\%)$<br>C9 (41.09%): $s(33.87\%)p(65.99\%)$   |
| $\pi(N4-C9)$      | 1.84883                | n/a                                      | N4 (62.21%): $s(0.01\%)p(99.82\%)$<br>C9 (37.79%): $s(0.02\%)p(99.86\%)$     |
| $\sigma(N4-C10)$  | 1.98203                | $sp^{2.07}$ at N4<br>$sp^{2.30}$ at C10  | N4 (58.24%): $s(32.51\%)p(67.15\%)$<br>C10 (41.76%): $s(30.31\%)p(69.59\%)$  |

<sup>a</sup> Calculated in gas phase at the optimized S0 geometry using B3LYP (gas phase/ def2-tzvp def2/j). The B3LYP functional uses 20 % Hartree-Fock exchange.<sup>22</sup>

<sup>b</sup> The general formulation of a sigma natural bond orbital (NBO) is  $\sigma_{AB} = c_A h_A + c_B h_B$ , where  $h_A$  and  $h_B$  are the atom-centered hybrid orbitals of atoms A and B, and  $c_A$  and  $c_B$  are the normalized polarization coefficients of atoms A and B. If the natural ionicity of an NBO, given by  $i_{AB} = \frac{(c_A^2 - c_B^2)}{(c_A^2 + c_B^2)}$ , exceeds a fixed limit ( $|i_{AB}| > 0.95$ ), this extremely polarized “bond” is identified instead as a lone pair.<sup>20</sup>

<sup>c</sup> Orbital occupancy ( $0 \leq x \leq 2$ ) is the number of electrons in the specified NBO. Lower orbital occupancy values are indicative of stronger delocalization.<sup>20</sup>

<sup>d</sup> Hybridization of a given NBO is of the form  $sp^\lambda$ , where  $\lambda = (\frac{\%p}{\%s})$ .<sup>20</sup> Hybridizations with a very high value of  $\lambda$  (for example,  $sp^\infty$ ) have been denoted as non-applicable.

<sup>e</sup> Atomic orbital contributions denote the percent contribution of s, p, d, and f orbitals from atom A, and the percent contribution of s, p, d, and f orbitals from atom B, to their shared NBO  $\sigma_{AB}$  or  $\pi_{AB}$ .<sup>20</sup> Contributions from d and f orbitals are negligible and are omitted for simplicity. The percent contributions from each atom A ( $c_A^2 \times 100\%$ ) and B ( $c_B^2 \times 100\%$ ) to their shared NBO are also shown.

**Table S102.** NBO analysis<sup>a</sup> of (CF<sub>3</sub>L4)<sub>2</sub>Zn with the PBE0 functional.

| NBO <sup>b</sup>  | Occupancy <sup>c</sup> | Hybridization <sup>d</sup>               | Atomic Orbital Contributions (%) <sup>e</sup>                                |
|-------------------|------------------------|------------------------------------------|------------------------------------------------------------------------------|
| Lone pair 1 (N1)  | 1.84708                | $sp^{2.61}$                              | $s(27.69\%)p(72.28\%)$                                                       |
| $\sigma(N1-C5)$   | 1.98740                | $sp^{1.55}$ at N1<br>$sp^{2.01}$ at C5   | N1 (59.55%): $s(39.06\%)p(60.58\%)$<br>C5 (40.45%): $s(33.24\%)p(66.65\%)$   |
| $\pi(N1-C5)$      | 1.86532                | n/a                                      | N1 (70.96%): $s(0.07\%)p(99.78\%)$<br>C5 (29.04%): $s(0.08\%)p(99.75\%)$     |
| $\sigma(N1-C11)$  | 1.98244                | $sp^{2.02}$ at N1<br>$sp^{2.13}$ at C11  | N1 (57.91%): $s(33.02\%)p(66.67\%)$<br>C11 (42.09%): $s(31.88\%)p(68.02\%)$  |
| $\sigma(C2-C5)$   | 1.98400                | $sp^{2.86}$ at C2<br>$sp^{2.16}$ at C5   | C2 (51.51%): $s(25.84\%)p(74.00\%)$<br>C5 (48.49%): $s(31.61\%)p(68.33\%)$   |
| $\sigma(C3-C5)$   | 1.97706                | $sp^{1.84}$ at C3<br>$sp^{1.85}$ at C5   | C3 (49.86%): $s(35.18\%)p(64.63\%)$<br>C5 (50.14%): $s(35.06\%)p(64.86\%)$   |
| $\sigma(C3-C6)$   | 1.98529                | $sp^{1.91}$ at C3<br>$sp^{1.68}$ at C6   | C3 (51.48%): $s(34.27\%)p(65.53\%)$<br>C6 (48.52%): $s(37.31\%)p(62.60\%)$   |
| $\pi(C3-C6)$      | 1.63672                | n/a                                      | C3 (69.03%): $s(0.01\%)p(99.92\%)$<br>C6 (30.97%): $s(0.01\%)p(99.87\%)$     |
| $\sigma(C6-C8)$   | 1.98548                | $sp^{2.16}$ at C6<br>$sp^{2.92}$ at C8   | C6 (47.86%): $s(31.64\%)p(68.29\%)$<br>C8 (52.14%): $s(25.44\%)p(74.39\%)$   |
| $\sigma(C6-O7)$   | 1.99365                | $sp^{2.21}$ at C6<br>$sp^{1.63}$ at O7   | C6 (35.49%): $s(31.14\%)p(68.75\%)$<br>O7 (64.51%): $s(37.89\%)p(61.62\%)$   |
| Lone pair 1 (O7)  | 1.95775                | n/a                                      | $s(55.59\%)p(44.33\%)$                                                       |
| Lone pair 2 (O7)  | 1.89201                | n/a                                      | $s(6.49\%)p(93.39\%)$                                                        |
| Lone pair 3 (O7)  | 1.57904                | n/a                                      | $s(0.02\%)p(99.77\%)$                                                        |
| $\sigma(C11-C12)$ | 1.97663                | $sp^{1.78}$ at C11<br>$sp^{1.90}$ at C12 | C11 (50.11%): $s(35.91\%)p(64.00\%)$<br>C12 (49.89%): $s(34.38\%)p(65.44\%)$ |
| $\pi(C11-C12)$    | 1.65181                | n/a                                      | C11 (46.82%): $s(0.01\%)p(99.91\%)$<br>C12 (53.18%): $s(0.01\%)p(99.90\%)$   |
| $\sigma(C11-C10)$ | 1.97459                | $sp^{2.11}$ at C11<br>$sp^{1.95}$ at C10 | C11 (49.35%): $s(32.12\%)p(67.75\%)$<br>C10 (50.65%): $s(33.83\%)p(66.04\%)$ |
| Lone pair 1 (N4)  | 1.88872                | $sp^{2.33}$                              | $s(30.05\%)p(69.88\%)$                                                       |
| $\sigma(N4-C9)$   | 1.98617                | $sp^{1.67}$ at N4<br>$sp^{1.95}$ at C9   | N4 (58.85%): $s(37.37\%)p(62.26\%)$<br>C9 (41.15%): $s(33.87\%)p(66.00\%)$   |
| $\pi(N4-C9)$      | 1.84971                | n/a                                      | N4 (62.35%): $s(0.01\%)p(99.80\%)$<br>C9 (37.65%): $s(0.02\%)p(99.85\%)$     |
| $\sigma(N4-C10)$  | 1.98214                | $sp^{2.07}$ at N4<br>$sp^{2.30}$ at C10  | N4 (58.12%): $s(32.44\%)p(67.21\%)$<br>C10 (41.88%): $s(30.31\%)p(69.59\%)$  |

<sup>a</sup> Calculated in gas phase at the optimized S0 geometry using PBE0 (gas phase/ def2-tzvpp def2/j). The PBE0 functional uses 25 % Hartree-Fock exchange.<sup>14</sup>

<sup>b</sup> The general formulation of a sigma natural bond orbital (NBO) is  $\sigma_{AB} = c_A h_A + c_B h_B$ , where  $h_A$  and  $h_B$  are the atom-centered hybrid orbitals of atoms A and B, and  $c_A$  and  $c_B$  are the normalized polarization coefficients of atoms A and B. If the natural ionicity of an NBO, given by  $i_{AB} = \frac{(c_A^2 - c_B^2)}{(c_A^2 + c_B^2)}$ , exceeds a fixed limit ( $|i_{AB}| > 0.95$ ), this extremely polarized “bond” is identified instead as a lone pair.<sup>20</sup>

<sup>c</sup> Orbital occupancy ( $0 \leq x \leq 2$ ) is the number of electrons in the specified NBO. Lower orbital occupancy values are indicative of stronger delocalization.<sup>20</sup>

<sup>d</sup> Hybridization of a given NBO is of the form  $sp^\lambda$ , where  $\lambda = (\frac{\%p}{\%s})$ .<sup>20</sup> Hybridizations with a very high value of  $\lambda$  (for example,  $sp^\infty$ ) have been denoted as non-applicable.

<sup>e</sup> Atomic orbital contributions denote the percent contribution of s, p, d, and f orbitals from atom A, and the percent contribution of s, p, d, and f orbitals from atom B, to their shared NBO  $\sigma_{AB}$  or  $\pi_{AB}$ .<sup>20</sup> Contributions from d and f orbitals are negligible and are omitted for simplicity. The percent contributions from each atom A ( $c_A^2 \times 100\%$ ) and B ( $c_B^2 \times 100\%$ ) to their shared NBO are also shown.

**Table S103.** NBO analysis<sup>a</sup> of (CF<sub>3</sub>L4)<sub>2</sub>Zn with the M06 functional.

| NBO <sup>b</sup>  | Occupancy <sup>c</sup> | Hybridization <sup>d</sup>               | Atomic Orbital Contributions (%) <sup>e</sup>                                |
|-------------------|------------------------|------------------------------------------|------------------------------------------------------------------------------|
| Lone pair 1 (N1)  | 1.84368                | $sp^{2.59}$                              | $s(27.82\%)p(72.15\%)$                                                       |
| $\sigma(N1-C5)$   | 1.98723                | $sp^{1.56}$ at N1<br>$sp^{2.01}$ at C5   | N1 (59.79%): $s(38.94\%)p(60.77\%)$<br>C5 (40.21%): $s(33.20\%)p(66.71\%)$   |
| $\pi(N1-C5)$      | 1.86794                | n/a                                      | N1 (71.97%): $s(0.08\%)p(99.76\%)$<br>C5 (28.03%): $s(0.10\%)p(99.72\%)$     |
| $\sigma(N1-C11)$  | 1.98221                | $sp^{2.02}$ at N1<br>$sp^{2.14}$ at C11  | N1 (58.25%): $s(33.02\%)p(66.72\%)$<br>C11 (41.75%): $s(31.81\%)p(68.11\%)$  |
| $\sigma(C2-C5)$   | 1.98371                | $sp^{2.84}$ at C2<br>$sp^{2.16}$ at C5   | C2 (51.67%): $s(26.02\%)p(73.83\%)$<br>C5 (48.33%): $s(31.59\%)p(68.34\%)$   |
| $\sigma(C3-C5)$   | 1.97679                | $sp^{1.83}$ at C3<br>$sp^{1.85}$ at C5   | C3 (49.88%): $s(35.27\%)p(64.56\%)$<br>C5 (50.12%): $s(35.10\%)p(64.83\%)$   |
| $\sigma(C3-C6)$   | 1.98530                | $sp^{1.90}$ at C3<br>$sp^{1.68}$ at C6   | C3 (51.51%): $s(34.36\%)p(65.45\%)$<br>C6 (48.49%): $s(37.31\%)p(62.60\%)$   |
| $\pi(C3-C6)$      | 1.63823                | n/a                                      | C3 (70.25%): $s(0.01\%)p(99.92\%)$<br>C6 (29.75%): $s(0.02\%)p(99.87\%)$     |
| $\sigma(C6-C8)$   | 1.98528                | $sp^{2.16}$ at C6<br>$sp^{2.90}$ at C8   | C6 (47.66%): $s(31.58\%)p(68.34\%)$<br>C8 (52.34%): $s(25.60\%)p(74.24\%)$   |
| $\sigma(C6-O7)$   | 1.99362                | $sp^{2.20}$ at C6<br>$sp^{1.64}$ at O7   | C6 (35.09%): $s(31.18\%)p(68.73\%)$<br>O7 (64.91%): $s(37.73\%)p(61.83\%)$   |
| Lone pair 1 (O7)  | 1.95855                | n/a                                      | $s(55.77\%)p(44.15\%)$                                                       |
| Lone pair 2 (O7)  | 1.89108                | n/a                                      | $s(6.46\%)p(93.40\%)$                                                        |
| Lone pair 3 (O7)  | 1.58647                | n/a                                      | $s(0.01\%)p(99.75\%)$                                                        |
| $\sigma(C11-C12)$ | 1.97631                | $sp^{1.78}$ at C11<br>$sp^{1.90}$ at C12 | C11 (49.99%): $s(35.91\%)p(64.00\%)$<br>C12 (50.01%): $s(34.47\%)p(65.38\%)$ |
| $\pi(C11-C12)$    | 1.65207                | n/a                                      | C11 (46.37%): $s(0.01\%)p(99.91\%)$<br>C12 (53.63%): $s(0.02\%)p(99.90\%)$   |
| $\sigma(C11-C10)$ | 1.97415                | $sp^{2.10}$ at C11<br>$sp^{1.95}$ at C10 | C11 (49.36%): $s(32.19\%)p(67.69\%)$<br>C10 (50.64%): $s(33.88\%)p(66.00\%)$ |
| Lone pair 1 (N4)  | 1.88803                | $sp^{2.33}$                              | $s(29.97\%)p(69.94\%)$                                                       |
| $\sigma(N4-C9)$   | 1.98589                | $sp^{1.67}$ at N4<br>$sp^{1.94}$ at C9   | N4 (58.97%): $s(37.35\%)p(62.34\%)$<br>C9 (41.03%): $s(33.93\%)p(65.97\%)$   |
| $\pi(N4-C9)$      | 1.85400                | n/a                                      | N4 (62.80%): $s(0.01\%)p(99.79\%)$<br>C9 (37.20%): $s(0.01\%)p(99.84\%)$     |
| $\sigma(N4-C10)$  | 1.98166                | $sp^{2.06}$ at N4<br>$sp^{2.31}$ at C10  | N4 (58.49%): $s(32.56\%)p(67.14\%)$<br>C10 (41.51%): $s(30.23\%)p(69.69\%)$  |

<sup>a</sup> Calculated in gas phase at the optimized S0 geometry using M06 (gas phase/ def2-tzvpp def2/j). The M06 functional uses 27 % Hartree-Fock exchange.<sup>23</sup>

<sup>b</sup> The general formulation of a sigma natural bond orbital (NBO) is  $\sigma_{AB} = c_A h_A + c_B h_B$ , where  $h_A$  and  $h_B$  are the atom-centered hybrid orbitals of atoms A and B, and  $c_A$  and  $c_B$  are the normalized polarization coefficients of atoms A and B. If the natural ionicity of an NBO, given by  $i_{AB} = \frac{(c_A^2 - c_B^2)}{(c_A^2 + c_B^2)}$ , exceeds a fixed limit ( $|i_{AB}| > 0.95$ ), this extremely polarized “bond” is identified instead as a lone pair.<sup>20</sup>

<sup>c</sup> Orbital occupancy ( $0 \leq x \leq 2$ ) is the number of electrons in the specified NBO. Lower orbital occupancy values are indicative of stronger delocalization.<sup>20</sup>

<sup>d</sup> Hybridization of a given NBO is of the form  $sp^\lambda$ , where  $\lambda = (\frac{\%p}{\%s})$ .<sup>20</sup> Hybridizations with a very high value of  $\lambda$  (for example,  $sp^\infty$ ) have been denoted as non-applicable.

<sup>e</sup> Atomic orbital contributions denote the percent contribution of s, p, d, and f orbitals from atom A, and the percent contribution of s, p, d, and f orbitals from atom B, to their shared NBO  $\sigma_{AB}$  or  $\pi_{AB}$ .<sup>20</sup> Contributions from d and f orbitals are negligible and are omitted for simplicity. The percent contributions from each atom A ( $c_A^2 \times 100\%$ ) and B ( $c_B^2 \times 100\%$ ) to their shared NBO are also shown.

**Table S104.** NBO analysis<sup>a</sup> of (CF<sup>3</sup>L4)<sub>2</sub>Zn with the M06-2X functional.

| NBO <sup>b</sup>  | Occupancy <sup>c</sup> | Hybridization <sup>d</sup>               | Atomic Orbital Contributions (%) <sup>e</sup>                                |
|-------------------|------------------------|------------------------------------------|------------------------------------------------------------------------------|
| Lone pair 1 (N1)  | 1.86365                | $sp^{2.69}$                              | $s(27.12\%)p(72.85\%)$                                                       |
| $\sigma(N1-C5)$   | 1.98721                | $sp^{1.53}$ at N1<br>$sp^{2.02}$ at C5   | N1 (59.71%): $s(39.41\%)p(60.24\%)$<br>C5 (40.29%): $s(33.13\%)p(66.77\%)$   |
| $\pi(N1-C5)$      | 1.87230                | n/a                                      | N1 (71.48%): $s(0.08\%)p(99.75\%)$<br>C5 (28.52%): $s(0.09\%)p(99.74\%)$     |
| $\sigma(N1-C11)$  | 1.98243                | $sp^{2.00}$ at N1<br>$sp^{2.13}$ at C11  | N1 (57.97%): $s(33.25\%)p(66.45\%)$<br>C11 (42.03%): $s(31.90\%)p(68.02\%)$  |
| $\sigma(C2-C5)$   | 1.98438                | $sp^{2.86}$ at C2<br>$sp^{2.16}$ at C5   | C2 (51.38%): $s(25.89\%)p(73.97\%)$<br>C5 (48.62%): $s(31.67\%)p(68.27\%)$   |
| $\sigma(C3-C5)$   | 1.97710                | $sp^{1.84}$ at C3<br>$sp^{1.85}$ at C5   | C3 (49.79%): $s(35.17\%)p(64.65\%)$<br>C5 (50.21%): $s(35.12\%)p(64.81\%)$   |
| $\sigma(C3-C6)$   | 1.98483                | $sp^{1.91}$ at C3<br>$sp^{1.68}$ at C6   | C3 (51.44%): $s(34.27\%)p(65.55\%)$<br>C6 (48.56%): $s(37.33\%)p(62.58\%)$   |
| $\pi(C3-C6)$      | 1.64449                | n/a                                      | C3 (70.61%): $s(0.02\%)p(99.92\%)$<br>C6 (29.39%): $s(0.02\%)p(99.87\%)$     |
| $\sigma(C6-C8)$   | 1.98582                | $sp^{2.15}$ at C6<br>$sp^{2.92}$ at C8   | C6 (48.04%): $s(31.69\%)p(68.24\%)$<br>C8 (51.96%): $s(25.44\%)p(74.40\%)$   |
| $\sigma(C6-O7)$   | 1.99393                | $sp^{2.21}$ at C6<br>$sp^{1.57}$ at O7   | C6 (35.24%): $s(31.08\%)p(68.82\%)$<br>O7 (64.76%): $s(38.71\%)p(60.80\%)$   |
| Lone pair 1 (O7)  | 1.95772                | n/a                                      | $s(55.16\%)p(44.76\%)$                                                       |
| Lone pair 2 (O7)  | 1.90563                | n/a                                      | $s(6.10\%)p(93.77\%)$                                                        |
| Lone pair 3 (O7)  | 1.58655                | n/a                                      | $s(0.02\%)p(99.74\%)$                                                        |
| $\sigma(C11-C12)$ | 1.97701                | $sp^{1.78}$ at C11<br>$sp^{1.90}$ at C12 | C11 (50.10%): $s(35.92\%)p(63.99\%)$<br>C12 (49.90%): $s(34.45\%)p(65.38\%)$ |
| $\pi(C11-C12)$    | 1.65791                | n/a                                      | C11 (46.56%): $s(0.01\%)p(99.91\%)$<br>C12 (53.44%): $s(0.02\%)p(99.91\%)$   |
| $\sigma(C11-C10)$ | 1.97497                | $sp^{2.11}$ at C11<br>$sp^{1.95}$ at C10 | C11 (49.30%): $s(32.11\%)p(67.78\%)$<br>C10 (50.70%): $s(33.85\%)p(66.03\%)$ |
| Lone pair 1 (N4)  | 1.90053                | $sp^{2.40}$                              | $s(29.41\%)p(70.51\%)$                                                       |
| $\sigma(N4-C9)$   | 1.98621                | $sp^{1.64}$ at N4<br>$sp^{1.95}$ at C9   | N4 (59.02%): $s(37.68\%)p(61.96\%)$<br>C9 (40.98%): $s(33.84\%)p(66.04\%)$   |
| $\pi(N4-C9)$      | 1.85696                | n/a                                      | N4 (62.23%): $s(0.01\%)p(99.77\%)$<br>C9 (37.77%): $s(0.01\%)p(99.85\%)$     |
| $\sigma(N4-C10)$  | 1.98215                | $sp^{2.04}$ at N4<br>$sp^{2.30}$ at C10  | N4 (58.33%): $s(32.78\%)p(66.88\%)$<br>C10 (41.67%): $s(30.28\%)p(69.64\%)$  |

<sup>a</sup> Calculated in gas phase at the optimized S0 geometry using M06-2X (gas phase/ def2-tzvpp def2/j). The M06-2X functional uses 54 % Hartree-Fock exchange.<sup>23</sup>

<sup>b</sup> The general formulation of a sigma natural bond orbital (NBO) is  $\sigma_{AB} = c_A h_A + c_B h_B$ , where  $h_A$  and  $h_B$  are the atom-centered hybrid orbitals of atoms A and B, and  $c_A$  and  $c_B$  are the normalized polarization coefficients of atoms A and B. If the natural ionicity of an NBO, given by  $i_{AB} = \frac{(c_A^2 - c_B^2)}{(c_A^2 + c_B^2)}$ , exceeds a fixed limit ( $|i_{AB}| > 0.95$ ), this extremely polarized “bond” is identified instead as a lone pair.<sup>20</sup>

<sup>c</sup> Orbital occupancy ( $0 \leq x \leq 2$ ) is the number of electrons in the specified NBO. Lower orbital occupancy values are indicative of stronger delocalization.<sup>20</sup>

<sup>d</sup> Hybridization of a given NBO is of the form  $sp^\lambda$ , where  $\lambda = (\frac{\%p}{\%s})$ .<sup>20</sup> Hybridizations with a very high value of  $\lambda$  (for example,  $sp^\infty$ ) have been denoted as non-applicable.

<sup>e</sup> Atomic orbital contributions denote the percent contribution of s, p, d, and f orbitals from atom A, and the percent contribution of s, p, d, and f orbitals from atom B, to their shared NBO  $\sigma_{AB}$  or  $\pi_{AB}$ .<sup>20</sup> Contributions from d and f orbitals are negligible and are omitted for simplicity. The percent contributions from each atom A ( $c_A^2 \times 100\%$ ) and B ( $c_B^2 \times 100\%$ ) to their shared NBO are also shown.

**Table S105.** NBO analysis<sup>a</sup> of (CF<sub>3</sub>L4)<sub>2</sub>Zn with the CAM-B3LYP functional.

| NBO <sup>b</sup>  | Occupancy <sup>c</sup> | Hybridization <sup>d</sup>               | Atomic Orbital Contributions (%) <sup>e</sup>                                |
|-------------------|------------------------|------------------------------------------|------------------------------------------------------------------------------|
| Lone pair 1 (N1)  | 1.85329                | $sp^{2.72}$                              | $s(26.90\%)p(73.07\%)$                                                       |
| $\sigma(N1-C5)$   | 1.98722                | $sp^{1.52}$ at N1<br>$sp^{2.01}$ at C5   | N1 (59.59%): $s(39.47\%)p(60.17\%)$<br>C5 (40.41%): $s(33.15\%)p(66.73\%)$   |
| $\pi(N1-C5)$      | 1.87425                | n/a                                      | N1 (71.92%): $s(0.08\%)p(99.77\%)$<br>C5 (28.08%): $s(0.07\%)p(99.75\%)$     |
| $\sigma(N1-C11)$  | 1.98271                | $sp^{1.98}$ at N1<br>$sp^{2.14}$ at C11  | N1 (57.95%): $s(33.40\%)p(66.29\%)$<br>C11 (42.05%): $s(31.86\%)p(68.04\%)$  |
| $\sigma(C2-C5)$   | 1.98436                | $sp^{2.83}$ at C2<br>$sp^{2.16}$ at C5   | C2 (51.49%): $s(26.04\%)p(73.79\%)$<br>C5 (48.51%): $s(31.67\%)p(68.26\%)$   |
| $\sigma(C3-C5)$   | 1.97712                | $sp^{1.83}$ at C3<br>$sp^{1.85}$ at C5   | C3 (49.80%): $s(35.21\%)p(64.59\%)$<br>C5 (50.20%): $s(35.09\%)p(64.82\%)$   |
| $\sigma(C3-C6)$   | 1.98488                | $sp^{1.91}$ at C3<br>$sp^{1.67}$ at C6   | C3 (51.38%): $s(34.29\%)p(65.50\%)$<br>C6 (48.62%): $s(37.35\%)p(62.55\%)$   |
| $\pi(C3-C6)$      | 1.64903                | n/a                                      | C3 (70.55%): $s(0.02\%)p(99.91\%)$<br>C6 (29.45%): $s(0.01\%)p(99.86\%)$     |
| $\sigma(C6-C8)$   | 1.98590                | $sp^{2.15}$ at C6<br>$sp^{2.90}$ at C8   | C6 (47.97%): $s(31.68\%)p(68.24\%)$<br>C8 (52.03%): $s(25.61\%)p(74.20\%)$   |
| $\sigma(C6-O7)$   | 1.99363                | $sp^{2.22}$ at C6<br>$sp^{1.58}$ at O7   | C6 (35.31%): $s(31.05\%)p(68.82\%)$<br>O7 (64.69%): $s(38.64\%)p(60.87\%)$   |
| Lone pair 1 (O7)  | 1.95679                | n/a                                      | $s(53.64\%)p(46.28\%)$                                                       |
| Lone pair 2 (O7)  | 1.89895                | n/a                                      | $s(7.68\%)p(92.19\%)$                                                        |
| Lone pair 3 (O7)  | 1.58800                | n/a                                      | $s(0.02\%)p(99.76\%)$                                                        |
| $\sigma(C11-C12)$ | 1.97664                | $sp^{1.78}$ at C11<br>$sp^{1.90}$ at C12 | C11 (50.07%): $s(35.91\%)p(63.99\%)$<br>C12 (49.93%): $s(34.46\%)p(65.35\%)$ |
| $\pi(C11-C12)$    | 1.65874                | n/a                                      | C11 (46.37%): $s(0.01\%)p(99.90\%)$<br>C12 (53.63%): $s(0.01\%)p(99.90\%)$   |
| $\sigma(C11-C10)$ | 1.97501                | $sp^{2.11}$ at C11<br>$sp^{1.95}$ at C10 | C11 (49.31%): $s(32.13\%)p(67.74\%)$<br>C10 (50.69%): $s(33.86\%)p(66.00\%)$ |
| Lone pair 1 (N4)  | 1.89480                | $sp^{2.42}$                              | $s(29.22\%)p(70.70\%)$                                                       |
| $\sigma(N4-C9)$   | 1.98587                | $sp^{1.64}$ at N4<br>$sp^{1.95}$ at C9   | N4 (58.87%): $s(37.73\%)p(61.90\%)$<br>C9 (41.13%): $s(33.88\%)p(65.98\%)$   |
| $\pi(N4-C9)$      | 1.85807                | n/a                                      | N4 (62.46%): $s(0.01\%)p(99.80\%)$<br>C9 (37.54%): $s(0.02\%)p(99.85\%)$     |
| $\sigma(N4-C10)$  | 1.98232                | $sp^{2.03}$ at N4<br>$sp^{2.30}$ at C10  | N4 (58.25%): $s(32.91\%)p(66.74\%)$<br>C10 (41.75%): $s(30.25\%)p(69.64\%)$  |

<sup>a</sup> Calculated in gas phase at the optimized S0 geometry using CAM-B3LYP (gas phase/ def2-tzvpp def2/j). The CAM-B3LYP functional is a range-separated functional, and uses 19 % Hartree-Fock exchange at short range, 33 % Hartree-Fock exchange at intermediate range, and 65 % Hartree-Fock exchange at long range.<sup>15</sup>

<sup>b</sup> The general formulation of a sigma natural bond orbital (NBO) is  $\sigma_{AB} = c_A h_A + c_B h_B$ , where  $h_A$  and  $h_B$  are the atom-centered hybrid orbitals of atoms A and B, and  $c_A$  and  $c_B$  are the normalized polarization coefficients of atoms A and B. If the natural ionicity of an NBO, given by  $i_{AB} = \frac{(c_A^2 - c_B^2)}{(c_A^2 + c_B^2)}$ , exceeds a fixed limit ( $|i_{AB}| > 0.95$ ), this extremely polarized “bond” is identified instead as a lone pair.<sup>20</sup>

<sup>c</sup> Orbital occupancy ( $0 \leq x \leq 2$ ) is the number of electrons in the specified NBO. Lower orbital occupancy values are indicative of stronger delocalization.<sup>20</sup>

<sup>d</sup> Hybridization of a given NBO is of the form  $sp^\lambda$ , where  $\lambda = (\frac{\%p}{\%s})$ .<sup>20</sup> Hybridizations with a very high value of  $\lambda$  (for example,  $sp^\infty$ ) have been denoted as non-applicable.

<sup>e</sup> Atomic orbital contributions denote the percent contribution of s, p, d, and f orbitals from atom A, and the percent contribution of s, p, d, and f orbitals from atom B, to their shared NBO  $\sigma_{AB}$  or  $\pi_{AB}$ .<sup>20</sup> Contributions from d and f orbitals are negligible and are omitted for simplicity. The percent contributions from each atom A ( $c_A^2 \times 100\%$ ) and B ( $c_B^2 \times 100\%$ ) to their shared NBO are also shown.

**Table S106.** NBO analysis<sup>a</sup> of (<sup>t</sup>BuL4)<sub>2</sub>Zn with the M06-L functional.

| NBO <sup>b</sup>  | Occupancy <sup>c</sup> | Hybridization <sup>d</sup>               | Atomic Orbital Contributions (%) <sup>e</sup>                                |
|-------------------|------------------------|------------------------------------------|------------------------------------------------------------------------------|
| Lone pair 1 (N1)  | 1.83908                | $sp^{2.31}$                              | $s(30.21\%)p(69.74\%)$                                                       |
| $\sigma(N1-C5)$   | 1.98649                | $sp^{1.67}$ at N1<br>$sp^{2.02}$ at C5   | N1 (59.69%): $s(37.34\%)p(62.36\%)$<br>C5 (40.31%): $s(33.06\%)p(66.85\%)$   |
| $\pi(N1-C5)$      | 1.87061                | n/a                                      | N1 (70.02%): $s(0.18\%)p(99.67\%)$<br>C5 (29.98%): $s(0.25\%)p(99.58\%)$     |
| $\sigma(N1-C11)$  | 1.98126                | $sp^{2.10}$ at N1<br>$sp^{2.21}$ at C11  | N1 (58.19%): $s(32.14\%)p(67.59\%)$<br>C11 (41.81%): $s(31.14\%)p(68.78\%)$  |
| $\sigma(C2-C5)$   | 1.98373                | $sp^{2.85}$ at C2<br>$sp^{2.26}$ at C5   | C2 (52.08%): $s(25.97\%)p(73.89\%)$<br>C5 (47.92%): $s(30.63\%)p(69.29\%)$   |
| $\sigma(C3-C5)$   | 1.97829                | $sp^{1.80}$ at C3<br>$sp^{1.77}$ at C5   | C3 (50.14%): $s(35.60\%)p(64.21\%)$<br>C5 (49.86%): $s(36.02\%)p(63.89\%)$   |
| $\sigma(C3-C6)$   | 1.98583                | $sp^{1.94}$ at C3<br>$sp^{1.66}$ at C6   | C3 (51.43%): $s(33.91\%)p(65.89\%)$<br>C6 (48.57%): $s(37.51\%)p(62.39\%)$   |
| $\pi(C3-C6)$      | 1.64582                | n/a                                      | C3 (67.94%): $s(0.01\%)p(99.91\%)$<br>C6 (32.06%): $s(0.01\%)p(99.89\%)$     |
| $\sigma(C6-C8)$   | 1.98636                | $sp^{2.13}$ at C6<br>$sp^{2.83}$ at C8   | C6 (47.32%): $s(31.87\%)p(68.04\%)$<br>C8 (52.68%): $s(26.04\%)p(73.79\%)$   |
| $\sigma(C6-O7)$   | 1.99333                | $sp^{2.26}$ at C6<br>$sp^{1.80}$ at O7   | C6 (35.29%): $s(30.67\%)p(69.23\%)$<br>O7 (64.71%): $s(35.58\%)p(64.00\%)$   |
| Lone pair 1 (O7)  | 1.95992                | n/a                                      | $s(58.02\%)p(41.91\%)$                                                       |
| Lone pair 2 (O7)  | 1.89031                | n/a                                      | $s(6.36\%)p(93.53\%)$                                                        |
| Lone pair 3 (O7)  | 1.58118                | n/a                                      | $s(0.01\%)p(99.80\%)$                                                        |
| $\sigma(C11-C12)$ | 1.97550                | $sp^{1.76}$ at C11<br>$sp^{1.92}$ at C12 | C11 (50.19%): $s(36.16\%)p(63.75\%)$<br>C12 (49.81%): $s(34.16\%)p(65.66\%)$ |
| $\pi(C11-C12)$    | 1.66357                | n/a                                      | C11 (46.22%): $s(0.02\%)p(99.90\%)$<br>C12 (53.78%): $s(0.04\%)p(99.87\%)$   |
| $\sigma(C11-C10)$ | 1.97282                | $sp^{2.06}$ at C11<br>$sp^{1.93}$ at C10 | C11 (49.18%): $s(32.61\%)p(67.25\%)$<br>C10 (50.82%): $s(34.10\%)p(65.75\%)$ |
| Lone pair 1 (N4)  | 1.88963                | $sp^{2.03}$                              | $s(32.99\%)p(66.97\%)$                                                       |
| $\sigma(N4-C9)$   | 1.98607                | $sp^{1.83}$ at N4<br>$sp^{1.98}$ at C9   | N4 (58.78%): $s(35.28\%)p(64.42\%)$<br>C9 (41.22%): $s(33.57\%)p(66.33\%)$   |
| $\pi(N4-C9)$      | 1.84226                | n/a                                      | N4 (61.26%): $s(0.00\%)p(99.83\%)$<br>C9 (38.74%): $s(0.00\%)p(99.86\%)$     |
| $\sigma(N4-C10)$  | 1.98147                | $sp^{2.16}$ at N4<br>$sp^{2.30}$ at C10  | N4 (58.23%): $s(31.60\%)p(68.10\%)$<br>C10 (41.77%): $s(30.26\%)p(69.65\%)$  |

<sup>a</sup> Calculated in gas phase at the optimized S0 geometry using M06-L (gas phase/ def2-tzvp def2/j). The M06-L functional uses 0 % Hartree-Fock exchange.<sup>19</sup>

<sup>b</sup> The general formulation of a sigma natural bond orbital (NBO) is  $\sigma_{AB} = c_A h_A + c_B h_B$ , where  $h_A$  and  $h_B$  are the atom-centered hybrid orbitals of atoms A and B, and  $c_A$  and  $c_B$  are the normalized polarization coefficients of atoms A and B. If the natural ionicity of an NBO, given by  $i_{AB} = \frac{(c_A^2 - c_B^2)}{(c_A^2 + c_B^2)}$ , exceeds a fixed limit ( $|i_{AB}| > 0.95$ ), this extremely polarized “bond” is identified instead as a lone pair.<sup>20</sup>

<sup>c</sup> Orbital occupancy ( $0 \leq x \leq 2$ ) is the number of electrons in the specified NBO. Lower orbital occupancy values are indicative of stronger delocalization.<sup>20</sup>

<sup>d</sup> Hybridization of a given NBO is of the form  $sp^\lambda$ , where  $\lambda = (\frac{\%p}{\%s})$ .<sup>20</sup> Hybridizations with a very high value of  $\lambda$  (for example,  $sp^\infty$ ) have been denoted as non-applicable.

<sup>e</sup> Atomic orbital contributions denote the percent contribution of s, p, d, and f orbitals from atom A, and the percent contribution of s, p, d, and f orbitals from atom B, to their shared NBO  $\sigma_{AB}$  or  $\pi_{AB}$ .<sup>20</sup> Contributions from d and f orbitals are negligible and are omitted for simplicity. The percent contributions from each atom A ( $c_A^2 \times 100\%$ ) and B ( $c_B^2 \times 100\%$ ) to their shared NBO are also shown.

**Table S107.** NBO analysis<sup>a</sup> of (<sup>t</sup>BuL4)<sub>2</sub>Zn with the TPSSh functional.

| NBO <sup>b</sup>  | Occupancy <sup>c</sup> | Hybridization <sup>d</sup>               | Atomic Orbital Contributions (%) <sup>e</sup>                                |
|-------------------|------------------------|------------------------------------------|------------------------------------------------------------------------------|
| Lone pair 1 (N1)  | 1.83910                | $sp^{2.49}$                              | $s(28.64\%)p(71.32\%)$                                                       |
| $\sigma(N1-C5)$   | 1.98661                | $sp^{1.61}$ at N1<br>$sp^{2.02}$ at C5   | N1 (59.45%): $s(38.21\%)p(61.45\%)$<br>C5 (40.55%): $s(33.12\%)p(66.77\%)$   |
| $\pi(N1-C5)$      | 1.87312                | n/a                                      | N1 (69.74%): $s(0.16\%)p(99.70\%)$<br>C5 (30.26%): $s(0.19\%)p(99.66\%)$     |
| $\sigma(N1-C11)$  | 1.98158                | $sp^{2.03}$ at N1<br>$sp^{2.20}$ at C11  | N1 (57.93%): $s(32.86\%)p(66.85\%)$<br>C11 (42.07%): $s(31.23\%)p(68.67\%)$  |
| $\sigma(C2-C5)$   | 1.98353                | $sp^{2.87}$ at C2<br>$sp^{2.25}$ at C5   | C2 (51.60%): $s(25.78\%)p(74.07\%)$<br>C5 (48.40%): $s(30.79\%)p(69.15\%)$   |
| $\sigma(C3-C5)$   | 1.97779                | $sp^{1.81}$ at C3<br>$sp^{1.78}$ at C5   | C3 (49.99%): $s(35.56\%)p(64.25\%)$<br>C5 (50.01%): $s(35.89\%)p(64.03\%)$   |
| $\sigma(C3-C6)$   | 1.98515                | $sp^{1.95}$ at C3<br>$sp^{1.67}$ at C6   | C3 (51.28%): $s(33.83\%)p(65.98\%)$<br>C6 (48.72%): $s(37.48\%)p(62.44\%)$   |
| $\pi(C3-C6)$      | 1.64490                | n/a                                      | C3 (67.62%): $s(0.01\%)p(99.92\%)$<br>C6 (32.38%): $s(0.00\%)p(99.89\%)$     |
| $\sigma(C6-C8)$   | 1.98613                | $sp^{2.13}$ at C6<br>$sp^{2.86}$ at C8   | C6 (47.84%): $s(31.97\%)p(67.96\%)$<br>C8 (52.16%): $s(25.89\%)p(73.93\%)$   |
| $\sigma(C6-O7)$   | 1.99334                | $sp^{2.26}$ at C6<br>$sp^{1.72}$ at O7   | C6 (35.52%): $s(30.63\%)p(69.26\%)$<br>O7 (64.48%): $s(36.58\%)p(62.98\%)$   |
| Lone pair 1 (O7)  | 1.95815                | n/a                                      | $s(55.85\%)p(44.08\%)$                                                       |
| Lone pair 2 (O7)  | 1.89029                | n/a                                      | $s(7.54\%)p(92.36\%)$                                                        |
| Lone pair 3 (O7)  | 1.57928                | n/a                                      | $s(0.01\%)p(99.81\%)$                                                        |
| $\sigma(C11-C12)$ | 1.97484                | $sp^{1.76}$ at C11<br>$sp^{1.93}$ at C12 | C11 (50.38%): $s(36.17\%)p(63.74\%)$<br>C12 (49.62%): $s(34.07\%)p(65.75\%)$ |
| $\pi(C11-C12)$    | 1.66500                | n/a                                      | C11 (46.80%): $s(0.02\%)p(99.91\%)$<br>C12 (53.20%): $s(0.04\%)p(99.88\%)$   |
| $\sigma(C11-C10)$ | 1.97256                | $sp^{2.07}$ at C11<br>$sp^{1.93}$ at C10 | C11 (49.16%): $s(32.51\%)p(67.37\%)$<br>C10 (50.84%): $s(34.04\%)p(65.83\%)$ |
| Lone pair 1 (N4)  | 1.88853                | $sp^{2.15}$                              | $s(31.78\%)p(68.18\%)$                                                       |
| $\sigma(N4-C9)$   | 1.98610                | $sp^{1.78}$ at N4<br>$sp^{1.98}$ at C9   | N4 (58.72%): $s(35.86\%)p(63.82\%)$<br>C9 (41.28%): $s(33.55\%)p(66.32\%)$   |
| $\pi(N4-C9)$      | 1.84135                | n/a                                      | N4 (61.51%): $s(0.00\%)p(99.83\%)$<br>C9 (38.49%): $s(0.00\%)p(99.87\%)$     |
| $\sigma(N4-C10)$  | 1.98200                | $sp^{2.09}$ at N4<br>$sp^{2.29}$ at C10  | N4 (57.99%): $s(32.22\%)p(67.46\%)$<br>C10 (42.01%): $s(30.34\%)p(69.55\%)$  |

<sup>a</sup> Calculated in gas phase at the optimized S0 geometry using TPSSh (gas phase/ def2-tzvpp def2/j). The TPSSh functional uses 10 % Hartree-Fock exchange.<sup>11</sup>

<sup>b</sup> The general formulation of a sigma natural bond orbital (NBO) is  $\sigma_{AB} = c_A h_A + c_B h_B$ , where  $h_A$  and  $h_B$  are the atom-centered hybrid orbitals of atoms A and B, and  $c_A$  and  $c_B$  are the normalized polarization coefficients of atoms A and B. If the natural ionicity of an NBO, given by  $i_{AB} = \frac{(c_A^2 - c_B^2)}{(c_A^2 + c_B^2)}$ , exceeds a fixed limit ( $|i_{AB}| > 0.95$ ), this extremely polarized “bond” is identified instead as a lone pair.<sup>20</sup>

<sup>c</sup> Orbital occupancy ( $0 \leq x \leq 2$ ) is the number of electrons in the specified NBO. Lower orbital occupancy values are indicative of stronger delocalization.<sup>20</sup>

<sup>d</sup> Hybridization of a given NBO is of the form  $sp^\lambda$ , where  $\lambda = (\frac{\%p}{\%s})$ .<sup>20</sup> Hybridizations with a very high value of  $\lambda$  (for example,  $sp^\infty$ ) have been denoted as non-applicable.

<sup>e</sup> Atomic orbital contributions denote the percent contribution of s, p, d, and f orbitals from atom A, and the percent contribution of s, p, d, and f orbitals from atom B, to their shared NBO  $\sigma_{AB}$  or  $\pi_{AB}$ .<sup>20</sup> Contributions from d and f orbitals are negligible and are omitted for simplicity. The percent contributions from each atom A ( $c_A^2 \times 100\%$ ) and B ( $c_B^2 \times 100\%$ ) to their shared NBO are also shown.

**Table S108.** NBO analysis<sup>a</sup> of (<sup>t</sup>BuL4)<sub>2</sub>Zn with the O3LYP functional.

| NBO <sup>b</sup>  | Occupancy <sup>c</sup> | Hybridization <sup>d</sup>               | Atomic Orbital Contributions (%) <sup>e</sup>                                |
|-------------------|------------------------|------------------------------------------|------------------------------------------------------------------------------|
| Lone pair 1 (N1)  | 1.83659                | $sp^{2.52}$                              | $s(28.41\%)p(71.54\%)$                                                       |
| $\sigma(N1-C5)$   | 1.98651                | $sp^{1.60}$ at N1<br>$sp^{2.01}$ at C5   | N1 (59.31%): $s(38.35\%)p(61.31\%)$<br>C5 (40.69%): $s(33.15\%)p(66.74\%)$   |
| $\pi(N1-C5)$      | 1.87282                | n/a                                      | N1 (69.65%): $s(0.15\%)p(99.71\%)$<br>C5 (30.35%): $s(0.18\%)p(99.67\%)$     |
| $\sigma(N1-C11)$  | 1.98142                | $sp^{2.03}$ at N1<br>$sp^{2.19}$ at C11  | N1 (57.80%): $s(32.95\%)p(66.76\%)$<br>C11 (42.20%): $s(31.28\%)p(68.63\%)$  |
| $\sigma(C2-C5)$   | 1.98319                | $sp^{2.88}$ at C2<br>$sp^{2.24}$ at C5   | C2 (51.78%): $s(25.77\%)p(74.09\%)$<br>C5 (48.22%): $s(30.82\%)p(69.13\%)$   |
| $\sigma(C3-C5)$   | 1.97729                | $sp^{1.81}$ at C3<br>$sp^{1.79}$ at C5   | C3 (50.01%): $s(35.54\%)p(64.28\%)$<br>C5 (49.99%): $s(35.84\%)p(64.09\%)$   |
| $\sigma(C3-C6)$   | 1.98464                | $sp^{1.95}$ at C3<br>$sp^{1.67}$ at C6   | C3 (51.32%): $s(33.81\%)p(66.01\%)$<br>C6 (48.68%): $s(37.45\%)p(62.47\%)$   |
| $\pi(C3-C6)$      | 1.64303                | n/a                                      | C3 (67.50%): $s(0.01\%)p(99.92\%)$<br>C6 (32.50%): $s(0.00\%)p(99.90\%)$     |
| $\sigma(C6-C8)$   | 1.98589                | $sp^{2.13}$ at C6<br>$sp^{2.85}$ at C8   | C6 (47.64%): $s(31.95\%)p(67.99\%)$<br>C8 (52.36%): $s(25.92\%)p(73.92\%)$   |
| $\sigma(C6-O7)$   | 1.99325                | $sp^{2.25}$ at C6<br>$sp^{1.72}$ at O7   | C6 (35.73%): $s(30.69\%)p(69.20\%)$<br>O7 (64.27%): $s(36.67\%)p(62.89\%)$   |
| Lone pair 1 (O7)  | 1.95721                | n/a                                      | $s(56.20\%)p(43.73\%)$                                                       |
| Lone pair 2 (O7)  | 1.88895                | n/a                                      | $s(7.10\%)p(92.79\%)$                                                        |
| Lone pair 3 (O7)  | 1.57910                | n/a                                      | $s(0.01\%)p(99.80\%)$                                                        |
| $\sigma(C11-C12)$ | 1.97434                | $sp^{1.76}$ at C11<br>$sp^{1.93}$ at C12 | C11 (50.36%): $s(36.16\%)p(63.76\%)$<br>C12 (49.64%): $s(34.02\%)p(65.81\%)$ |
| $\pi(C11-C12)$    | 1.66436                | n/a                                      | C11 (46.82%): $s(0.01\%)p(99.91\%)$<br>C12 (53.18%): $s(0.04\%)p(99.89\%)$   |
| $\sigma(C11-C10)$ | 1.97210                | $sp^{2.08}$ at C11<br>$sp^{1.94}$ at C10 | C11 (49.18%): $s(32.47\%)p(67.42\%)$<br>C10 (50.82%): $s(34.00\%)p(65.88\%)$ |
| Lone pair 1 (N4)  | 1.88679                | $sp^{2.15}$                              | $s(31.69\%)p(68.27\%)$                                                       |
| $\sigma(N4-C9)$   | 1.98582                | $sp^{1.77}$ at N4<br>$sp^{1.98}$ at C9   | N4 (58.60%): $s(35.94\%)p(63.74\%)$<br>C9 (41.40%): $s(33.54\%)p(66.33\%)$   |
| $\pi(N4-C9)$      | 1.84223                | n/a                                      | N4 (61.44%): $s(0.00\%)p(99.82\%)$<br>C9 (38.56%): $s(0.00\%)p(99.88\%)$     |
| $\sigma(N4-C10)$  | 1.98174                | $sp^{2.09}$ at N4<br>$sp^{2.29}$ at C10  | N4 (57.83%): $s(32.23\%)p(67.46\%)$<br>C10 (42.17%): $s(30.40\%)p(69.49\%)$  |

<sup>a</sup> Calculated in gas phase at the optimized S0 geometry using O3LYP (gas phase/ def2-tzvpp def2/j). The O3LYP functional uses 11.61 % Hartree-Fock exchange.<sup>21</sup>

<sup>b</sup> The general formulation of a sigma natural bond orbital (NBO) is  $\sigma_{AB} = c_A h_A + c_B h_B$ , where  $h_A$  and  $h_B$  are the atom-centered hybrid orbitals of atoms A and B, and  $c_A$  and  $c_B$  are the normalized polarization coefficients of atoms A and B. If the natural ionicity of an NBO, given by  $i_{AB} = \frac{(c_A^2 - c_B^2)}{(c_A^2 + c_B^2)}$ , exceeds a fixed limit ( $|i_{AB}| > 0.95$ ), this extremely polarized “bond” is identified instead as a lone pair.<sup>20</sup>

<sup>c</sup> Orbital occupancy ( $0 \leq x \leq 2$ ) is the number of electrons in the specified NBO. Lower orbital occupancy values are indicative of stronger delocalization.<sup>20</sup>

<sup>d</sup> Hybridization of a given NBO is of the form  $sp^\lambda$ , where  $\lambda = (\frac{\%p}{\%s})$ .<sup>20</sup> Hybridizations with a very high value of  $\lambda$  (for example,  $sp^\infty$ ) have been denoted as non-applicable.

<sup>e</sup> Atomic orbital contributions denote the percent contribution of s, p, d, and f orbitals from atom A, and the percent contribution of s, p, d, and f orbitals from atom B, to their shared NBO  $\sigma_{AB}$  or  $\pi_{AB}$ .<sup>20</sup> Contributions from d and f orbitals are negligible and are omitted for simplicity. The percent contributions from each atom A ( $c_A^2 \times 100\%$ ) and B ( $c_B^2 \times 100\%$ ) to their shared NBO are also shown.

**Table S109.** NBO analysis<sup>a</sup> of (<sup>t</sup>BuL4)<sub>2</sub>Zn with the B3LYP functional.

| NBO <sup>b</sup>  | Occupancy <sup>c</sup> | Hybridization <sup>d</sup>               | Atomic Orbital Contributions (%) <sup>e</sup>                                |
|-------------------|------------------------|------------------------------------------|------------------------------------------------------------------------------|
| Lone pair 1 (N1)  | 1.84339                | $sp^{2.56}$                              | $s(28.04\%)p(71.91\%)$                                                       |
| $\sigma(N1-C5)$   | 1.98657                | $sp^{1.59}$ at N1<br>$sp^{2.01}$ at C5   | N1 (59.42%): $s(38.53\%)p(61.12\%)$<br>C5 (40.58%): $s(33.13\%)p(66.75\%)$   |
| $\pi(N1-C5)$      | 1.87655                | n/a                                      | N1 (70.27%): $s(0.15\%)p(99.71\%)$<br>C5 (29.73%): $s(0.16\%)p(99.69\%)$     |
| $\sigma(N1-C11)$  | 1.98176                | $sp^{2.01}$ at N1<br>$sp^{2.19}$ at C11  | N1 (57.93%): $s(33.15\%)p(66.54\%)$<br>C11 (42.07%): $s(31.28\%)p(68.62\%)$  |
| $\sigma(C2-C5)$   | 1.98358                | $sp^{2.85}$ at C2<br>$sp^{2.24}$ at C5   | C2 (51.72%): $s(25.95\%)p(73.89\%)$<br>C5 (48.28%): $s(30.82\%)p(69.11\%)$   |
| $\sigma(C3-C5)$   | 1.97760                | $sp^{1.80}$ at C3<br>$sp^{1.79}$ at C5   | C3 (49.98%): $s(35.58\%)p(64.22\%)$<br>C5 (50.02%): $s(35.85\%)p(64.06\%)$   |
| $\sigma(C3-C6)$   | 1.98460                | $sp^{1.95}$ at C3<br>$sp^{1.67}$ at C6   | C3 (51.26%): $s(33.86\%)p(65.94\%)$<br>C6 (48.74%): $s(37.44\%)p(62.47\%)$   |
| $\pi(C3-C6)$      | 1.64794                | n/a                                      | C3 (68.57%): $s(0.01\%)p(99.92\%)$<br>C6 (31.43%): $s(0.00\%)p(99.89\%)$     |
| $\sigma(C6-C8)$   | 1.98623                | $sp^{2.13}$ at C6<br>$sp^{2.83}$ at C8   | C6 (47.76%): $s(31.93\%)p(68.00\%)$<br>C8 (52.24%): $s(26.07\%)p(73.74\%)$   |
| $\sigma(C6-O7)$   | 1.99329                | $sp^{2.25}$ at C6<br>$sp^{1.68}$ at O7   | C6 (35.49%): $s(30.71\%)p(69.17\%)$<br>O7 (64.51%): $s(37.10\%)p(62.45\%)$   |
| Lone pair 1 (O7)  | 1.95715                | n/a                                      | $s(54.86\%)p(45.07\%)$                                                       |
| Lone pair 2 (O7)  | 1.89597                | n/a                                      | $s(8.02\%)p(91.88\%)$                                                        |
| Lone pair 3 (O7)  | 1.58856                | n/a                                      | $s(0.01\%)p(99.80\%)$                                                        |
| $\sigma(C11-C12)$ | 1.97479                | $sp^{1.76}$ at C11<br>$sp^{1.93}$ at C12 | C11 (50.35%): $s(36.15\%)p(63.76\%)$<br>C12 (49.65%): $s(34.09\%)p(65.72\%)$ |
| $\pi(C11-C12)$    | 1.66702                | n/a                                      | C11 (46.48%): $s(0.01\%)p(99.91\%)$<br>C12 (53.52%): $s(0.03\%)p(99.89\%)$   |
| $\sigma(C11-C10)$ | 1.97253                | $sp^{2.08}$ at C11<br>$sp^{1.94}$ at C10 | C11 (49.15%): $s(32.47\%)p(67.40\%)$<br>C10 (50.85%): $s(34.00\%)p(65.86\%)$ |
| Lone pair 1 (N4)  | 1.89182                | $sp^{2.21}$                              | $s(31.13\%)p(68.83\%)$                                                       |
| $\sigma(N4-C9)$   | 1.98580                | $sp^{1.75}$ at N4<br>$sp^{1.97}$ at C9   | N4 (58.70%): $s(36.20\%)p(63.47\%)$<br>C9 (41.30%): $s(33.60\%)p(66.27\%)$   |
| $\pi(N4-C9)$      | 1.84491                | n/a                                      | N4 (61.51%): $s(0.00\%)p(99.83\%)$<br>C9 (38.49%): $s(0.00\%)p(99.88\%)$     |
| $\sigma(N4-C10)$  | 1.98197                | $sp^{2.06}$ at N4<br>$sp^{2.29}$ at C10  | N4 (58.01%): $s(32.53\%)p(67.14\%)$<br>C10 (41.99%): $s(30.39\%)p(69.50\%)$  |

<sup>a</sup> Calculated in gas phase at the optimized S0 geometry using B3LYP (gas phase/ def2-tzvp def2/j). The B3LYP functional uses 20 % Hartree-Fock exchange.<sup>22</sup>

<sup>b</sup> The general formulation of a sigma natural bond orbital (NBO) is  $\sigma_{AB} = c_A h_A + c_B h_B$ , where  $h_A$  and  $h_B$  are the atom-centered hybrid orbitals of atoms A and B, and  $c_A$  and  $c_B$  are the normalized polarization coefficients of atoms A and B. If the natural ionicity of an NBO, given by  $i_{AB} = \frac{(c_A^2 - c_B^2)}{(c_A^2 + c_B^2)}$ , exceeds a fixed limit ( $|i_{AB}| > 0.95$ ), this extremely polarized “bond” is identified instead as a lone pair.<sup>20</sup>

<sup>c</sup> Orbital occupancy ( $0 \leq x \leq 2$ ) is the number of electrons in the specified NBO. Lower orbital occupancy values are indicative of stronger delocalization.<sup>20</sup>

<sup>d</sup> Hybridization of a given NBO is of the form  $sp^\lambda$ , where  $\lambda = (\frac{\%p}{\%s})$ .<sup>20</sup> Hybridizations with a very high value of  $\lambda$  (for example,  $sp^\infty$ ) have been denoted as non-applicable.

<sup>e</sup> Atomic orbital contributions denote the percent contribution of s, p, d, and f orbitals from atom A, and the percent contribution of s, p, d, and f orbitals from atom B, to their shared NBO  $\sigma_{AB}$  or  $\pi_{AB}$ .<sup>20</sup> Contributions from d and f orbitals are negligible and are omitted for simplicity. The percent contributions from each atom A ( $c_A^2 \times 100\%$ ) and B ( $c_B^2 \times 100\%$ ) to their shared NBO are also shown.

**Table S110.** NBO analysis<sup>a</sup> of (<sup>t</sup>BuL4)<sub>2</sub>Zn with the PBE0 functional.

| NBO <sup>b</sup>  | Occupancy <sup>c</sup> | Hybridization <sup>d</sup>               | Atomic Orbital Contributions (%) <sup>e</sup>                                |
|-------------------|------------------------|------------------------------------------|------------------------------------------------------------------------------|
| Lone pair 1 (N1)  | 1.84525                | $sp^{2.57}$                              | $s(28.03\%)p(71.92\%)$                                                       |
| $\sigma(N1-C5)$   | 1.98672                | $sp^{1.58}$ at N1<br>$sp^{2.01}$ at C5   | N1 (59.41%): $s(38.55\%)p(61.08\%)$<br>C5 (40.59%): $s(33.14\%)p(66.74\%)$   |
| $\pi(N1-C5)$      | 1.87778                | n/a                                      | N1 (70.51%): $s(0.16\%)p(99.69\%)$<br>C5 (29.49%): $s(0.17\%)p(99.66\%)$     |
| $\sigma(N1-C11)$  | 1.98186                | $sp^{2.01}$ at N1<br>$sp^{2.19}$ at C11  | N1 (57.84%): $s(33.12\%)p(66.56\%)$<br>C11 (42.16%): $s(31.30\%)p(68.61\%)$  |
| $\sigma(C2-C5)$   | 1.98363                | $sp^{2.86}$ at C2<br>$sp^{2.24}$ at C5   | C2 (51.76%): $s(25.88\%)p(73.97\%)$<br>C5 (48.24%): $s(30.80\%)p(69.14\%)$   |
| $\sigma(C3-C5)$   | 1.97766                | $sp^{1.81}$ at C3<br>$sp^{1.79}$ at C5   | C3 (50.04%): $s(35.56\%)p(64.24\%)$<br>C5 (49.96%): $s(35.87\%)p(64.05\%)$   |
| $\sigma(C3-C6)$   | 1.98477                | $sp^{1.95}$ at C3<br>$sp^{1.67}$ at C6   | C3 (51.38%): $s(33.83\%)p(65.97\%)$<br>C6 (48.62%): $s(37.44\%)p(62.47\%)$   |
| $\pi(C3-C6)$      | 1.64783                | n/a                                      | C3 (69.01%): $s(0.01\%)p(99.92\%)$<br>C6 (30.99%): $s(0.00\%)p(99.89\%)$     |
| $\sigma(C6-C8)$   | 1.98631                | $sp^{2.13}$ at C6<br>$sp^{2.84}$ at C8   | C6 (47.66%): $s(31.92\%)p(68.01\%)$<br>C8 (52.34%): $s(25.98\%)p(73.83\%)$   |
| $\sigma(C6-O7)$   | 1.99343                | $sp^{2.25}$ at C6<br>$sp^{1.69}$ at O7   | C6 (35.66%): $s(30.73\%)p(69.16\%)$<br>O7 (64.34%): $s(37.01\%)p(62.52\%)$   |
| Lone pair 1 (O7)  | 1.95789                | n/a                                      | $s(55.41\%)p(44.52\%)$                                                       |
| Lone pair 2 (O7)  | 1.89583                | n/a                                      | $s(7.55\%)p(92.34\%)$                                                        |
| Lone pair 3 (O7)  | 1.58841                | n/a                                      | $s(0.01\%)p(99.79\%)$                                                        |
| $\sigma(C11-C12)$ | 1.97485                | $sp^{1.76}$ at C11<br>$sp^{1.93}$ at C12 | C11 (50.32%): $s(36.15\%)p(63.76\%)$<br>C12 (49.68%): $s(34.06\%)p(65.75\%)$ |
| $\pi(C11-C12)$    | 1.66885                | n/a                                      | C11 (46.46%): $s(0.01\%)p(99.91\%)$<br>C12 (53.54%): $s(0.04\%)p(99.88\%)$   |
| $\sigma(C11-C10)$ | 1.97271                | $sp^{2.08}$ at C11<br>$sp^{1.94}$ at C10 | C11 (49.13%): $s(32.46\%)p(67.41\%)$<br>C10 (50.87%): $s(34.02\%)p(65.85\%)$ |
| Lone pair 1 (N4)  | 1.89264                | $sp^{2.19}$                              | $s(31.29\%)p(68.67\%)$                                                       |
| $\sigma(N4-C9)$   | 1.98600                | $sp^{1.76}$ at N4<br>$sp^{1.97}$ at C9   | N4 (58.63%): $s(36.10\%)p(63.56\%)$<br>C9 (41.37%): $s(33.60\%)p(66.27\%)$   |
| $\pi(N4-C9)$      | 1.84578                | n/a                                      | N4 (61.66%): $s(0.00\%)p(99.81\%)$<br>C9 (38.34%): $s(0.00\%)p(99.87\%)$     |
| $\sigma(N4-C10)$  | 1.98209                | $sp^{2.07}$ at N4<br>$sp^{2.29}$ at C10  | N4 (57.89%): $s(32.46\%)p(67.20\%)$<br>C10 (42.11%): $s(30.39\%)p(69.50\%)$  |

<sup>a</sup> Calculated in gas phase at the optimized S0 geometry using PBE0 (gas phase/ def2-tzvpp def2/j). The PBE0 functional uses 25 % Hartree-Fock exchange.<sup>14</sup>

<sup>b</sup> The general formulation of a sigma natural bond orbital (NBO) is  $\sigma_{AB} = c_A h_A + c_B h_B$ , where  $h_A$  and  $h_B$  are the atom-centered hybrid orbitals of atoms A and B, and  $c_A$  and  $c_B$  are the normalized polarization coefficients of atoms A and B. If the natural ionicity of an NBO, given by  $i_{AB} = \frac{(c_A^2 - c_B^2)}{(c_A^2 + c_B^2)}$ , exceeds a fixed limit ( $|i_{AB}| > 0.95$ ), this extremely polarized “bond” is identified instead as a lone pair.<sup>20</sup>

<sup>c</sup> Orbital occupancy ( $0 \leq x \leq 2$ ) is the number of electrons in the specified NBO. Lower orbital occupancy values are indicative of stronger delocalization.<sup>20</sup>

<sup>d</sup> Hybridization of a given NBO is of the form  $sp^\lambda$ , where  $\lambda = (\frac{\%p}{\%s})$ .<sup>20</sup> Hybridizations with a very high value of  $\lambda$  (for example,  $sp^\infty$ ) have been denoted as non-applicable.

<sup>e</sup> Atomic orbital contributions denote the percent contribution of s, p, d, and f orbitals from atom A, and the percent contribution of s, p, d, and f orbitals from atom B, to their shared NBO  $\sigma_{AB}$  or  $\pi_{AB}$ .<sup>20</sup> Contributions from d and f orbitals are negligible and are omitted for simplicity. The percent contributions from each atom A ( $c_A^2 \times 100\%$ ) and B ( $c_B^2 \times 100\%$ ) to their shared NBO are also shown.

**Table S111.** NBO analysis<sup>a</sup> of (<sup>t</sup>BuL4)<sub>2</sub>Zn with the M06 functional.

| NBO <sup>b</sup>  | Occupancy <sup>c</sup> | Hybridization <sup>d</sup>               | Atomic Orbital Contributions (%) <sup>e</sup>                                |
|-------------------|------------------------|------------------------------------------|------------------------------------------------------------------------------|
| Lone pair 1 (N1)  | 1.84204                | $sp^{2.55}$                              | $s(28.16\%)p(71.78\%)$                                                       |
| $\sigma(N1-C5)$   | 1.98652                | $sp^{1.60}$ at N1<br>$sp^{2.02}$ at C5   | N1 (59.66%): $s(38.39\%)p(61.31\%)$<br>C5 (40.34%): $s(33.10\%)p(66.81\%)$   |
| $\pi(N1-C5)$      | 1.87994                | n/a                                      | N1 (71.47%): $s(0.19\%)p(99.65\%)$<br>C5 (28.53%): $s(0.20\%)p(99.62\%)$     |
| $\sigma(N1-C11)$  | 1.98155                | $sp^{2.01}$ at N1<br>$sp^{2.20}$ at C11  | N1 (58.18%): $s(33.14\%)p(66.60\%)$<br>C11 (41.82%): $s(31.23\%)p(68.69\%)$  |
| $\sigma(C2-C5)$   | 1.98337                | $sp^{2.83}$ at C2<br>$sp^{2.25}$ at C5   | C2 (51.92%): $s(26.06\%)p(73.79\%)$<br>C5 (48.08%): $s(30.79\%)p(69.14\%)$   |
| $\sigma(C3-C5)$   | 1.97737                | $sp^{1.80}$ at C3<br>$sp^{1.78}$ at C5   | C3 (50.06%): $s(35.65\%)p(64.17\%)$<br>C5 (49.94%): $s(35.88\%)p(64.04\%)$   |
| $\sigma(C3-C6)$   | 1.98483                | $sp^{1.94}$ at C3<br>$sp^{1.67}$ at C6   | C3 (51.40%): $s(33.92\%)p(65.90\%)$<br>C6 (48.60%): $s(37.44\%)p(62.47\%)$   |
| $\pi(C3-C6)$      | 1.64874                | n/a                                      | C3 (70.17%): $s(0.01\%)p(99.92\%)$<br>C6 (29.83%): $s(0.01\%)p(99.88\%)$     |
| $\sigma(C6-C8)$   | 1.98614                | $sp^{2.14}$ at C6<br>$sp^{2.82}$ at C8   | C6 (47.49%): $s(31.86\%)p(68.06\%)$<br>C8 (52.51%): $s(26.13\%)p(73.69\%)$   |
| $\sigma(C6-O7)$   | 1.99341                | $sp^{2.25}$ at C6<br>$sp^{1.70}$ at O7   | C6 (35.27%): $s(30.77\%)p(69.14\%)$<br>O7 (64.73%): $s(36.84\%)p(62.74\%)$   |
| Lone pair 1 (O7)  | 1.95878                | n/a                                      | $s(55.54\%)p(44.39\%)$                                                       |
| Lone pair 2 (O7)  | 1.89473                | n/a                                      | $s(7.59\%)p(92.30\%)$                                                        |
| Lone pair 3 (O7)  | 1.59620                | n/a                                      | $s(0.01\%)p(99.78\%)$                                                        |
| $\sigma(C11-C12)$ | 1.97446                | $sp^{1.76}$ at C11<br>$sp^{1.92}$ at C12 | C11 (50.20%): $s(36.16\%)p(63.76\%)$<br>C12 (49.80%): $s(34.16\%)p(65.68\%)$ |
| $\pi(C11-C12)$    | 1.66961                | n/a                                      | C11 (45.93%): $s(0.02\%)p(99.90\%)$<br>C12 (54.07%): $s(0.04\%)p(99.88\%)$   |
| $\sigma(C11-C10)$ | 1.97217                | $sp^{2.07}$ at C11<br>$sp^{1.93}$ at C10 | C11 (49.14%): $s(32.52\%)p(67.36\%)$<br>C10 (50.86%): $s(34.06\%)p(65.81\%)$ |
| Lone pair 1 (N4)  | 1.89090                | $sp^{1.90}$                              | $s(31.23\%)p(68.71\%)$                                                       |
| $\sigma(N4-C9)$   | 1.98565                | $sp^{1.76}$ at N4<br>$sp^{1.97}$ at C9   | N4 (58.77%): $s(36.08\%)p(63.63\%)$<br>C9 (41.23%): $s(33.67\%)p(66.24\%)$   |
| $\pi(N4-C9)$      | 1.85015                | n/a                                      | N4 (62.04%): $s(0.00\%)p(99.80\%)$<br>C9 (37.96%): $s(0.00\%)p(99.86\%)$     |
| $\sigma(N4-C10)$  | 1.98154                | $sp^{2.06}$ at N4<br>$sp^{2.30}$ at C10  | N4 (58.25%): $s(32.56\%)p(67.14\%)$<br>C10 (41.75%): $s(30.32\%)p(69.59\%)$  |

<sup>a</sup> Calculated in gas phase at the optimized S0 geometry using M06 (gas phase/ def2-tzvpp def2/j). The M06 functional uses 27 % Hartree-Fock exchange.<sup>23</sup>

<sup>b</sup> The general formulation of a sigma natural bond orbital (NBO) is  $\sigma_{AB} = c_A h_A + c_B h_B$ , where  $h_A$  and  $h_B$  are the atom-centered hybrid orbitals of atoms A and B, and  $c_A$  and  $c_B$  are the normalized polarization coefficients of atoms A and B. If the natural ionicity of an NBO, given by  $i_{AB} = \frac{(c_A^2 - c_B^2)}{(c_A^2 + c_B^2)}$ , exceeds a fixed limit ( $|i_{AB}| > 0.95$ ), this extremely polarized “bond” is identified instead as a lone pair.<sup>20</sup>

<sup>c</sup> Orbital occupancy ( $0 \leq x \leq 2$ ) is the number of electrons in the specified NBO. Lower orbital occupancy values are indicative of stronger delocalization.<sup>20</sup>

<sup>d</sup> Hybridization of a given NBO is of the form  $sp^\lambda$ , where  $\lambda = (\frac{\%p}{\%s})$ .<sup>20</sup> Hybridizations with a very high value of  $\lambda$  (for example,  $sp^\infty$ ) have been denoted as non-applicable.

<sup>e</sup> Atomic orbital contributions denote the percent contribution of s, p, d, and f orbitals from atom A, and the percent contribution of s, p, d, and f orbitals from atom B, to their shared NBO  $\sigma_{AB}$  or  $\pi_{AB}$ .<sup>20</sup> Contributions from d and f orbitals are negligible and are omitted for simplicity. The percent contributions from each atom A ( $c_A^2 \times 100\%$ ) and B ( $c_B^2 \times 100\%$ ) to their shared NBO are also shown.

**Table S112.** NBO analysis<sup>a</sup> of (<sup>t</sup>BuL4)<sub>2</sub>Zn with the M06-2X functional.

| NBO <sup>b</sup>  | Occupancy <sup>c</sup> | Hybridization <sup>d</sup>               | Atomic Orbital Contributions (%) <sup>e</sup>                                |
|-------------------|------------------------|------------------------------------------|------------------------------------------------------------------------------|
| Lone pair 1 (N1)  | 1.86136                | $sp^{2.65}$                              | $s(27.38\%)p(72.57\%)$                                                       |
| $\sigma(N1-C5)$   | 1.98663                | $sp^{1.56}$ at N1<br>$sp^{2.02}$ at C5   | N1 (59.57%): $s(38.94\%)p(60.71\%)$<br>C5 (40.43%): $s(33.04\%)p(66.86\%)$   |
| $\pi(N1-C5)$      | 1.88457                | n/a                                      | N1 (70.99%): $s(0.18\%)p(99.65\%)$<br>C5 (29.01%): $s(0.18\%)p(99.65\%)$     |
| $\sigma(N1-C11)$  | 1.98194                | $sp^{1.99}$ at N1<br>$sp^{2.19}$ at C11  | N1 (57.94%): $s(33.39\%)p(66.31\%)$<br>C11 (42.06%): $s(31.29\%)p(68.63\%)$  |
| $\sigma(C2-C5)$   | 1.98392                | $sp^{2.85}$ at C2<br>$sp^{2.24}$ at C5   | C2 (51.63%): $s(25.93\%)p(73.93\%)$<br>C5 (48.37%): $s(30.88\%)p(69.07\%)$   |
| $\sigma(C3-C5)$   | 1.97766                | $sp^{1.81}$ at C3<br>$sp^{1.78}$ at C5   | C3 (49.97%): $s(35.56\%)p(64.26\%)$<br>C5 (50.03%): $s(35.90\%)p(64.02\%)$   |
| $\sigma(C3-C6)$   | 1.98435                | $sp^{1.95}$ at C3<br>$sp^{1.67}$ at C6   | C3 (51.34%): $s(33.83\%)p(65.98\%)$<br>C6 (48.66%): $s(37.46\%)p(62.46\%)$   |
| $\pi(C3-C6)$      | 1.65426                | n/a                                      | C3 (70.55%): $s(0.01\%)p(99.92\%)$<br>C6 (29.45%): $s(0.00\%)p(99.88\%)$     |
| $\sigma(C6-C8)$   | 1.98667                | $sp^{2.13}$ at C6<br>$sp^{2.84}$ at C8   | C6 (47.84%): $s(31.96\%)p(67.98\%)$<br>C8 (52.16%): $s(25.98\%)p(73.85\%)$   |
| $\sigma(C6-O7)$   | 1.99376                | $sp^{2.26}$ at C6<br>$sp^{1.63}$ at O7   | C6 (35.42%): $s(30.68\%)p(69.23\%)$<br>O7 (64.58%): $s(37.82\%)p(61.71\%)$   |
| Lone pair 1 (O7)  | 1.95796                | n/a                                      | $s(54.90\%)p(45.02\%)$                                                       |
| Lone pair 2 (O7)  | 1.90938                | n/a                                      | $s(7.26\%)p(92.63\%)$                                                        |
| Lone pair 3 (O7)  | 1.59601                | n/a                                      | $s(0.01\%)p(99.77\%)$                                                        |
| $\sigma(C11-C12)$ | 1.97522                | $sp^{1.76}$ at C11<br>$sp^{1.93}$ at C12 | C11 (50.36%): $s(36.19\%)p(63.72\%)$<br>C12 (49.64%): $s(34.08\%)p(65.74\%)$ |
| $\pi(C11-C12)$    | 1.67593                | n/a                                      | C11 (46.24%): $s(0.02\%)p(99.91\%)$<br>C12 (53.76%): $s(0.04\%)p(99.88\%)$   |
| $\sigma(C11-C10)$ | 1.97309                | $sp^{2.08}$ at C11<br>$sp^{1.93}$ at C10 | C11 (49.07%): $s(32.43\%)p(67.45\%)$<br>C10 (50.93%): $s(34.03\%)p(65.84\%)$ |
| Lone pair 1 (N4)  | 1.90351                | $sp^{2.26}$                              | $s(30.65\%)p(69.31\%)$                                                       |
| $\sigma(N4-C9)$   | 1.98599                | $sp^{1.74}$ at N4<br>$sp^{1.97}$ at C9   | N4 (58.80%): $s(36.42\%)p(63.25\%)$<br>C9 (41.20%): $s(33.58\%)p(66.31\%)$   |
| $\pi(N4-C9)$      | 1.85275                | n/a                                      | N4 (61.50%): $s(0.00\%)p(99.78\%)$<br>C9 (38.50%): $s(0.00\%)p(99.87\%)$     |
| $\sigma(N4-C10)$  | 1.98206                | $sp^{2.04}$ at N4<br>$sp^{2.29}$ at C10  | N4 (58.11%): $s(32.81\%)p(66.87\%)$<br>C10 (41.89%): $s(30.35\%)p(69.56\%)$  |

<sup>a</sup> Calculated in gas phase at the optimized S0 geometry using M06-2X (gas phase/ def2-tzvpp def2/j). The M06-2X functional uses 54 % Hartree-Fock exchange.<sup>23</sup>

<sup>b</sup> The general formulation of a sigma natural bond orbital (NBO) is  $\sigma_{AB} = c_A h_A + c_B h_B$ , where  $h_A$  and  $h_B$  are the atom-centered hybrid orbitals of atoms A and B, and  $c_A$  and  $c_B$  are the normalized polarization coefficients of atoms A and B. If the natural ionicity of an NBO, given by  $i_{AB} = \frac{(c_A^2 - c_B^2)}{(c_A^2 + c_B^2)}$ , exceeds a fixed limit ( $|i_{AB}| > 0.95$ ), this extremely polarized “bond” is identified instead as a lone pair.<sup>20</sup>

<sup>c</sup> Orbital occupancy ( $0 \leq x \leq 2$ ) is the number of electrons in the specified NBO. Lower orbital occupancy values are indicative of stronger delocalization.<sup>20</sup>

<sup>d</sup> Hybridization of a given NBO is of the form  $sp^\lambda$ , where  $\lambda = (\frac{\%p}{\%s})$ .<sup>20</sup> Hybridizations with a very high value of  $\lambda$  (for example,  $sp^\infty$ ) have been denoted as non-applicable.

<sup>e</sup> Atomic orbital contributions denote the percent contribution of s, p, d, and f orbitals from atom A, and the percent contribution of s, p, d, and f orbitals from atom B, to their shared NBO  $\sigma_{AB}$  or  $\pi_{AB}$ .<sup>20</sup> Contributions from d and f orbitals are negligible and are omitted for simplicity. The percent contributions from each atom A ( $c_A^2 \times 100\%$ ) and B ( $c_B^2 \times 100\%$ ) to their shared NBO are also shown.

**Table S113.** NBO analysis<sup>a</sup> of (<sup>t</sup>BuL4)<sub>2</sub>Zn with the CAM-B3LYP functional.

| NBO <sup>b</sup>  | Occupancy <sup>c</sup> | Hybridization <sup>d</sup>               | Atomic Orbital Contributions (%) <sup>e</sup>                                |
|-------------------|------------------------|------------------------------------------|------------------------------------------------------------------------------|
| Lone pair 1 (N1)  | 1.85169                | $sp^{2.67}$                              | $s(27.21\%)p(72.74\%)$                                                       |
| $\sigma(N1-C5)$   | 1.98665                | $sp^{1.56}$ at N1<br>$sp^{2.02}$ at C5   | N1 (59.44%): $s(38.96\%)p(60.67\%)$<br>C5 (40.56%): $s(33.07\%)p(66.80\%)$   |
| $\pi(N1-C5)$      | 1.88627                | n/a                                      | N1 (71.41%): $s(0.18\%)p(99.67\%)$<br>C5 (28.59%): $s(0.16\%)p(99.67\%)$     |
| $\sigma(N1-C11)$  | 1.98218                | $sp^{1.97}$ at N1<br>$sp^{2.19}$ at C11  | N1 (57.90%): $s(33.52\%)p(66.16\%)$<br>C11 (42.10%): $s(31.27\%)p(68.63\%)$  |
| $\sigma(C2-C5)$   | 1.98395                | $sp^{2.83}$ at C2<br>$sp^{2.24}$ at C5   | C2 (51.74%): $s(26.08\%)p(73.75\%)$<br>C5 (48.26%): $s(30.87\%)p(69.06\%)$   |
| $\sigma(C3-C5)$   | 1.97764                | $sp^{1.80}$ at C3<br>$sp^{1.79}$ at C5   | C3 (49.99%): $s(35.59\%)p(64.20\%)$<br>C5 (50.01%): $s(35.87\%)p(64.04\%)$   |
| $\sigma(C3-C6)$   | 1.98437                | $sp^{1.95}$ at C3<br>$sp^{1.67}$ at C6   | C3 (51.27%): $s(33.86\%)p(65.93\%)$<br>C6 (48.73%): $s(37.48\%)p(62.43\%)$   |
| $\pi(C3-C6)$      | 1.65833                | n/a                                      | C3 (70.48%): $s(0.01\%)p(99.92\%)$<br>C6 (29.52%): $s(0.00\%)p(99.88\%)$     |
| $\sigma(C6-C8)$   | 1.98662                | $sp^{2.13}$ at C6<br>$sp^{2.82}$ at C8   | C6 (47.77%): $s(31.95\%)p(67.97\%)$<br>C8 (52.23%): $s(26.14\%)p(73.66\%)$   |
| $\sigma(C6-O7)$   | 1.99343                | $sp^{2.26}$ at C6<br>$sp^{1.64}$ at O7   | C6 (35.49%): $s(30.65\%)p(69.23\%)$<br>O7 (64.51%): $s(37.76\%)p(61.77\%)$   |
| Lone pair 1 (O7)  | 1.95703                | n/a                                      | $s(53.19\%)p(46.73\%)$                                                       |
| Lone pair 2 (O7)  | 1.90255                | n/a                                      | $s(9.02\%)p(90.87\%)$                                                        |
| Lone pair 3 (O7)  | 1.59672                | n/a                                      | $s(0.01\%)p(99.79\%)$                                                        |
| $\sigma(C11-C12)$ | 1.97496                | $sp^{1.76}$ at C11<br>$sp^{1.92}$ at C12 | C11 (50.30%): $s(36.17\%)p(63.74\%)$<br>C12 (49.70%): $s(34.13\%)p(65.67\%)$ |
| $\pi(C11-C12)$    | 1.67659                | n/a                                      | C11 (46.01%): $s(0.01\%)p(99.90\%)$<br>C12 (53.99%): $s(0.03\%)p(99.88\%)$   |
| $\sigma(C11-C10)$ | 1.97314                | $sp^{2.08}$ at C11<br>$sp^{1.93}$ at C10 | C11 (49.08%): $s(32.45\%)p(67.41\%)$<br>C10 (50.92%): $s(34.04\%)p(65.82\%)$ |
| Lone pair 1 (N4)  | 1.89761                | $sp^{2.28}$                              | $s(30.44\%)p(69.52\%)$                                                       |
| $\sigma(N4-C9)$   | 1.98573                | $sp^{1.73}$ at N4<br>$sp^{1.97}$ at C9   | N4 (58.66%): $s(36.48\%)p(63.17\%)$<br>C9 (41.34%): $s(33.61\%)p(66.25\%)$   |
| $\pi(N4-C9)$      | 1.85412                | n/a                                      | N4 (61.70%): $s(0.00\%)p(99.81\%)$<br>C9 (38.30%): $s(0.00\%)p(99.87\%)$     |
| $\sigma(N4-C10)$  | 1.98225                | $sp^{2.03}$ at N4<br>$sp^{2.29}$ at C10  | N4 (58.04%): $s(32.94\%)p(66.71\%)$<br>C10 (41.96%): $s(30.32\%)p(69.56\%)$  |

<sup>a</sup> Calculated in gas phase at the optimized S0 geometry using CAM-B3LYP (gas phase/ def2-tzvpp def2/j). The CAM-B3LYP functional is a range-separated functional, and uses 19 % Hartree-Fock exchange at short range, 33 % Hartree-Fock exchange at intermediate range, and 65 % Hartree-Fock exchange at long range.<sup>15</sup>

<sup>b</sup> The general formulation of a sigma natural bond orbital (NBO) is  $\sigma_{AB} = c_A h_A + c_B h_B$ , where  $h_A$  and  $h_B$  are the atom-centered hybrid orbitals of atoms A and B, and  $c_A$  and  $c_B$  are the normalized polarization coefficients of atoms A and B. If the natural ionicity of an NBO, given by  $i_{AB} = \frac{(c_A^2 - c_B^2)}{(c_A^2 + c_B^2)}$ , exceeds a fixed limit ( $|i_{AB}| > 0.95$ ), this extremely polarized “bond” is identified instead as a lone pair.<sup>20</sup>

<sup>c</sup> Orbital occupancy ( $0 \leq x \leq 2$ ) is the number of electrons in the specified NBO. Lower orbital occupancy values are indicative of stronger delocalization.<sup>20</sup>

<sup>d</sup> Hybridization of a given NBO is of the form  $sp^\lambda$ , where  $\lambda = \left(\frac{\%p}{\%s}\right)$ .<sup>20</sup> Hybridizations with a very high value of  $\lambda$  (for example,  $sp^\infty$ ) have been denoted as non-applicable.

<sup>e</sup> Atomic orbital contributions denote the percent contribution of s, p, d, and f orbitals from atom A, and the percent contribution of s, p, d, and f orbitals from atom B, to their shared NBO  $\sigma_{AB}$  or  $\pi_{AB}$ .<sup>20</sup> Contributions from d and f orbitals are negligible and are omitted for simplicity. The percent contributions from each atom A ( $c_A^2 \times 100\%$ ) and B ( $c_B^2 \times 100\%$ ) to their shared NBO are also shown.

**Table S114.** NBO analysis<sup>a</sup> of (MeL4)<sub>2</sub>Zn with the M06-L functional.

| NBO <sup>b</sup>  | Occupancy <sup>c</sup> | Hybridization <sup>d</sup>               | Atomic Orbital Contributions (%) <sup>e</sup>                                |
|-------------------|------------------------|------------------------------------------|------------------------------------------------------------------------------|
| Lone pair 1 (N1)  | 1.83925                | $sp^{2.31}$                              | $s(30.22\%)p(69.73\%)$                                                       |
| $\sigma(N1-C5)$   | 1.98656                | $sp^{1.67}$ at N1<br>$sp^{2.02}$ at C5   | N1 (59.70%): $s(37.36\%)p(62.33\%)$<br>C5 (40.30%): $s(33.05\%)p(66.86\%)$   |
| $\pi(N1-C5)$      | 1.86924                | n/a                                      | N1 (70.04%): $s(0.18\%)p(99.67\%)$<br>C5 (29.96%): $s(0.25\%)p(99.58\%)$     |
| $\sigma(N1-C11)$  | 1.98131                | $sp^{2.11}$ at N1<br>$sp^{2.20}$ at C11  | N1 (58.20%): $s(32.11\%)p(67.61\%)$<br>C11 (41.80%): $s(31.25\%)p(68.67\%)$  |
| $\sigma(C2-C5)$   | 1.98378                | $sp^{2.85}$ at C2<br>$sp^{2.26}$ at C5   | C2 (52.06%): $s(25.96\%)p(73.90\%)$<br>C5 (47.94%): $s(30.64\%)p(69.29\%)$   |
| $\sigma(C3-C5)$   | 1.97835                | $sp^{1.80}$ at C3<br>$sp^{1.77}$ at C5   | C3 (50.14%): $s(35.60\%)p(64.21\%)$<br>C5 (49.86%): $s(36.02\%)p(63.88\%)$   |
| $\sigma(C3-C6)$   | 1.98586                | $sp^{1.94}$ at C3<br>$sp^{1.66}$ at C6   | C3 (51.43%): $s(33.91\%)p(65.89\%)$<br>C6 (48.57%): $s(37.51\%)p(62.39\%)$   |
| $\pi(C3-C6)$      | 1.64456                | n/a                                      | C3 (67.94%): $s(0.01\%)p(99.91\%)$<br>C6 (32.06%): $s(0.01\%)p(99.89\%)$     |
| $\sigma(C6-C8)$   | 1.98636                | $sp^{2.13}$ at C6<br>$sp^{2.83}$ at C8   | C6 (47.33%): $s(31.87\%)p(68.04\%)$<br>C8 (52.67%): $s(26.03\%)p(73.79\%)$   |
| $\sigma(C6-O7)$   | 1.99333                | $sp^{2.26}$ at C6<br>$sp^{1.80}$ at O7   | C6 (35.29%): $s(30.67\%)p(69.23\%)$<br>O7 (64.71%): $s(35.58\%)p(64.00\%)$   |
| Lone pair 1 (O7)  | 1.95994                | n/a                                      | $s(58.03\%)p(41.91\%)$                                                       |
| Lone pair 2 (O7)  | 1.89028                | n/a                                      | $s(6.36\%)p(93.54\%)$                                                        |
| Lone pair 3 (O7)  | 1.58082                | n/a                                      | $s(0.01\%)p(99.80\%)$                                                        |
| $\sigma(C11-C12)$ | 1.97599                | $sp^{1.78}$ at C11<br>$sp^{1.92}$ at C12 | C11 (50.19%): $s(35.96\%)p(63.94\%)$<br>C12 (49.81%): $s(34.17\%)p(65.65\%)$ |
| $\pi(C11-C12)$    | 1.65857                | n/a                                      | C11 (46.25%): $s(0.02\%)p(99.89\%)$<br>C12 (53.75%): $s(0.05\%)p(99.86\%)$   |
| $\sigma(C11-C10)$ | 1.97296                | $sp^{2.05}$ at C11<br>$sp^{1.93}$ at C10 | C11 (49.16%): $s(32.70\%)p(67.17\%)$<br>C10 (50.84%): $s(34.08\%)p(65.77\%)$ |
| Lone pair 1 (N4)  | 1.88961                | $sp^{2.03}$                              | $s(33.00\%)p(66.96\%)$                                                       |
| $\sigma(N4-C9)$   | 1.98610                | $sp^{1.83}$ at N4<br>$sp^{1.98}$ at C9   | N4 (58.78%): $s(35.28\%)p(64.42\%)$<br>C9 (41.22%): $s(33.57\%)p(66.33\%)$   |
| $\pi(N4-C9)$      | 1.84264                | n/a                                      | N4 (61.25%): $s(0.00\%)p(99.83\%)$<br>C9 (38.75%): $s(0.00\%)p(99.86\%)$     |
| $\sigma(N4-C10)$  | 1.98154                | $sp^{2.16}$ at N4<br>$sp^{2.30}$ at C10  | N4 (58.23%): $s(31.59\%)p(68.11\%)$<br>C10 (41.77%): $s(30.31\%)p(69.60\%)$  |

<sup>a</sup> Calculated in gas phase at the optimized S0 geometry using M06-L (gas phase/ def2-tzvp def2/j). The M06-L functional uses 0 % Hartree-Fock exchange.<sup>19</sup>

<sup>b</sup> The general formulation of a sigma natural bond orbital (NBO) is  $\sigma_{AB} = c_A h_A + c_B h_B$ , where  $h_A$  and  $h_B$  are the atom-centered hybrid orbitals of atoms A and B, and  $c_A$  and  $c_B$  are the normalized polarization coefficients of atoms A and B. If the natural ionicity of an NBO, given by  $i_{AB} = \frac{(c_A^2 - c_B^2)}{(c_A^2 + c_B^2)}$ , exceeds a fixed limit ( $|i_{AB}| > 0.95$ ), this extremely polarized “bond” is identified instead as a lone pair.<sup>20</sup>

<sup>c</sup> Orbital occupancy ( $0 \leq x \leq 2$ ) is the number of electrons in the specified NBO. Lower orbital occupancy values are indicative of stronger delocalization.<sup>20</sup>

<sup>d</sup> Hybridization of a given NBO is of the form  $sp^\lambda$ , where  $\lambda = (\frac{\%p}{\%s})$ .<sup>20</sup> Hybridizations with a very high value of  $\lambda$  (for example,  $sp^\infty$ ) have been denoted as non-applicable.

<sup>e</sup> Atomic orbital contributions denote the percent contribution of s, p, d, and f orbitals from atom A, and the percent contribution of s, p, d, and f orbitals from atom B, to their shared NBO  $\sigma_{AB}$  or  $\pi_{AB}$ .<sup>20</sup> Contributions from d and f orbitals are negligible and are omitted for simplicity. The percent contributions from each atom A ( $c_A^2 \times 100\%$ ) and B ( $c_B^2 \times 100\%$ ) to their shared NBO are also shown.















## NMR spectra

ALK-02-169-C4H.10.fid  
CF3guan prolignand clean  
PROTON CDCl3 {D:\nmrdata\user\Herbert} Herbert 11

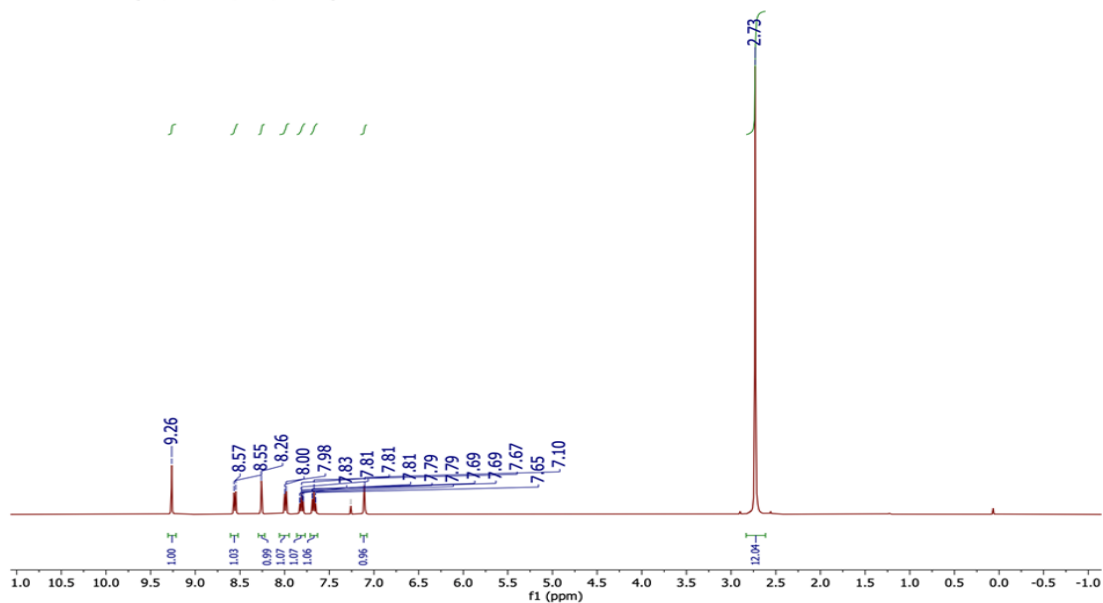

**Figure S28.** <sup>1</sup>H NMR (400 MHz, CDCl<sub>3</sub>, 22 °C) of (4-tetramethylguanidino)(2-trifluoromethyl)phenanthridine (**CF<sub>3</sub>L1**).

ALK-02-169-C4F.12.fid  
CF3guan prolignand clean  
F19 CDCl3 {D:\nmrdata\user\Herbert} Herbert 11

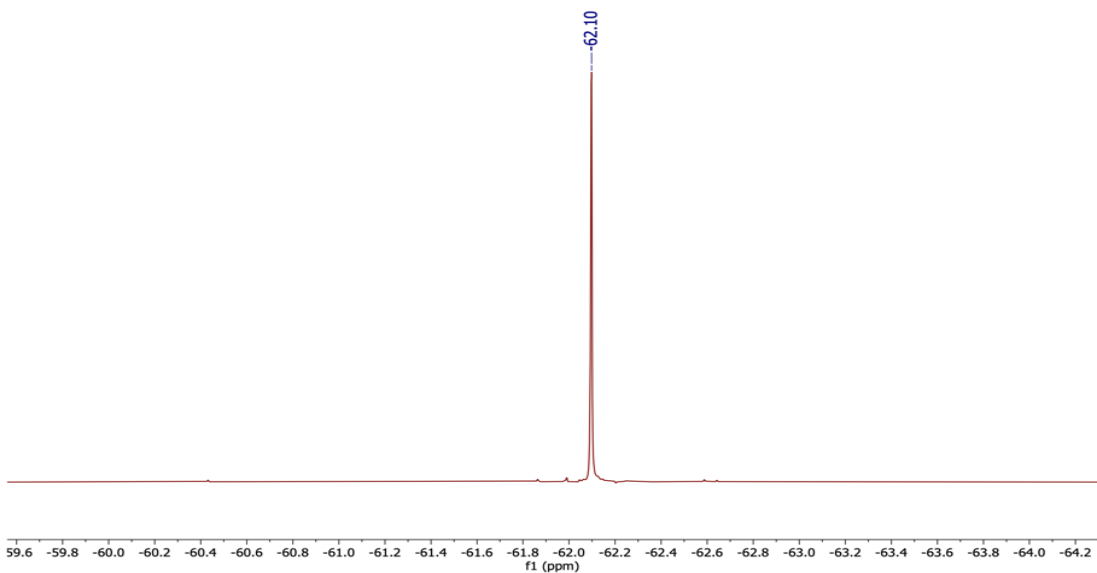

**Figure S29.** <sup>19</sup>F{<sup>1</sup>H} NMR (377 MHz, CDCl<sub>3</sub>, 22 °C) of (4-tetramethylguanidino)(2-trifluoromethyl)phenanthridine (**CF<sub>3</sub>L1**).

ALK-02-169-C4C.14.fid  
CF3guan prolifand clean  
C13CPD CDCl3 {D:\nmrdata\user\Herbert} Herbert 11

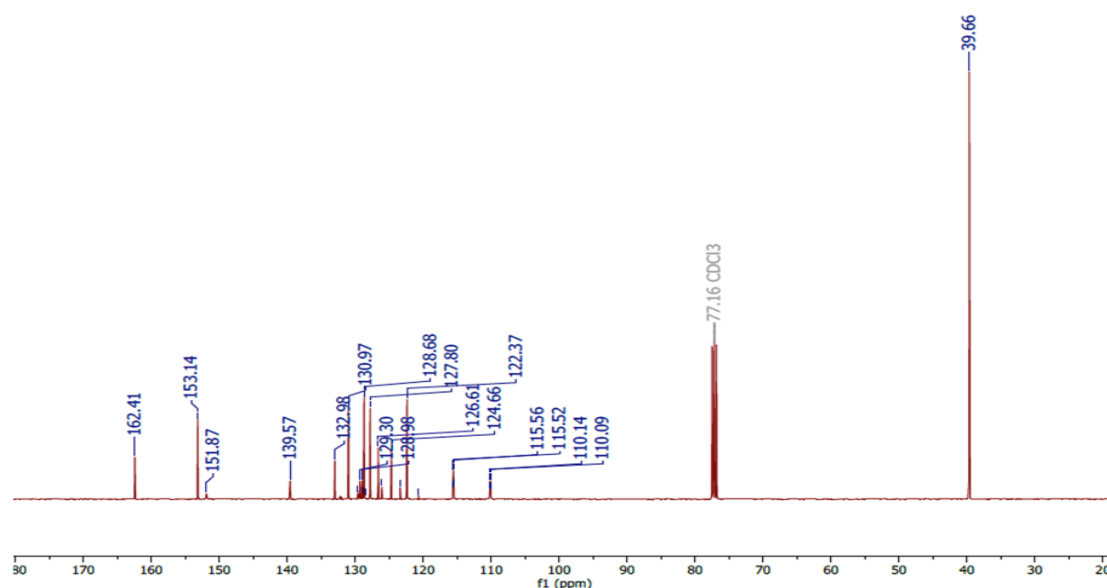

**Figure S30.**  $^{13}\text{C}$  NMR (101 MHz,  $\text{CDCl}_3$ , 22 °C) of (4-tetramethylguanidino)(2-trifluoromethyl)phenanthridine ( $\text{CF}_3\text{L1}$ ).

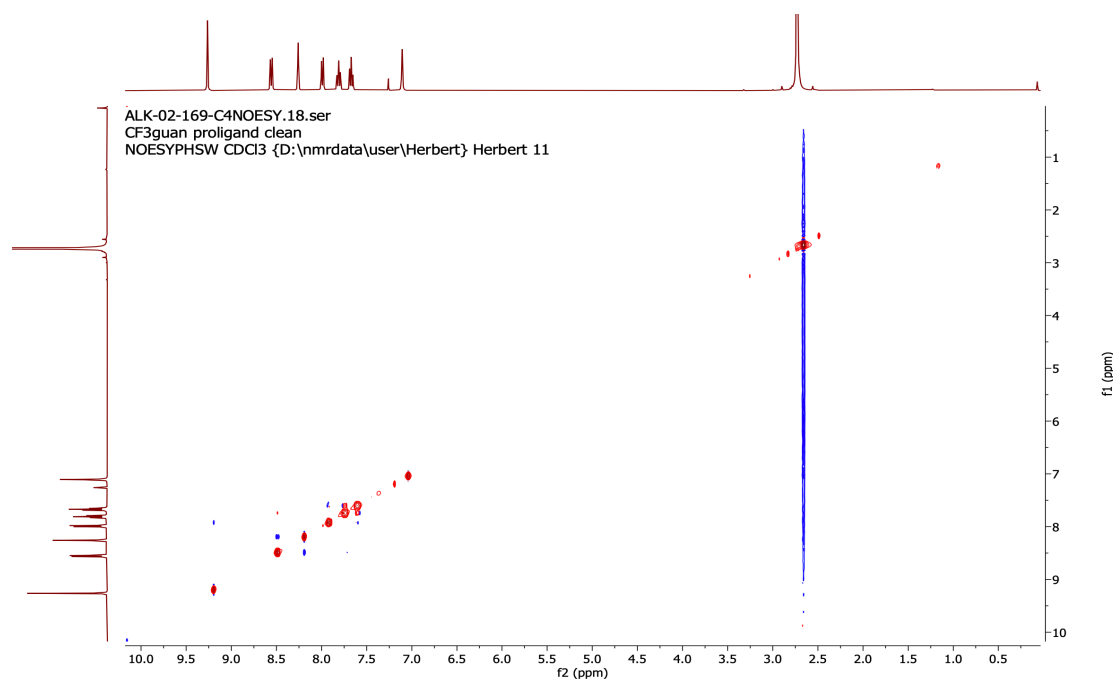

**Figure S31.**  $^1\text{H}$ - $^{13}\text{C}$  HSQC NMR (101 MHz,  $\text{CDCl}_3$ , 22 °C) of (4-tetramethylguanidino)(2-trifluoromethyl)phenanthridine ( $\text{CF}_3\text{L1}$ ).

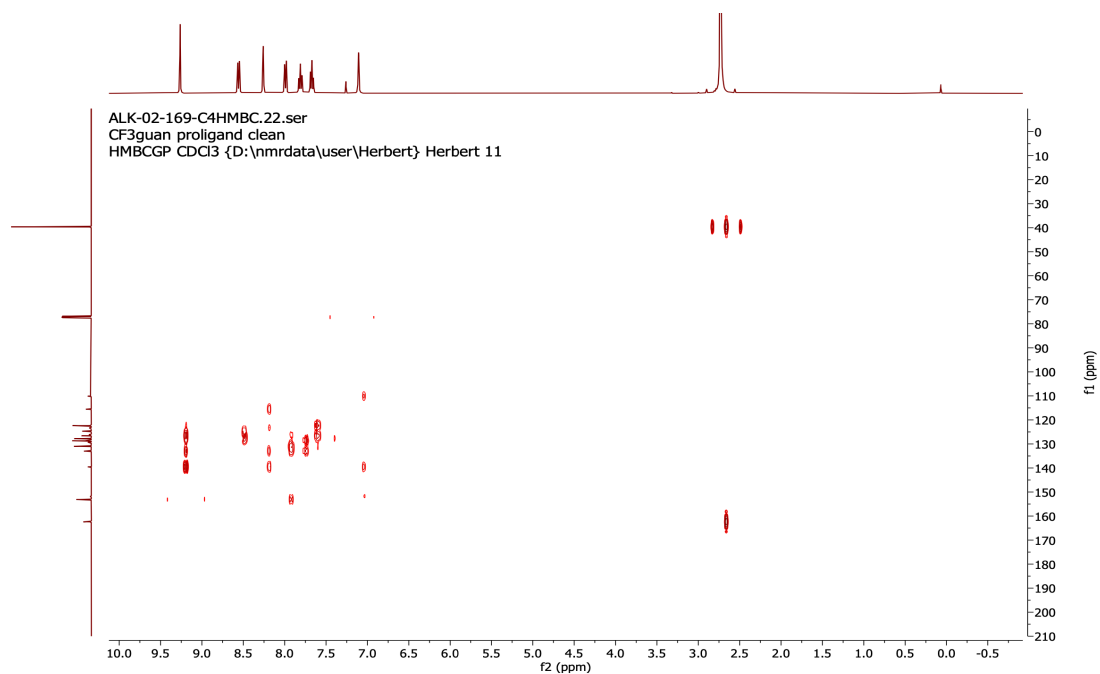

**Figure S32.**  $^1\text{H}$ - $^{13}\text{C}$  HMBC NMR (101 MHz,  $\text{CDCl}_3$ , 22 °C) of (4-tetramethylguanidino)(2-trifluoromethyl)phenanthridine ( $\text{CF}_3\text{L1}$ ).

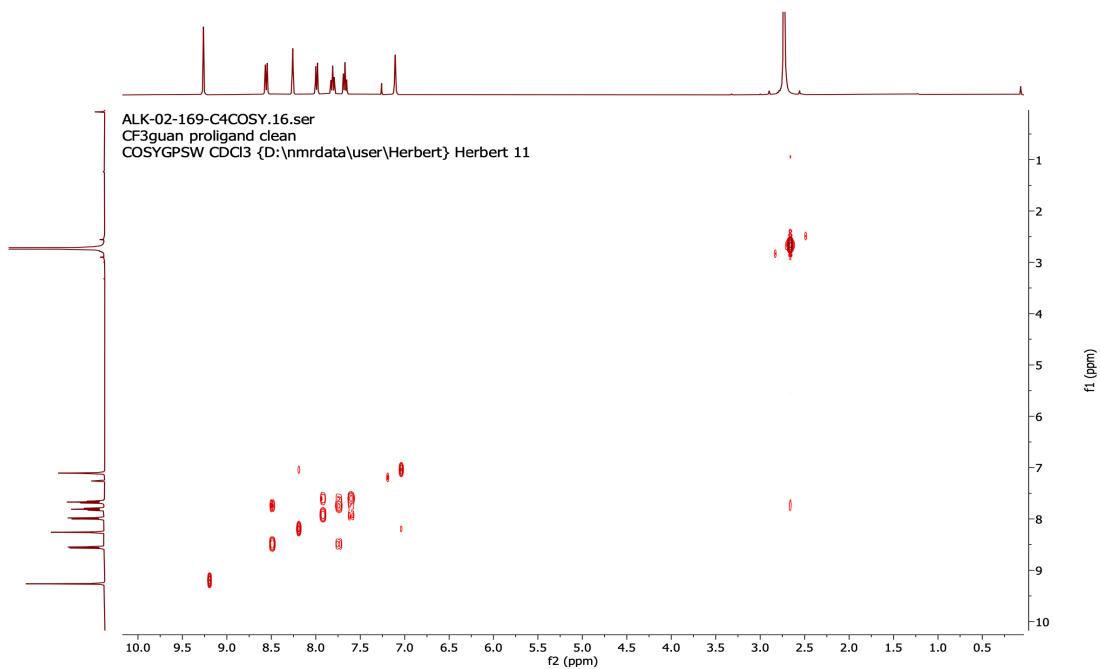

**Figure S33.**  $^1\text{H}$ - $^1\text{H}$  COSY NMR (400 MHz,  $\text{CDCl}_3$ , 22 °C) of (4-tetramethylguanidino)(2-trifluoromethyl)phenanthridine ( $\text{CF}_3\text{L1}$ ).

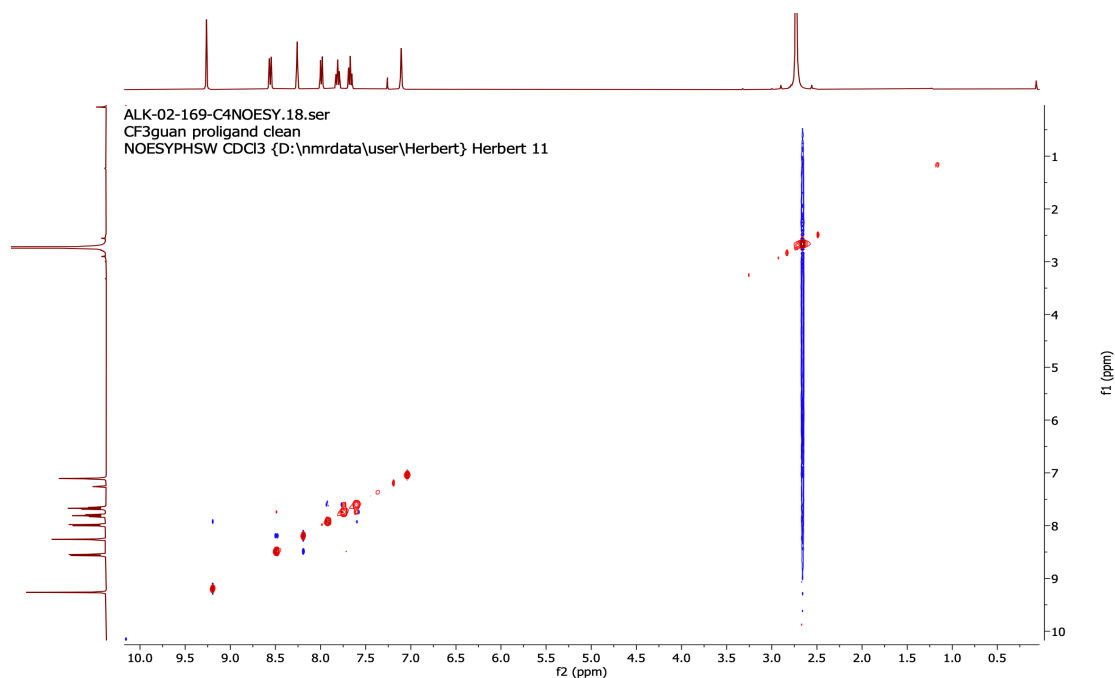

**Figure S34.**  $^1\text{H}$ - $^1\text{H}$  NOESY NMR (400 MHz,  $\text{CDCl}_3$ , 22  $^\circ\text{C}$ ) of (4-tetramethylguanidino)(2-trifluoromethyl)phenanthridine ( $\text{CF}_3\text{L1}$ ).

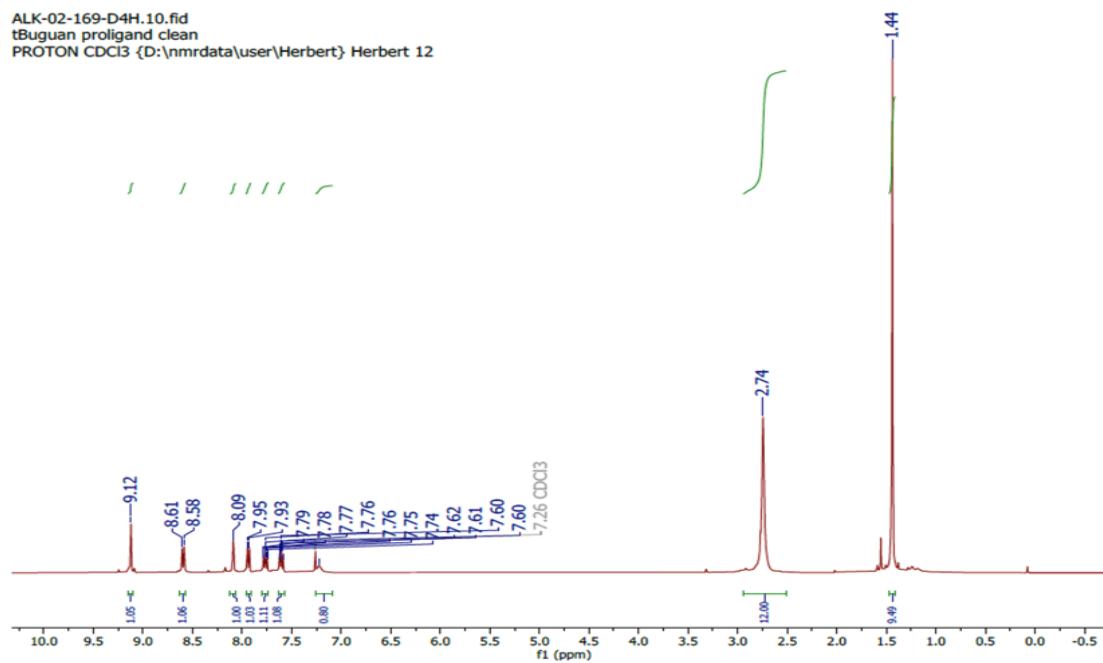

**Figure S35.**  $^1\text{H}$  NMR (400 MHz,  $\text{CDCl}_3$ , 22  $^\circ\text{C}$ ) of (2-tert-butyl)(4-tetramethylguanidino)phenanthridine ( $t\text{BuL1}$ ).

ALK-02-169-D4C.12.fid  
tBuguan prolignand clean  
C13CPD CDCl3 {D:\nmrdata\user\Herbert} Herbert 12

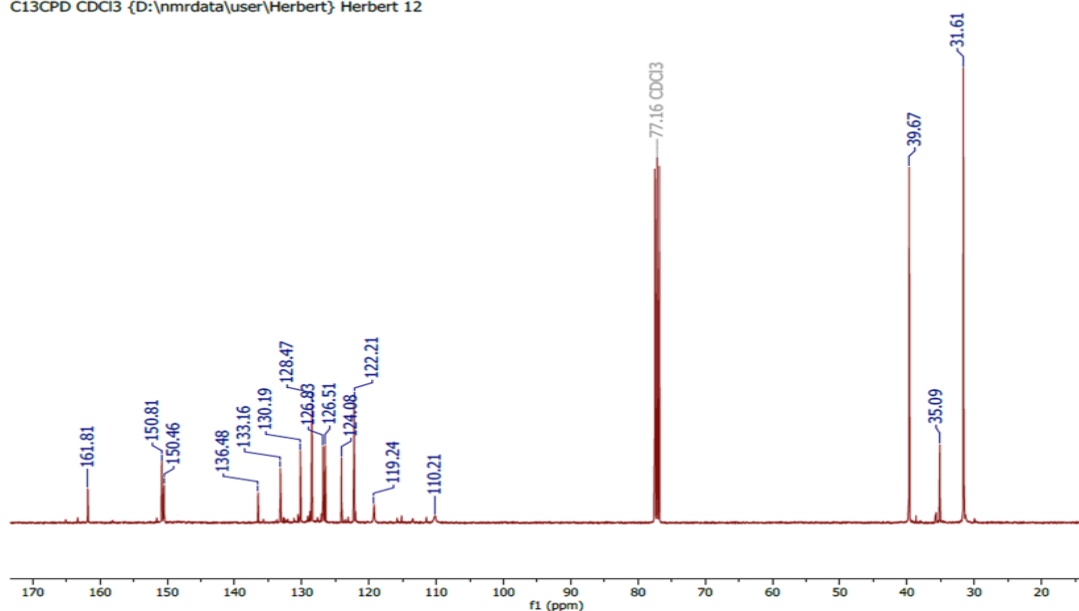

**Figure S36.** <sup>13</sup>C NMR (101 MHz, CDCl<sub>3</sub>, 22 °C) of (2-tert-butyl)(4-tetramethylguanidino)phenanthridine (**tBuL1**).

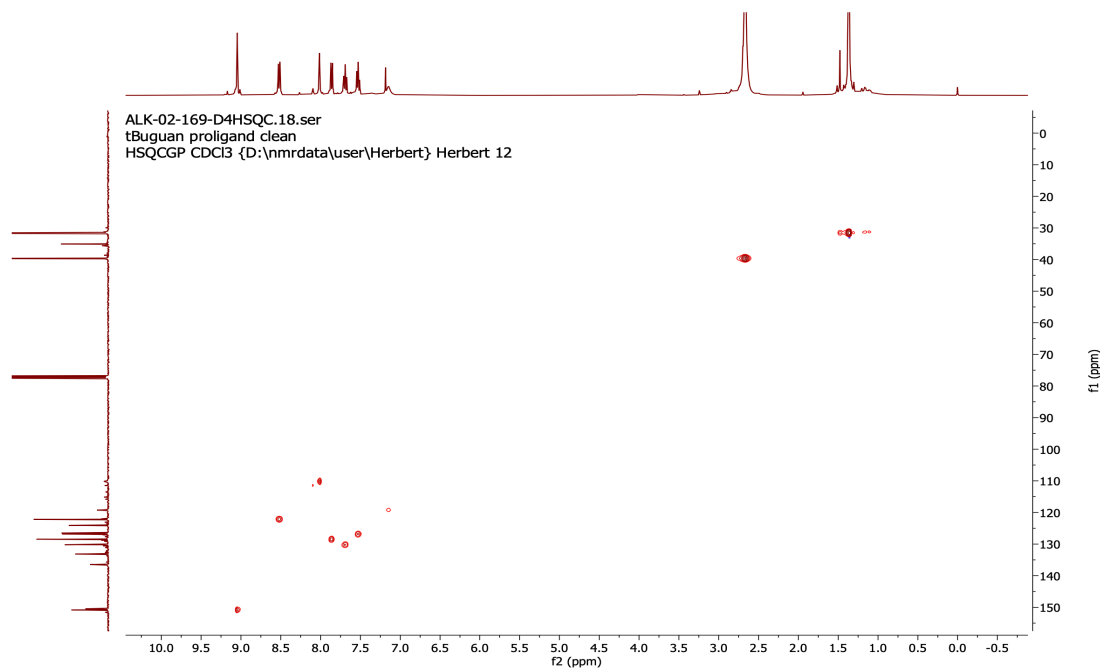

**Figure S37.** <sup>1</sup>H-<sup>13</sup>C HSQC NMR (101 MHz, CDCl<sub>3</sub>, 22 °C) of (2-tert-butyl)(4-tetramethylguanidino)phenanthridine (**tBuL1**).

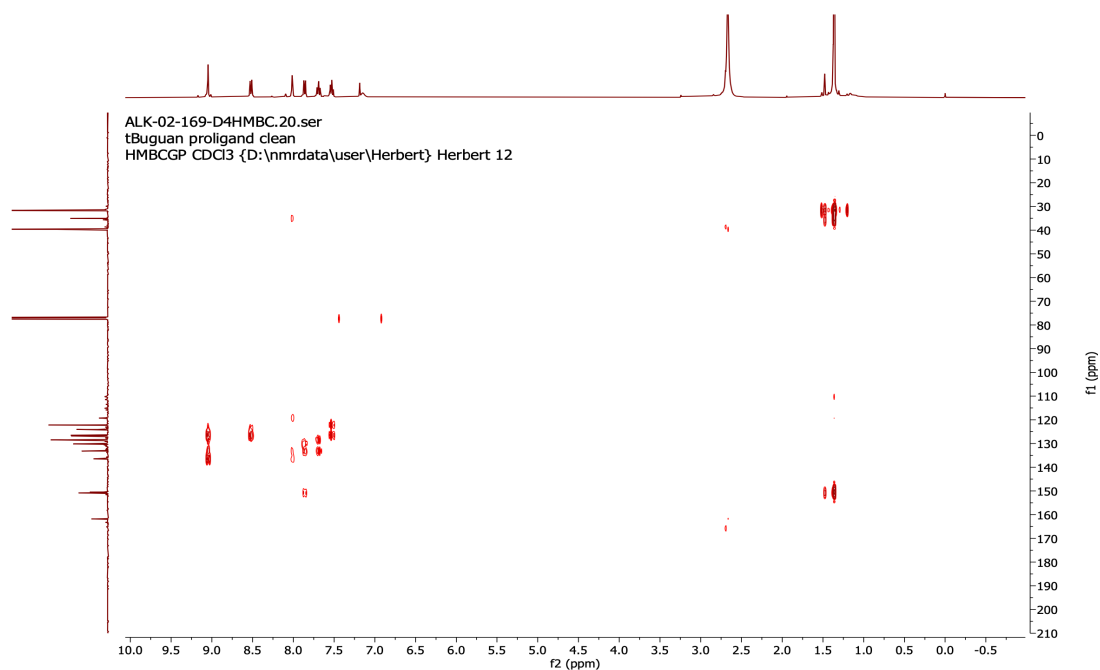

**Figure S38.**  $^1\text{H}$ - $^{13}\text{C}$  HMBC NMR (101 MHz,  $\text{CDCl}_3$ , 22 °C) of (2-tert-butyl)(4-tetramethylguanidino)phenanthridine ( $t\text{BuL1}$ ).

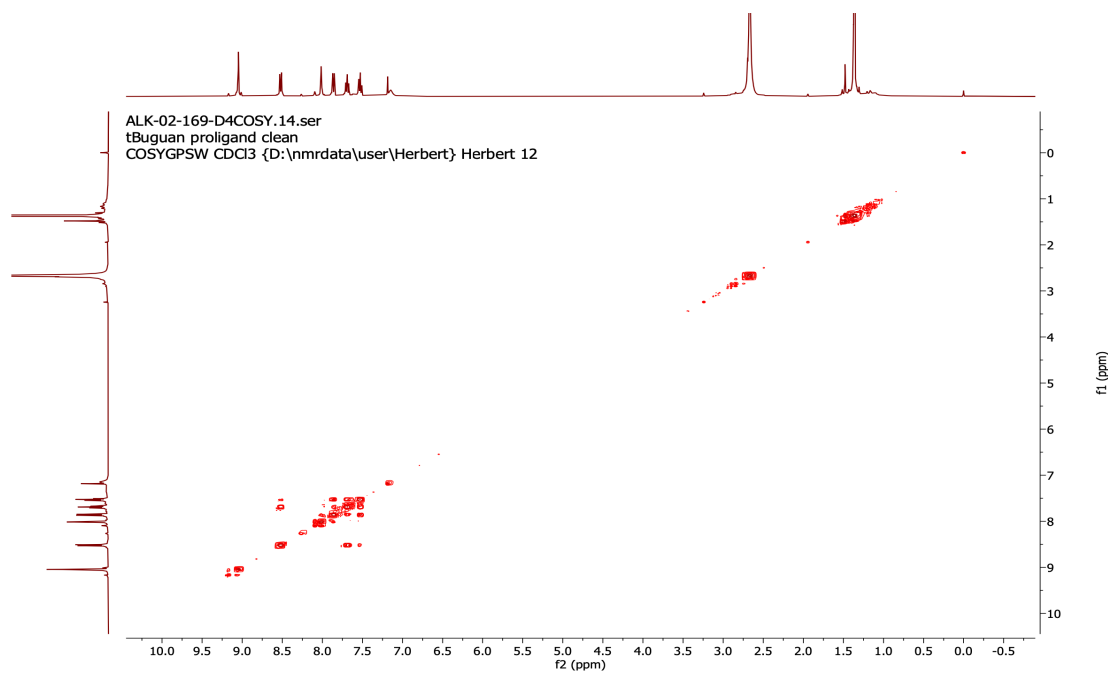

**Figure S39.**  $^1\text{H}$ - $^1\text{H}$  COSY NMR (400 MHz,  $\text{CDCl}_3$ , 22 °C) of (2-tert-butyl)(4-tetramethylguanidino)phenanthridine ( $t\text{BuL1}$ ).

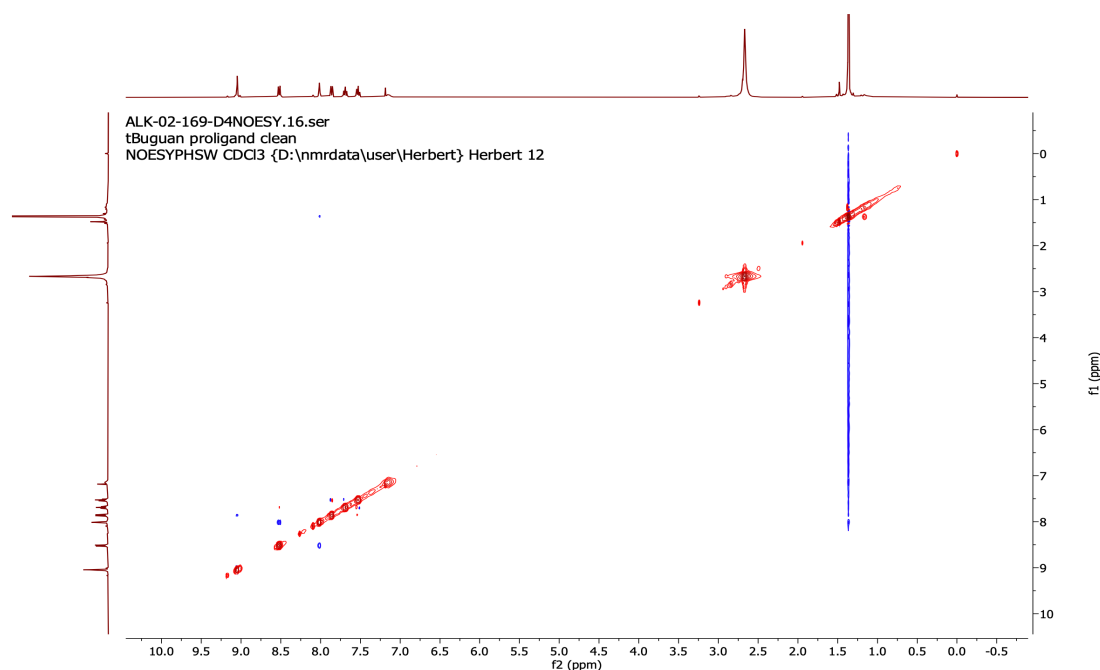

**Figure S40.**  $^1\text{H}$ - $^1\text{H}$  NOESY NMR (400 MHz,  $\text{CDCl}_3$ , 22 °C) of (2-tert-butyl)(4-tetramethylguanidino)phenanthridine ( $t\text{BuL1}$ ).

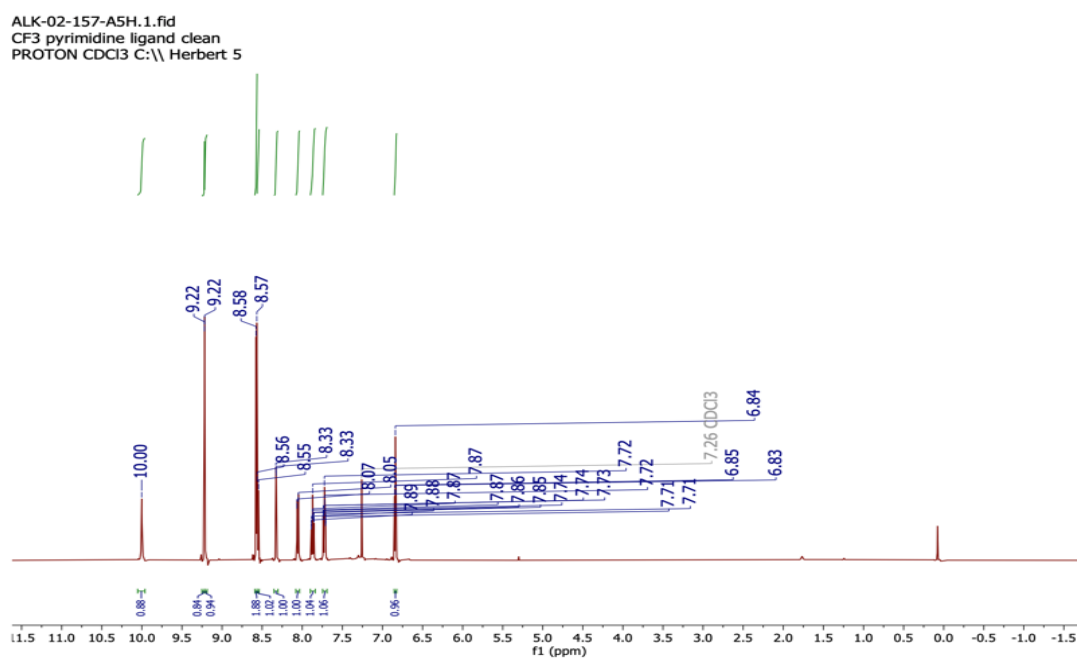

**Figure S41.**  $^1\text{H}$  NMR (500 MHz,  $\text{CDCl}_3$ , 22 °C) of (4-aminopyrimidino)(2-trifluoromethyl)phenanthridine ( $\text{CF}_3\text{L2}$ ).

ALK-02-157-A5F.1.fid  
CF3 pyrimidine ligand clean  
F19 CDCl3 C:\\\ Herbert 5

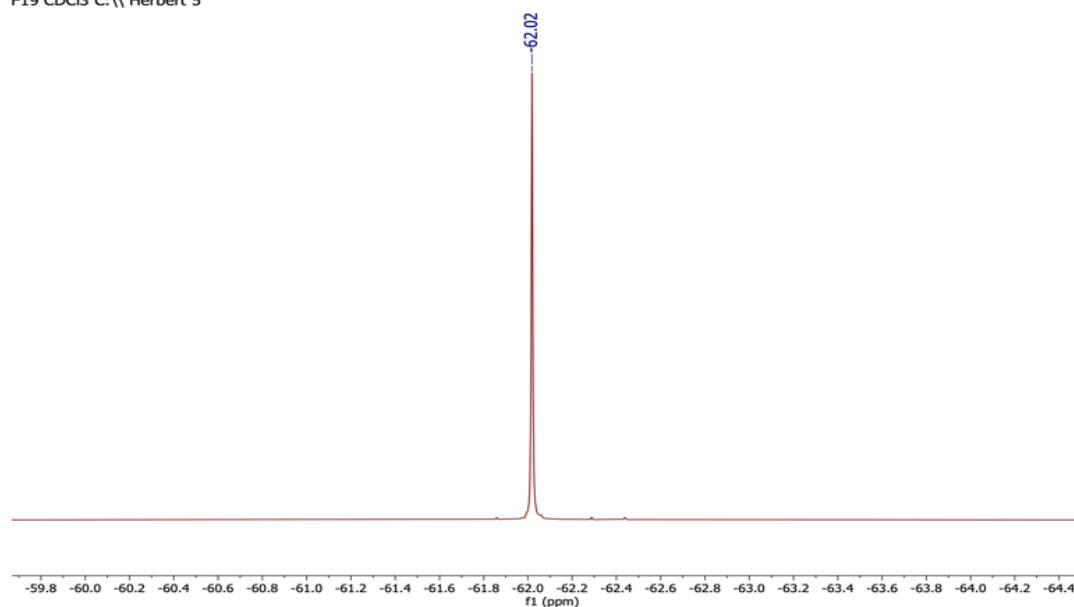

**Figure S42.**  $^{19}\text{F}\{^1\text{H}\}$  NMR (471 MHz,  $\text{CDCl}_3$ , 22 °C) of (4-aminopyrimidino)(2-trifluoromethyl)phenanthridine ( $\text{CF}_3\text{L2}$ ).

ALK-02-157-A5C.1.fid  
CF3 pyrimidine ligand clean  
C13CPD CDCl3 C:\\\ Herbert 5

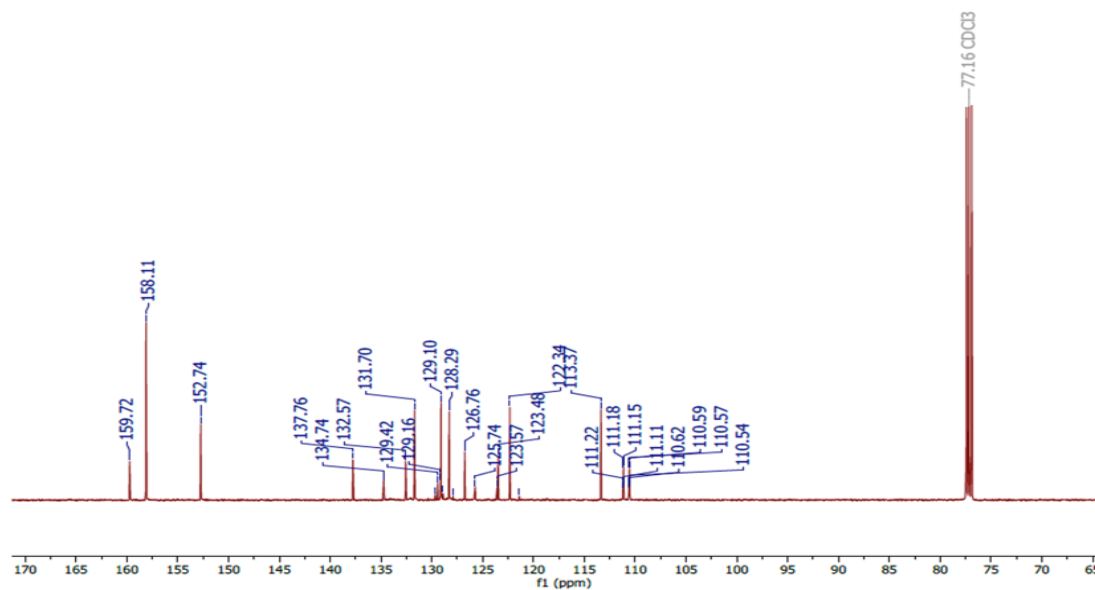

**Figure S43.**  $^{13}\text{C}$  NMR (126 MHz,  $\text{CDCl}_3$ , 22 °C) of (4-aminopyrimidino)(2-trifluoromethyl)phenanthridine ( $\text{CF}_3\text{L2}$ ).

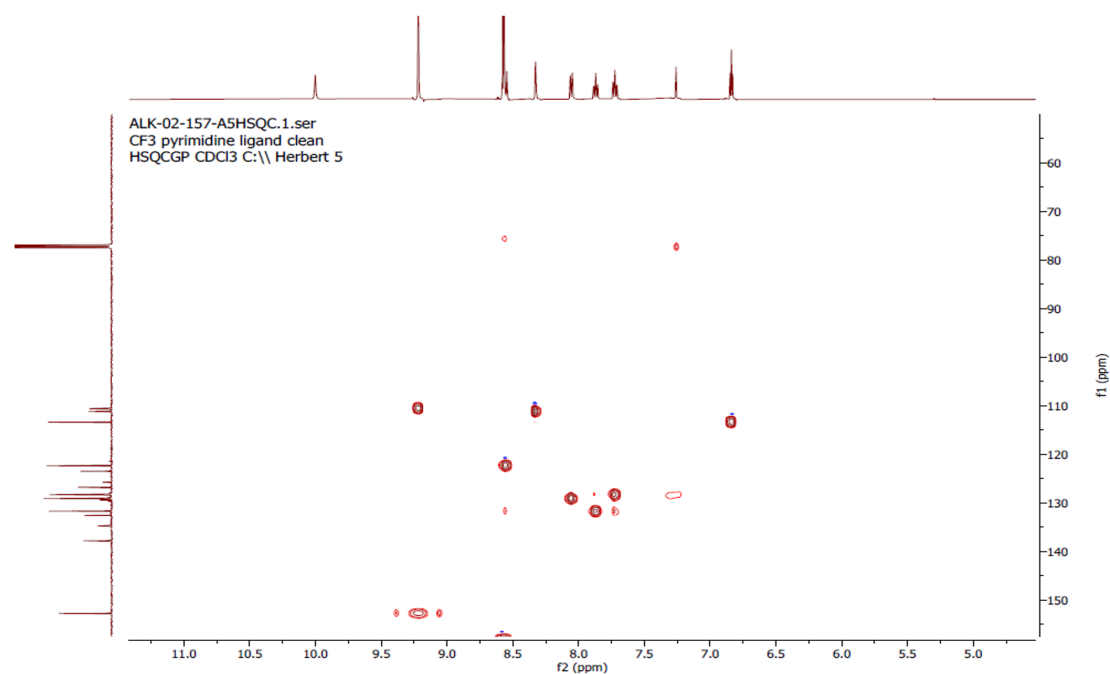

**Figure S44.**  $^1\text{H}$ - $^{13}\text{C}$  HSQC NMR (126 MHz,  $\text{CDCl}_3$ , 22  $^\circ\text{C}$ ) of (4-aminopyrimidino)(2-trifluoromethyl)phenanthridine ( $\text{CF}_3\text{L2}$ ).

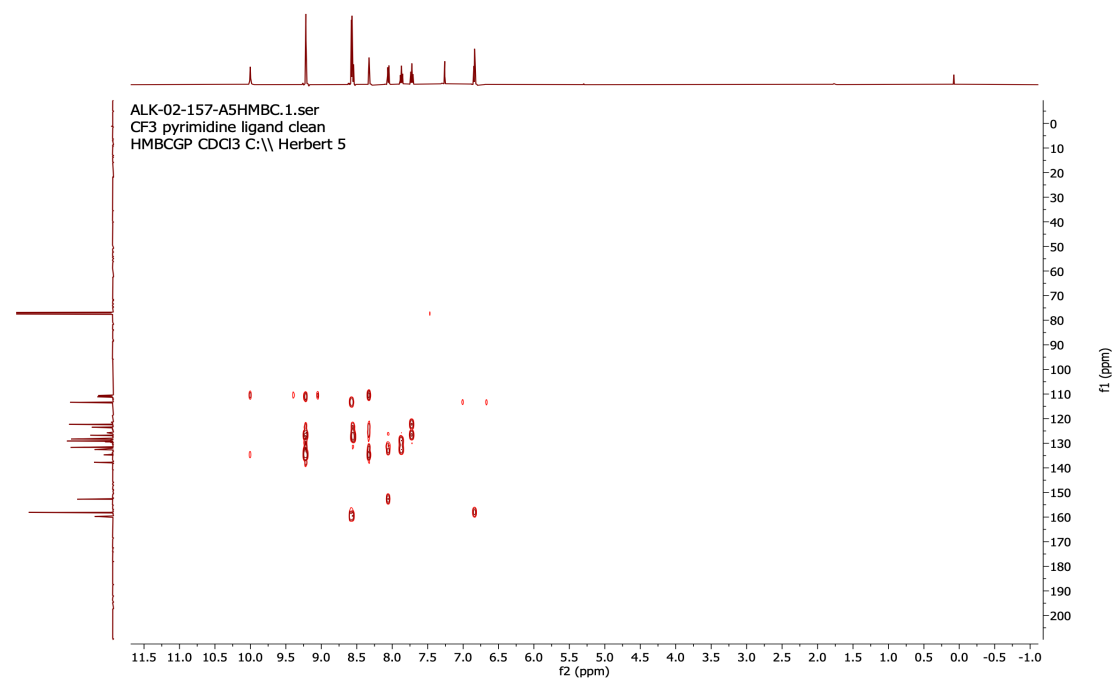

**Figure S45.**  $^1\text{H}$ - $^{13}\text{C}$  HMBC NMR (126 MHz,  $\text{CDCl}_3$ , 22  $^\circ\text{C}$ ) of (4-aminopyrimidino)(2-trifluoromethyl)phenanthridine ( $\text{CF}_3\text{L2}$ ).

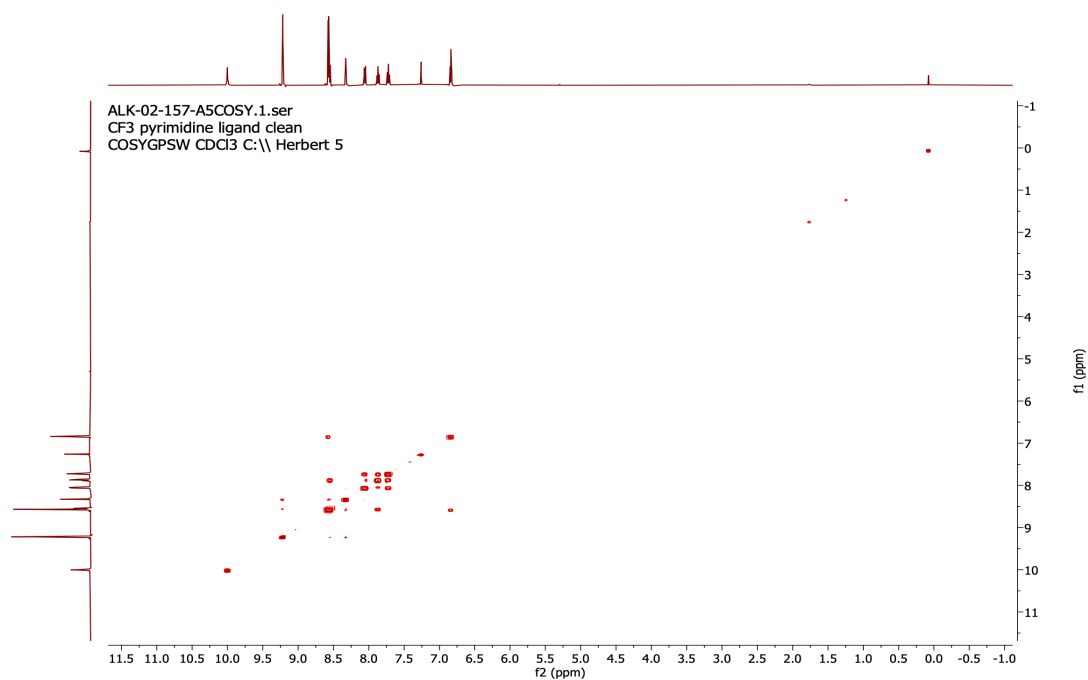

**Figure S46.**  $^1\text{H}$ - $^1\text{H}$  COSY NMR (500 MHz,  $\text{CDCl}_3$ , 22 °C) of (4-aminopyrimidino)(2-trifluoromethyl)phenanthridine ( $\text{CF}_3\text{L2}$ ).

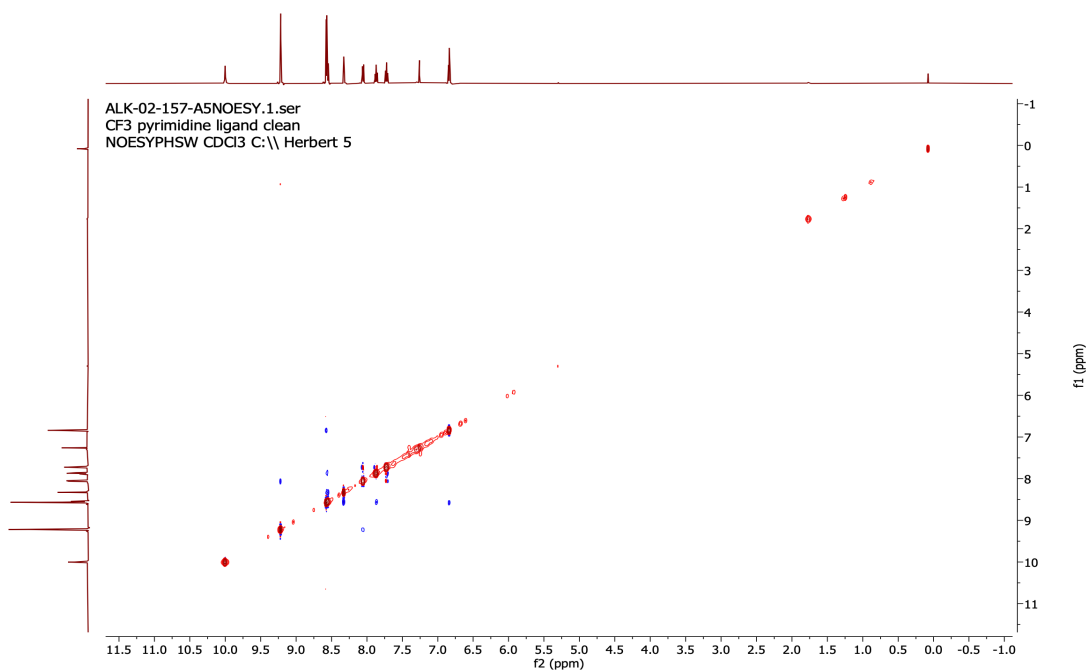

**Figure S47.**  $^1\text{H}$ - $^1\text{H}$  NOESY NMR (500 MHz,  $\text{CDCl}_3$ , 22 °C) of (4-aminopyrimidino)(2-trifluoromethyl)phenanthridine ( $\text{CF}_3\text{L2}$ ).

ALK-03-030-14H.10.fid  
 Zn(CF<sub>3</sub>guan)Cl<sub>2</sub>  
 PROTON CDCl<sub>3</sub> {D:\nmrdata\user\Herbert} Herbert 13

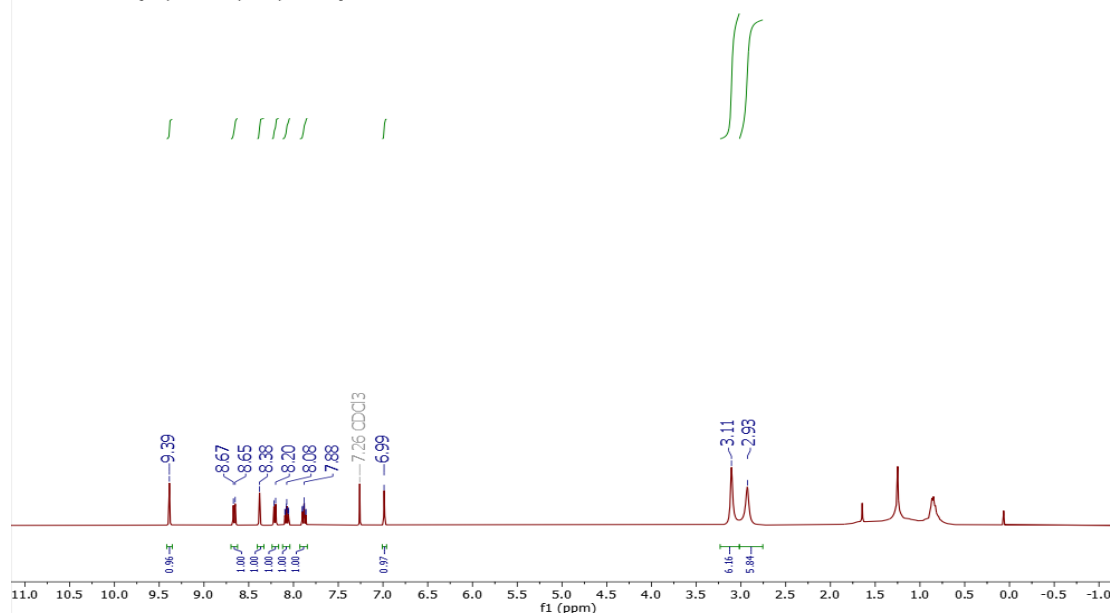

**Figure S48.** <sup>1</sup>H NMR (400 MHz, CDCl<sub>3</sub>, 22 °C) of (4-tetramethylguanidino)(2-trifluoromethyl)phenanthridine zinc chloride ((<sup>CF</sup><sub>3</sub>L1)ZnCl<sub>2</sub>).

ALK-03-030-14F.12.fid  
 Zn(CF<sub>3</sub>guan)Cl<sub>2</sub>  
 F19 CDCl<sub>3</sub> {D:\nmrdata\user\Herbert} Herbert 13

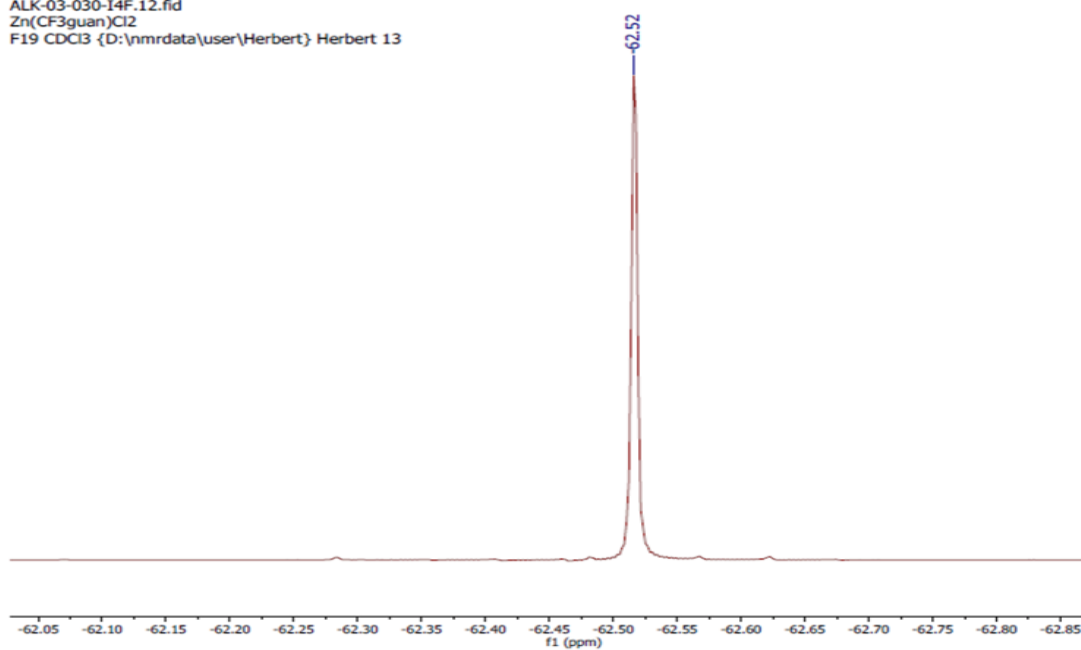

**Figure S49.** <sup>19</sup>F{<sup>1</sup>H} NMR (377 MHz, CDCl<sub>3</sub>, 22 °C) of (4-tetramethylguanidino)(2-trifluoromethyl)phenanthridine zinc chloride ((<sup>CF</sup><sub>3</sub>L1)ZnCl<sub>2</sub>).

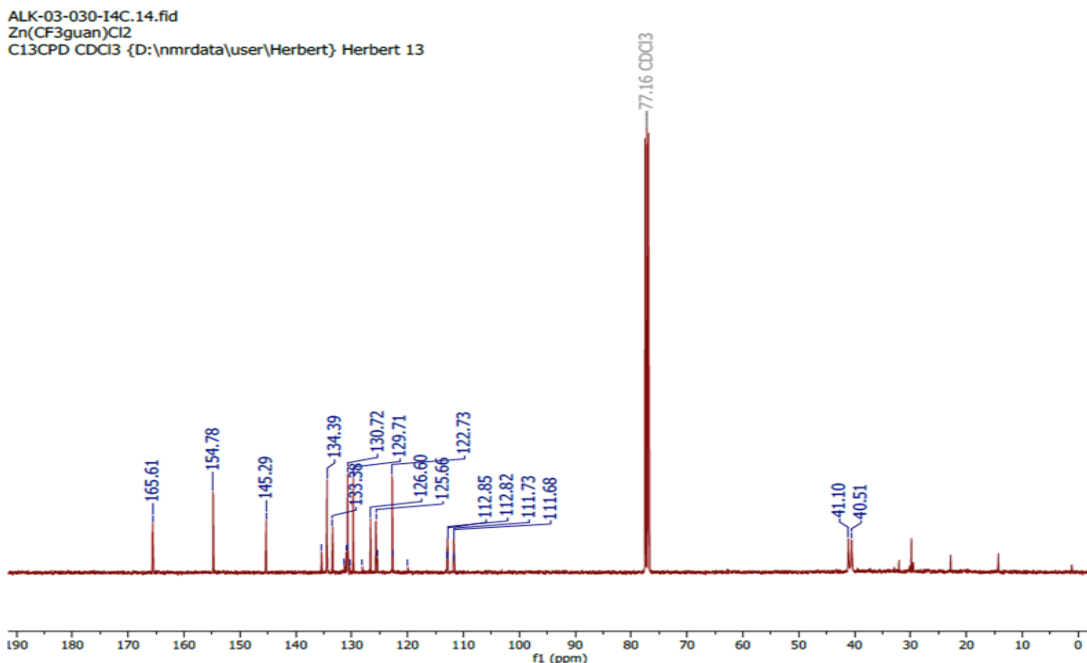

**Figure S50.** <sup>13</sup>C NMR (101 MHz, CDCl<sub>3</sub>, 22 °C) of (4-tetramethylguanidino)(2-trifluoromethyl)phenanthridine zinc chloride ((<sup>CF</sup><sub>3</sub>**L1**)ZnCl<sub>2</sub>).

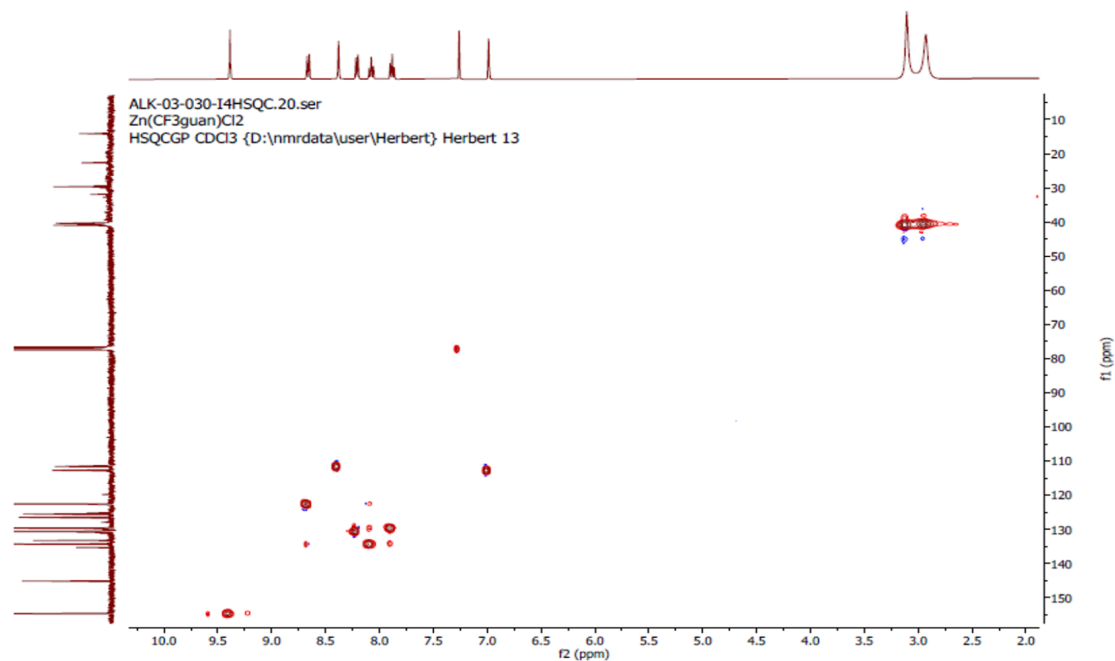

**Figure S51.** <sup>1</sup>H-<sup>13</sup>C HSQC NMR (101 MHz, CDCl<sub>3</sub>, 22 °C) of (4-tetramethylguanidino)(2-trifluoromethyl)phenanthridine zinc chloride ((<sup>CF</sup><sub>3</sub>**L1**)ZnCl<sub>2</sub>).

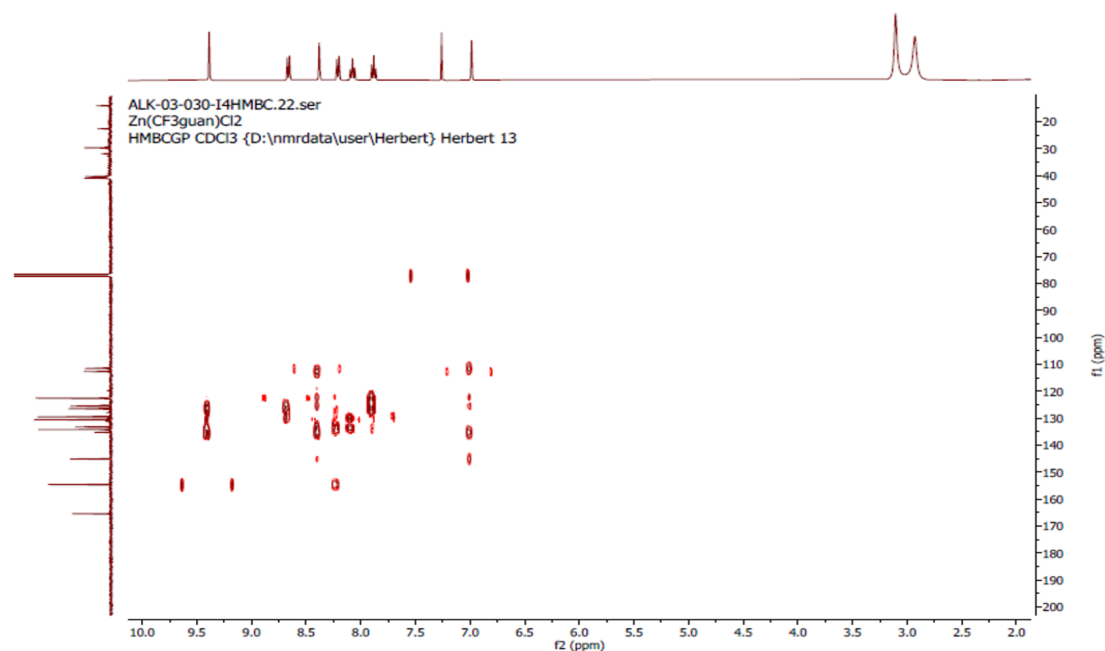

**Figure S52.**  $^1\text{H}$ - $^{13}\text{C}$  HMBC NMR (101 MHz,  $\text{CDCl}_3$ , 22 °C) of (4-tetramethylguanidino)(2-trifluoromethyl)phenanthridine zinc chloride ( $(\text{CF}_3\text{L1})\text{ZnCl}_2$ ).

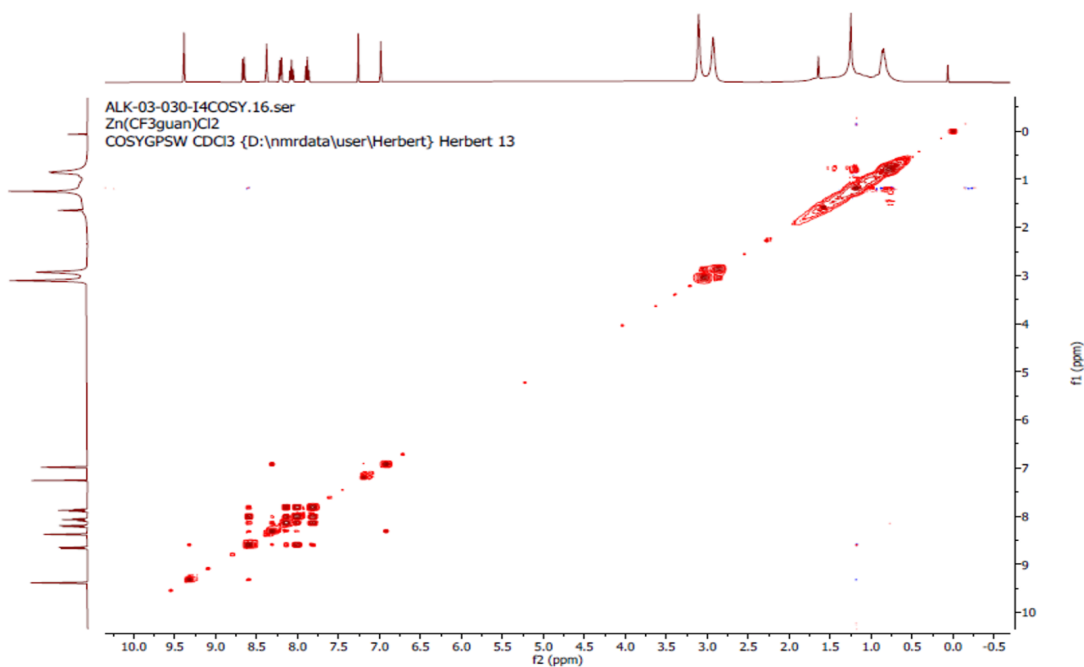

**Figure S53.**  $^1\text{H}$ - $^1\text{H}$  COSY NMR (400 MHz,  $\text{CDCl}_3$ , 22 °C) of (4-tetramethylguanidino)(2-trifluoromethyl)phenanthridine zinc chloride ( $(\text{CF}_3\text{L1})\text{ZnCl}_2$ ).

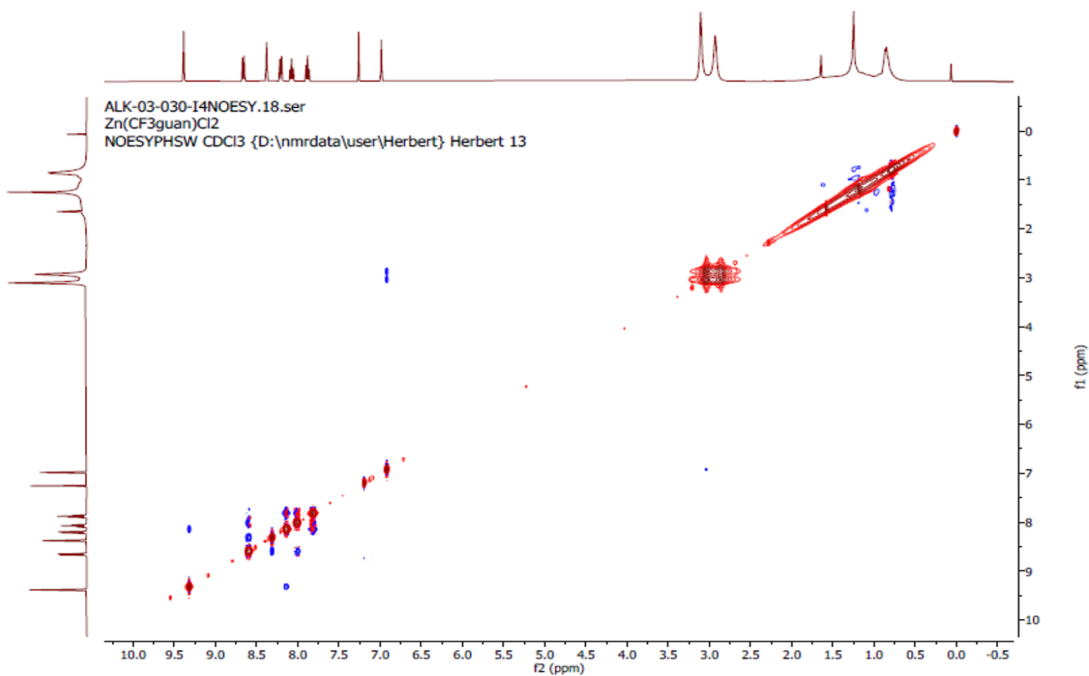

**Figure S54.** <sup>1</sup>H-<sup>1</sup>H NOESY NMR (400 MHz, CDCl<sub>3</sub>, 22 °C) of (4-tetramethylguanidino)(2-trifluoromethyl)phenanthridine zinc chloride ((<sup>CF</sup><sub>3</sub>**L1**)ZnCl<sub>2</sub>).

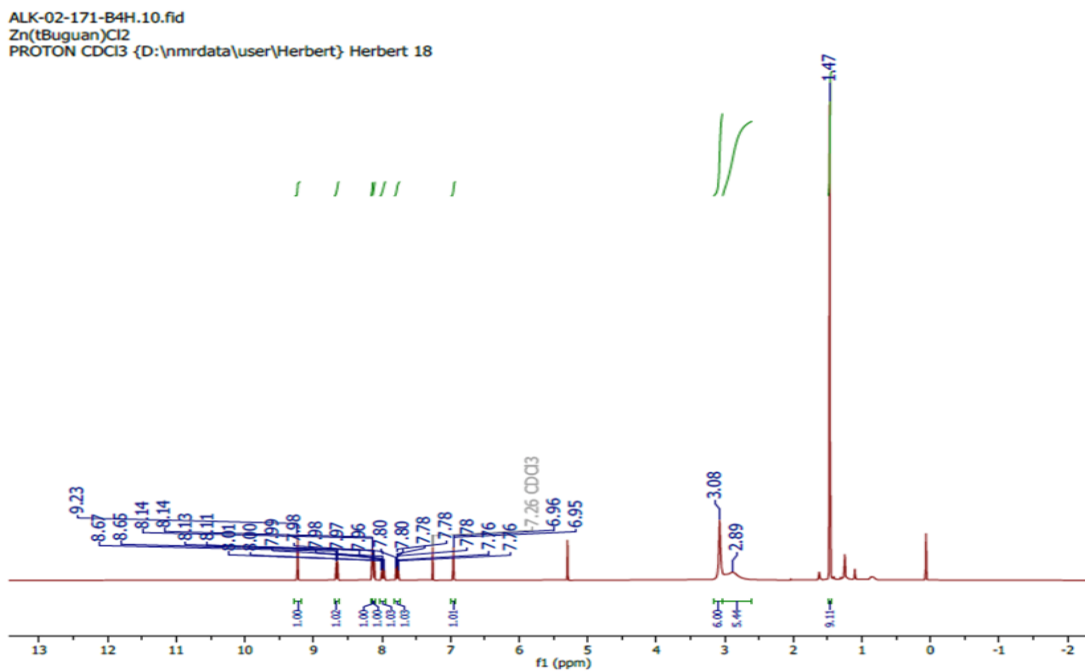

**Figure S55.** <sup>1</sup>H NMR (400 MHz, CDCl<sub>3</sub>, 22 °C) of (2-tert-butyl)(4-tetramethylguanidino)phenanthridine zinc chloride ((<sup>tBu</sup>**L1**)ZnCl<sub>2</sub>).

ALK-02-171-B4C.12.fid  
 Zn(tBuguan)Cl2  
 C13CPD CDCl3 {D:\nmrdata\user\Herbert} Herbert 18

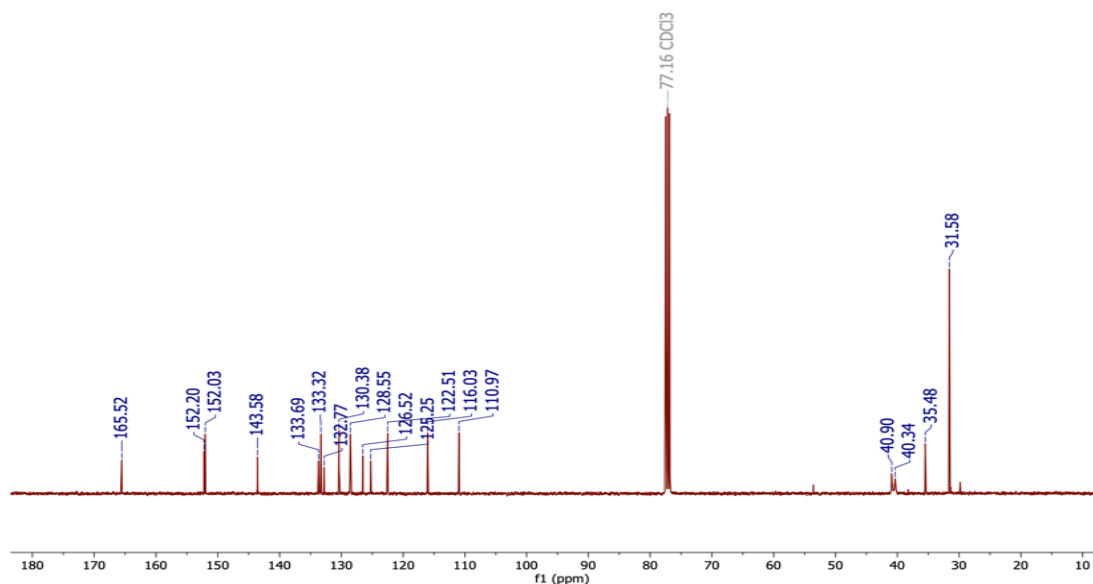

**Figure S56.** <sup>13</sup>C NMR (101 MHz, CDCl<sub>3</sub>, 22 °C) of (2-tert-butyl)(4-tetramethylguanidino)phenanthridine zinc chloride ((<sup>t</sup>BuL1)ZnCl<sub>2</sub>).

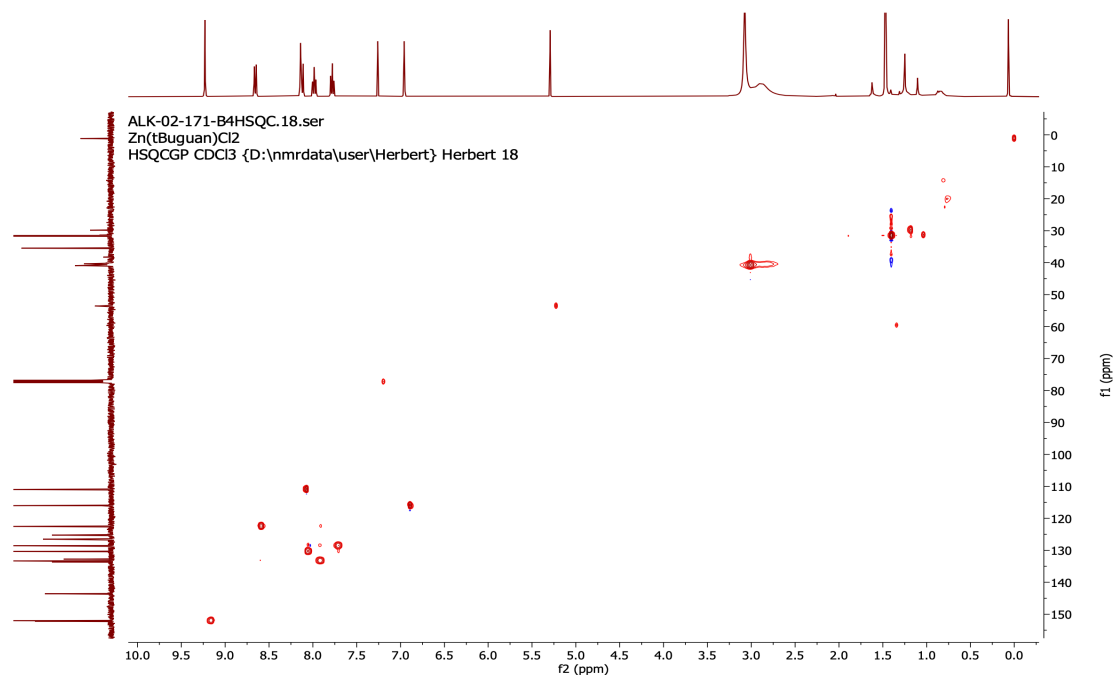

**Figure S57.** <sup>1</sup>H-<sup>13</sup>C HSQC NMR (101 MHz, CDCl<sub>3</sub>, 22 °C) of (2-tert-butyl)(4-tetramethylguanidino)phenanthridine zinc chloride ((<sup>t</sup>BuL1)ZnCl<sub>2</sub>).

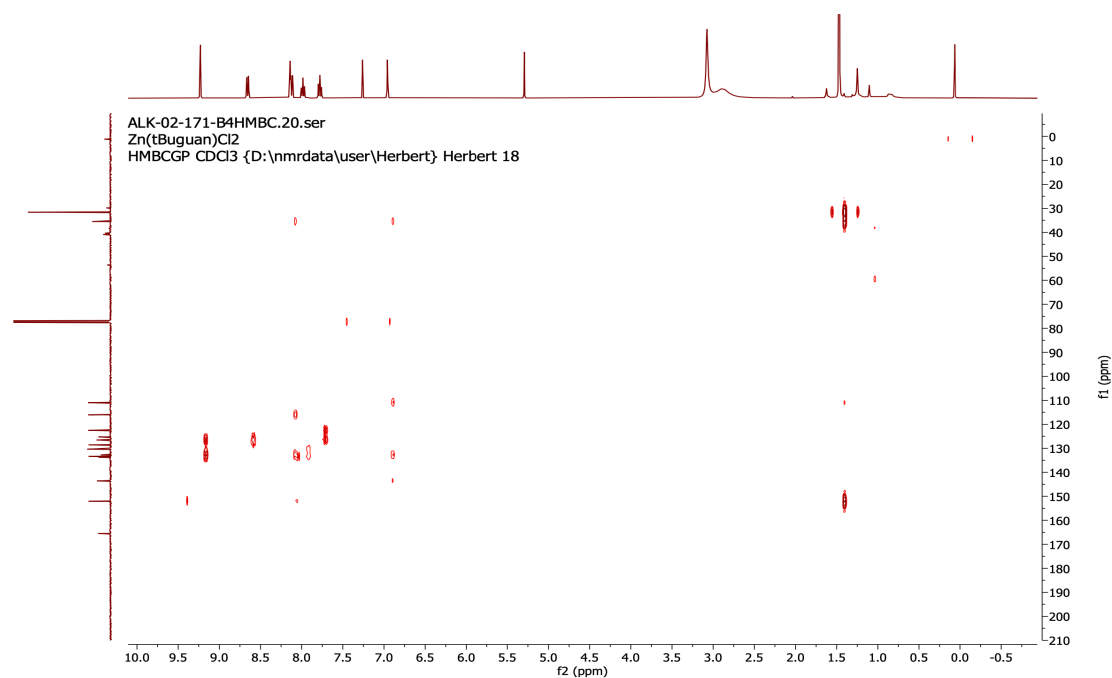

**Figure S58.**  $^1\text{H}$ - $^{13}\text{C}$  HMBC NMR (101 MHz,  $\text{CDCl}_3$ , 22 °C) of (2-tert-butyl)(4-tetramethylguanidino)phenanthridine zinc chloride ( $(^t\text{BuL1})\text{ZnCl}_2$ ).

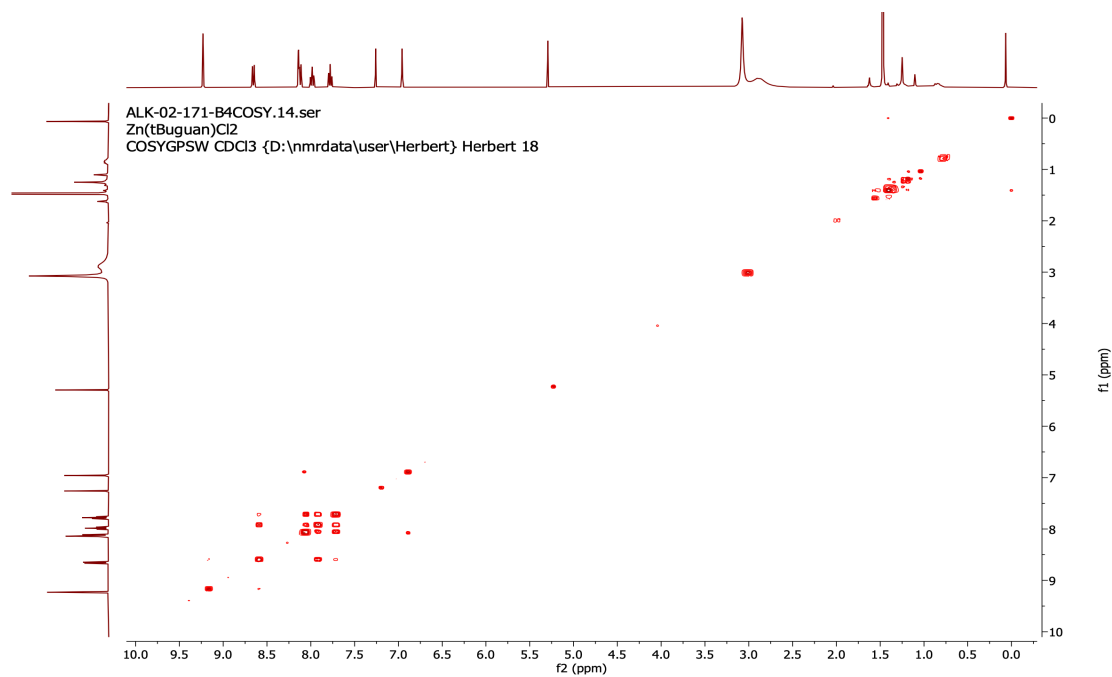

**Figure S59.**  $^1\text{H}$ - $^1\text{H}$  COSY NMR (400 MHz,  $\text{CDCl}_3$ , 22 °C) of (2-tert-butyl)(4-tetramethylguanidino)phenanthridine zinc chloride ( $(^t\text{BuL1})\text{ZnCl}_2$ ).

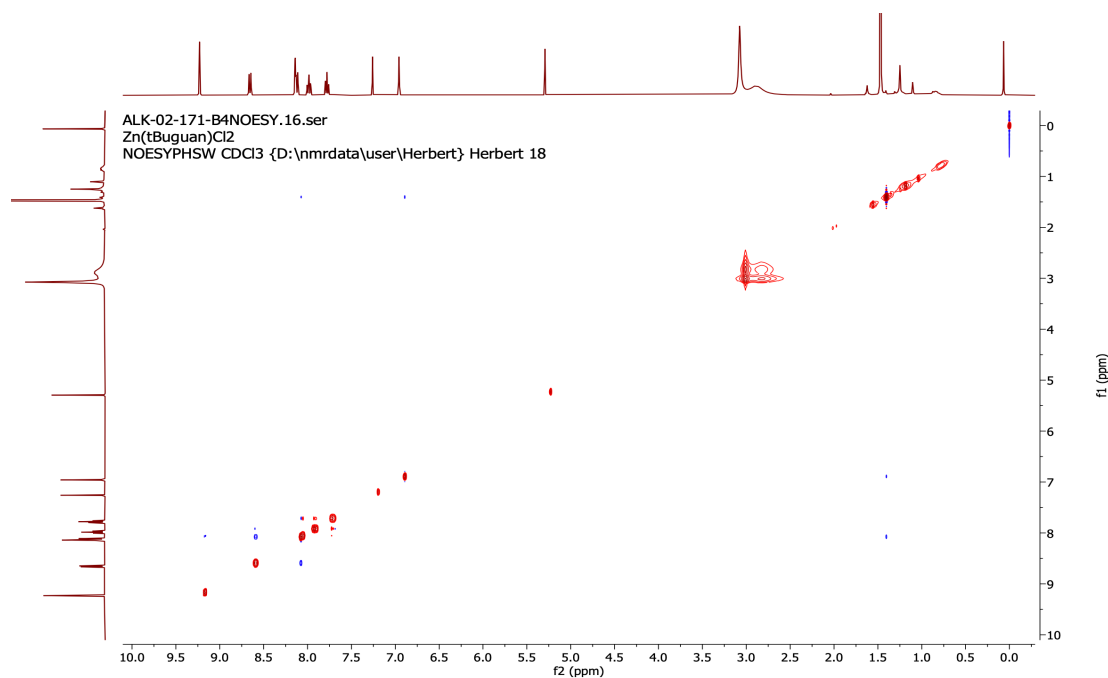

**Figure S60.**  $^1\text{H}$ - $^1\text{H}$  NOESY NMR (400 MHz,  $\text{CDCl}_3$ , 22 °C) of (2-tert-butyl)(4-tetramethylguanidino)phenanthridine zinc chloride ( $(^t\text{BuL1})\text{ZnCl}_2$ ).

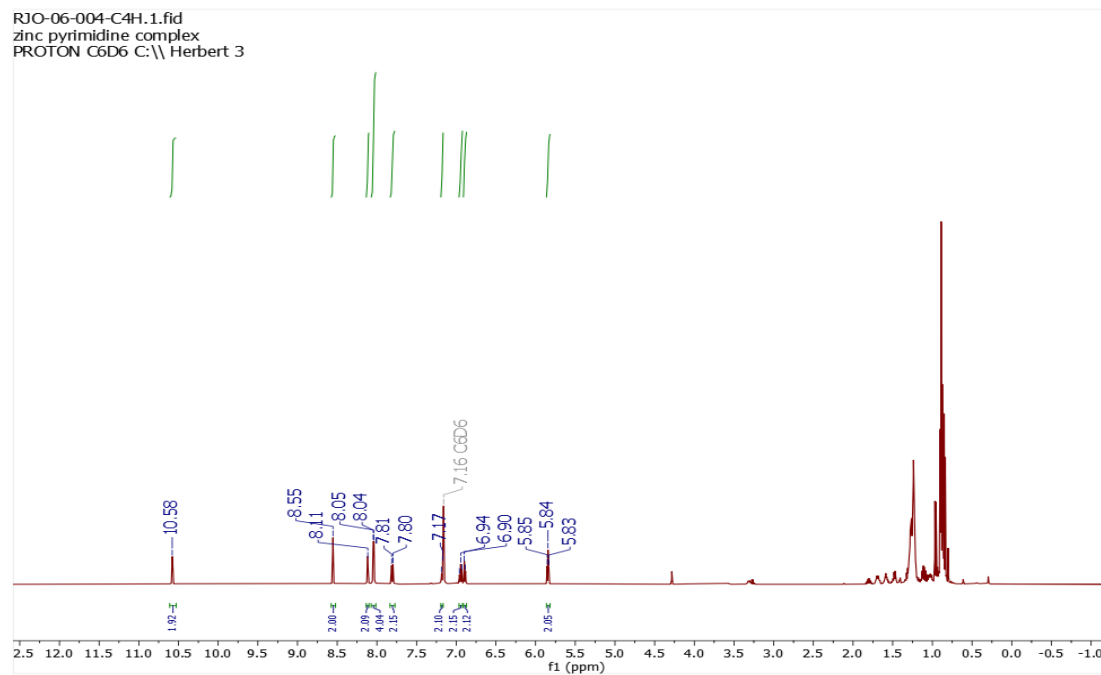

**Figure S61.**  $^1\text{H}$  NMR (400 MHz,  $\text{C}_6\text{D}_6$ , 22 °C) of bis-(4-aminopyrimidino)(2-trifluoromethyl)phenanthridine zinc ( $(^{\text{CF}_3}\text{L2})_2\text{Zn}$ ).

RJO-06-004-C4F.1.fid  
zinc pyrimidine complex  
F19 C6D6 C:\ Herbert 3

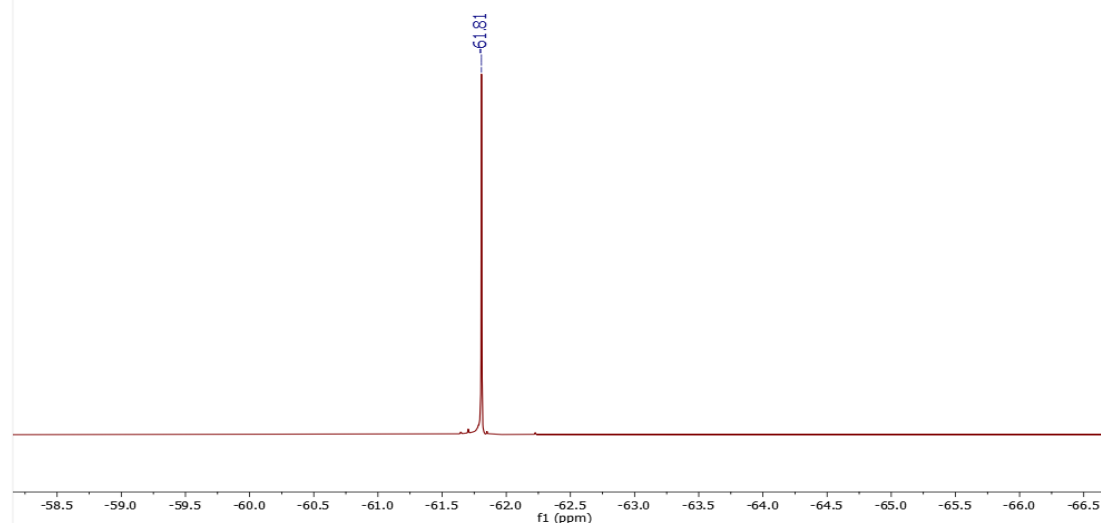

**Figure S62.**  $^{19}\text{F}\{^1\text{H}\}$  NMR (377 MHz,  $\text{C}_6\text{D}_6$ , 22 °C) of bis-(4-aminopyrimidino)(2-trifluoromethyl)phenanthridine zinc ( $(\text{CF}_3\text{L}_2)_2\text{Zn}$ ).

RJO-06-004-C4F.2.fid  
zinc pyrimidine complex  
C13CPD C6D6 C:\ Herbert 3

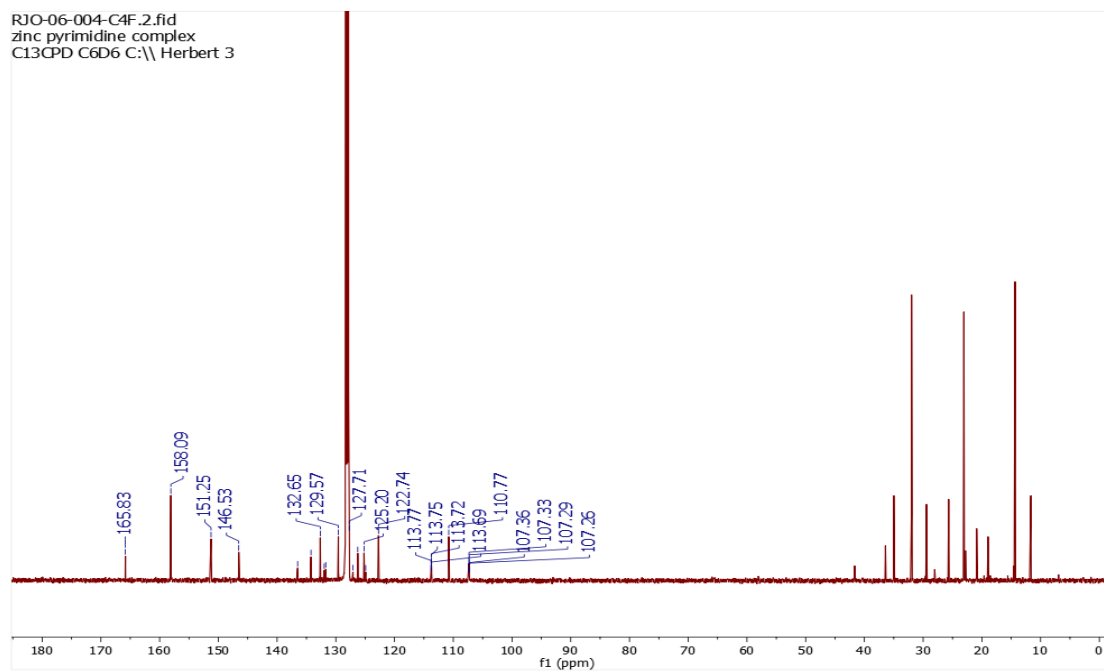

**Figure S63.**  $^{13}\text{C}$  NMR (101 MHz,  $\text{C}_6\text{D}_6$ , 22 °C) of bis-(4-aminopyrimidino)(2-trifluoromethyl)phenanthridine zinc ( $(\text{CF}_3\text{L}_2)_2\text{Zn}$ ).

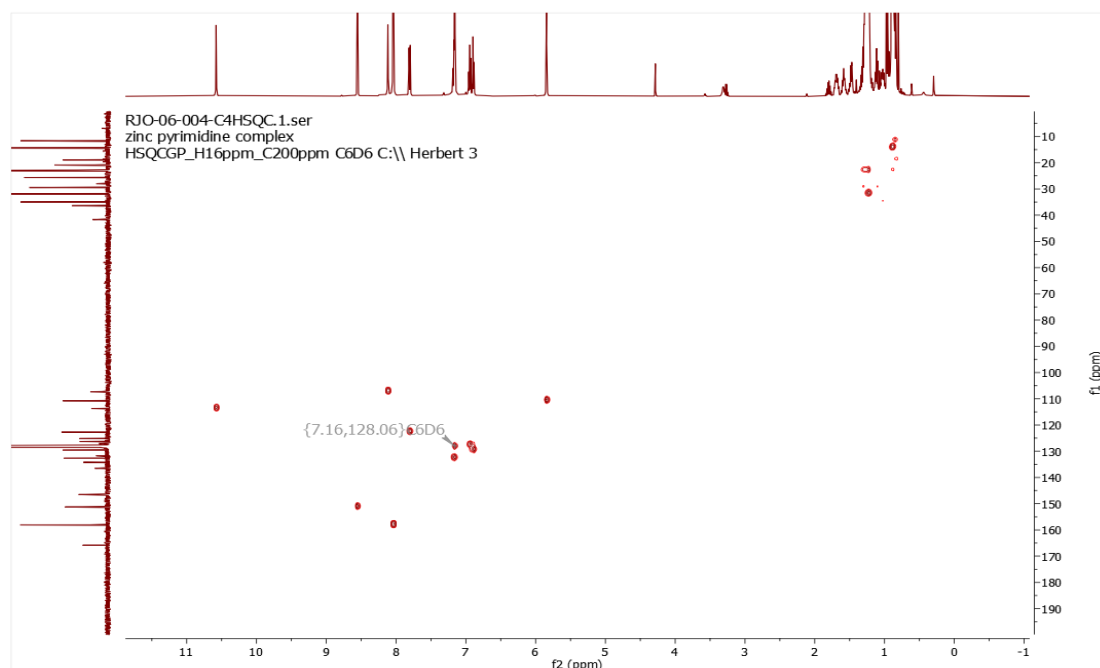

**Figure S64.**  $^1\text{H}$ - $^{13}\text{C}$  HSQC NMR (101 MHz,  $\text{CDCl}_3$ , 22  $^\circ\text{C}$ ) of bis-(4-aminopyrimidino)(2-trifluoromethyl)phenanthridine zinc ( $(\text{CF}_3\text{L}_2)_2\text{Zn}$ ).

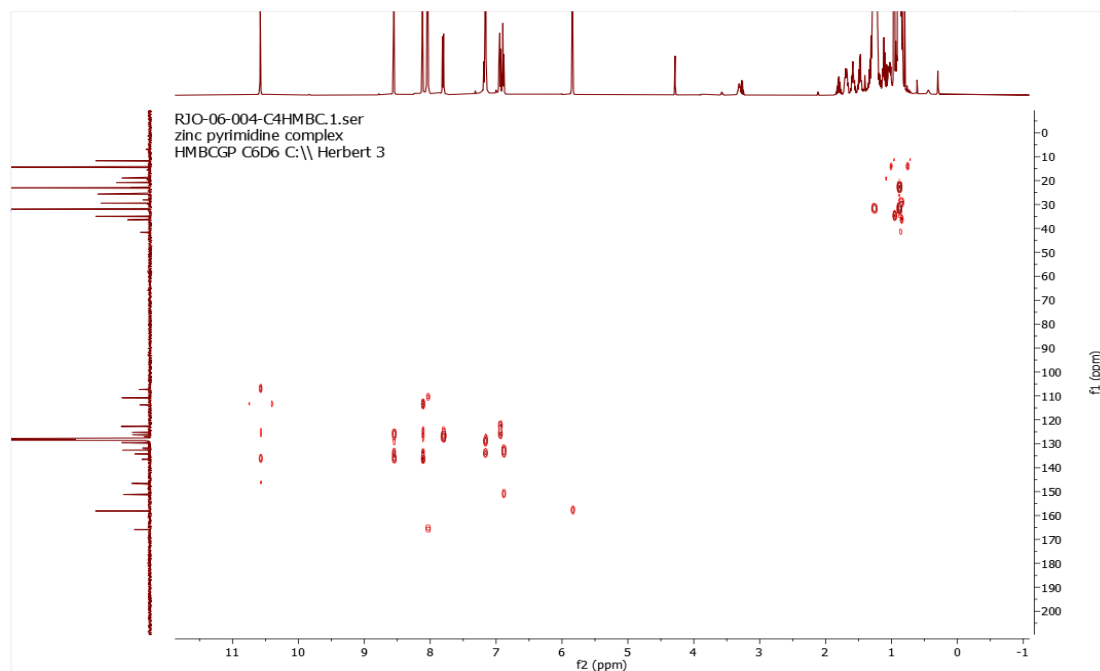

**Figure S65.**  $^1\text{H}$ - $^{13}\text{C}$  HMBC NMR (101 MHz,  $\text{CDCl}_3$ , 22  $^\circ\text{C}$ ) of bis-(4-aminopyrimidino)(2-trifluoromethyl)phenanthridine zinc ( $(\text{CF}_3\text{L}_2)_2\text{Zn}$ ).

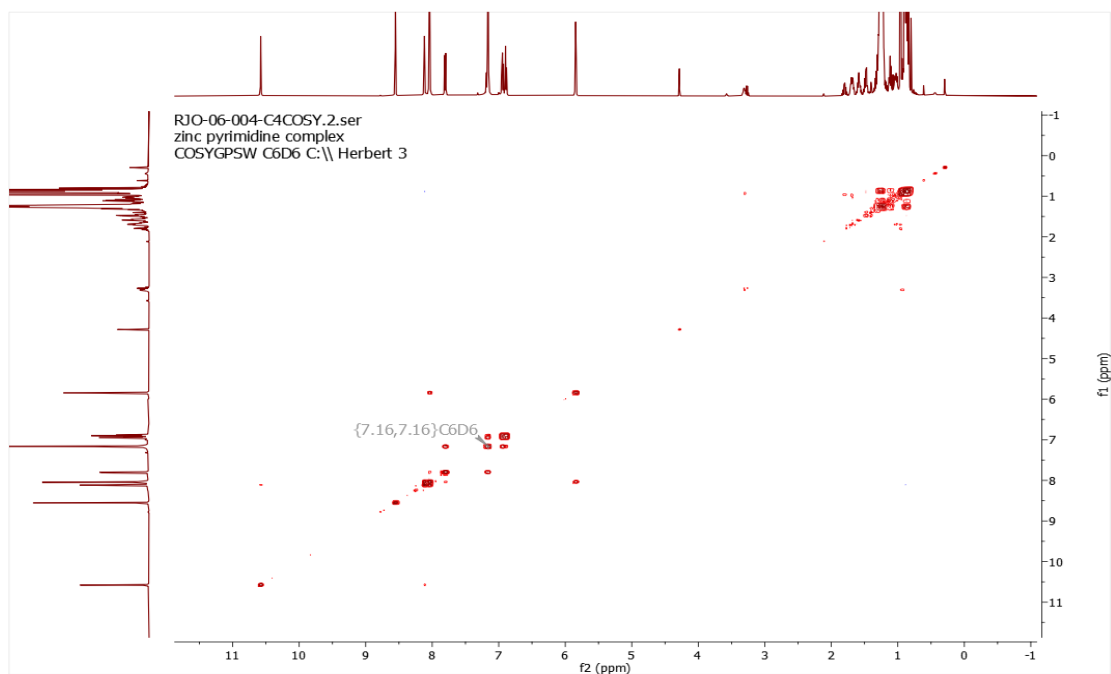

**Figure S66.**  $^1\text{H}$ - $^1\text{H}$  COSY NMR (400 MHz,  $\text{CDCl}_3$ , 22 °C) of bis-(4-aminopyrimidino)(2-trifluoromethyl)phenanthridine zinc ( $(\text{CF}_3\text{L}_2)_2\text{Zn}$ ).

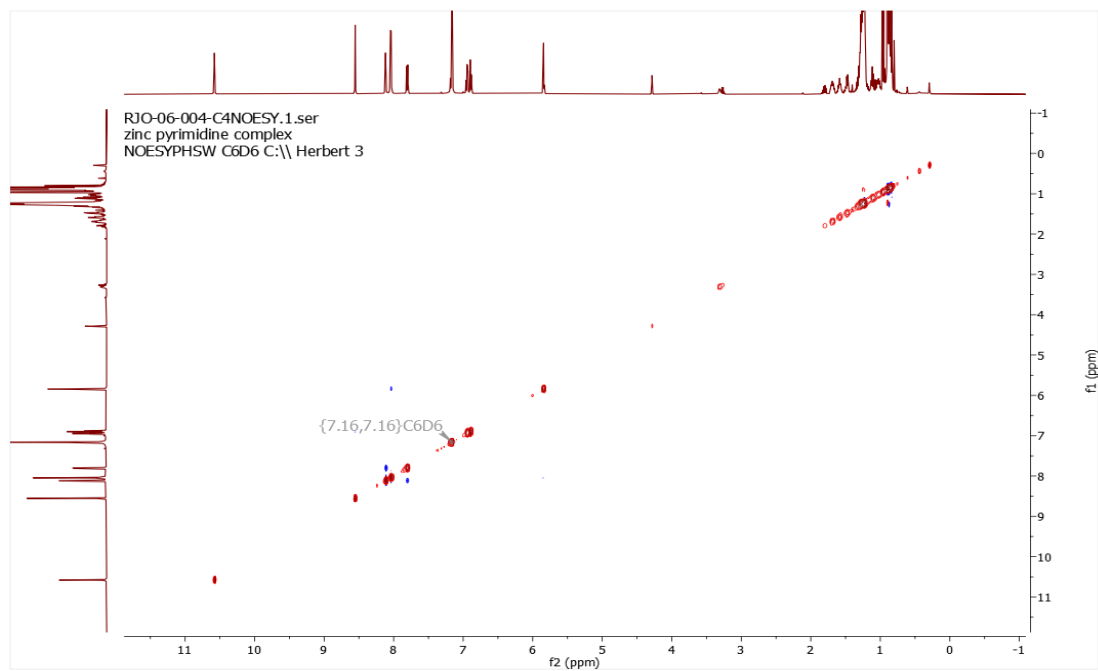

**Figure S67.**  $^1\text{H}$ - $^1\text{H}$  NOESY NMR (400 MHz,  $\text{CDCl}_3$ , 22 °C) of bis-(4-aminopyrimidino)(2-trifluoromethyl)phenanthridine zinc ( $(\text{CF}_3\text{L}_2)_2\text{Zn}$ ).

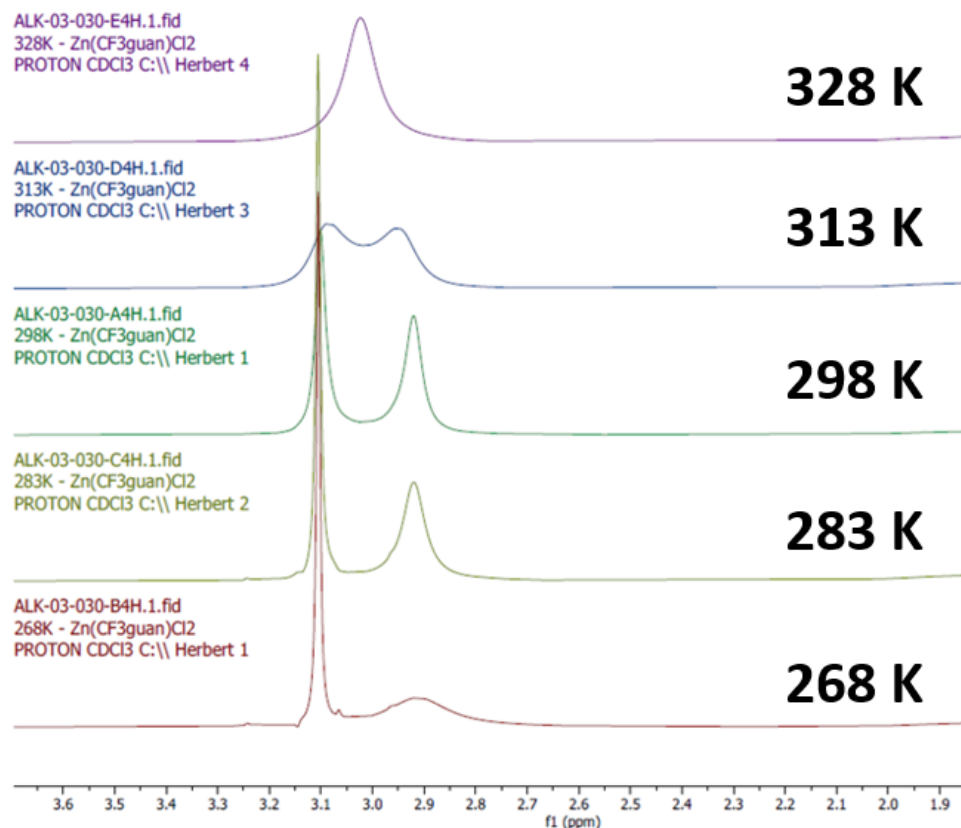

**Figure S68.** Variable-temperature <sup>1</sup>H NMR (500 MHz, CDCl<sub>3</sub>) of (4-tetramethylguanidino)(2-trifluoromethyl)phenanthridine zinc chloride (zoom of tetramethyl region) ((<sup>CF</sup><sub>3</sub>L2)<sub>2</sub>Zn).

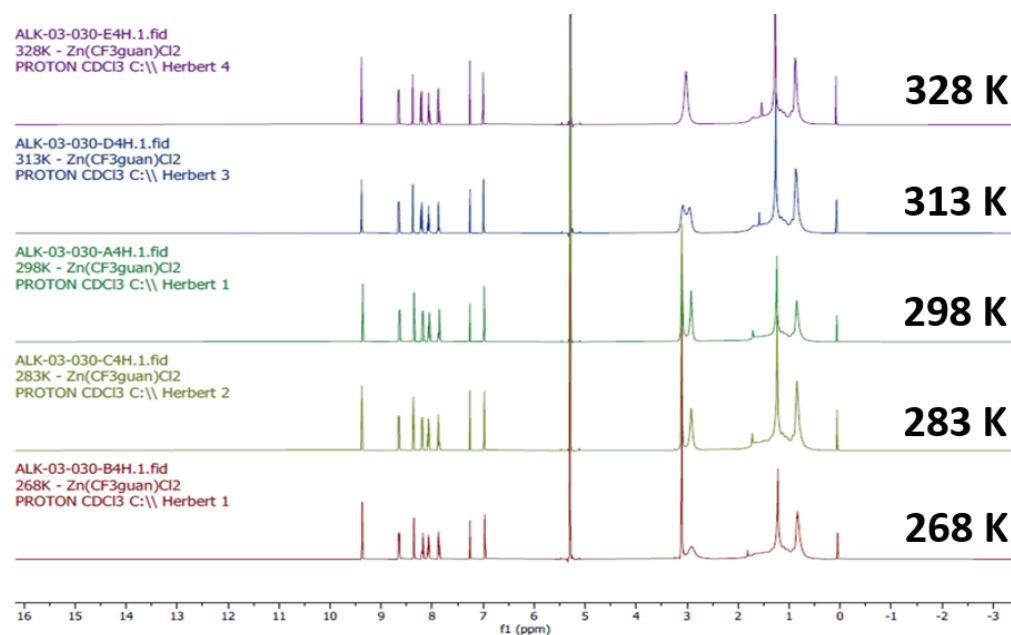

**Figure S69.** Variable-temperature <sup>1</sup>H NMR (500 MHz, CDCl<sub>3</sub>) of (4-tetramethylguanidino)(2-trifluoromethyl)phenanthridine zinc chloride (full spectra) ((<sup>CF</sup><sub>3</sub>L2)<sub>2</sub>Zn).

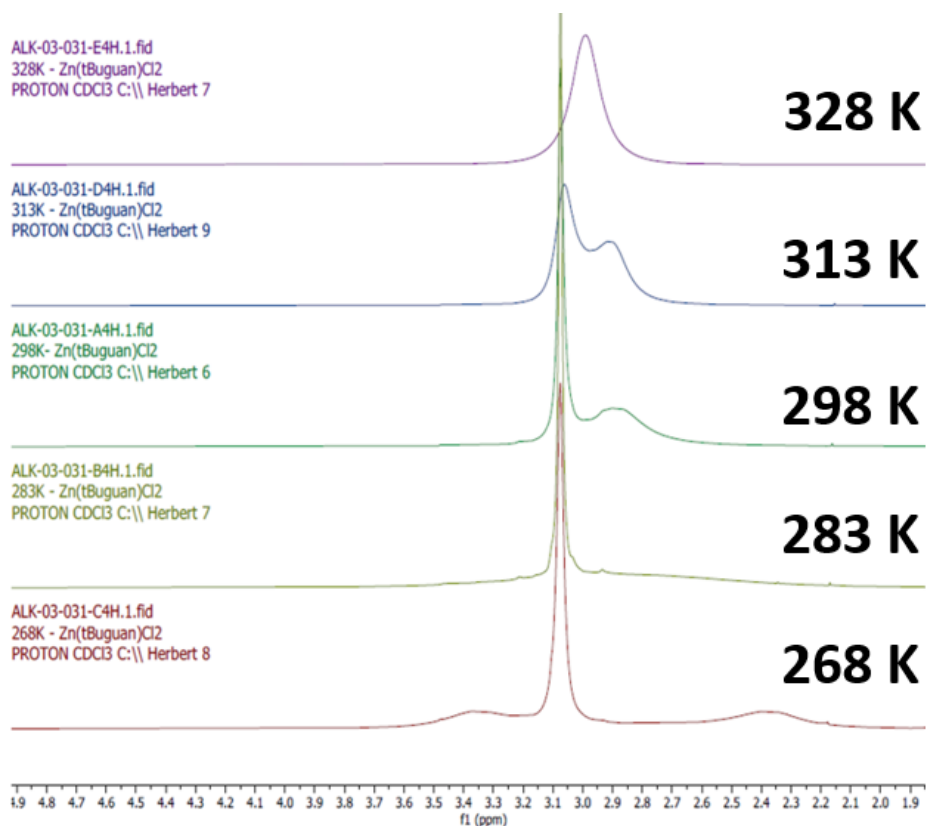

**Figure S70.** Variable-temperature  $^1\text{H}$  NMR (500 MHz,  $\text{CDCl}_3$ ) of (2-tert-butyl)(4-tetramethylguanidino)phenanthridine zinc chloride (zoom of tetramethyl region) ( $(^t\text{BuL1})\text{ZnCl}_2$ ).

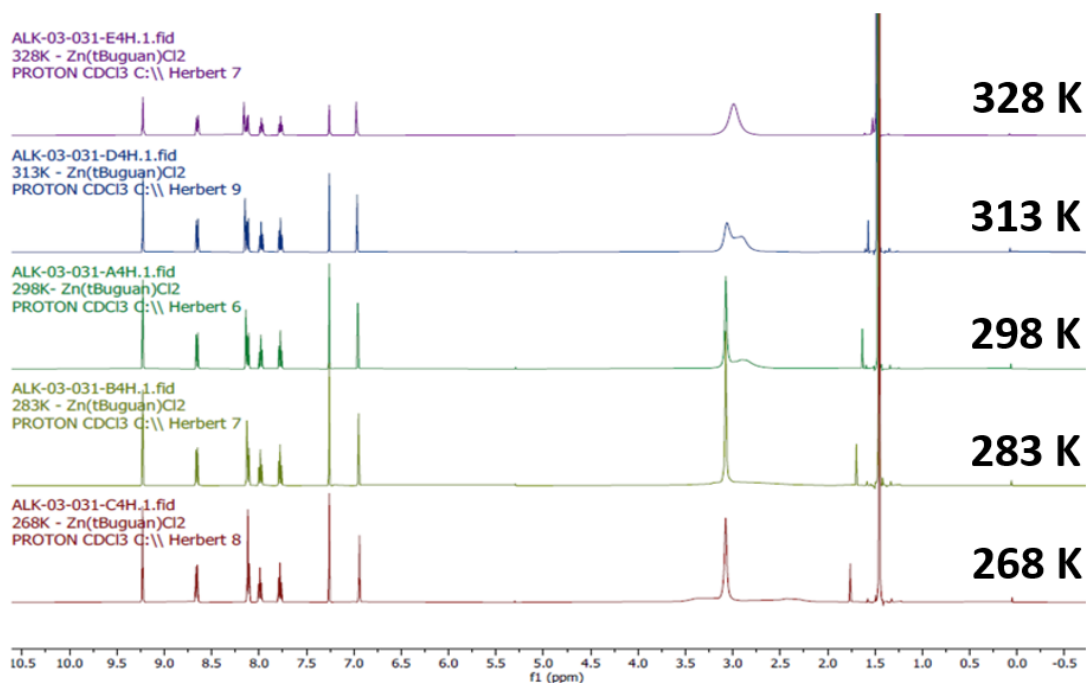

**Figure S71.** Variable-temperature  $^1\text{H}$  NMR (500 MHz,  $\text{CDCl}_3$ ) of (2-tert-butyl)(4-tetramethylguanidino)phenanthridine zinc chloride (full spectra) ( $(^t\text{BuL1})\text{ZnCl}_2$ ).

## HRMS figures

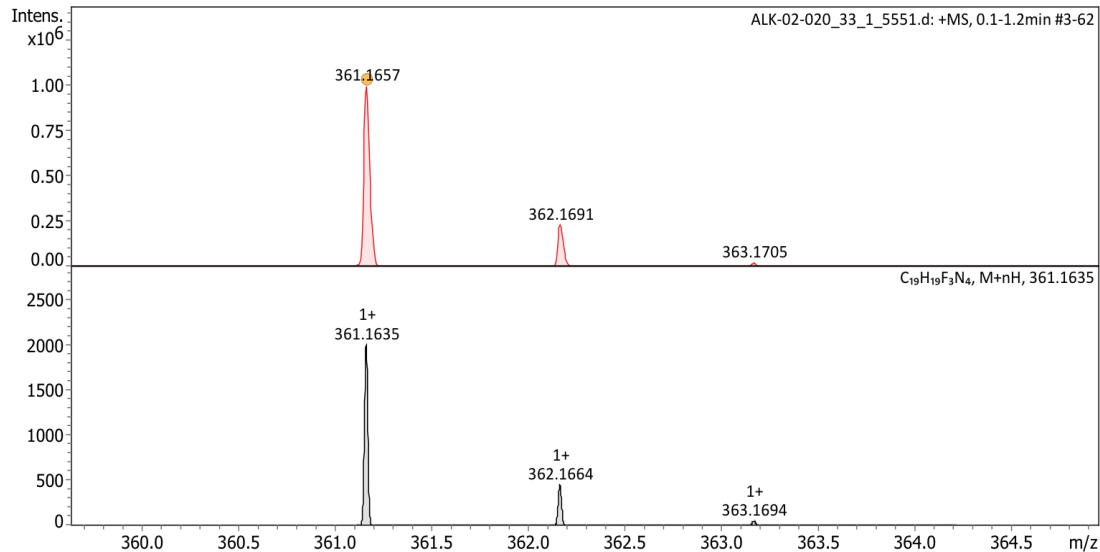

**Figure S72.** APCI high-resolution mass spectrum of (4-tetramethylguanidino)(2-trifluoromethyl)phenanthridine ( $\text{CF}_3\text{L1}$ ).

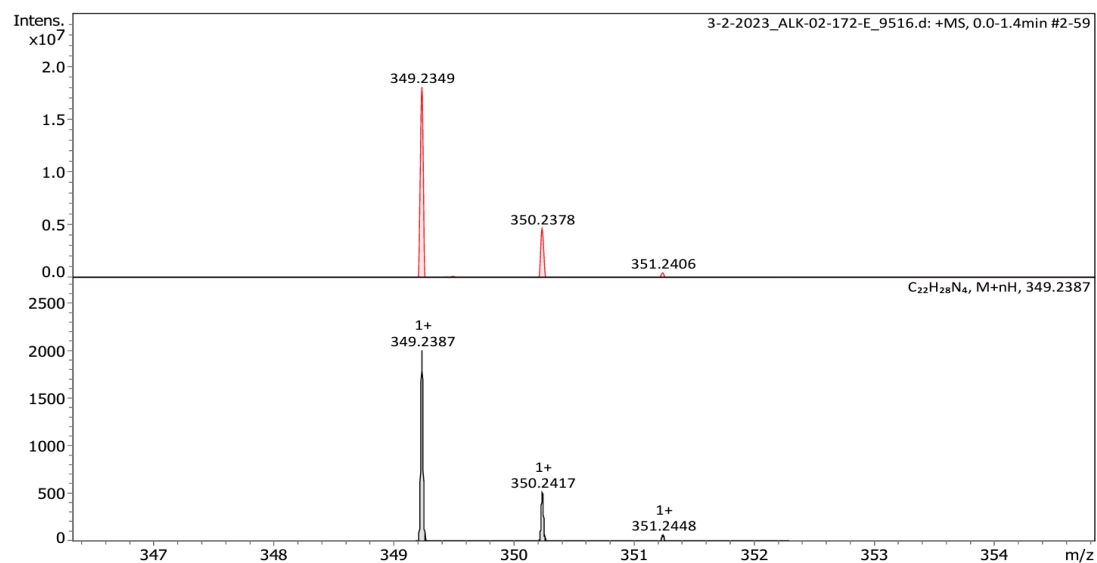

**Figure S73.** APCI high-resolution mass spectrum of (2-tert-butyl)(4-tetramethylguanidino)phenanthridine ( $\text{tBuL1}$ ).

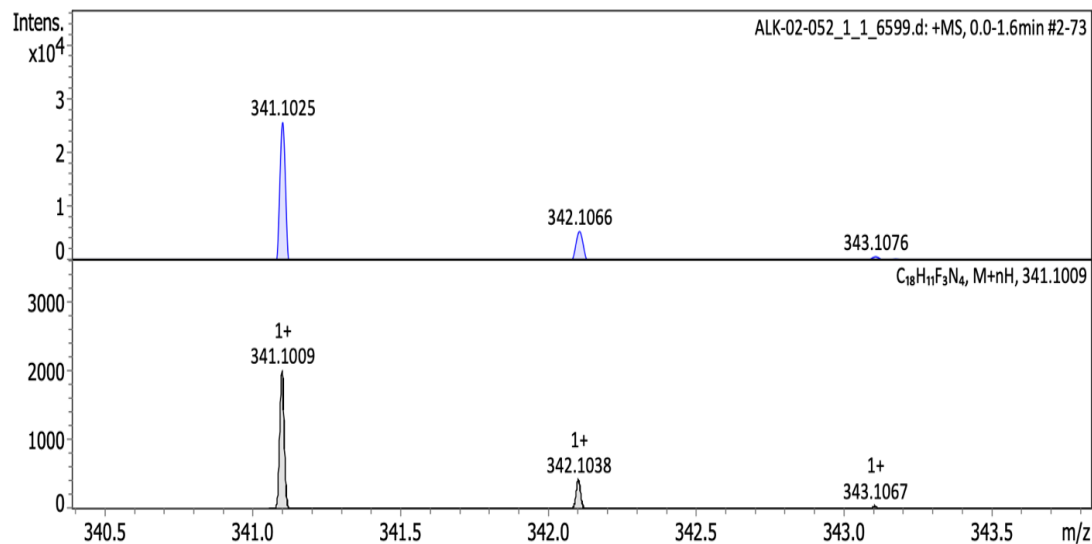

**Figure S74.** APCI high-resolution mass spectrum of (4-aminopyrimidino)(2-trifluoromethyl)phenanthridine ( $\text{CF}_3\text{L2}$ ).

### Coordinates of optimized geometries

( $\text{CF}_3\text{L1}$ ) $\text{ZnCl}_2$  ( $\text{S}_{0,\text{eq}}$ ) M06-L (gas phase/ def2-tzvpp def2/j)

|    |          |          |          |
|----|----------|----------|----------|
| Zn | 8.85735  | 10.12510 | 6.22951  |
| Cl | 8.44462  | 9.08804  | 4.33155  |
| Cl | 10.81542 | 10.20198 | 7.32627  |
| N  | 7.73977  | 11.93012 | 6.14475  |
| N  | 7.64754  | 9.98392  | 7.97050  |
| N  | 8.52473  | 7.97841  | 8.69628  |
| N  | 8.51987  | 9.78284  | 10.16841 |
| C  | 6.85201  | 11.08474 | 8.19320  |
| C  | 5.99416  | 11.25357 | 9.27797  |
| H  | 5.93885  | 10.48605 | 10.05293 |
| C  | 6.04258  | 13.25558 | 7.29158  |
| C  | 5.21394  | 13.39427 | 8.42291  |
| H  | 4.58044  | 14.27153 | 8.54688  |
| C  | 6.87476  | 12.11167 | 7.19339  |
| C  | 6.09946  | 14.22517 | 6.22013  |
| C  | 5.20569  | 12.40687 | 9.39297  |
| C  | 8.20005  | 9.27025  | 8.94436  |
| C  | 5.32173  | 15.40045 | 6.18551  |
| H  | 4.63255  | 15.62300 | 7.00147  |
| C  | 7.96623  | 7.29962  | 7.54331  |
| H  | 6.97239  | 7.69379  | 7.30912  |
| H  | 8.59709  | 7.42622  | 6.64569  |
| H  | 7.88610  | 6.22565  | 7.76103  |
| C  | 6.98425  | 13.97322 | 5.13344  |
| F  | 3.64445  | 13.66901 | 10.64408 |
| C  | 5.41714  | 16.27987 | 5.12212  |
| H  | 4.80442  | 17.18409 | 5.11544  |
| C  | 7.78108  | 12.79322 | 5.16660  |

|   |          |          |          |
|---|----------|----------|----------|
| H | 8.46629  | 12.57333 | 4.33936  |
| C | 8.46313  | 8.99545  | 11.37756 |
| H | 7.84992  | 9.51789  | 12.13060 |
| H | 7.99832  | 8.02367  | 11.17812 |
| H | 9.45864  | 8.82314  | 11.81962 |
| C | 8.92267  | 11.16369 | 10.32000 |
| H | 9.21966  | 11.57141 | 9.34619  |
| H | 8.13082  | 11.79041 | 10.76765 |
| H | 9.80645  | 11.20698 | 10.97385 |
| F | 3.52158  | 11.51435 | 10.77483 |
| C | 9.74972  | 7.39949  | 9.21681  |
| H | 10.34098 | 8.15924  | 9.73680  |
| H | 9.55578  | 6.55120  | 9.89239  |
| H | 10.36200 | 7.04456  | 8.37525  |
| C | 4.36945  | 12.54492 | 10.63090 |
| C | 6.29068  | 16.02426 | 4.04970  |
| H | 6.35314  | 16.72759 | 3.21708  |
| C | 7.06560  | 14.88242 | 4.05667  |
| H | 7.75049  | 14.66547 | 3.23319  |
| F | 5.14606  | 12.55629 | 11.73277 |

(CF<sup>3</sup>L1)ZnCl<sub>2</sub> (S<sub>0,eq</sub>) B3LYP (SMD “dichloromethane”/ def2-tzvpp def2/j)

|    |          |          |          |
|----|----------|----------|----------|
| Zn | 8.87197  | 10.20603 | 6.22852  |
| Cl | 8.35755  | 9.04304  | 4.36848  |
| Cl | 11.03535 | 10.29404 | 6.88882  |
| N  | 7.79920  | 12.01915 | 6.13694  |
| C  | 7.84597  | 12.90009 | 5.17342  |
| H  | 8.55934  | 12.72243 | 4.36111  |
| C  | 7.01073  | 14.05991 | 5.13406  |
| C  | 7.10651  | 14.98849 | 4.06796  |
| H  | 7.83344  | 14.80729 | 3.27175  |
| C  | 6.28839  | 16.10340 | 4.04421  |
| H  | 6.35812  | 16.82284 | 3.22458  |
| C  | 5.35780  | 16.31036 | 5.08633  |
| H  | 4.71161  | 17.19198 | 5.06468  |
| C  | 5.24947  | 15.41195 | 6.13759  |
| H  | 4.51958  | 15.60131 | 6.92577  |
| C  | 6.07362  | 14.26247 | 6.19000  |
| C  | 6.02152  | 13.27243 | 7.25602  |
| C  | 6.90817  | 12.16436 | 7.17993  |
| C  | 6.91526  | 11.13847 | 8.18990  |
| C  | 6.01460  | 11.26419 | 9.24981  |
| H  | 5.97379  | 10.49654 | 10.02328 |
| C  | 5.15085  | 12.37306 | 9.32752  |
| C  | 5.14019  | 13.36406 | 8.35803  |
| H  | 4.45413  | 14.20420 | 8.45128  |
| C  | 4.25132  | 12.47448 | 10.53305 |
| F  | 3.33965  | 13.45548 | 10.42367 |
| F  | 3.57626  | 11.32847 | 10.75629 |
| F  | 4.95992  | 12.72141 | 11.65803 |
| N  | 7.77321  | 10.06515 | 7.99520  |
| C  | 8.25827  | 9.30296  | 8.98681  |
| N  | 8.50335  | 7.99483  | 8.73187  |
| C  | 7.79586  | 7.28736  | 7.66982  |
| H  | 6.83015  | 7.76661  | 7.46901  |
| H  | 8.37427  | 7.27215  | 6.73025  |
| H  | 7.62053  | 6.24812  | 7.99149  |
| C  | 9.66054  | 7.29416  | 9.28085  |
| H  | 10.32354 | 7.99392  | 9.80219  |
| H  | 9.36594  | 6.48702  | 9.97214  |

|   |          |          |          |
|---|----------|----------|----------|
| H | 10.22914 | 6.84762  | 8.44835  |
| N | 8.58672  | 9.79944  | 10.21184 |
| C | 8.45717  | 9.02594  | 11.44183 |
| H | 7.88900  | 9.61951  | 12.17853 |
| H | 7.90766  | 8.09510  | 11.25592 |
| H | 9.43788  | 8.78186  | 11.88428 |
| C | 9.03996  | 11.17458 | 10.37732 |
| H | 9.40324  | 11.56803 | 9.41954  |
| H | 8.24633  | 11.83347 | 10.77102 |
| H | 9.87960  | 11.18396 | 11.09145 |

(**CF<sup>3</sup>L1**)ZnCl<sub>2</sub> (S<sub>1,eq</sub>) B3LYP (SMD “dichloromethane”/ def2-tzvpp def2/j)

|    |          |          |          |
|----|----------|----------|----------|
| Zn | 9.17824  | 10.46120 | 6.26268  |
| Cl | 9.04752  | 8.98536  | 4.56683  |
| Cl | 11.20504 | 10.72920 | 7.24829  |
| N  | 7.92757  | 12.05570 | 6.12758  |
| N  | 7.95844  | 10.18006 | 8.02427  |
| N  | 8.38619  | 8.01187  | 8.72542  |
| N  | 8.76615  | 9.78758  | 10.21467 |
| C  | 7.05749  | 11.17467 | 8.19323  |
| C  | 6.14432  | 11.25084 | 9.27359  |
| H  | 6.15760  | 10.47917 | 10.04457 |
| C  | 6.07502  | 13.21992 | 7.21596  |
| C  | 5.18539  | 13.26093 | 8.32742  |
| H  | 4.45360  | 14.06483 | 8.39811  |
| C  | 7.01941  | 12.17950 | 7.13849  |
| C  | 6.04360  | 14.23120 | 6.15177  |
| C  | 5.21818  | 12.29740 | 9.33731  |
| C  | 8.35315  | 9.31878  | 9.02115  |
| C  | 5.16270  | 15.31850 | 6.11728  |
| H  | 4.43735  | 15.46205 | 6.92075  |
| C  | 7.54788  | 7.47317  | 7.64896  |
| H  | 6.63441  | 8.07040  | 7.54307  |
| H  | 8.09073  | 7.47496  | 6.68957  |
| H  | 7.26803  | 6.44245  | 7.91197  |
| C  | 6.99960  | 14.05647 | 5.07870  |
| F  | 3.35534  | 13.32813 | 10.37678 |
| C  | 5.18540  | 16.24202 | 5.05900  |
| H  | 4.48766  | 17.08244 | 5.05224  |
| C  | 7.89080  | 12.97518 | 5.11578  |
| H  | 8.61097  | 12.83176 | 4.30605  |
| C  | 8.69103  | 8.99726  | 11.44464 |
| H  | 8.27864  | 9.64456  | 12.23440 |
| H  | 8.02000  | 8.14148  | 11.30885 |
| H  | 9.68266  | 8.64273  | 11.76722 |
| C  | 9.28853  | 11.14834 | 10.37465 |
| H  | 9.62579  | 11.53953 | 9.40775  |
| H  | 8.53358  | 11.81542 | 10.82160 |
| H  | 10.15770 | 11.10147 | 11.04814 |
| F  | 3.64672  | 11.20834 | 10.72913 |
| C  | 9.39791  | 7.09947  | 9.26310  |
| H  | 10.22413 | 7.66804  | 9.70506  |
| H  | 8.97795  | 6.40816  | 10.01023 |
| H  | 9.79544  | 6.50914  | 8.42328  |
| C  | 4.29053  | 12.37503 | 10.51835 |
| C  | 6.11204  | 16.07418 | 4.00835  |
| H  | 6.12967  | 16.79303 | 3.18344  |
| C  | 7.00031  | 15.01132 | 4.00774  |
| H  | 7.71804  | 14.88554 | 3.19251  |
| F  | 4.96164  | 12.64520 | 11.66080 |

(<sup>1</sup>BuL1)ZnCl<sub>2</sub> (S<sub>0,eq</sub>) M06-L (gas phase/ def2-tzvpp def2/j)

|    |          |          |          |
|----|----------|----------|----------|
| Zn | 8.77870  | 10.05365 | 6.18620  |
| Cl | 8.27089  | 8.97853  | 4.33184  |
| Cl | 10.79380 | 10.08421 | 7.18694  |
| N  | 7.73826  | 11.89825 | 6.12699  |
| N  | 7.62904  | 9.95715  | 7.96691  |
| N  | 8.53203  | 7.97606  | 8.73006  |
| N  | 8.59605  | 9.84137  | 10.12744 |
| C  | 6.84763  | 11.07611 | 8.18608  |
| C  | 5.99032  | 11.25436 | 9.26800  |
| H  | 5.94615  | 10.46708 | 10.02536 |
| C  | 6.06859  | 13.24577 | 7.29474  |
| C  | 5.23515  | 13.38083 | 8.42384  |
| H  | 4.61517  | 14.27141 | 8.51580  |
| C  | 6.88523  | 12.09352 | 7.18333  |
| C  | 6.14404  | 14.22394 | 6.23142  |
| C  | 5.18637  | 12.40278 | 9.41083  |
| C  | 8.22030  | 9.27985  | 8.93903  |
| C  | 5.39264  | 15.41749 | 6.20749  |
| H  | 4.71040  | 15.64766 | 7.02720  |
| C  | 7.93214  | 7.26516  | 7.61825  |
| H  | 6.92301  | 7.64123  | 7.42198  |
| H  | 8.51771  | 7.38167  | 6.68871  |
| H  | 7.87873  | 6.19498  | 7.86170  |
| C  | 7.02211  | 13.96563 | 5.13989  |
| C  | 3.50290  | 13.82770 | 10.66111 |
| C  | 5.50557  | 16.30644 | 5.15397  |
| H  | 4.91296  | 17.22418 | 5.15823  |
| C  | 7.79289  | 12.76783 | 5.15529  |
| H  | 8.46583  | 12.54053 | 4.32017  |
| C  | 8.58977  | 9.10891  | 11.36994 |
| H  | 8.00268  | 9.65684  | 12.12655 |
| H  | 8.12589  | 8.12612  | 11.22949 |
| H  | 9.60257  | 8.95992  | 11.78129 |
| C  | 9.02113  | 11.22210 | 10.18822 |
| H  | 9.30418  | 11.56358 | 9.18484  |
| H  | 8.24815  | 11.89135 | 10.60591 |
| H  | 9.91856  | 11.29174 | 10.82107 |
| C  | 3.30136  | 11.35348 | 10.66905 |
| C  | 9.78274  | 7.41723  | 9.20912  |
| H  | 10.37955 | 8.18515  | 9.70992  |
| H  | 9.62185  | 6.56707  | 9.89130  |
| H  | 10.37475 | 7.07248  | 8.34858  |
| C  | 4.29293  | 12.52233 | 10.64650 |
| C  | 6.37194  | 16.04343 | 4.07752  |
| H  | 6.44922  | 16.75369 | 3.25192  |
| C  | 7.12109  | 14.88459 | 4.07270  |
| H  | 7.80026  | 14.66102 | 3.24605  |
| C  | 5.16890  | 12.47239 | 11.90439 |
| H  | 2.82958  | 13.91293 | 9.79573  |
| H  | 4.16028  | 14.70953 | 10.66716 |
| H  | 2.87818  | 13.88179 | 11.56407 |
| H  | 5.90266  | 13.29243 | 11.91493 |
| H  | 5.72703  | 11.52791 | 11.98455 |
| H  | 4.55239  | 12.56411 | 12.81129 |
| H  | 2.65884  | 11.35686 | 9.77658  |
| H  | 2.64795  | 11.41664 | 11.55226 |
| H  | 3.80785  | 10.37861 | 10.70587 |

(<sup>t</sup>BuL1)ZnCl<sub>2</sub> (S<sub>0,eq</sub>) B3LYP (SMD “dichloromethane”/ def2-tzvp def2/j)

|    |          |          |          |
|----|----------|----------|----------|
| Zn | 8.84287  | 10.16366 | 6.19944  |
| Cl | 8.27707  | 8.97220  | 4.37081  |
| Cl | 11.03286 | 10.22975 | 6.78513  |
| N  | 7.81070  | 11.99389 | 6.11472  |
| N  | 7.79254  | 10.05557 | 7.99645  |
| N  | 8.52158  | 7.98464  | 8.73166  |
| N  | 8.72762  | 9.81594  | 10.16739 |
| C  | 6.96390  | 11.15760 | 8.20621  |
| C  | 6.09008  | 11.31198 | 9.28395  |
| H  | 6.07572  | 10.53978 | 10.05382 |
| C  | 6.08666  | 13.28481 | 7.27958  |
| C  | 5.22986  | 13.39128 | 8.40067  |
| H  | 4.56632  | 14.24967 | 8.47030  |
| C  | 6.95481  | 12.16535 | 7.18333  |
| C  | 6.12766  | 14.26595 | 6.20364  |
| C  | 5.21665  | 12.42115 | 9.40103  |
| C  | 8.31654  | 9.30516  | 8.97247  |
| C  | 5.32411  | 15.43185 | 6.16408  |
| H  | 4.62301  | 15.64238 | 6.97269  |
| C  | 7.74035  | 7.27485  | 7.72478  |
| H  | 6.76717  | 7.76090  | 7.58467  |
| H  | 8.25340  | 7.24756  | 6.74795  |
| H  | 7.57811  | 6.23950  | 8.06577  |
| C  | 7.02824  | 14.03895 | 5.12018  |
| C  | 3.40355  | 13.77466 | 10.59994 |
| C  | 5.41500  | 16.31972 | 5.10254  |
| H  | 4.78441  | 17.21292 | 5.09357  |
| C  | 7.84404  | 12.86426 | 5.14128  |
| H  | 8.52698  | 12.66639 | 4.30782  |
| C  | 8.66787  | 9.06500  | 11.41554 |
| H  | 8.16334  | 9.67891  | 12.18114 |
| H  | 8.09040  | 8.14199  | 11.28221 |
| H  | 9.67168  | 8.80745  | 11.79473 |
| C  | 9.22226  | 11.18222 | 10.27186 |
| H  | 9.54818  | 11.53828 | 9.28642  |
| H  | 8.46663  | 11.87476 | 10.68167 |
| H  | 10.09597 | 11.18927 | 10.94393 |
| C  | 3.33662  | 11.27553 | 10.62824 |
| C  | 9.70555  | 7.27735  | 9.20973  |
| H  | 10.40320 | 7.97239  | 9.69017  |
| H  | 9.44817  | 6.47245  | 9.91857  |
| H  | 10.22223 | 6.82624  | 8.34600  |
| C  | 4.27440  | 12.50556 | 10.62083 |
| C  | 6.30846  | 16.08695 | 4.03354  |
| H  | 6.36552  | 16.79752 | 3.20513  |
| C  | 7.10639  | 14.95741 | 4.04337  |
| H  | 7.80462  | 14.75608 | 3.22638  |
| C  | 5.11107  | 12.51657 | 11.92133 |
| H  | 2.75191  | 13.81584 | 9.71263  |
| H  | 4.01087  | 14.69373 | 10.62147 |
| H  | 2.75120  | 13.78968 | 11.48776 |
| H  | 5.80096  | 13.37642 | 11.94552 |
| H  | 5.70861  | 11.59913 | 12.03693 |
| H  | 4.44827  | 12.59118 | 12.79966 |
| H  | 2.71931  | 11.23972 | 9.71539  |
| H  | 2.65548  | 11.32043 | 11.49455 |
| H  | 3.89594  | 10.32921 | 10.69502 |

(<sup>Bu</sup>L1)ZnCl<sub>2</sub> (S<sub>1,eq</sub>) B3LYP (SMD “dichloromethane”/ def2-tzvp def2/j)

|    |          |          |          |
|----|----------|----------|----------|
| Zn | 8.99271  | 10.30373 | 6.14446  |
| Cl | 8.48543  | 8.84925  | 4.49477  |
| Cl | 11.12763 | 10.32505 | 6.91560  |
| N  | 7.91328  | 12.01924 | 6.09102  |
| N  | 7.91639  | 10.15905 | 8.01034  |
| N  | 8.36731  | 8.02512  | 8.80839  |
| N  | 8.88215  | 9.88178  | 10.14734 |
| C  | 7.05327  | 11.18625 | 8.18725  |
| C  | 6.16148  | 11.29717 | 9.28724  |
| H  | 6.19045  | 10.51669 | 10.04884 |
| C  | 6.13177  | 13.24919 | 7.23572  |
| C  | 5.24888  | 13.30387 | 8.36228  |
| H  | 4.54766  | 14.13376 | 8.41243  |
| C  | 7.02866  | 12.17974 | 7.12808  |
| C  | 6.12919  | 14.27973 | 6.19076  |
| C  | 5.23934  | 12.34756 | 9.38942  |
| C  | 8.36779  | 9.34943  | 9.01973  |
| C  | 5.30852  | 15.41422 | 6.19442  |
| H  | 4.61330  | 15.58378 | 7.01917  |
| C  | 7.45495  | 7.43132  | 7.82696  |
| H  | 6.54097  | 8.03183  | 7.74610  |
| H  | 7.92804  | 7.37054  | 6.83304  |
| H  | 7.18706  | 6.42088  | 8.16920  |
| C  | 7.05409  | 14.07476 | 5.09325  |
| C  | 3.33478  | 13.62865 | 10.50901 |
| C  | 5.35564  | 16.35541 | 5.15120  |
| H  | 4.70454  | 17.23214 | 5.17471  |
| C  | 7.89078  | 12.95150 | 5.09284  |
| H  | 8.58280  | 12.78833 | 4.26201  |
| C  | 8.87775  | 9.17703  | 11.42925 |
| H  | 8.53229  | 9.88209  | 12.20175 |
| H  | 8.18317  | 8.32969  | 11.39652 |
| H  | 9.88197  | 8.82025  | 11.70822 |
| C  | 9.44617  | 11.23419 | 10.17054 |
| H  | 9.74714  | 11.53230 | 9.15925  |
| H  | 8.73274  | 11.96263 | 10.58889 |
| H  | 10.34389 | 11.21742 | 10.80684 |
| C  | 3.39241  | 11.12640 | 10.58438 |
| C  | 9.41711  | 7.14227  | 9.32148  |
| H  | 10.27620 | 7.73384  | 9.65836  |
| H  | 9.05840  | 6.50380  | 10.14393 |
| H  | 9.74743  | 6.49608  | 8.49382  |
| C  | 4.26495  | 12.40429 | 10.58092 |
| C  | 6.24863  | 16.15590 | 4.07600  |
| H  | 6.28594  | 16.88707 | 3.26231  |
| C  | 7.07951  | 15.04924 | 4.03709  |
| H  | 7.77185  | 14.90158 | 3.20355  |
| C  | 5.07182  | 12.47951 | 11.89864 |
| H  | 2.71008  | 13.61635 | 9.60168  |
| H  | 3.89926  | 14.57460 | 10.52534 |
| H  | 2.65945  | 13.62721 | 11.37897 |
| H  | 5.69762  | 13.38650 | 11.92668 |
| H  | 5.73028  | 11.60581 | 12.02614 |
| H  | 4.38557  | 12.51068 | 12.76089 |
| H  | 2.80379  | 11.04842 | 9.65574  |
| H  | 2.68986  | 11.14988 | 11.43365 |
| H  | 4.00272  | 10.21452 | 10.67918 |

(CF<sup>3</sup>L2)<sub>2</sub>Zn (S<sub>0,eq</sub>) M06-L (gas phase/ def2-tzvpp def2/j)

|    |          |          |          |
|----|----------|----------|----------|
| Zn | 10.04516 | 7.34683  | 2.39085  |
| N  | 9.51023  | 7.69062  | 4.26095  |
| N  | 11.33713 | 5.98224  | 3.46464  |
| F  | 9.08485  | 6.07313  | 9.26318  |
| N  | 7.99012  | 9.03812  | 5.49407  |
| F  | 11.16086 | 5.75514  | 9.75878  |
| N  | 8.19417  | 9.08905  | 3.10638  |
| C  | 8.54040  | 8.62557  | 4.33964  |
| C  | 10.13043 | 7.00509  | 5.25816  |
| F  | 10.43007 | 7.75067  | 9.38447  |
| C  | 11.13582 | 6.07571  | 4.81661  |
| C  | 11.87997 | 5.30229  | 5.73264  |
| C  | 11.61605 | 5.44152  | 7.10233  |
| H  | 12.16387 | 4.86656  | 7.83282  |
| C  | 6.63244  | 10.51177 | 4.19343  |
| H  | 5.86758  | 11.27169 | 4.14083  |
| C  | 12.24052 | 5.17502  | 2.98972  |
| H  | 12.35888 | 5.14779  | 1.90862  |
| C  | 9.90677  | 7.10327  | 6.62857  |
| H  | 9.15765  | 7.79010  | 6.99103  |
| C  | 10.64640 | 6.32586  | 7.51882  |
| C  | 7.05148  | 9.97129  | 5.39558  |
| H  | 6.61279  | 10.30160 | 6.33407  |
| C  | 13.05763 | 4.35211  | 3.80220  |
| C  | 12.87904 | 4.40825  | 5.20604  |
| C  | 7.25672  | 10.01510 | 3.05608  |
| H  | 6.99101  | 10.37771 | 2.06657  |
| C  | 14.63055 | 2.75908  | 5.43704  |
| H  | 15.24632 | 2.13655  | 6.07347  |
| C  | 14.02243 | 3.49810  | 3.24198  |
| H  | 14.13781 | 3.47645  | 2.16491  |
| C  | 10.33828 | 6.47321  | 8.97971  |
| C  | 14.80173 | 2.70936  | 4.04821  |
| H  | 15.54521 | 2.05185  | 3.61786  |
| C  | 13.69227 | 3.58799  | 6.00425  |
| H  | 13.58381 | 3.60564  | 7.07975  |
| N  | 10.60978 | 7.67442  | 0.52629  |
| N  | 8.66857  | 6.08689  | 1.30397  |
| F  | 10.63280 | 7.39471  | -4.51712 |
| N  | 12.21550 | 8.93528  | -0.69053 |
| F  | 9.97064  | 5.35523  | -4.75770 |
| N  | 12.01985 | 8.96259  | 1.69820  |
| C  | 11.64081 | 8.54284  | 0.45893  |
| C  | 9.94264  | 7.04506  | -0.47706 |
| F  | 8.54931  | 6.96854  | -4.88303 |
| C  | 8.87950  | 6.18047  | -0.04686 |
| C  | 8.08704  | 5.46589  | -0.97286 |
| C  | 8.36078  | 5.60627  | -2.33661 |
| H  | 7.77840  | 5.07606  | -3.07663 |
| C  | 13.67009 | 10.29570 | 0.62843  |
| H  | 14.48333 | 11.00288 | 0.69017  |
| C  | 7.71380  | 5.33623  | 1.77000  |
| H  | 7.59088  | 5.30810  | 2.85061  |
| C  | 10.17385 | 7.14919  | -1.84938 |
| H  | 10.96488 | 7.79061  | -2.20151 |
| C  | 9.38729  | 6.43456  | -2.74541 |
| C  | 13.21433 | 9.80250  | -0.58049 |
| H  | 13.67261 | 10.11695 | -1.51506 |

|   |          |          |          |
|---|----------|----------|----------|
| C | 6.84777  | 4.57348  | 0.94790  |
| C | 7.03255  | 4.63018  | -0.45468 |
| C | 13.01661 | 9.82371  | 1.75989  |
| H | 13.30776 | 10.15244 | 2.75409  |
| C | 5.18381  | 3.09386  | -0.70362 |
| H | 4.53343  | 2.51492  | -1.34666 |
| C | 5.83074  | 3.77651  | 1.49872  |
| H | 5.71147  | 3.75285  | 2.57532  |
| C | 9.64379  | 6.54738  | -4.22020 |
| C | 5.00651  | 3.04340  | 0.68401  |
| H | 4.22295  | 2.42920  | 1.10717  |
| C | 6.17302  | 3.86876  | -1.26159 |
| H | 6.28598  | 3.88889  | -2.33665 |

(CF<sup>3</sup>L2)<sub>2</sub>Zn (S<sub>0,eq</sub>) B3LYP (SMD “dichloromethane”/ def2-tzvpp def2/j)

|    |          |          |          |
|----|----------|----------|----------|
| Zn | 10.03615 | 7.15726  | 2.38825  |
| N  | 9.52103  | 7.69030  | 4.23990  |
| N  | 11.31461 | 5.86941  | 3.49471  |
| F  | 9.19211  | 6.49485  | 9.36549  |
| N  | 8.08959  | 9.15160  | 5.46932  |
| F  | 11.23919 | 5.97220  | 9.83701  |
| N  | 8.15180  | 9.07805  | 3.07889  |
| C  | 8.56976  | 8.65814  | 4.30809  |
| C  | 10.16686 | 7.04146  | 5.26254  |
| F  | 10.72186 | 8.02013  | 9.36327  |
| C  | 11.14388 | 6.05068  | 4.85123  |
| C  | 11.88921 | 5.30096  | 5.79922  |
| C  | 11.66719 | 5.52977  | 7.17752  |
| H  | 12.22150 | 4.97096  | 7.92905  |
| C  | 6.67296  | 10.59832 | 4.18283  |
| H  | 5.91191  | 11.37860 | 4.13587  |
| C  | 12.17585 | 4.99876  | 3.03783  |
| H  | 12.26790 | 4.90164  | 1.95025  |
| C  | 9.98675  | 7.22949  | 6.64061  |
| H  | 9.26075  | 7.96606  | 6.97695  |
| C  | 10.73262 | 6.47650  | 7.56721  |
| C  | 7.15818  | 10.10509 | 5.39280  |
| H  | 6.77975  | 10.49543 | 6.34597  |
| C  | 12.98740 | 4.18470  | 3.88718  |
| C  | 12.85002 | 4.32870  | 5.29932  |
| C  | 7.22611  | 10.02601 | 3.02905  |
| H  | 6.90381  | 10.35087 | 2.03186  |
| C  | 14.55260 | 2.61119  | 5.58296  |
| H  | 15.16655 | 1.99393  | 6.24439  |
| C  | 13.90811 | 3.25374  | 3.34371  |
| H  | 13.99241 | 3.16505  | 2.25714  |
| C  | 10.47818 | 6.73456  | 9.03070  |
| C  | 14.68323 | 2.47444  | 4.18273  |
| H  | 15.39457 | 1.75524  | 3.76910  |
| C  | 13.65758 | 3.51662  | 6.13247  |
| H  | 13.58171 | 3.59762  | 7.21775  |
| N  | 10.57467 | 7.68071  | 0.54132  |
| N  | 8.69113  | 5.94683  | 1.27196  |
| F  | 10.82474 | 6.58997  | -4.59573 |
| N  | 12.09894 | 9.05550  | -0.67605 |
| F  | 8.76906  | 6.10345  | -5.06917 |
| N  | 12.01612 | 8.98273  | 1.71382  |
| C  | 11.58155 | 8.59102  | 0.48107  |

|   |          |          |          |
|---|----------|----------|----------|
| C | 9.89204  | 7.07932  | -0.48635 |
| F | 9.31831  | 8.13819  | -4.57552 |
| C | 8.86497  | 6.13714  | -0.08297 |
| C | 8.07596  | 5.44164  | -1.03695 |
| C | 8.30338  | 5.67722  | -2.41322 |
| H | 7.71556  | 5.16027  | -3.16929 |
| C | 13.59560 | 10.40779 | 0.62257  |
| H | 14.40397 | 11.13848 | 0.67600  |
| C | 7.78661  | 5.11732  | 1.72170  |
| H | 7.69443  | 5.01045  | 2.80837  |
| C | 10.07678 | 7.27519  | -1.86272 |
| H | 10.84139 | 7.97454  | -2.19296 |
| C | 9.28668  | 6.57657  | -2.79527 |
| C | 13.08804 | 9.94829  | -0.59151 |
| H | 13.49659 | 10.31560 | -1.54139 |
| C | 6.92870  | 4.35947  | 0.86588  |
| C | 7.06686  | 4.51533  | -0.54495 |
| C | 12.99929 | 9.87041  | 1.77161  |
| H | 13.33421 | 10.17344 | 2.77152  |
| C | 5.27337  | 2.89550  | -0.84235 |
| H | 4.62413  | 2.32116  | -1.50872 |
| C | 5.96197  | 3.47184  | 1.40178  |
| H | 5.87826  | 3.37279  | 2.48751  |
| C | 9.54317  | 6.84549  | -4.25642 |
| C | 5.14201  | 2.74697  | 0.55660  |
| H | 4.39486  | 2.06154  | 0.96441  |
| C | 6.21335  | 3.75884  | -1.38453 |
| H | 6.28907  | 3.84952  | -2.46901 |

(CF<sup>3</sup>L2)<sub>2</sub>Zn (S<sub>1,eq</sub>) B3LYP (SMD “dichloromethane”/ def2-tzvpp def2/j)

|    |          |          |         |
|----|----------|----------|---------|
| Zn | 9.95754  | 6.97332  | 2.40522 |
| N  | 9.56458  | 7.67490  | 4.22933 |
| N  | 11.28406 | 5.76251  | 3.53376 |
| F  | 9.28502  | 6.64567  | 9.39582 |
| N  | 8.26831  | 9.28729  | 5.41772 |
| F  | 11.34148 | 6.15739  | 9.86396 |
| N  | 8.22600  | 9.06668  | 3.03334 |
| C  | 8.67009  | 8.69742  | 4.27046 |
| C  | 10.21497 | 7.05697  | 5.26745 |
| F  | 10.80156 | 8.18390  | 9.32320 |
| C  | 11.15483 | 6.01996  | 4.88338 |
| C  | 11.90386 | 5.29856  | 5.85011 |
| C  | 11.71172 | 5.59130  | 7.22086 |
| H  | 12.26329 | 5.04895  | 7.98638 |
| C  | 6.87808  | 10.73202 | 4.09799 |
| H  | 6.15822  | 11.54910 | 4.03195 |
| C  | 12.11086 | 4.84556  | 3.10273 |
| H  | 12.16522 | 4.68175  | 2.02065 |
| C  | 10.06636 | 7.31064  | 6.63874 |
| H  | 9.36780  | 8.08138  | 6.95534 |
| C  | 10.80572 | 6.57554  | 7.58456 |
| C  | 7.38760  | 10.28629 | 5.31680 |
| H  | 7.07265  | 10.75499 | 6.25777 |
| C  | 12.93113 | 4.06312  | 3.97317 |
| C  | 12.83465 | 4.28454  | 5.37833 |
| C  | 7.35067  | 10.06082 | 2.96165 |
| H  | 7.00457  | 10.34289 | 1.95931 |
| C  | 14.51769 | 2.55600  | 5.70972 |

|   |          |          |          |
|---|----------|----------|----------|
| H | 15.14072 | 1.96560  | 6.38698  |
| C | 13.82084 | 3.08771  | 3.45616  |
| H | 13.87254 | 2.93960  | 2.37403  |
| C | 10.56605 | 6.88503  | 9.04011  |
| C | 14.60687 | 2.34122  | 4.31531  |
| H | 15.29487 | 1.58843  | 3.92259  |
| C | 13.65180 | 3.50486  | 6.23299  |
| H | 13.60783 | 3.64729  | 7.31364  |
| N | 10.53532 | 7.63888  | 0.54311  |
| N | 8.72215  | 5.85323  | 1.26039  |
| F | 10.04963 | 8.18205  | -4.49700 |
| N | 12.01503 | 9.10457  | -0.61981 |
| F | 9.98971  | 6.06060  | -4.92167 |
| N | 12.01516 | 8.84919  | 1.76259  |
| C | 11.54672 | 8.55939  | 0.52076  |
| C | 9.82789  | 7.09800  | -0.48975 |
| F | 8.15778  | 7.20346  | -4.90713 |
| C | 8.83336  | 6.11272  | -0.07852 |
| C | 8.03875  | 5.47389  | -1.05390 |
| C | 8.22165  | 5.82013  | -2.41695 |
| H | 7.60627  | 5.34070  | -3.17934 |
| C | 13.55114 | 10.35413 | 0.72575  |
| H | 14.36128 | 11.08052 | 0.80476  |
| C | 7.80259  | 4.93306  | 1.67179  |
| H | 7.74158  | 4.75865  | 2.74946  |
| C | 9.97396  | 7.40374  | -1.86056 |
| H | 10.71568 | 8.14191  | -2.15326 |
| C | 9.16915  | 6.76663  | -2.81331 |
| C | 13.00402 | 9.99007  | -0.50880 |
| H | 13.37969 | 10.43005 | -1.43977 |
| C | 6.96310  | 4.22626  | 0.79775  |
| C | 7.04980  | 4.47352  | -0.62367 |
| C | 13.00072 | 9.73301  | 1.85614  |
| H | 13.37181 | 9.96097  | 2.86187  |
| C | 5.28954  | 2.82161  | -1.01321 |
| H | 4.64639  | 2.28180  | -1.71199 |
| C | 6.01285  | 3.25937  | 1.26525  |
| H | 5.94235  | 3.06944  | 2.33995  |
| C | 9.34276  | 7.05940  | -4.27702 |
| C | 5.20017  | 2.57843  | 0.37340  |
| H | 4.48129  | 1.84398  | 0.74926  |
| C | 6.21235  | 3.76534  | -1.49371 |
| H | 6.26784  | 3.94104  | -2.57009 |

(<sup>CF3</sup>L2)<sub>2</sub>Zn (T<sub>1,eq</sub>) B3LYP (SMD “dichloromethane”/ def2-tzvpp def2/j)

|    |          |          |         |
|----|----------|----------|---------|
| Zn | 9.93363  | 6.94764  | 2.43083 |
| N  | 9.52135  | 7.60813  | 4.26512 |
| N  | 11.25054 | 5.71580  | 3.54501 |
| F  | 9.38297  | 6.65429  | 9.45112 |
| N  | 8.19723  | 9.19030  | 5.46419 |
| F  | 11.44961 | 6.16524  | 9.87039 |
| N  | 8.14587  | 8.97040  | 3.08237 |
| C  | 8.60585  | 8.61050  | 4.31563 |
| C  | 10.20134 | 7.00609  | 5.29324 |
| F  | 10.90119 | 8.18532  | 9.31846 |
| C  | 11.14461 | 5.97763  | 4.89569 |
| C  | 11.92135 | 5.27040  | 5.85105 |
| C  | 11.75987 | 5.57554  | 7.22308 |
| H  | 12.33566 | 5.04722  | 7.98053 |
| C  | 6.76722  | 10.60298 | 4.15468 |

|   |          |          |          |
|---|----------|----------|----------|
| H | 6.02874  | 11.40369 | 4.09347  |
| C | 12.07543 | 4.80334  | 3.10177  |
| H | 12.11279 | 4.63800  | 2.01929  |
| C | 10.08263 | 7.27155  | 6.66518  |
| H | 9.38224  | 8.03736  | 6.99063  |
| C | 10.85450 | 6.55548  | 7.59955  |
| C | 7.29369  | 10.16865 | 5.37008  |
| H | 6.97340  | 10.62972 | 6.31293  |
| C | 12.91619 | 4.02917  | 3.95968  |
| C | 12.84850 | 4.25905  | 5.36546  |
| C | 7.24806  | 9.94375  | 3.01510  |
| H | 6.88990  | 10.21841 | 2.01505  |
| C | 14.54775 | 2.54200  | 5.67071  |
| H | 15.18843 | 1.95937  | 6.33815  |
| C | 13.79988 | 3.05514  | 3.43023  |
| H | 13.83008 | 2.89982  | 2.34830  |
| C | 10.65424 | 6.88416  | 9.05743  |
| C | 14.60772 | 2.31848  | 4.27682  |
| H | 15.29096 | 1.56668  | 3.87395  |
| C | 13.68875 | 3.48952  | 6.20657  |
| H | 13.66815 | 3.63809  | 7.28707  |
| N | 10.53651 | 7.62241  | 0.58905  |
| N | 8.68217  | 5.83925  | 1.24976  |
| F | 10.35213 | 8.02217  | -4.46990 |
| N | 12.06316 | 9.07908  | -0.52933 |
| F | 9.75836  | 5.99534  | -4.95679 |
| N | 11.99254 | 8.82664  | 1.84634  |
| C | 11.55850 | 8.53928  | 0.59479  |
| C | 9.85091  | 7.09386  | -0.44836 |
| F | 8.26256  | 7.54254  | -4.79464 |
| C | 8.82732  | 6.10589  | -0.05480 |
| C | 8.03523  | 5.47271  | -1.07091 |
| C | 8.25721  | 5.81891  | -2.40285 |
| H | 7.66307  | 5.34974  | -3.18916 |
| C | 13.57279 | 10.31638 | 0.85577  |
| H | 14.38708 | 11.03543 | 0.95771  |
| C | 7.74020  | 4.92358  | 1.66694  |
| H | 7.67021  | 4.75521  | 2.74402  |
| C | 10.02504 | 7.40071  | -1.82972 |
| H | 10.78139 | 8.13178  | -2.10297 |
| C | 9.24614  | 6.77958  | -2.78273 |
| C | 13.05770 | 9.95623  | -0.39152 |
| H | 13.46282 | 10.39136 | -1.31258 |
| C | 6.90669  | 4.23623  | 0.77105  |
| C | 7.02697  | 4.48886  | -0.64400 |
| C | 12.98345 | 9.70183  | 1.96872  |
| H | 13.32600 | 9.92767  | 2.98516  |
| C | 5.24683  | 2.87035  | -1.06815 |
| H | 4.60605  | 2.34338  | -1.77946 |
| C | 5.93520  | 3.28660  | 1.21984  |
| H | 5.84469  | 3.09653  | 2.29321  |
| C | 9.41123  | 7.09002  | -4.23871 |
| C | 5.12593  | 2.62135  | 0.31692  |
| H | 4.38802  | 1.89842  | 0.67680  |
| C | 6.18817  | 3.79387  | -1.53028 |
| H | 6.26449  | 3.97100  | -2.60539 |

(CF<sub>3</sub>L2)<sub>2</sub>Zn (S<sub>0,eq</sub>) B3LYP (SMD “diethyl ether”/ def2-tzvpp def2/j)

|    |          |         |         |
|----|----------|---------|---------|
| Zn | 10.03478 | 7.17792 | 2.38893 |
|----|----------|---------|---------|

|   |          |          |          |
|---|----------|----------|----------|
| N | 9.51488  | 7.68745  | 4.24377  |
| N | 11.31642 | 5.87843  | 3.49277  |
| F | 9.18439  | 6.46808  | 9.36404  |
| N | 8.07631  | 9.14018  | 5.47483  |
| F | 11.23387 | 5.95292  | 9.83387  |
| N | 8.14923  | 9.07760  | 3.08437  |
| C | 8.56211  | 8.65350  | 4.31361  |
| C | 10.16108 | 7.03708  | 5.26396  |
| F | 10.70709 | 8.00062  | 9.36895  |
| C | 11.14252 | 6.05220  | 4.84953  |
| C | 11.88947 | 5.30130  | 5.79570  |
| C | 11.66418 | 5.52356  | 7.17414  |
| H | 12.21934 | 4.96483  | 7.92504  |
| C | 6.66594  | 10.59247 | 4.18831  |
| H | 5.90521  | 11.37314 | 4.14156  |
| C | 12.18303 | 5.01513  | 3.03338  |
| H | 12.27804 | 4.92518  | 1.94528  |
| C | 9.97780  | 7.21881  | 6.64258  |
| H | 9.24840  | 7.95174  | 6.98000  |
| C | 10.72525 | 6.46517  | 7.56668  |
| C | 7.14541  | 10.09336 | 5.39844  |
| H | 6.76237  | 10.47853 | 6.35199  |
| C | 12.99682 | 4.20004  | 3.88009  |
| C | 12.85515 | 4.33584  | 5.29255  |
| C | 7.22408  | 10.02534 | 3.03421  |
| H | 6.90645  | 10.35387 | 2.03664  |
| C | 14.56454 | 2.62394  | 5.57159  |
| H | 15.17931 | 2.00576  | 6.23146  |
| C | 13.92330 | 3.27609  | 3.33467  |
| H | 14.01173 | 3.19313  | 2.24789  |
| C | 10.46877 | 6.71611  | 9.03158  |
| C | 14.69963 | 2.49558  | 4.17115  |
| H | 15.41530 | 1.78194  | 3.75526  |
| C | 13.66418 | 3.52242  | 6.12306  |
| H | 13.58487 | 3.59716  | 7.20852  |
| N | 10.58002 | 7.67651  | 0.53848  |
| N | 8.68733  | 5.95653  | 1.27373  |
| F | 10.83801 | 6.56241  | -4.59214 |
| N | 12.10941 | 9.04450  | -0.67995 |
| F | 8.78255  | 6.07482  | -5.06614 |
| N | 12.02055 | 8.97803  | 1.70988  |
| C | 11.58877 | 8.58448  | 0.47699  |
| C | 9.89782  | 7.07351  | -0.48729 |
| F | 9.33283  | 8.11213  | -4.58387 |
| C | 8.86577  | 6.13808  | -0.08141 |
| C | 8.07616  | 5.44085  | -1.03402 |
| C | 8.30871  | 5.66823  | -2.41040 |
| H | 7.72150  | 5.15038  | -3.16624 |
| C | 13.60136 | 10.40095 | 0.61917  |
| H | 14.40901 | 11.13250 | 0.67267  |
| C | 7.77710  | 5.13519  | 1.72570  |
| H | 7.68100  | 5.03653  | 2.81295  |
| C | 10.08731 | 7.26164  | -1.86424 |
| H | 10.85567 | 7.95674  | -2.19527 |
| C | 9.29697  | 6.56163  | -2.79476 |
| C | 13.09764 | 9.93736  | -0.59523 |
| H | 13.50883 | 10.30140 | -1.54535 |
| C | 6.91769  | 4.37608  | 0.87201  |
| C | 7.06145  | 4.52252  | -0.53920 |
| C | 13.00263 | 9.86610  | 1.76831  |
| H | 13.33467 | 10.17097 | 2.76869  |
| C | 5.26073  | 2.90960  | -0.83291 |

|   |         |         |          |
|---|---------|---------|----------|
| H | 4.61092 | 2.33441 | -1.49806 |
| C | 5.94447 | 3.49662 | 1.40945  |
| H | 5.85565 | 3.40427 | 2.49544  |
| C | 9.55678 | 6.82195 | -4.25745 |
| C | 5.12378 | 2.77054 | 0.56631  |
| H | 4.37174 | 2.09158 | 0.97601  |
| C | 6.20678 | 3.76482 | -1.37664 |
| H | 6.28667 | 3.84860 | -2.46135 |

(CF<sup>3</sup>L2)<sub>2</sub>Zn (S<sub>1,eq</sub>) B3LYP (SMD “diethyl ether”/ def2-tzvpp def2/j)

|    |          |          |          |
|----|----------|----------|----------|
| Zn | 9.88616  | 6.99678  | 2.42339  |
| N  | 9.52913  | 7.68226  | 4.25639  |
| N  | 11.24623 | 5.78235  | 3.52304  |
| F  | 9.37591  | 6.67991  | 9.42435  |
| N  | 8.22238  | 9.26583  | 5.47124  |
| F  | 11.43863 | 6.17837  | 9.84936  |
| N  | 8.15633  | 9.06006  | 3.08587  |
| C  | 8.62024  | 8.69081  | 4.31564  |
| C  | 10.20819 | 7.07114  | 5.27896  |
| F  | 10.90033 | 8.20836  | 9.32000  |
| C  | 11.14763 | 6.04172  | 4.87435  |
| C  | 11.92608 | 5.32890  | 5.82472  |
| C  | 11.76397 | 5.62352  | 7.19848  |
| H  | 12.33748 | 5.08853  | 7.95287  |
| C  | 6.78497  | 10.68745 | 4.17782  |
| H  | 6.04649  | 11.48876 | 4.12598  |
| C  | 12.06817 | 4.87044  | 3.07409  |
| H  | 12.09672 | 4.70471  | 1.99117  |
| C  | 10.08984 | 7.32652  | 6.65298  |
| H  | 9.39050  | 8.09098  | 6.98301  |
| C  | 10.85756 | 6.60036  | 7.58197  |
| C  | 7.32019  | 10.24625 | 5.38749  |
| H  | 7.00826  | 10.70340 | 6.33514  |
| C  | 12.91576 | 4.09596  | 3.92551  |
| C  | 12.85308 | 4.32136  | 5.33193  |
| C  | 7.25859  | 10.03451 | 3.03133  |
| H  | 6.89540  | 10.31601 | 2.03488  |
| C  | 14.55813 | 2.60694  | 5.62581  |
| H  | 15.20303 | 2.02399  | 6.28886  |
| C  | 13.79951 | 3.12541  | 3.38972  |
| H  | 13.82498 | 2.97317  | 2.30718  |
| C  | 10.64991 | 6.91176  | 9.04269  |
| C  | 14.61301 | 2.38780  | 4.23043  |
| H  | 15.29622 | 1.63887  | 3.82229  |
| C  | 13.69832 | 3.55074  | 6.16743  |
| H  | 13.68060 | 3.69685  | 7.24832  |
| N  | 10.51441 | 7.63193  | 0.56717  |
| N  | 8.66140  | 5.88037  | 1.27004  |
| F  | 10.01027 | 8.18526  | -4.48093 |
| N  | 12.06529 | 9.02288  | -0.59281 |
| F  | 10.38699 | 6.07884  | -4.79009 |
| N  | 11.96055 | 8.87336  | 1.79641  |
| C  | 11.53871 | 8.53566  | 0.54945  |
| C  | 9.83182  | 7.07166  | -0.47564 |
| F  | 8.38094  | 6.85332  | -5.01289 |
| C  | 8.81293  | 6.11039  | -0.07401 |
| C  | 8.03852  | 5.46503  | -1.05643 |
| C  | 8.26746  | 5.77891  | -2.42535 |
| H  | 7.66626  | 5.29283  | -3.19421 |
| C  | 13.56754 | 10.30307 | 0.76079  |

|   |          |          |          |
|---|----------|----------|----------|
| H | 14.38802 | 11.01745 | 0.84224  |
| C | 7.71525  | 4.98329  | 1.66896  |
| H | 7.61731  | 4.83030  | 2.74730  |
| C | 10.02429 | 7.34497  | -1.84413 |
| H | 10.78449 | 8.06713  | -2.12969 |
| C | 9.23928  | 6.69751  | -2.81137 |
| C | 13.06547 | 9.89392  | -0.47890 |
| H | 13.48835 | 10.28472 | -1.41170 |
| C | 6.88956  | 4.27257  | 0.78543  |
| C | 7.02116  | 4.48928  | -0.63767 |
| C | 12.95717 | 9.74295  | 1.89277  |
| H | 13.28893 | 10.00999 | 2.90268  |
| C | 5.24662  | 2.85706  | -1.04473 |
| H | 4.61529  | 2.31296  | -1.75079 |
| C | 5.91055  | 3.33053  | 1.24430  |
| H | 5.80553  | 3.16377  | 2.31996  |
| C | 9.49937  | 6.95706  | -4.26891 |
| C | 5.11325  | 2.64440  | 0.34255  |
| H | 4.37184  | 1.92933  | 0.71192  |
| C | 6.19857  | 3.77676  | -1.51728 |
| H | 6.28824  | 3.92866  | -2.59487 |

(CF<sup>3</sup>L2)<sub>2</sub>Zn (T<sub>1,eq</sub>) B3LYP (SMD “diethyl ether”/ def2-tzvpp def2/j)

|    |          |          |         |
|----|----------|----------|---------|
| Zn | 9.91927  | 6.95589  | 2.43376 |
| N  | 9.51769  | 7.61022  | 4.27044 |
| N  | 11.23945 | 5.71426  | 3.54497 |
| F  | 9.40008  | 6.66864  | 9.45739 |
| N  | 8.20682  | 9.20202  | 5.47074 |
| F  | 11.46595 | 6.16800  | 9.86733 |
| N  | 8.14365  | 8.97390  | 3.08999 |
| C  | 8.60702  | 8.61672  | 4.32254 |
| C  | 10.20077 | 7.00898  | 5.29573 |
| F  | 10.92648 | 8.19099  | 9.31670 |
| C  | 11.13992 | 5.97801  | 4.89543 |
| C  | 11.91907 | 5.27011  | 5.84878 |
| C  | 11.76386 | 5.57785  | 7.22050 |
| H  | 12.34084 | 5.05005  | 7.97733 |
| C  | 6.77874  | 10.61707 | 4.16245 |
| H  | 6.04404  | 11.42134 | 4.10171 |
| C  | 12.05988 | 4.79943  | 3.09950 |
| H  | 12.09159 | 4.63279  | 2.01691 |
| C  | 10.08839 | 7.27706  | 6.66789 |
| H  | 9.39092  | 8.04542  | 6.99407 |
| C  | 10.86229 | 6.56068  | 7.59957 |
| C  | 7.30839  | 10.18428 | 5.37730 |
| H  | 6.99493  | 10.64998 | 6.32028 |
| C  | 12.90260 | 4.02385  | 3.95462 |
| C  | 12.84125 | 4.25596  | 5.36024 |
| C  | 7.25085  | 9.95124  | 3.02296 |
| H  | 6.88976  | 10.22340 | 2.02319 |
| C  | 14.53715 | 2.53440  | 5.66127 |
| H  | 15.17877 | 1.95092  | 6.32713 |
| C  | 13.78160 | 3.04650  | 3.42364 |
| H  | 13.80757 | 2.88863  | 2.34189 |
| C  | 10.67008 | 6.89180  | 9.05849 |
| C  | 14.59085 | 2.30877  | 4.26761 |
| H  | 15.27021 | 1.55445  | 3.86280 |
| C  | 13.68300 | 3.48500  | 6.19865 |
| H  | 13.66691 | 3.63514  | 7.27901 |
| N  | 10.53220 | 7.62313  | 0.59201 |

|   |          |          |          |
|---|----------|----------|----------|
| N | 8.67907  | 5.83741  | 1.24922  |
| F | 10.36083 | 8.01717  | -4.46845 |
| N | 12.05415 | 9.08656  | -0.52373 |
| F | 9.76436  | 5.99073  | -4.95523 |
| N | 11.98368 | 8.83032  | 1.85149  |
| C | 11.55071 | 8.54298  | 0.59943  |
| C | 9.85007  | 7.09301  | -0.44666 |
| F | 8.27050  | 7.54003  | -4.79344 |
| C | 8.82758  | 6.10282  | -0.05486 |
| C | 8.04026  | 5.46606  | -1.07261 |
| C | 8.26537  | 5.81215  | -2.40379 |
| H | 7.67496  | 5.34099  | -3.19161 |
| C | 13.55719 | 10.32876 | 0.86377  |
| H | 14.36807 | 11.05153 | 0.96713  |
| C | 7.73805  | 4.92015  | 1.66454  |
| H | 7.66420  | 4.75421  | 2.74171  |
| C | 10.02708 | 7.39968  | -1.82819 |
| H | 10.78192 | 8.13296  | -2.10001 |
| C | 9.25267  | 6.77578  | -2.78228 |
| C | 13.04424 | 9.96764  | -0.38425 |
| H | 13.44746 | 10.40548 | -1.30507 |
| C | 6.90948  | 4.22914  | 0.76723  |
| C | 7.03398  | 4.47995  | -0.64763 |
| C | 12.97008 | 9.70935  | 1.97556  |
| H | 13.31062 | 9.93464  | 2.99297  |
| C | 5.26010  | 2.85597  | -1.07509 |
| H | 4.62321  | 2.32605  | -1.78769 |
| C | 5.93906  | 3.27785  | 1.21408  |
| H | 5.84482  | 3.08935  | 2.28740  |
| C | 9.41875  | 7.08633  | -4.23842 |
| C | 5.13494  | 2.60902  | 0.30981  |
| H | 4.39761  | 1.88484  | 0.66830  |
| C | 6.20014  | 3.78105  | -1.53538 |
| H | 6.27904  | 3.95623  | -2.61047 |

(CF<sup>3</sup>L2)<sub>2</sub>Zn (S<sub>0,eq</sub>) B3LYP (SMD “toluene”/ def2-tzvpp def2/j)

|    |          |          |         |
|----|----------|----------|---------|
| Zn | 10.03697 | 7.20854  | 2.38887 |
| N  | 9.50926  | 7.68682  | 4.24815 |
| N  | 11.32077 | 5.89326  | 3.48950 |
| F  | 9.17078  | 6.43353  | 9.35976 |
| N  | 8.05817  | 9.12477  | 5.48141 |
| F  | 11.22140 | 5.92161  | 9.82871 |
| N  | 8.14745  | 9.07952  | 3.09130 |
| C  | 8.55307  | 8.64887  | 4.32034 |
| C  | 10.15454 | 7.03275  | 5.26513 |
| F  | 10.68833 | 7.97089  | 9.37742 |
| C  | 11.14150 | 6.05553  | 4.84652 |
| C  | 11.88896 | 5.30098  | 5.79004 |
| C  | 11.65818 | 5.51325  | 7.16868 |
| H  | 12.21289 | 4.95316  | 7.91881 |
| C  | 6.65228  | 10.58124 | 4.19546 |
| H  | 5.88962  | 11.35993 | 4.14919 |
| C  | 12.19340 | 5.03883  | 3.02645 |
| H  | 12.29290 | 4.95979  | 1.93778 |
| C  | 9.96587  | 7.20458  | 6.64448 |
| H  | 9.23205  | 7.93259  | 6.98350 |
| C  | 10.71393 | 6.44843  | 7.56518 |
| C  | 7.12523  | 10.07488 | 5.40551 |
| H  | 6.73481  | 10.45149 | 6.35947 |
| C  | 13.00818 | 4.22007  | 3.86924 |

|   |          |          |          |
|---|----------|----------|----------|
| C | 12.86017 | 4.34377  | 5.28220  |
| C | 7.22010  | 10.02416 | 3.04101  |
| H | 6.90904  | 10.35809 | 2.04322  |
| C | 14.57585 | 2.63636  | 5.55442  |
| H | 15.19027 | 2.01541  | 6.21185  |
| C | 13.94109 | 3.30445  | 3.32096  |
| H | 14.03496 | 3.23040  | 2.23400  |
| C | 10.45391 | 6.68890  | 9.03203  |
| C | 14.71733 | 2.52024  | 4.15372  |
| H | 15.43766 | 1.81331  | 3.73469  |
| C | 13.66951 | 3.52651  | 6.10876  |
| H | 13.58475 | 3.59240  | 7.19429  |
| N | 10.58873 | 7.67372  | 0.53366  |
| N | 8.68467  | 5.97227  | 1.27712  |
| F | 10.85631 | 6.52309  | -4.58794 |
| N | 12.12490 | 9.03220  | -0.68660 |
| F | 8.80085  | 6.03453  | -5.06112 |
| N | 12.02290 | 8.98055  | 1.70294  |
| C | 11.59832 | 8.58021  | 0.47005  |
| C | 9.90738  | 7.06672  | -0.48886 |
| F | 9.35369  | 8.07509  | -4.59489 |
| C | 8.86897  | 6.14067  | -0.07849 |
| C | 8.07853  | 5.43987  | -1.02844 |
| C | 8.31773  | 5.65494  | -2.40518 |
| H | 7.73125  | 5.13535  | -3.16029 |
| C | 13.60923 | 10.39623 | 0.61259  |
| H | 14.41644 | 11.12815 | 0.66592  |
| C | 7.76749  | 5.16171  | 1.73287  |
| H | 7.66689  | 5.07496  | 2.82086  |
| C | 10.10329 | 7.24280  | -1.86666 |
| H | 10.87689 | 7.93148  | -2.19941 |
| C | 9.31231  | 6.54009  | -2.79373 |
| C | 13.11201 | 9.92513  | -0.60195 |
| H | 13.52787 | 10.28306 | -1.55234 |
| C | 6.90615  | 4.39973  | 0.88313  |
| C | 7.05677  | 4.53227  | -0.52877 |
| C | 13.00430 | 9.86835  | 1.76188  |
| H | 13.32995 | 10.17872 | 2.76263  |
| C | 5.24708  | 2.92742  | -0.81547 |
| H | 4.59665  | 2.35028  | -1.47817 |
| C | 5.92504  | 3.53111  | 1.42363  |
| H | 5.83038  | 3.44902  | 2.50994  |
| C | 9.57593  | 6.78818  | -4.25869 |
| C | 5.10341  | 2.80218  | 0.58421  |
| H | 4.34558  | 2.13185  | 0.99719  |
| C | 6.20057  | 3.77181  | -1.36226 |
| H | 6.28589  | 3.84581  | -2.44717 |

(CF<sup>3</sup>L2)<sub>2</sub>Zn (S<sub>1,eq</sub>) B3LYP (SMD “toluene”/ def2-tzvpp def2/j)

|    |          |         |         |
|----|----------|---------|---------|
| Zn | 9.85534  | 7.03100 | 2.43066 |
| N  | 9.53834  | 7.70590 | 4.27227 |
| N  | 11.20972 | 5.77727 | 3.51728 |
| F  | 9.39949  | 6.66173 | 9.43595 |
| N  | 8.31197  | 9.34566 | 5.49539 |
| F  | 11.46152 | 6.14145 | 9.84158 |
| N  | 8.19833  | 9.12150 | 3.11322 |
| C  | 8.66798  | 8.74666 | 4.33897 |
| C  | 10.21270 | 7.07802 | 5.28629 |
| F  | 10.93509 | 8.17871 | 9.32832 |
| C  | 11.12623 | 6.03075 | 4.86995 |

|   |          |          |          |
|---|----------|----------|----------|
| C | 11.89479 | 5.29529  | 5.81169  |
| C | 11.74709 | 5.58615  | 7.18741  |
| H | 12.31170 | 5.03488  | 7.93670  |
| C | 6.91381  | 10.81343 | 4.21110  |
| H | 6.20781  | 11.64369 | 4.16366  |
| C | 12.00716 | 4.84985  | 3.05783  |
| H | 12.02267 | 4.68874  | 1.97376  |
| C | 10.10916 | 7.32992  | 6.66218  |
| H | 9.43041  | 8.10971  | 6.99951  |
| C | 10.86538 | 6.58150  | 7.58205  |
| C | 7.44958  | 10.36055 | 5.41647  |
| H | 7.17119  | 10.83717 | 6.36503  |
| C | 12.84358 | 4.05139  | 3.89843  |
| C | 12.79558 | 4.27054  | 5.30640  |
| C | 7.34074  | 10.13093 | 3.06341  |
| H | 6.97200  | 10.41638 | 2.07012  |
| C | 14.46372 | 2.51616  | 5.57899  |
| H | 15.09957 | 1.91494  | 6.23435  |
| C | 13.70149 | 3.06399  | 3.35194  |
| H | 13.71629 | 2.91621  | 2.26855  |
| C | 10.67140 | 6.88672  | 9.04677  |
| C | 14.50397 | 2.30355  | 4.18236  |
| H | 15.16681 | 1.54153  | 3.76509  |
| C | 13.62936 | 3.47609  | 6.13110  |
| H | 13.62200 | 3.61666  | 7.21277  |
| N | 10.49707 | 7.65371  | 0.56868  |
| N | 8.65498  | 5.89604  | 1.27937  |
| F | 9.35375  | 8.18405  | -4.57337 |
| N | 11.96337 | 9.12884  | -0.59505 |
| F | 10.86357 | 6.63969  | -4.58946 |
| N | 11.91756 | 8.92740  | 1.79309  |
| C | 11.48317 | 8.59450  | 0.54802  |
| C | 9.83750  | 7.06238  | -0.47750 |
| F | 8.81108  | 6.14823  | -5.08533 |
| C | 8.82704  | 6.09524  | -0.07164 |
| C | 8.08481  | 5.41435  | -1.04747 |
| C | 8.34391  | 5.68839  | -2.42524 |
| H | 7.77480  | 5.16368  | -3.19163 |
| C | 13.42452 | 10.45958 | 0.75446  |
| H | 14.20713 | 11.21542 | 0.83410  |
| C | 7.71143  | 4.99694  | 1.67602  |
| H | 7.59412  | 4.86574  | 2.75549  |
| C | 10.05663 | 7.30049  | -1.84430 |
| H | 10.81375 | 8.02591  | -2.13395 |
| C | 9.30451  | 6.60571  | -2.81436 |
| C | 12.91859 | 10.04761 | -0.48318 |
| H | 13.30078 | 10.47754 | -1.41648 |
| C | 6.90873  | 4.25784  | 0.79520  |
| C | 7.06755  | 4.43999  | -0.62947 |
| C | 12.86967 | 9.84385  | 1.88671  |
| H | 13.21078 | 10.10490 | 2.89522  |
| C | 5.31264  | 2.78632  | -1.03184 |
| H | 4.69890  | 2.22130  | -1.73672 |
| C | 5.92762  | 3.31966  | 1.25749  |
| H | 5.80120  | 3.17824  | 2.33433  |
| C | 9.57620  | 6.88838  | -4.26491 |
| C | 5.15368  | 2.60646  | 0.35648  |
| H | 4.40977  | 1.89540  | 0.72832  |
| C | 6.26805  | 3.70164  | -1.50774 |
| H | 6.37668  | 3.82878  | -2.58665 |

(CF<sub>3</sub>L2)<sub>2</sub>Zn (T<sub>1,eq</sub>) B3LYP (SMD “toluene”/ def2-tzvpp def2/j)

|    |          |          |          |
|----|----------|----------|----------|
| Zn | 9.90509  | 6.97019  | 2.43600  |
| N  | 9.51375  | 7.61289  | 4.27648  |
| N  | 11.22865 | 5.71479  | 3.54488  |
| F  | 9.41852  | 6.68518  | 9.46498  |
| N  | 8.20833  | 9.20833  | 5.47728  |
| F  | 11.48342 | 6.17121  | 9.86385  |
| N  | 8.14445  | 8.97892  | 3.09689  |
| C  | 8.60645  | 8.62195  | 4.32969  |
| C  | 10.19961 | 7.01231  | 5.29867  |
| F  | 10.95391 | 8.19731  | 9.31444  |
| C  | 11.13495 | 5.97937  | 4.89517  |
| C  | 11.91635 | 5.27023  | 5.84648  |
| C  | 11.76742 | 5.58054  | 7.21780  |
| H  | 12.34558 | 5.05352  | 7.97414  |
| C  | 6.78267  | 10.62432 | 4.16823  |
| H  | 6.04921  | 11.42960 | 4.10721  |
| C  | 12.04447 | 4.79771  | 3.09701  |
| H  | 12.07095 | 4.63084  | 2.01419  |
| C  | 10.09346 | 7.28278  | 6.67109  |
| H  | 9.39854  | 8.05329  | 6.99815  |
| C  | 10.86974 | 6.56635  | 7.59982  |
| C  | 7.31222  | 10.19155 | 5.38350  |
| H  | 7.00037  | 10.65813 | 6.32655  |
| C  | 12.88852 | 4.01951  | 3.94891  |
| C  | 12.83316 | 4.25305  | 5.35456  |
| C  | 7.25352  | 9.95702  | 3.02893  |
| H  | 6.89334  | 10.22848 | 2.02869  |
| C  | 14.52455 | 2.52553  | 5.65088  |
| H  | 15.16632 | 1.94037  | 6.31496  |
| C  | 13.76245 | 3.03861  | 3.41630  |
| H  | 13.78423 | 2.87905  | 2.33471  |
| C  | 10.68678 | 6.90052  | 9.06012  |
| C  | 14.57236 | 2.29868  | 4.25737  |
| H  | 15.24735 | 1.54174  | 3.85042  |
| C  | 13.67568 | 3.47943  | 6.18990  |
| H  | 13.66332 | 3.63069  | 7.27004  |
| N  | 10.53061 | 7.62435  | 0.59376  |
| N  | 8.67637  | 5.83960  | 1.24911  |
| F  | 10.37347 | 8.00762  | -4.46904 |
| N  | 12.05209 | 9.08998  | -0.51929 |
| F  | 9.77483  | 5.98079  | -4.95294 |
| N  | 11.97658 | 8.83457  | 1.85571  |
| C  | 11.54676 | 8.54548  | 0.60286  |
| C  | 9.85227  | 7.09192  | -0.44592 |
| F  | 8.28261  | 7.53180  | -4.79411 |
| C  | 8.82930  | 6.10141  | -0.05480 |
| C  | 8.04646  | 5.46053  | -1.07368 |
| C  | 8.27592  | 5.80489  | -2.40433 |
| H  | 7.68899  | 5.33184  | -3.19344 |
| C  | 13.54586 | 10.33928 | 0.87147  |
| H  | 14.35311 | 11.06578 | 0.97657  |
| C  | 7.73471  | 4.92281  | 1.66334  |
| H  | 7.65595  | 4.76158  | 2.74078  |
| C  | 10.03341 | 7.39644  | -1.82798 |
| H  | 10.78793 | 8.13048  | -2.09902 |
| C  | 9.26298  | 6.76976  | -2.78254 |
| C  | 13.03780 | 9.97451  | -0.37764 |
| H  | 13.44159 | 10.41248 | -1.29825 |
| C  | 6.91084  | 4.22754  | 0.76540  |
| C  | 7.04084  | 4.47390  | -0.64962 |

|   |          |         |          |
|---|----------|---------|----------|
| C | 12.95823 | 9.71721 | 1.98201  |
| H | 13.29465 | 9.94333 | 3.00067  |
| C | 5.27173  | 2.84557 | -1.07862 |
| H | 4.63878  | 2.31211 | -1.79188 |
| C | 5.94009  | 3.27652 | 1.21129  |
| H | 5.84141  | 3.09185 | 2.28475  |
| C | 9.43047  | 7.07830 | -4.23962 |
| C | 5.14103  | 2.60339 | 0.30642  |
| H | 4.40329  | 1.87952 | 0.66429  |
| C | 6.21179  | 3.77026 | -1.53800 |
| H | 6.29463  | 3.94165 | -2.61334 |

(CF<sup>3</sup>L2)<sub>2</sub>Zn (S<sub>0,eq</sub>) B3LYP (SMD “n-hexane”/ def2-tzvpp def2/j)

|    |          |          |          |
|----|----------|----------|----------|
| Zn | 10.03812 | 7.22508  | 2.38901  |
| N  | 9.50518  | 7.68600  | 4.25022  |
| N  | 11.32249 | 5.90089  | 3.48807  |
| F  | 9.16038  | 6.41772  | 9.35686  |
| N  | 8.04748  | 9.11634  | 5.48431  |
| F  | 11.21030 | 5.90278  | 9.82632  |
| N  | 8.14749  | 9.08204  | 3.09409  |
| C  | 8.54782  | 8.64672  | 4.32322  |
| C  | 10.14964 | 7.02991  | 5.26575  |
| F  | 10.67875 | 7.95420  | 9.38233  |
| C  | 11.13978 | 6.05693  | 4.84521  |
| C  | 11.88721 | 5.30050  | 5.78761  |
| C  | 11.65305 | 5.50743  | 7.16627  |
| H  | 12.20731 | 4.94657  | 7.91611  |
| C  | 6.64634  | 10.57741 | 4.19834  |
| H  | 5.88336  | 11.35576 | 4.15226  |
| C  | 12.19844 | 5.05093  | 3.02364  |
| H  | 12.30083 | 4.97750  | 1.93474  |
| C  | 9.95747  | 7.19627  | 6.64539  |
| H  | 9.22088  | 7.92138  | 6.98479  |
| C  | 10.70568 | 6.43897  | 7.56464  |
| C  | 7.11433  | 10.06579 | 5.40832  |
| H  | 6.71940  | 10.43753 | 6.36236  |
| C  | 13.01332 | 4.23019  | 3.86470  |
| C  | 12.86154 | 4.34764  | 5.27781  |
| C  | 7.21978  | 10.02597 | 3.04385  |
| H  | 6.91320  | 10.36385 | 2.04597  |
| C  | 14.58042 | 2.64256  | 5.54718  |
| H  | 15.19448 | 2.02018  | 6.20356  |
| C  | 13.94969 | 3.31884  | 3.31527  |
| H  | 14.04672 | 3.24936  | 2.22827  |
| C  | 10.44362 | 6.67408  | 9.03249  |
| C  | 14.72564 | 2.53270  | 4.14639  |
| H  | 15.44848 | 1.82917  | 3.72604  |
| C  | 13.67079 | 3.52846  | 6.10265  |
| H  | 13.58287 | 3.58984  | 7.18814  |
| N  | 10.59180 | 7.67527  | 0.53127  |
| N  | 8.68436  | 5.98050  | 1.27924  |
| F  | 10.86242 | 6.50889  | -4.58546 |
| N  | 12.13190 | 9.02657  | -0.69175 |
| F  | 8.80726  | 6.01793  | -5.05838 |
| N  | 12.02692 | 8.98210  | 1.69808  |
| C  | 11.60326 | 8.57941  | 0.46566  |
| C  | 9.91054  | 7.06603  | -0.48945 |
| F  | 9.35936  | 8.06049  | -4.59957 |
| C  | 8.87031  | 6.14330  | -0.07664 |
| C  | 8.07960  | 5.44025  | -1.02506 |

|   |          |          |          |
|---|----------|----------|----------|
| C | 8.32081  | 5.65017  | -2.40204 |
| H | 7.73486  | 5.12910  | -3.15651 |
| C | 13.61690 | 10.39169 | 0.60555  |
| H | 14.42527 | 11.12239 | 0.65766  |
| C | 7.76509  | 5.17375  | 1.73698  |
| H | 7.66302  | 5.09219  | 2.82533  |
| C | 10.10827 | 7.23705  | -1.86773 |
| H | 10.88359 | 7.92342  | -2.20137 |
| C | 9.31719  | 6.53250  | -2.79297 |
| C | 13.12030 | 9.91769  | -0.60833 |
| H | 13.53790 | 10.27179 | -1.55943 |
| C | 6.90319  | 4.40968  | 0.88941  |
| C | 7.05591  | 4.53640  | -0.52281 |
| C | 13.00958 | 9.86820  | 1.75569  |
| H | 13.33422 | 10.18065 | 2.75614  |
| C | 5.24358  | 2.93337  | -0.80561 |
| H | 4.59302  | 2.35480  | -1.46690 |
| C | 5.91974  | 3.54486  | 1.43169  |
| H | 5.82322  | 3.46707  | 2.51817  |
| C | 9.58208  | 6.77536  | -4.25904 |
| C | 5.09786  | 2.81394  | 0.59435  |
| H | 4.33837  | 2.14665  | 1.00913  |
| C | 6.19924  | 3.77398  | -1.35412 |
| H | 6.28631  | 3.84394  | -2.43912 |

(<sup>CF</sup><sub>3</sub>L2)<sub>2</sub>Zn (S<sub>1,eq</sub>) B3LYP (SMD “n-hexane”/ def2-tzvpp def2/j)

|    |          |          |         |
|----|----------|----------|---------|
| Zn | 9.84578  | 7.03326  | 2.43278 |
| N  | 9.53508  | 7.70692  | 4.27610 |
| N  | 11.20325 | 5.77709  | 3.51953 |
| F  | 9.41674  | 6.68962  | 9.44324 |
| N  | 8.31305  | 9.34889  | 5.49989 |
| F  | 11.47632 | 6.15309  | 9.84115 |
| N  | 8.19379  | 9.12137  | 3.11821 |
| C  | 8.66581  | 8.74831  | 4.34345 |
| C  | 10.21287 | 7.08172  | 5.28875 |
| F  | 10.96444 | 8.19310  | 9.32410 |
| C  | 11.12392 | 6.03277  | 4.87175 |
| C  | 11.89415 | 5.29771  | 5.81285 |
| C  | 11.75222 | 5.59305  | 7.18796 |
| H  | 12.31816 | 5.04331  | 7.93736 |
| C  | 6.91226  | 10.81480 | 4.21675 |
| H  | 6.20617  | 11.64499 | 4.16984 |
| C  | 11.99628 | 4.84643  | 3.05957 |
| H  | 12.00825 | 4.68403  | 1.97556 |
| C  | 10.11505 | 7.33781  | 6.66447 |
| H  | 9.43817  | 8.11943  | 7.00156 |
| C  | 10.87383 | 6.59141  | 7.58335 |
| C  | 7.45096  | 10.36347 | 5.42157 |
| H  | 7.17513  | 10.84124 | 6.37034 |
| C  | 12.83258 | 4.04646  | 3.89895 |
| C  | 12.78987 | 4.26909  | 5.30658 |
| C  | 7.33639  | 10.13061 | 3.06905 |
| H  | 6.96550  | 10.41441 | 2.07605 |
| C  | 14.45277 | 2.50916  | 5.57775 |
| H  | 15.08843 | 1.90708  | 6.23247 |
| C  | 13.68527 | 3.05469  | 3.35235 |
| H  | 13.69624 | 2.90391  | 2.26929 |
| C  | 10.68826 | 6.90293  | 9.04837 |
| C  | 14.48774 | 2.29323  | 4.18159 |
| H  | 15.14629 | 1.52782  | 3.76377 |

|   |          |          |          |
|---|----------|----------|----------|
| C | 13.62369 | 3.47331  | 6.13000  |
| H | 13.62000 | 3.61632  | 7.21134  |
| N | 10.49316 | 7.65591  | 0.57149  |
| N | 8.65836  | 5.89007  | 1.27894  |
| F | 9.35081  | 8.19438  | -4.56980 |
| N | 11.96341 | 9.12714  | -0.59138 |
| F | 10.86150 | 6.65082  | -4.58906 |
| N | 11.90780 | 8.93346  | 1.79782  |
| C | 11.47731 | 8.59623  | 0.55177  |
| C | 9.83459  | 7.06403  | -0.47816 |
| F | 8.80961  | 6.15970  | -5.08841 |
| C | 8.82854  | 6.09324  | -0.07469 |
| C | 8.08888  | 5.41287  | -1.04977 |
| C | 8.34634  | 5.69115  | -2.42946 |
| H | 7.77873  | 5.16566  | -3.19627 |
| C | 13.41858 | 10.46235 | 0.76009  |
| H | 14.20086 | 11.21845 | 0.84049  |
| C | 7.71841  | 4.98644  | 1.67024  |
| H | 7.60065  | 4.85050  | 2.74924  |
| C | 10.05230 | 7.30701  | -1.84266 |
| H | 10.80664 | 8.03588  | -2.13075 |
| C | 9.30158  | 6.61143  | -2.81606 |
| C | 12.91785 | 10.04567 | -0.47835 |
| H | 13.30428 | 10.47180 | -1.41177 |
| C | 6.91801  | 4.24674  | 0.78812  |
| C | 7.07522  | 4.43389  | -0.63588 |
| C | 12.85871 | 9.84999  | 1.89212  |
| H | 13.19538 | 10.11402 | 2.90144  |
| C | 5.32576  | 2.77595  | -1.04207 |
| H | 4.71319  | 2.21138  | -1.74822 |
| C | 5.94064  | 3.30356  | 1.24840  |
| H | 5.81532  | 3.15801  | 2.32476  |
| C | 9.57391  | 6.89824  | -4.26600 |
| C | 5.16870  | 2.59092  | 0.34549  |
| H | 4.42752  | 1.87607  | 0.71541  |
| C | 6.27778  | 3.69613  | -1.51595 |
| H | 6.38448  | 3.82697  | -2.59453 |

(CF<sup>3</sup>L2)<sub>2</sub>Zn (T<sub>1,eq</sub>) B3LYP (SMD “n-hexane”/ def2-tzvpp def2/j)

|    |          |          |         |
|----|----------|----------|---------|
| Zn | 9.89596  | 6.97516  | 2.43754 |
| N  | 9.51058  | 7.61299  | 4.27966 |
| N  | 11.22170 | 5.71312  | 3.54551 |
| F  | 9.43392  | 6.70291  | 9.47054 |
| N  | 8.20972  | 9.21154  | 5.48089 |
| F  | 11.49798 | 6.17922  | 9.86194 |
| N  | 8.14257  | 8.97970  | 3.10055 |
| C  | 8.60528  | 8.62372  | 4.33336 |
| C  | 10.19928 | 7.01423  | 5.30032 |
| F  | 10.97633 | 8.20690  | 9.31019 |
| C  | 11.13227 | 5.97979  | 4.89550 |
| C  | 11.91581 | 5.27121  | 5.84586 |
| C  | 11.77187 | 5.58486  | 7.21671 |
| H  | 12.35160 | 5.05933  | 7.97282 |
| C  | 6.78399  | 10.62751 | 4.17192 |
| H  | 6.05131  | 11.43345 | 4.11102 |
| C  | 12.03464 | 4.79413  | 3.09686 |
| H  | 12.05759 | 4.62586  | 2.01407 |
| C  | 10.09804 | 7.28785  | 6.67260 |
| H  | 9.40478  | 8.05986  | 6.99978 |
| C  | 10.87680 | 6.57287  | 7.59998 |

|   |          |          |          |
|---|----------|----------|----------|
| C | 7.31486  | 10.19542 | 5.38708  |
| H | 7.00500  | 10.66321 | 6.33021  |
| C | 12.87992 | 4.01541  | 3.94733  |
| C | 12.82904 | 4.25155  | 5.35270  |
| C | 7.25273  | 9.95847  | 3.03267  |
| H | 6.89185  | 10.22895 | 2.03240  |
| C | 14.51784 | 2.52075  | 5.64729  |
| H | 15.16011 | 1.93535  | 6.31063  |
| C | 13.75043 | 3.03172  | 3.41428  |
| H | 13.76895 | 2.86995  | 2.33294  |
| C | 10.70111 | 6.91133  | 9.06071  |
| C | 14.56126 | 2.29145  | 4.25404  |
| H | 15.23338 | 1.53241  | 3.84634  |
| C | 13.67249 | 3.47736  | 6.18670  |
| H | 13.66307 | 3.63059  | 7.26656  |
| N | 10.52872 | 7.62404  | 0.59586  |
| N | 8.67370  | 5.83902  | 1.24844  |
| F | 10.37964 | 8.00617  | -4.46796 |
| N | 12.04998 | 9.09112  | -0.51529 |
| F | 9.78051  | 5.97924  | -4.95200 |
| N | 11.97265 | 8.83479  | 1.85984  |
| C | 11.54398 | 8.54570  | 0.60642  |
| C | 9.85246  | 7.09124  | -0.44492 |
| F | 8.28861  | 7.53071  | -4.79387 |
| C | 8.82925  | 6.10015  | -0.05520 |
| C | 8.04907  | 5.45788  | -1.07538 |
| C | 8.28096  | 5.80251  | -2.40544 |
| H | 7.69600  | 5.32903  | -3.19568 |
| C | 13.54012 | 10.34272 | 0.87744  |
| H | 14.34588 | 11.07072 | 0.98354  |
| C | 7.73164  | 4.92183  | 1.66090  |
| H | 7.65003  | 4.76186  | 2.73829  |
| C | 10.03591 | 7.39579  | -1.82704 |
| H | 10.79025 | 8.13046  | -2.09691 |
| C | 9.26779  | 6.76846  | -2.78256 |
| C | 13.03387 | 9.97698  | -0.37223 |
| H | 13.43778 | 10.41543 | -1.29265 |
| C | 6.91063  | 4.22499  | 0.76177  |
| C | 7.04388  | 4.47036  | -0.65304 |
| C | 12.95233 | 9.71888  | 1.98719  |
| H | 13.28716 | 9.94475  | 3.00650  |
| C | 5.27777  | 2.83967  | -1.08495 |
| H | 4.64727  | 2.30484  | -1.79927 |
| C | 5.93978  | 3.27346  | 1.20601  |
| H | 5.83852  | 3.08974  | 2.27937  |
| C | 9.43634  | 7.07721  | -4.23992 |
| C | 5.14377  | 2.59867  | 0.29996  |
| H | 4.40589  | 1.87443  | 0.65660  |
| C | 6.21781  | 3.76485  | -1.54268 |
| H | 6.30305  | 3.93525  | -2.61799 |

(<sup>18</sup>BuL3)<sub>2</sub>Zn (S<sub>0,eq</sub>) M06-L (gas phase/ def2-tzvpp def2/j)

|    |          |          |          |
|----|----------|----------|----------|
| Zn | 0.00000  | 0.00000  | 0.27705  |
| N  | -1.07684 | -1.40509 | -0.81680 |
| N  | 0.95159  | -1.60696 | 0.93135  |
| C  | 0.44037  | -2.78204 | 0.43793  |
| C  | -0.65593 | -2.67970 | -0.49748 |
| C  | -0.80653 | -5.11190 | -0.65277 |
| H  | -1.27077 | -5.99525 | -1.07048 |
| C  | 0.83400  | -4.08116 | 0.80546  |

|   |          |          |          |
|---|----------|----------|----------|
| H | 1.62347  | -4.18701 | 1.54100  |
| C | -1.27244 | -3.83671 | -1.04291 |
| C | -2.76616 | -2.29840 | -2.28018 |
| C | -2.07425 | -1.21940 | -1.65364 |
| C | 0.23057  | -5.23950 | 0.27425  |
| C | -2.36720 | -3.63439 | -1.97827 |
| C | 2.15279  | -1.54395 | 1.65546  |
| C | -3.06870 | -4.69118 | -2.60759 |
| H | -2.79637 | -5.72088 | -2.40463 |
| C | 3.31013  | -2.28212 | 1.31520  |
| H | 3.28064  | -2.96470 | 0.47130  |
| C | 0.73583  | -6.61477 | 0.74728  |
| C | -3.83209 | -2.05043 | -3.18115 |
| H | -4.11673 | -1.02282 | -3.39014 |
| C | -4.49740 | -3.10423 | -3.78038 |
| H | -5.31417 | -2.91761 | -4.47035 |
| C | -4.10805 | -4.43049 | -3.48794 |
| H | -4.63014 | -5.25842 | -3.95825 |
| C | 2.25122  | -0.63064 | 2.72843  |
| H | 1.37472  | -0.04522 | 2.99594  |
| C | 4.49951  | -2.12030 | 2.03010  |
| H | 5.37446  | -2.69650 | 1.73952  |
| C | 4.57932  | -1.21789 | 3.09865  |
| H | 5.50637  | -1.09607 | 3.65079  |
| C | 3.44478  | -0.46912 | 3.43542  |
| H | 3.48490  | 0.24175  | 4.25663  |
| N | 1.07684  | 1.40509  | -0.81680 |
| N | -0.95159 | 1.60696  | 0.93135  |
| C | -0.44037 | 2.78204  | 0.43793  |
| C | 0.65593  | 2.67970  | -0.49748 |
| C | 0.80653  | 5.11190  | -0.65277 |
| H | 1.27077  | 5.99525  | -1.07048 |
| C | -0.83400 | 4.08116  | 0.80546  |
| H | -1.62347 | 4.18701  | 1.54100  |
| C | 1.27244  | 3.83671  | -1.04291 |
| C | 2.76616  | 2.29840  | -2.28018 |
| C | 2.07425  | 1.21940  | -1.65364 |
| C | -0.23057 | 5.23950  | 0.27425  |
| C | 2.36720  | 3.63439  | -1.97827 |
| C | -2.15279 | 1.54395  | 1.65546  |
| C | 3.06870  | 4.69118  | -2.60759 |
| H | 2.79637  | 5.72088  | -2.40463 |
| C | -3.31013 | 2.28212  | 1.31520  |
| H | -3.28064 | 2.96470  | 0.47130  |
| C | -0.73583 | 6.61477  | 0.74728  |
| C | 3.83209  | 2.05043  | -3.18115 |
| H | 4.11673  | 1.02282  | -3.39014 |
| C | 4.49740  | 3.10423  | -3.78038 |
| H | 5.31417  | 2.91761  | -4.47035 |
| C | 4.10805  | 4.43049  | -3.48794 |
| H | 4.63014  | 5.25842  | -3.95825 |
| C | -2.25122 | 0.63064  | 2.72843  |
| H | -1.37472 | 0.04522  | 2.99594  |
| C | -4.49951 | 2.12030  | 2.03010  |
| H | -5.37446 | 2.69650  | 1.73952  |
| C | -4.57932 | 1.21789  | 3.09865  |
| H | -5.50637 | 1.09607  | 3.65079  |
| C | -3.44478 | 0.46912  | 3.43542  |
| H | -3.48490 | -0.24175 | 4.25663  |
| H | -2.36605 | -0.19253 | -1.85902 |
| H | 2.36605  | 0.19253  | -1.85902 |
| C | -0.52303 | 6.74064  | 2.27555  |

|   |          |          |          |
|---|----------|----------|----------|
| H | -0.88315 | 7.71567  | 2.62455  |
| H | -1.06504 | 5.96427  | 2.82460  |
| H | 0.53970  | 6.65693  | 2.52808  |
| C | -2.24482 | 6.74810  | 0.43150  |
| H | -2.83408 | 5.97540  | 0.93506  |
| H | -2.61228 | 7.72487  | 0.76755  |
| H | -2.42457 | 6.66637  | -0.64620 |
| C | 0.00000  | 7.78216  | 0.06307  |
| H | 1.07399  | 7.76886  | 0.27917  |
| H | -0.13630 | 7.76614  | -1.02412 |
| H | -0.40261 | 8.73037  | 0.43548  |
| C | 0.52303  | -6.74064 | 2.27555  |
| H | 0.88315  | -7.71567 | 2.62455  |
| H | 1.06504  | -5.96427 | 2.82460  |
| H | -0.53970 | -6.65693 | 2.52808  |
| C | 2.24482  | -6.74810 | 0.43150  |
| H | 2.83408  | -5.97540 | 0.93506  |
| H | 2.61228  | -7.72487 | 0.76755  |
| H | 2.42457  | -6.66637 | -0.64620 |
| C | 0.00000  | -7.78216 | 0.06307  |
| H | -1.07399 | -7.76886 | 0.27917  |
| H | 0.13630  | -7.76614 | -1.02412 |
| H | 0.40261  | -8.73037 | 0.43548  |

(<sup>t</sup>BuL3)<sub>2</sub>Zn (S<sub>0,eq</sub>) B3LYP (SMD “dichloromethane”/ def2-tzvpp def2/j)

|    |          |          |          |
|----|----------|----------|----------|
| Zn | 0.02117  | 0.05096  | -0.00948 |
| N  | -1.04985 | -1.40535 | -1.02766 |
| N  | 0.97936  | -1.51996 | 0.74987  |
| C  | 0.42598  | -2.71353 | 0.36219  |
| C  | -0.66424 | -2.65510 | -0.59233 |
| C  | -0.89887 | -5.08783 | -0.53499 |
| H  | -1.39857 | -5.98792 | -0.88321 |
| C  | 0.76415  | -3.99120 | 0.84571  |
| H  | 1.54724  | -4.06605 | 1.59841  |
| C  | -1.31081 | -3.83597 | -1.04656 |
| C  | -2.73083 | -2.36658 | -2.44862 |
| C  | -2.01946 | -1.25803 | -1.89507 |
| C  | 0.12011  | -5.17240 | 0.41646  |
| C  | -2.38124 | -3.68353 | -2.02354 |
| C  | 2.17534  | -1.38552 | 1.45905  |
| C  | -3.10113 | -4.77027 | -2.57996 |
| H  | -2.86377 | -5.79266 | -2.28293 |
| C  | 3.30897  | -2.21713 | 1.28053  |
| H  | 3.27037  | -3.04156 | 0.56676  |
| C  | 0.56213  | -6.52122 | 1.02680  |
| C  | -3.76673 | -2.16580 | -3.39633 |
| H  | -4.01280 | -1.14501 | -3.70176 |
| C  | -4.44973 | -3.24734 | -3.92097 |
| H  | -5.24823 | -3.09626 | -4.65177 |
| C  | -4.10974 | -4.55476 | -3.50668 |
| H  | -4.64977 | -5.40987 | -3.92238 |
| C  | 2.31004  | -0.29751 | 2.35669  |
| H  | 1.45557  | 0.36922  | 2.50563  |
| C  | 4.49561  | -1.97865 | 1.97937  |
| H  | 5.35277  | -2.63808 | 1.81072  |
| C  | 4.60407  | -0.90748 | 2.87418  |
| H  | 5.53463  | -0.72806 | 3.41916  |
| C  | 3.49933  | -0.06456 | 3.04881  |
| H  | 3.56026  | 0.78439  | 3.73664  |
| N  | 1.10653  | 1.49470  | -1.03112 |

|   |          |          |          |
|---|----------|----------|----------|
| N | -0.94582 | 1.63154  | 0.71789  |
| C | -0.38632 | 2.82009  | 0.32379  |
| C | 0.71624  | 2.74973  | -0.61559 |
| C | 0.95247  | 5.18276  | -0.58296 |
| H | 1.45780  | 6.07833  | -0.93468 |
| C | -0.72958 | 4.10342  | 0.78822  |
| H | -1.52241 | 4.18743  | 1.52969  |
| C | 1.36966  | 3.92482  | -1.07495 |
| C | 2.80691  | 2.43828  | -2.44085 |
| C | 2.08755  | 1.33670  | -1.88369 |
| C | -0.07864 | 5.27907  | 0.35420  |
| C | 2.45248  | 3.76035  | -2.03617 |
| C | -2.15129 | 1.50622  | 1.41255  |
| C | 3.17992  | 4.84014  | -2.59628 |
| H | 2.93885  | 5.86614  | -2.31506 |
| C | -3.28217 | 2.33557  | 1.20808  |
| H | -3.23360 | 3.15096  | 0.48459  |
| C | -0.52714 | 6.63509  | 0.94347  |
| C | 3.85521  | 2.22581  | -3.37221 |
| H | 4.10485  | 1.20135  | -3.66209 |
| C | 4.54560  | 3.30076  | -3.90072 |
| H | 5.35370  | 3.14064  | -4.61893 |
| C | 4.20062  | 4.61319  | -3.50689 |
| H | 4.74635  | 5.46307  | -3.92585 |
| C | -2.29833 | 0.42967  | 2.32194  |
| H | -1.44593 | -0.23496 | 2.49085  |
| C | -4.47830 | 2.10585  | 1.89356  |
| H | -5.33304 | 2.76297  | 1.70481  |
| C | -4.59913 | 1.04602  | 2.80025  |
| H | -5.53711 | 0.87342  | 3.33460  |
| C | -3.49698 | 0.20544  | 3.00068  |
| H | -3.56742 | -0.63474 | 3.69830  |
| H | -2.28496 | -0.23864 | -2.19477 |
| H | 2.35641  | 0.31371  | -2.16778 |
| C | -0.30302 | 6.62655  | 2.47400  |
| H | -0.61540 | 7.58954  | 2.91213  |
| H | -0.88079 | 5.83207  | 2.97152  |
| H | 0.76115  | 6.47418  | 2.71958  |
| C | -2.02918 | 6.85718  | 0.65013  |
| H | -2.65970 | 6.07641  | 1.10312  |
| H | -2.35887 | 7.82724  | 1.05880  |
| H | -2.22664 | 6.86414  | -0.43482 |
| C | 0.25612  | 7.82078  | 0.35115  |
| H | 1.33607  | 7.74849  | 0.55659  |
| H | 0.12082  | 7.90303  | -0.73925 |
| H | -0.10138 | 8.76168  | 0.79977  |
| C | 0.31629  | -6.49621 | 2.55382  |
| H | 0.62370  | -7.45385 | 3.00694  |
| H | 0.88583  | -5.69543 | 3.05074  |
| H | -0.75147 | -6.34279 | 2.78256  |
| C | 2.06844  | -6.74437 | 0.75721  |
| H | 2.69152  | -5.95785 | 1.21054  |
| H | 2.39345  | -7.70945 | 1.18114  |
| H | 2.28127  | -6.76294 | -0.32468 |
| C | -0.21106 | -7.71451 | 0.43646  |
| H | -1.29392 | -7.64172 | 0.62576  |
| H | -0.06018 | -7.80844 | -0.65094 |
| H | 0.14134  | -8.64991 | 0.90037  |

(<sup>t</sup>BuL3)<sub>2</sub>Zn (S<sub>1,eq</sub>) B3LYP (SMD “dichloromethane”/ def2-tzvp def2/j)

|    |          |          |          |
|----|----------|----------|----------|
| Zn | -0.24665 | 0.01131  | -0.17492 |
| N  | -1.11468 | -1.49119 | -1.14176 |
| N  | 0.85117  | -1.52353 | 0.67616  |
| C  | 0.34458  | -2.75276 | 0.31450  |
| C  | -0.70661 | -2.73068 | -0.67746 |
| C  | -0.81234 | -5.16426 | -0.52430 |
| H  | -1.26166 | -6.09105 | -0.87445 |
| C  | 0.70476  | -3.97793 | 0.90119  |
| H  | 1.42312  | -3.96741 | 1.72040  |
| C  | -1.25480 | -3.94110 | -1.12108 |
| C  | -2.67346 | -2.60471 | -2.65274 |
| C  | -2.08895 | -1.45814 | -2.09493 |
| C  | 0.13841  | -5.20808 | 0.49041  |
| C  | -2.27173 | -3.91289 | -2.18265 |
| C  | 2.06233  | -1.32364 | 1.29924  |
| C  | -2.85971 | -5.05161 | -2.74715 |
| H  | -2.56220 | -6.04519 | -2.40553 |
| C  | 3.18881  | -2.18460 | 1.16269  |
| H  | 3.12764  | -3.05910 | 0.51432  |
| C  | 0.58012  | -6.51329 | 1.17993  |
| C  | -3.67510 | -2.52767 | -3.67922 |
| H  | -3.98590 | -1.54158 | -4.03618 |
| C  | -4.23663 | -3.67789 | -4.20862 |
| H  | -4.99885 | -3.59667 | -4.98997 |
| C  | -3.83685 | -4.95194 | -3.75338 |
| H  | -4.28234 | -5.85583 | -4.17516 |
| C  | 2.22126  | -0.13754 | 2.07080  |
| H  | 1.36974  | 0.53956  | 2.17041  |
| C  | 4.39006  | -1.88236 | 1.79906  |
| H  | 5.24764  | -2.54750 | 1.66624  |
| C  | 4.51488  | -0.72924 | 2.58753  |
| H  | 5.46072  | -0.50238 | 3.08548  |
| C  | 3.42126  | 0.14224  | 2.71376  |
| H  | 3.51067  | 1.04932  | 3.31727  |
| N  | 0.89055  | 1.46790  | -1.12680 |
| N  | -1.07873 | 1.58292  | 0.71809  |
| C  | -0.47510 | 2.76715  | 0.37837  |
| C  | 0.58289  | 2.70882  | -0.61081 |
| C  | 0.93861  | 5.12101  | -0.43116 |
| H  | 1.46983  | 6.01450  | -0.74852 |
| C  | -0.73657 | 4.03062  | 0.93989  |
| H  | -1.49514 | 4.10053  | 1.71790  |
| C  | 1.27386  | 3.88049  | -1.02098 |
| C  | 2.56997  | 2.42657  | -2.55241 |
| C  | 1.82041  | 1.32420  | -2.03776 |
| C  | -0.04873 | 5.20198  | 0.55358  |
| C  | 2.30446  | 3.73180  | -2.03999 |
| C  | -2.26417 | 1.47432  | 1.45092  |
| C  | 3.06310  | 4.81204  | -2.55656 |
| H  | 2.88999  | 5.82504  | -2.19081 |
| C  | -3.35776 | 2.36802  | 1.33601  |
| H  | -3.29077 | 3.22285  | 0.66100  |
| C  | -0.41292 | 6.53548  | 1.24180  |
| C  | 3.56191  | 2.23002  | -3.54711 |
| H  | 3.74222  | 1.21791  | -3.92005 |
| C  | 4.28420  | 3.30500  | -4.03234 |
| H  | 5.04872  | 3.15747  | -4.79928 |
| C  | 4.02852  | 4.60135  | -3.52979 |
| H  | 4.59989  | 5.45098  | -3.91355 |
| C  | -2.43261 | 0.35434  | 2.30161  |
| H  | -1.60751 | -0.35678 | 2.40260  |
| C  | -4.54107 | 2.15428  | 2.04884  |

|   |          |          |          |
|---|----------|----------|----------|
| H | -5.36788 | 2.86151  | 1.93005  |
| C | -4.68482 | 1.04720  | 2.89441  |
| H | -5.61286 | 0.88626  | 3.44925  |
| C | -3.61891 | 0.14519  | 3.00722  |
| H | -3.70838 | -0.73133 | 3.65619  |
| H | -2.41135 | -0.46729 | -2.42704 |
| H | 2.02036  | 0.31261  | -2.40702 |
| C | -0.14313 | 6.41819  | 2.76099  |
| H | -0.39627 | 7.36566  | 3.26556  |
| H | -0.74396 | 5.62016  | 3.22377  |
| H | 0.92012  | 6.20169  | 2.95645  |
| C | -1.91148 | 6.84278  | 1.01053  |
| H | -2.56111 | 6.05829  | 1.42830  |
| H | -2.18212 | 7.79591  | 1.49476  |
| H | -2.13348 | 6.93215  | -0.06575 |
| C | 0.40860  | 7.71945  | 0.69858  |
| H | 1.48894  | 7.57896  | 0.86151  |
| H | 0.24191  | 7.87420  | -0.37931 |
| H | 0.11014  | 8.64345  | 1.21908  |
| C | 0.22442  | -6.44052 | 2.68407  |
| H | 0.54040  | -7.36532 | 3.19494  |
| H | 0.72442  | -5.59508 | 3.18252  |
| H | -0.86265 | -6.32579 | 2.82641  |
| C | 2.10926  | -6.68857 | 1.02398  |
| H | 2.66615  | -5.85320 | 1.47659  |
| H | 2.43774  | -7.61709 | 1.51980  |
| H | 2.39204  | -6.75101 | -0.03979 |
| C | -0.11203 | -7.74856 | 0.57605  |
| H | -1.20692 | -7.70145 | 0.68810  |
| H | 0.11829  | -7.86381 | -0.49520 |
| H | 0.23773  | -8.65601 | 1.09344  |

(<sup>t</sup>BuL3)<sub>2</sub>Zn (T<sub>1,eq</sub>) B3LYP (SMD “dichloromethane”/ def2-tzvpp def2/j)

|    |          |          |          |
|----|----------|----------|----------|
| Zn | 0.23929  | -0.01158 | -0.18827 |
| N  | -0.91650 | -1.43950 | -1.14700 |
| N  | 1.08788  | -1.59920 | 0.65604  |
| C  | 0.47050  | -2.77427 | 0.30772  |
| C  | -0.60644 | -2.69123 | -0.65947 |
| C  | -0.97824 | -5.10276 | -0.51320 |
| H  | -1.52405 | -5.98614 | -0.83385 |
| C  | 0.73215  | -4.04917 | 0.84274  |
| H  | 1.50416  | -4.13855 | 1.60525  |
| C  | -1.31453 | -3.85038 | -1.07611 |
| C  | -2.63363 | -2.35954 | -2.55199 |
| C  | -1.86546 | -1.27225 | -2.03358 |
| C  | 0.02605  | -5.20810 | 0.45156  |
| C  | -2.36514 | -3.67616 | -2.07070 |
| C  | 2.28951  | -1.50472 | 1.36297  |
| C  | -3.14135 | -4.74134 | -2.59192 |
| H  | -2.96663 | -5.76279 | -2.25127 |
| C  | 3.37253  | -2.40773 | 1.22314  |
| H  | 3.28646  | -3.25786 | 0.54469  |
| C  | 0.38670  | -6.55567 | 1.11587  |
| C  | -3.64632 | -2.13804 | -3.51996 |
| H  | -3.82929 | -1.11810 | -3.86938 |
| C  | -4.38568 | -3.19887 | -4.00934 |
| H  | -5.16644 | -3.03189 | -4.75568 |
| C  | -4.12648 | -4.50582 | -3.53883 |
| H  | -4.71104 | -5.34456 | -3.92670 |
| C  | 2.48683  | -0.38901 | 2.21346  |

|   |          |          |          |
|---|----------|----------|----------|
| H | 1.67239  | 0.33161  | 2.33292  |
| C | 4.57102  | -2.20849 | 1.91394  |
| H | 5.38838  | -2.92323 | 1.77603  |
| C | 4.74186  | -1.10736 | 2.76126  |
| H | 5.68168  | -0.95831 | 3.29940  |
| C | 3.68801  | -0.19507 | 2.89703  |
| H | 3.79880  | 0.67829  | 3.54698  |
| N | 1.14098  | 1.51014  | -1.10812 |
| N | -0.85548 | 1.51534  | 0.68858  |
| C | -0.35924 | 2.73147  | 0.33872  |
| C | 0.72500  | 2.71538  | -0.63683 |
| C | 0.81151  | 5.14406  | -0.47512 |
| H | 1.26208  | 6.08016  | -0.79955 |
| C | -0.76124 | 3.97378  | 0.90807  |
| H | -1.51189 | 3.95491  | 1.69768  |
| C | 1.28569  | 3.95235  | -1.05630 |
| C | 2.76474  | 2.62510  | -2.55496 |
| C | 2.15612  | 1.47170  | -2.04397 |
| C | -0.19444 | 5.18470  | 0.52192  |
| C | 2.34646  | 3.92589  | -2.07922 |
| C | -2.04351 | 1.30271  | 1.38287  |
| C | 2.96175  | 5.07052  | -2.60542 |
| H | 2.65505  | 6.06079  | -2.26132 |
| C | -3.20907 | 2.08886  | 1.20323  |
| H | -3.20461 | 2.91058  | 0.48554  |
| C | -0.64366 | 6.49958  | 1.19524  |
| C | 3.80192  | 2.56186  | -3.54399 |
| H | 4.12266  | 1.57999  | -3.90459 |
| C | 4.38698  | 3.71561  | -4.03565 |
| H | 5.17664  | 3.64439  | -4.79005 |
| C | 3.97231  | 4.98316  | -3.57318 |
| H | 4.43490  | 5.89277  | -3.96425 |
| C | -2.11451 | 0.18704  | 2.25279  |
| H | -1.22818 | -0.43865 | 2.38232  |
| C | -4.38056 | 1.78289  | 1.89631  |
| H | -5.27351 | 2.39266  | 1.73263  |
| C | -4.42519 | 0.69917  | 2.78244  |
| H | -5.34565 | 0.46812  | 3.32484  |
| C | -3.28498 | -0.09834 | 2.95209  |
| H | -3.31023 | -0.95390 | 3.63252  |
| H | -2.06665 | -0.25255 | -2.37881 |
| H | 2.46844  | 0.48017  | -2.38091 |
| C | -0.29867 | 6.44434  | 2.70198  |
| H | -0.61456 | 7.37427  | 3.20453  |
| H | -0.80334 | 5.60532  | 3.20700  |
| H | 0.78664  | 6.32837  | 2.85813  |
| C | -2.17097 | 6.67435  | 1.03046  |
| H | -2.73339 | 5.85076  | 1.49775  |
| H | -2.50314 | 7.61237  | 1.50632  |
| H | -2.45522 | 6.71697  | -0.03413 |
| C | 0.04863  | 7.73216  | 0.58545  |
| H | 1.14270  | 7.69971  | 0.71132  |
| H | -0.16839 | 7.83925  | -0.48970 |
| H | -0.31176 | 8.64457  | 1.08723  |
| C | 0.13994  | -6.45702 | 2.63971  |
| H | 0.38761  | -7.41345 | 3.13042  |
| H | 0.75642  | -5.67420 | 3.10843  |
| H | -0.91691 | -6.23020 | 2.85798  |
| C | 1.87773  | -6.87698 | 0.86101  |
| H | 2.54516  | -6.11133 | 1.28610  |
| H | 2.14485  | -7.84232 | 1.32307  |
| H | 2.09095  | -6.94980 | -0.21849 |

|   |          |          |          |
|---|----------|----------|----------|
| C | -0.45440 | -7.72355 | 0.56910  |
| H | -1.53161 | -7.57946 | 0.74978  |
| H | -0.30644 | -7.86961 | -0.51292 |
| H | -0.15946 | -8.65911 | 1.07121  |

(<sup>t</sup>BuL3)<sub>2</sub>Zn (S<sub>0,eq</sub>) B3LYP (SMD “diethyl ether”/ def2-tzvpp def2/j)

|    |          |          |          |
|----|----------|----------|----------|
| Zn | 0.00001  | -0.00000 | 0.00478  |
| N  | -1.06985 | -1.46234 | -1.01079 |
| N  | 0.98326  | -1.56536 | 0.73899  |
| C  | 0.43682  | -2.76138 | 0.35314  |
| C  | -0.66607 | -2.70971 | -0.58726 |
| C  | -0.87559 | -5.14452 | -0.53861 |
| H  | -1.37060 | -6.04826 | -0.88384 |
| C  | 0.79399  | -4.03802 | 0.82604  |
| H  | 1.58668  | -4.10703 | 1.56926  |
| C  | -1.30694 | -3.89511 | -1.03863 |
| C  | -2.76223 | -2.43261 | -2.41172 |
| C  | -2.05402 | -1.32005 | -1.86231 |
| C  | 0.15643  | -5.22297 | 0.39947  |
| C  | -2.39216 | -3.74809 | -1.99962 |
| C  | 2.18518  | -1.42467 | 1.43815  |
| C  | -3.10828 | -4.83898 | -2.55265 |
| H  | -2.85519 | -5.86040 | -2.26554 |
| C  | 3.32720  | -2.23737 | 1.23187  |
| H  | 3.29025  | -3.04983 | 0.50420  |
| C  | 0.61890  | -6.56999 | 0.99844  |
| C  | -3.81429 | -2.23819 | -3.34266 |
| H  | -4.07696 | -1.21861 | -3.63835 |
| C  | -4.49309 | -3.32370 | -3.86398 |
| H  | -5.30410 | -3.17684 | -4.58180 |
| C  | -4.13254 | -4.62958 | -3.46303 |
| H  | -4.66901 | -5.48824 | -3.87610 |
| C  | 2.31480  | -0.35018 | 2.35157  |
| H  | 1.45272  | 0.30143  | 2.52207  |
| C  | 4.51862  | -1.99417 | 1.92037  |
| H  | 5.38292  | -2.63844 | 1.73081  |
| C  | 4.62274  | -0.93641 | 2.83114  |
| H  | 5.55725  | -0.75291 | 3.36792  |
| C  | 3.50904  | -0.11214 | 3.03307  |
| H  | 3.56675  | 0.72602  | 3.73424  |
| N  | 1.06986  | 1.46234  | -1.01078 |
| N  | -0.98325 | 1.56534  | 0.73899  |
| C  | -0.43682 | 2.76138  | 0.35314  |
| C  | 0.66608  | 2.70972  | -0.58726 |
| C  | 0.87559  | 5.14452  | -0.53861 |
| H  | 1.37060  | 6.04826  | -0.88384 |
| C  | -0.79399 | 4.03801  | 0.82604  |
| H  | -1.58668 | 4.10702  | 1.56925  |
| C  | 1.30694  | 3.89511  | -1.03863 |
| C  | 2.76224  | 2.43262  | -2.41171 |
| C  | 2.05404  | 1.32005  | -1.86231 |
| C  | -0.15643 | 5.22297  | 0.39946  |
| C  | 2.39216  | 3.74809  | -1.99962 |
| C  | -2.18518 | 1.42467  | 1.43815  |
| C  | 3.10828  | 4.83898  | -2.55265 |
| H  | 2.85518  | 5.86040  | -2.26553 |
| C  | -3.32719 | 2.23737  | 1.23187  |
| H  | -3.29025 | 3.04983  | 0.50420  |
| C  | -0.61891 | 6.56998  | 0.99843  |
| C  | 3.81431  | 2.23820  | -3.34266 |

|   |          |          |          |
|---|----------|----------|----------|
| H | 4.07698  | 1.21862  | -3.63834 |
| C | 4.49310  | 3.32371  | -3.86397 |
| H | 5.30411  | 3.17685  | -4.58179 |
| C | 4.13254  | 4.62960  | -3.46303 |
| H | 4.66901  | 5.48825  | -3.87610 |
| C | -2.31479 | 0.35018  | 2.35157  |
| H | -1.45272 | -0.30144 | 2.52207  |
| C | -4.51862 | 1.99416  | 1.92038  |
| H | -5.38292 | 2.63844  | 1.73081  |
| C | -4.62273 | 0.93641  | 2.83114  |
| H | -5.55725 | 0.75291  | 3.36792  |
| C | -3.50903 | 0.11214  | 3.03308  |
| H | -3.56674 | -0.72602 | 3.73424  |
| H | -2.33431 | -0.30140 | -2.15117 |
| H | 2.33433  | 0.30140  | -2.15116 |
| C | -0.39001 | 6.55411  | 2.52812  |
| H | -0.71214 | 7.51017  | 2.97447  |
| H | -0.95624 | 5.74948  | 3.02250  |
| H | 0.67647  | 6.41207  | 2.76959  |
| C | -2.12405 | 6.77670  | 0.71027  |
| H | -2.74487 | 5.98651  | 1.16022  |
| H | -2.46460 | 7.74054  | 1.12489  |
| H | -2.32480 | 6.78694  | -0.37403 |
| C | 0.14883  | 7.76846  | 0.41163  |
| H | 1.23004  | 7.70828  | 0.61446  |
| H | 0.01003  | 7.85612  | -0.67795 |
| H | -0.21822 | 8.70286  | 0.86622  |
| C | 0.38999  | -6.55411 | 2.52812  |
| H | 0.71212  | -7.51017 | 2.97448  |
| H | 0.95623  | -5.74949 | 3.02251  |
| H | -0.67649 | -6.41207 | 2.76959  |
| C | 2.12404  | -6.77672 | 0.71028  |
| H | 2.74485  | -5.98653 | 1.16024  |
| H | 2.46459  | -7.74055 | 1.12491  |
| H | 2.32479  | -6.78695 | -0.37401 |
| C | -0.14885 | -7.76847 | 0.41164  |
| H | -1.23006 | -7.70827 | 0.61446  |
| H | -0.01004 | -7.85612 | -0.67795 |
| H | 0.21820  | -8.70286 | 0.86623  |

(<sup>t</sup>BuL3)<sub>2</sub>Zn (S<sub>1,eq</sub>) B3LYP (SMD “diethyl ether”/ def2-tzvpp def2/j)

|    |          |          |          |
|----|----------|----------|----------|
| Zn | -0.26442 | 0.00953  | -0.16471 |
| N  | -1.10471 | -1.49077 | -1.15444 |
| N  | 0.83566  | -1.52163 | 0.69002  |
| C  | 0.33302  | -2.75618 | 0.31928  |
| C  | -0.70045 | -2.73463 | -0.68716 |
| C  | -0.80720 | -5.16810 | -0.53615 |
| H  | -1.24927 | -6.09436 | -0.89644 |
| C  | 0.68126  | -3.97657 | 0.91433  |
| H  | 1.38514  | -3.96476 | 1.74612  |
| C  | -1.23956 | -3.94260 | -1.14106 |
| C  | -2.62996 | -2.60800 | -2.69724 |
| C  | -2.05969 | -1.46137 | -2.12476 |
| C  | 0.12220  | -5.21086 | 0.49339  |
| C  | -2.23573 | -3.91584 | -2.22124 |
| C  | 2.04784  | -1.32287 | 1.30252  |
| C  | -2.81128 | -5.05444 | -2.79734 |
| H  | -2.51955 | -6.04796 | -2.45092 |
| C  | 3.16948  | -2.19489 | 1.17709  |
| H  | 3.10020  | -3.07750 | 0.54093  |

|   |          |          |          |
|---|----------|----------|----------|
| C | 0.55650  | -6.51440 | 1.19045  |
| C | -3.61169 | -2.53052 | -3.74240 |
| H | -3.91717 | -1.54452 | -4.10392 |
| C | -4.16164 | -3.68081 | -4.28322 |
| H | -4.90918 | -3.59985 | -5.07855 |
| C | -3.76942 | -4.95445 | -3.82186 |
| H | -4.20626 | -5.85814 | -4.25279 |
| C | 2.21964  | -0.12561 | 2.05736  |
| H | 1.37343  | 0.55906  | 2.14911  |
| C | 4.37348  | -1.89274 | 1.80655  |
| H | 5.22591  | -2.56596 | 1.68171  |
| C | 4.50916  | -0.72902 | 2.57794  |
| H | 5.45766  | -0.50258 | 3.07080  |
| C | 3.42266  | 0.15333  | 2.69303  |
| H | 3.52072  | 1.06834  | 3.28298  |
| N | 0.87096  | 1.46499  | -1.12567 |
| N | -1.07751 | 1.58266  | 0.74146  |
| C | -0.47753 | 2.76482  | 0.39295  |
| C | 0.57067  | 2.70559  | -0.60688 |
| C | 0.92900  | 5.11757  | -0.43417 |
| H | 1.45686  | 6.01081  | -0.75750 |
| C | -0.73412 | 4.03003  | 0.95369  |
| H | -1.48593 | 4.10037  | 1.73822  |
| C | 1.25867  | 3.87671  | -1.02492 |
| C | 2.53819  | 2.41957  | -2.56789 |
| C | 1.79080  | 1.31907  | -2.04617 |
| C | -0.05021 | 5.20001  | 0.55896  |
| C | 2.27977  | 3.72533  | -2.05291 |
| C | -2.25354 | 1.48027  | 1.49253  |
| C | 3.03620  | 4.80381  | -2.57621 |
| H | 2.86809  | 5.81684  | -2.20838 |
| C | -3.35276 | 2.36502  | 1.37125  |
| H | -3.29769 | 3.20480  | 0.67637  |
| C | -0.40918 | 6.53505  | 1.24712  |
| C | 3.52081  | 2.22198  | -3.57148 |
| H | 3.69611  | 1.20984  | -3.94683 |
| C | 4.24099  | 3.29533  | -4.06287 |
| H | 4.99828  | 3.14640  | -4.83666 |
| C | 3.99259  | 4.59191  | -3.55775 |
| H | 4.56226  | 5.44050  | -3.94623 |
| C | -2.40381 | 0.37802  | 2.36795  |
| H | -1.57326 | -0.32602 | 2.47264  |
| C | -4.52599 | 2.16007  | 2.10260  |
| H | -5.35877 | 2.85925  | 1.97862  |
| C | -4.65223 | 1.07061  | 2.97309  |
| H | -5.57265 | 0.91595  | 3.54211  |
| C | -3.58024 | 0.17725  | 3.09214  |
| H | -3.65710 | -0.68583 | 3.76033  |
| H | -2.38261 | -0.47158 | -2.46001 |
| H | 1.98334  | 0.30690  | -2.41801 |
| C | -0.12839 | 6.42124  | 2.76446  |
| H | -0.37809 | 7.36942  | 3.26947  |
| H | -0.72499 | 5.62393  | 3.23373  |
| H | 0.93615  | 6.20516  | 2.95287  |
| C | -1.90923 | 6.84185  | 1.02542  |
| H | -2.55607 | 6.05814  | 1.44878  |
| H | -2.17759 | 7.79583  | 1.50930  |
| H | -2.13874 | 6.92852  | -0.04942 |
| C | 0.40835  | 7.71793  | 0.69563  |
| H | 1.48989  | 7.57777  | 0.85070  |
| H | 0.23336  | 7.87121  | -0.38116 |
| H | 0.11457  | 8.64335  | 1.21628  |

|   |          |          |          |
|---|----------|----------|----------|
| C | 0.17738  | -6.44246 | 2.68879  |
| H | 0.48779  | -7.36590 | 3.20553  |
| H | 0.66643  | -5.59565 | 3.19573  |
| H | -0.91193 | -6.33044 | 2.81435  |
| C | 2.08823  | -6.68644 | 1.05782  |
| H | 2.63702  | -5.85046 | 1.51921  |
| H | 2.41224  | -7.61423 | 1.55796  |
| H | 2.38760  | -6.74742 | -0.00142 |
| C | -0.12324 | -7.75145 | 0.57650  |
| H | -1.21985 | -7.70634 | 0.67068  |
| H | 0.12468  | -7.86732 | -0.49072 |
| H | 0.21912  | -8.65847 | 1.09960  |

(<sup>t</sup>BuL3)<sub>2</sub>Zn (T<sub>1,eq</sub>) B3LYP (SMD “diethyl ether”/ def2-tzvpp def2/j)

|    |          |          |          |
|----|----------|----------|----------|
| Zn | 0.25350  | -0.01157 | -0.18766 |
| N  | -0.89637 | -1.44591 | -1.14883 |
| N  | 1.08543  | -1.59266 | 0.68028  |
| C  | 0.47212  | -2.76872 | 0.33306  |
| C  | -0.59327 | -2.69327 | -0.64765 |
| C  | -0.96699 | -5.10333 | -0.48797 |
| H  | -1.50857 | -5.98942 | -0.80810 |
| C  | 0.72796  | -4.04016 | 0.87973  |
| H  | 1.49143  | -4.12269 | 1.65163  |
| C  | -1.29704 | -3.85571 | -1.06362 |
| C  | -2.59835 | -2.37535 | -2.56593 |
| C  | -1.83450 | -1.28493 | -2.04781 |
| C  | 0.02683  | -5.20132 | 0.48873  |
| C  | -2.33639 | -3.68815 | -2.07079 |
| C  | 2.27595  | -1.49829 | 1.40814  |
| C  | -3.10846 | -4.75642 | -2.59173 |
| H  | -2.93863 | -5.77506 | -2.24044 |
| C  | 3.36509  | -2.39313 | 1.27056  |
| H  | 3.29255  | -3.23304 | 0.57764  |
| C  | 0.38023  | -6.54407 | 1.16643  |
| C  | -3.60018 | -2.16149 | -3.54672 |
| H  | -3.77881 | -1.14459 | -3.90729 |
| C  | -4.33543 | -3.22527 | -4.03528 |
| H  | -5.10778 | -3.06358 | -4.79151 |
| C  | -4.08294 | -4.52829 | -3.55096 |
| H  | -4.66425 | -5.36973 | -3.93797 |
| C  | 2.45338  | -0.39405 | 2.27616  |
| H  | 1.63330  | 0.32049  | 2.39316  |
| C  | 4.55211  | -2.19759 | 1.98128  |
| H  | 5.37586  | -2.90523 | 1.84497  |
| C  | 4.70373  | -1.10777 | 2.84634  |
| H  | 5.63490  | -0.96095 | 3.39989  |
| C  | 3.64347  | -0.20329 | 2.97965  |
| H  | 3.74028  | 0.66143  | 3.64320  |
| N  | 1.14884  | 1.50546  | -1.11927 |
| N  | -0.85009 | 1.51748  | 0.67488  |
| C  | -0.35730 | 2.73224  | 0.31644  |
| C  | 0.72696  | 2.71198  | -0.65945 |
| C  | 0.80275  | 5.14175  | -0.51953 |
| H  | 1.24915  | 6.07670  | -0.85276 |
| C  | -0.76286 | 3.97794  | 0.87674  |
| H  | -1.51133 | 3.96158  | 1.66851  |
| C  | 1.28080  | 3.94823  | -1.09170 |
| C  | 2.76521  | 2.61472  | -2.57876 |
| C  | 2.16427  | 1.46310  | -2.05524 |
| C  | -0.20145 | 5.18719  | 0.48032  |

|   |          |          |          |
|---|----------|----------|----------|
| C | 2.33888  | 3.91734  | -2.11673 |
| C | -2.03743 | 1.30621  | 1.37033  |
| C | 2.94488  | 5.06005  | -2.65742 |
| H | 2.63158  | 6.05223  | -2.32492 |
| C | -3.20479 | 2.08873  | 1.18682  |
| H | -3.20216 | 2.90632  | 0.46436  |
| C | -0.65172 | 6.50591  | 1.14537  |
| C | 3.80158  | 2.54747  | -3.56757 |
| H | 4.12944  | 1.56397  | -3.91703 |
| C | 4.37759  | 3.69919  | -4.07325 |
| H | 5.16707  | 3.62499  | -4.82749 |
| C | 3.95405  | 4.96877  | -3.62523 |
| H | 4.40930  | 5.87705  | -4.02783 |
| C | -2.10667 | 0.19512  | 2.24612  |
| H | -1.21942 | -0.42874 | 2.37836  |
| C | -4.37559 | 1.78425  | 1.88154  |
| H | -5.26979 | 2.39142  | 1.71458  |
| C | -4.41826 | 0.70535  | 2.77325  |
| H | -5.33824 | 0.47537  | 3.31694  |
| C | -3.27658 | -0.08887 | 2.94660  |
| H | -3.30001 | -0.94127 | 3.63108  |
| H | -2.02946 | -0.26768 | -2.40396 |
| H | 2.48329  | 0.46993  | -2.38052 |
| C | -0.29553 | 6.46545  | 2.64998  |
| H | -0.61095 | 7.39824  | 3.14765  |
| H | -0.79264 | 5.62889  | 3.16646  |
| H | 0.79120  | 6.35437  | 2.79927  |
| C | -2.18078 | 6.67351  | 0.98977  |
| H | -2.73748 | 5.85298  | 1.46921  |
| H | -2.51412 | 7.61486  | 1.45831  |
| H | -2.47304 | 6.70395  | -0.07305 |
| C | 0.03082  | 7.73629  | 0.52019  |
| H | 1.12576  | 7.71087  | 0.63998  |
| H | -0.19310 | 7.83287  | -0.55457 |
| H | -0.33055 | 8.65200  | 1.01527  |
| C | 0.11608  | -6.43482 | 2.68657  |
| H | 0.35808  | -7.38741 | 3.18759  |
| H | 0.72650  | -5.64842 | 3.15710  |
| H | -0.94308 | -6.20615 | 2.89113  |
| C | 1.87398  | -6.86663 | 0.93005  |
| H | 2.53682  | -6.09822 | 1.35721  |
| H | 2.13713  | -7.82890 | 1.40086  |
| H | 2.09928  | -6.94572 | -0.14651 |
| C | -0.45427 | -7.71617 | 0.61857  |
| H | -1.53353 | -7.57170 | 0.78650  |
| H | -0.29413 | -7.87010 | -0.46065 |
| H | -0.16506 | -8.64851 | 1.12998  |

(<sup>18</sup>BuL3)<sub>2</sub>Zn (S<sub>0,eq</sub>) B3LYP (SMD “toluene”/ def2-tzvpp def2/j)

|    |          |          |          |
|----|----------|----------|----------|
| Zn | 0.00000  | 0.00000  | 0.02193  |
| N  | -1.07930 | -1.45945 | -0.99337 |
| N  | 0.98914  | -1.56711 | 0.73742  |
| C  | 0.44104  | -2.76112 | 0.35173  |
| C  | -0.67002 | -2.70735 | -0.57930 |
| C  | -0.87565 | -5.14220 | -0.53994 |
| H  | -1.37195 | -6.04548 | -0.88414 |
| C  | 0.80410  | -4.03976 | 0.81516  |
| H  | 1.60265  | -4.10973 | 1.55183  |
| C  | -1.31373 | -3.89190 | -1.03005 |
| C  | -2.78639 | -2.42448 | -2.37979 |

|   |          |          |          |
|---|----------|----------|----------|
| C | -2.07336 | -1.31406 | -1.83252 |
| C | 0.16488  | -5.22305 | 0.38867  |
| C | -2.40889 | -3.74133 | -1.97887 |
| C | 2.19427  | -1.42822 | 1.43304  |
| C | -3.12912 | -4.83029 | -2.53035 |
| H | -2.87004 | -5.85233 | -2.25129 |
| C | 3.33731  | -2.23481 | 1.21269  |
| H | 3.29812  | -3.04001 | 0.47716  |
| C | 0.63408  | -6.57213 | 0.97803  |
| C | -3.84956 | -2.22804 | -3.29749 |
| H | -4.11851 | -1.20764 | -3.58454 |
| C | -4.53194 | -3.31175 | -3.81716 |
| H | -5.35151 | -3.16250 | -4.52454 |
| C | -4.16387 | -4.61884 | -3.42774 |
| H | -4.70293 | -5.47645 | -3.83937 |
| C | 2.32429  | -0.36203 | 2.35501  |
| H | 1.46055  | 0.28450  | 2.53574  |
| C | 4.53136  | -1.99395 | 1.89696  |
| H | 5.39697  | -2.63318 | 1.69721  |
| C | 4.63625  | -0.94429 | 2.81636  |
| H | 5.57285  | -0.76236 | 3.34976  |
| C | 3.52119  | -0.12595 | 3.03192  |
| H | 3.57997  | 0.70592  | 3.74020  |
| N | 1.07931  | 1.45945  | -0.99337 |
| N | -0.98914 | 1.56712  | 0.73743  |
| C | -0.44103 | 2.76112  | 0.35172  |
| C | 0.67002  | 2.70735  | -0.57930 |
| C | 0.87566  | 5.14220  | -0.53995 |
| H | 1.37195  | 6.04548  | -0.88414 |
| C | -0.80409 | 4.03976  | 0.81516  |
| H | -1.60264 | 4.10974  | 1.55183  |
| C | 1.31373  | 3.89190  | -1.03006 |
| C | 2.78639  | 2.42448  | -2.37979 |
| C | 2.07336  | 1.31406  | -1.83252 |
| C | -0.16487 | 5.22305  | 0.38867  |
| C | 2.40889  | 3.74134  | -1.97888 |
| C | -2.19428 | 1.42823  | 1.43303  |
| C | 3.12912  | 4.83030  | -2.53036 |
| H | 2.87003  | 5.85233  | -2.25130 |
| C | -3.33731 | 2.23481  | 1.21267  |
| H | -3.29812 | 3.04001  | 0.47715  |
| C | -0.63407 | 6.57214  | 0.97803  |
| C | 3.84956  | 2.22803  | -3.29749 |
| H | 4.11851  | 1.20764  | -3.58454 |
| C | 4.53194  | 3.31175  | -3.81717 |
| H | 5.35151  | 3.16249  | -4.52455 |
| C | 4.16387  | 4.61884  | -3.42775 |
| H | 4.70293  | 5.47645  | -3.83938 |
| C | -2.32430 | 0.36202  | 2.35499  |
| H | -1.46056 | -0.28451 | 2.53573  |
| C | -4.53137 | 1.99394  | 1.89694  |
| H | -5.39698 | 2.63317  | 1.69718  |
| C | -4.63626 | 0.94428  | 2.81633  |
| H | -5.57287 | 0.76235  | 3.34971  |
| C | -3.52121 | 0.12594  | 3.03189  |
| H | -3.57998 | -0.70594 | 3.74016  |
| H | -2.35805 | -0.29384 | -2.11155 |
| H | 2.35804  | 0.29384  | -2.11155 |
| C | -0.41609 | 6.56410  | 2.50935  |
| H | -0.74389 | 7.52108  | 2.94957  |
| H | -0.98308 | 5.76017  | 3.00368  |
| H | 0.64871  | 6.42549  | 2.75932  |

|   |          |          |          |
|---|----------|----------|----------|
| C | -2.13733 | 6.77536  | 0.67799  |
| H | -2.76049 | 5.98651  | 1.12678  |
| H | -2.48309 | 7.74036  | 1.08552  |
| H | -2.33064 | 6.77987  | -0.40756 |
| C | 0.13559  | 7.76955  | 0.39142  |
| H | 1.21523  | 7.71318  | 0.60321  |
| H | 0.00495  | 7.85208  | -0.69955 |
| H | -0.23650 | 8.70571  | 0.83814  |
| C | 0.41609  | -6.56410 | 2.50935  |
| H | 0.74390  | -7.52108 | 2.94956  |
| H | 0.98309  | -5.76017 | 3.00368  |
| H | -0.64870 | -6.42548 | 2.75932  |
| C | 2.13734  | -6.77536 | 0.67799  |
| H | 2.76050  | -5.98651 | 1.12678  |
| H | 2.48310  | -7.74036 | 1.08552  |
| H | 2.33065  | -6.77987 | -0.40756 |
| C | -0.13558 | -7.76955 | 0.39141  |
| H | -1.21522 | -7.71317 | 0.60321  |
| H | -0.00495 | -7.85207 | -0.69955 |
| H | 0.23650  | -8.70570 | 0.83815  |

(<sup>t</sup>BuL3)<sub>2</sub>Zn (S<sub>1,eq</sub>) B3LYP (SMD “toluene”/ def2-tzvpp def2/j)

|    |          |          |          |
|----|----------|----------|----------|
| Zn | -0.30693 | 0.00583  | -0.14607 |
| N  | -1.10668 | -1.49503 | -1.16135 |
| N  | 0.80185  | -1.51632 | 0.71497  |
| C  | 0.31225  | -2.76082 | 0.32969  |
| C  | -0.69797 | -2.74361 | -0.69513 |
| C  | -0.79007 | -5.17790 | -0.55482 |
| H  | -1.21611 | -6.10514 | -0.93118 |
| C  | 0.65229  | -3.97415 | 0.93130  |
| H  | 1.33749  | -3.95912 | 1.77868  |
| C  | -1.21692 | -3.95024 | -1.16617 |
| C  | -2.57779 | -2.62223 | -2.74992 |
| C  | -2.03533 | -1.47390 | -2.15393 |
| C  | 0.11127  | -5.21644 | 0.49334  |
| C  | -2.18486 | -3.92850 | -2.27066 |
| C  | 2.01459  | -1.31184 | 1.31167  |
| C  | -2.73569 | -5.06848 | -2.86610 |
| H  | -2.44494 | -6.06133 | -2.51735 |
| C  | 3.13663  | -2.18935 | 1.19826  |
| H  | 3.06270  | -3.08184 | 0.57701  |
| C  | 0.54448  | -6.51676 | 1.19631  |
| C  | -3.53294 | -2.54666 | -3.81908 |
| H  | -3.83804 | -1.56152 | -4.18297 |
| C  | -4.05931 | -3.69857 | -4.37885 |
| H  | -4.78744 | -3.61986 | -5.19207 |
| C  | -3.66847 | -4.97068 | -3.91409 |
| H  | -4.08724 | -5.87543 | -4.36020 |
| C  | 2.19568  | -0.10042 | 2.04699  |
| H  | 1.35111  | 0.58714  | 2.13113  |
| C  | 4.34247  | -1.87968 | 1.81790  |
| H  | 5.19303  | -2.55675 | 1.70155  |
| C  | 4.48480  | -0.70296 | 2.56884  |
| H  | 5.43563  | -0.47121 | 3.05444  |
| C  | 3.40104  | 0.18510  | 2.67210  |
| H  | 3.50437  | 1.10961  | 3.24595  |
| N  | 0.83065  | 1.45586  | -1.12365 |
| N  | -1.09604 | 1.58676  | 0.76402  |
| C  | -0.49179 | 2.76339  | 0.40921  |
| C  | 0.54492  | 2.69770  | -0.60241 |

|   |          |          |          |
|---|----------|----------|----------|
| C | 0.92121  | 5.10672  | -0.43445 |
| H | 1.45009  | 5.99700  | -0.76383 |
| C | -0.73281 | 4.03057  | 0.97301  |
| H | -1.47550 | 4.10478  | 1.76583  |
| C | 1.23591  | 3.86449  | -1.02881 |
| C | 2.48619  | 2.39789  | -2.58723 |
| C | 1.73737  | 1.30313  | -2.05566 |
| C | -0.04609 | 5.19524  | 0.57004  |
| C | 2.24329  | 3.70527  | -2.06874 |
| C | -2.25988 | 1.49824  | 1.53827  |
| C | 3.00142  | 4.77799  | -2.60127 |
| H | 2.84455  | 5.79180  | -2.23080 |
| C | -3.35914 | 2.38129  | 1.41510  |
| H | -3.31309 | 3.20506  | 0.70045  |
| C | -0.38864 | 6.53276  | 1.26169  |
| C | 3.45504  | 2.19448  | -3.60283 |
| H | 3.61893  | 1.18155  | -3.98130 |
| C | 4.17689  | 3.26237  | -4.10275 |
| H | 4.92337  | 3.10810  | -4.88589 |
| C | 3.94415  | 4.56030  | -3.59414 |
| H | 4.51502  | 5.40496  | -3.98926 |
| C | -2.39551 | 0.41548  | 2.43828  |
| H | -1.56377 | -0.28698 | 2.54324  |
| C | -4.52027 | 2.19383  | 2.16941  |
| H | -5.35479 | 2.89053  | 2.04397  |
| C | -4.63254 | 1.12340  | 3.06456  |
| H | -5.54380 | 0.98165  | 3.65126  |
| C | -3.56015 | 0.23156  | 3.18537  |
| H | -3.62749 | -0.61711 | 3.87264  |
| H | -2.36627 | -0.48636 | -2.48886 |
| H | 1.91658  | 0.28889  | -2.42891 |
| C | -0.09100 | 6.41793  | 2.77569  |
| H | -0.32958 | 7.36719  | 3.28409  |
| H | -0.68580 | 5.62378  | 3.25230  |
| H | 0.97424  | 6.19563  | 2.95198  |
| C | -1.88900 | 6.84929  | 1.05664  |
| H | -2.53661 | 6.07031  | 1.48720  |
| H | -2.14661 | 7.80518  | 1.54262  |
| H | -2.13017 | 6.93633  | -0.01550 |
| C | 0.42970  | 7.71057  | 0.70057  |
| H | 1.51209  | 7.56451  | 0.84387  |
| H | 0.24346  | 7.86485  | -0.37417 |
| H | 0.14783  | 8.63843  | 1.22344  |
| C | 0.12997  | -6.45427 | 2.68563  |
| H | 0.43945  | -7.37490 | 3.20794  |
| H | 0.59566  | -5.60304 | 3.20693  |
| H | -0.96306 | -6.35560 | 2.78613  |
| C | 2.08060  | -6.67242 | 1.09830  |
| H | 2.61102  | -5.83404 | 1.57659  |
| H | 2.40370  | -7.59919 | 1.60091  |
| H | 2.40535  | -6.72438 | 0.04616  |
| C | -0.10711 | -7.75925 | 0.56325  |
| H | -1.20595 | -7.72665 | 0.63260  |
| H | 0.16632  | -7.86883 | -0.49833 |
| H | 0.23253  | -8.66495 | 1.09041  |

(<sup>t</sup>BuL3)<sub>2</sub>Zn (T<sub>1,eq</sub>) B3LYP (SMD “toluene”/ def2-tzvpp def2/j)

|    |          |          |          |
|----|----------|----------|----------|
| Zn | 0.27636  | -0.00959 | -0.17916 |
| N  | -0.87787 | -1.43802 | -1.15068 |
| N  | 1.09215  | -1.59519 | 0.69040  |

|   |          |          |          |
|---|----------|----------|----------|
| C | 0.47629  | -2.76694 | 0.33778  |
| C | -0.58291 | -2.68642 | -0.64960 |
| C | -0.96631 | -5.09500 | -0.49689 |
| H | -1.50833 | -5.97904 | -0.82149 |
| C | 0.72409  | -4.04083 | 0.88309  |
| H | 1.48269  | -4.12644 | 1.65933  |
| C | -1.28866 | -3.84590 | -1.07205 |
| C | -2.57504 | -2.35744 | -2.57990 |
| C | -1.80930 | -1.27150 | -2.05531 |
| C | 0.02155  | -5.19801 | 0.48560  |
| C | -2.32122 | -3.67193 | -2.08488 |
| C | 2.27617  | -1.50908 | 1.43220  |
| C | -3.09506 | -4.73582 | -2.61210 |
| H | -2.93096 | -5.75523 | -2.26070 |
| C | 3.36513  | -2.40276 | 1.29307  |
| H | 3.29742  | -3.23274 | 0.58782  |
| C | 0.36611  | -6.54339 | 1.16299  |
| C | -3.57029 | -2.13897 | -3.56626 |
| H | -3.74304 | -1.12113 | -3.92702 |
| C | -4.30715 | -3.19864 | -4.06054 |
| H | -5.07423 | -3.03256 | -4.82103 |
| C | -4.06294 | -4.50311 | -3.57640 |
| H | -4.64530 | -5.34170 | -3.96771 |
| C | 2.44525  | -0.41625 | 2.31479  |
| H | 1.62459  | 0.29752  | 2.43158  |
| C | 4.54516  | -2.21749 | 2.01744  |
| H | 5.37001  | -2.92342 | 1.87997  |
| C | 4.68870  | -1.13895 | 2.89731  |
| H | 5.61462  | -0.99967 | 3.46125  |
| C | 3.62848  | -0.23531 | 3.03187  |
| H | 3.72001  | 0.62105  | 3.70666  |
| N | 1.15591  | 1.50894  | -1.12066 |
| N | -0.83394 | 1.51476  | 0.68389  |
| C | -0.34968 | 2.73102  | 0.31931  |
| C | 0.72865  | 2.71340  | -0.66384 |
| C | 0.79007  | 5.14338  | -0.53460 |
| H | 1.22823  | 6.07952  | -0.87496 |
| C | -0.75795 | 3.97682  | 0.87847  |
| H | -1.49981 | 3.95804  | 1.67627  |
| C | 1.27119  | 3.95193  | -1.10599 |
| C | 2.75477  | 2.62204  | -2.59655 |
| C | 2.16616  | 1.46888  | -2.06294 |
| C | -0.20687 | 5.18721  | 0.47402  |
| C | 2.32108  | 3.92325  | -2.13901 |
| C | -2.01531 | 1.29797  | 1.38737  |
| C | 2.91345  | 5.06744  | -2.69133 |
| H | 2.59399  | 6.05897  | -2.36296 |
| C | -3.18722 | 2.07620  | 1.21486  |
| H | -3.19244 | 2.89538  | 0.49436  |
| C | -0.65708 | 6.50604  | 1.13933  |
| C | 3.78472  | 2.55739  | -3.59128 |
| H | 4.11870  | 1.57461  | -3.93650 |
| C | 4.34737  | 3.71026  | -4.10797 |
| H | 5.13241  | 3.63810  | -4.86678 |
| C | 3.91592  | 4.97871  | -3.66507 |
| H | 4.36043  | 5.88810  | -4.07665 |
| C | -2.07472 | 0.18453  | 2.26085  |
| H | -1.18460 | -0.43705 | 2.38361  |
| C | -4.35164 | 1.76588  | 1.91737  |
| H | -5.24920 | 2.37019  | 1.75862  |
| C | -4.38403 | 0.68473  | 2.80635  |
| H | -5.29903 | 0.45002  | 3.35616  |

|   |          |          |          |
|---|----------|----------|----------|
| C | -3.23836 | -0.10560 | 2.96874  |
| H | -3.25364 | -0.96029 | 3.65041  |
| H | -1.99641 | -0.25252 | -2.41092 |
| H | 2.49129  | 0.47634  | -2.38346 |
| C | -0.28043 | 6.47544  | 2.63925  |
| H | -0.59510 | 7.40814  | 3.13759  |
| H | -0.76436 | 5.63806  | 3.16665  |
| H | 0.80866  | 6.37167  | 2.77479  |
| C | -2.18906 | 6.66431  | 1.00385  |
| H | -2.73510 | 5.84367  | 1.49513  |
| H | -2.52226 | 7.60590  | 1.47194  |
| H | -2.49657 | 6.68715  | -0.05472 |
| C | 0.00871  | 7.73844  | 0.49988  |
| H | 1.10507  | 7.72240  | 0.60681  |
| H | -0.22880 | 7.82856  | -0.57248 |
| H | -0.35294 | 8.65437  | 0.99428  |
| C | 0.09148  | -6.43681 | 2.68145  |
| H | 0.32814  | -7.39052 | 3.18286  |
| H | 0.69943  | -5.65234 | 3.15807  |
| H | -0.96837 | -6.20612 | 2.87925  |
| C | 1.86035  | -6.87049 | 0.93641  |
| H | 2.52296  | -6.10524 | 1.36925  |
| H | 2.11786  | -7.83432 | 1.40709  |
| H | 2.09331  | -6.94789 | -0.13850 |
| C | -0.46787 | -7.71213 | 0.60710  |
| H | -1.54782 | -7.56548 | 0.76827  |
| H | -0.30068 | -7.86477 | -0.47119 |
| H | -0.18522 | -8.64668 | 1.11808  |

(<sup>t</sup>BuL3)<sub>2</sub>Zn (S<sub>0,eq</sub>) B3LYP (SMD “n-hexane”/ def2-tzvpp def2/j)

|    |          |          |          |
|----|----------|----------|----------|
| Zn | 0.00000  | 0.00000  | 0.02981  |
| N  | -1.08520 | -1.45829 | -0.98394 |
| N  | 0.99236  | -1.56790 | 0.73579  |
| C  | 0.44313  | -2.76089 | 0.35065  |
| C  | -0.67286 | -2.70637 | -0.57453 |
| C  | -0.87622 | -5.14128 | -0.53903 |
| H  | -1.37332 | -6.04450 | -0.88207 |
| C  | 0.80984  | -4.04036 | 0.80920  |
| H  | 1.61227  | -4.11026 | 1.54164  |
| C  | -1.31842 | -3.89071 | -1.02386 |
| C  | -2.80135 | -2.42147 | -2.36055 |
| C  | -2.08517 | -1.31186 | -1.81581 |
| C  | 0.16971  | -5.22304 | 0.38358  |
| C  | -2.41973 | -3.73881 | -1.96516 |
| C  | 2.20019  | -1.43095 | 1.42812  |
| C  | -3.14283 | -4.82703 | -2.51436 |
| H  | -2.88048 | -5.84922 | -2.23913 |
| C  | 3.34391  | -2.23250 | 1.19520  |
| H  | 3.30232  | -3.03140 | 0.45289  |
| C  | 0.64346  | -6.57294 | 0.96741  |
| C  | -3.87120 | -2.22436 | -3.27028 |
| H  | -4.14353 | -1.20365 | -3.55307 |
| C  | -4.55617 | -3.30738 | -3.78774 |
| H  | -5.38090 | -3.15721 | -4.48886 |
| C  | -4.18398 | -4.61494 | -3.40396 |
| H  | -4.72494 | -5.47222 | -3.81375 |
| C  | 2.33118  | -0.37248 | 2.35819  |
| H  | 1.46624  | 0.26969  | 2.54826  |
| C  | 4.54053  | -1.99432 | 1.87569  |
| H  | 5.40698  | -2.62937 | 1.66665  |

|   |          |          |          |
|---|----------|----------|----------|
| C | 4.64675  | -0.95205 | 2.80312  |
| H | 5.58542  | -0.77192 | 3.33339  |
| C | 3.53072  | -0.13869 | 3.03109  |
| H | 3.59084  | 0.68733  | 3.74599  |
| N | 1.08521  | 1.45829  | -0.98394 |
| N | -0.99236 | 1.56790  | 0.73579  |
| C | -0.44313 | 2.76089  | 0.35065  |
| C | 0.67287  | 2.70637  | -0.57453 |
| C | 0.87622  | 5.14128  | -0.53903 |
| H | 1.37332  | 6.04449  | -0.88208 |
| C | -0.80984 | 4.04036  | 0.80919  |
| H | -1.61227 | 4.11026  | 1.54163  |
| C | 1.31842  | 3.89071  | -1.02386 |
| C | 2.80136  | 2.42148  | -2.36055 |
| C | 2.08518  | 1.31186  | -1.81581 |
| C | -0.16971 | 5.22304  | 0.38357  |
| C | 2.41973  | 3.73882  | -1.96516 |
| C | -2.20019 | 1.43094  | 1.42812  |
| C | 3.14284  | 4.82704  | -2.51436 |
| H | 2.88048  | 5.84922  | -2.23913 |
| C | -3.34391 | 2.23250  | 1.19519  |
| H | -3.30232 | 3.03140  | 0.45288  |
| C | -0.64347 | 6.57295  | 0.96740  |
| C | 3.87120  | 2.22436  | -3.27028 |
| H | 4.14355  | 1.20366  | -3.55306 |
| C | 4.55618  | 3.30739  | -3.78774 |
| H | 5.38091  | 3.15720  | -4.48886 |
| C | 4.18398  | 4.61495  | -3.40396 |
| H | 4.72494  | 5.47222  | -3.81376 |
| C | -2.33118 | 0.37248  | 2.35819  |
| H | -1.46624 | -0.26970 | 2.54825  |
| C | -4.54053 | 1.99431  | 1.87568  |
| H | -5.40698 | 2.62936  | 1.66664  |
| C | -4.64675 | 0.95204  | 2.80311  |
| H | -5.58542 | 0.77191  | 3.33338  |
| C | -3.53072 | 0.13868  | 3.03109  |
| H | -3.59084 | -0.68734 | 3.74598  |
| H | -2.37236 | -0.29104 | -2.09023 |
| H | 2.37237  | 0.29104  | -2.09022 |
| C | -0.43360 | 6.56866  | 2.49998  |
| H | -0.76518 | 7.52606  | 2.93637  |
| H | -1.00174 | 5.76478  | 2.99287  |
| H | 0.63001  | 6.43182  | 2.75548  |
| C | -2.14533 | 6.77403  | 0.65846  |
| H | -2.76994 | 5.98516  | 1.10500  |
| H | -2.49459 | 7.73932  | 1.06224  |
| H | -2.33214 | 6.77598  | -0.42815 |
| C | 0.12809  | 7.77004  | 0.38232  |
| H | 1.20651  | 7.71517  | 0.60047  |
| H | 0.00330  | 7.84967  | -0.70952 |
| H | -0.24746 | 8.70685  | 0.82468  |
| C | 0.43360  | -6.56866 | 2.49998  |
| H | 0.76517  | -7.52607 | 2.93637  |
| H | 1.00174  | -5.76479 | 2.99289  |
| H | -0.63001 | -6.43182 | 2.75549  |
| C | 2.14532  | -6.77403 | 0.65846  |
| H | 2.76994  | -5.98516 | 1.10500  |
| H | 2.49458  | -7.73932 | 1.06224  |
| H | 2.33213  | -6.77597 | -0.42815 |
| C | -0.12809 | -7.77004 | 0.38232  |
| H | -1.20652 | -7.71516 | 0.60048  |
| H | -0.00332 | -7.84966 | -0.70952 |

|   |         |          |         |
|---|---------|----------|---------|
| H | 0.24745 | -8.70685 | 0.82469 |
|---|---------|----------|---------|

(<sup>t</sup>BuL3)<sub>2</sub>Zn (S<sub>1,eq</sub>) B3LYP (SMD “n-hexane”/ def2-tzvpp def2/j)

|    |          |          |          |
|----|----------|----------|----------|
| Zn | -0.32537 | 0.00364  | -0.13761 |
| N  | -1.10178 | -1.49672 | -1.16827 |
| N  | 0.78556  | -1.51366 | 0.72859  |
| C  | 0.30061  | -2.76359 | 0.33663  |
| C  | -0.69398 | -2.74806 | -0.70034 |
| C  | -0.78418 | -5.18215 | -0.56204 |
| H  | -1.20200 | -6.10967 | -0.94667 |
| C  | 0.63133  | -3.97238 | 0.94517  |
| H  | 1.30488  | -3.95576 | 1.80192  |
| C  | -1.20301 | -3.95358 | -1.18039 |
| C  | -2.53799 | -2.62808 | -2.78611 |
| C  | -2.01159 | -1.47920 | -2.17636 |
| C  | 0.09830  | -5.21851 | 0.49895  |
| C  | -2.15080 | -3.93362 | -2.30161 |
| C  | 2.00029  | -1.30793 | 1.31294  |
| C  | -2.68798 | -5.07387 | -2.90811 |
| H  | -2.40152 | -6.06653 | -2.55553 |
| C  | 3.11994  | -2.19199 | 1.20608  |
| H  | 3.03937  | -3.09165 | 0.59635  |
| C  | 0.52604  | -6.51685 | 1.20848  |
| C  | -3.47345 | -2.55267 | -3.87221 |
| H  | -3.77445 | -1.56783 | -4.24014 |
| C  | -3.98706 | -3.70494 | -4.44272 |
| H  | -4.70065 | -3.62681 | -5.26868 |
| C  | -3.60189 | -4.97640 | -3.97262 |
| H  | -4.01084 | -5.88136 | -4.42720 |
| C  | 2.19171  | -0.08750 | 2.03410  |
| H  | 1.35010  | 0.60404  | 2.11463  |
| C  | 4.32907  | -1.87997 | 1.81649  |
| H  | 5.17628  | -2.56200 | 1.70486  |
| C  | 4.48035  | -0.69454 | 2.55237  |
| H  | 5.43429  | -0.46133 | 3.03096  |
| C  | 3.40070  | 0.19983  | 2.64938  |
| H  | 3.51085  | 1.13063  | 3.21163  |
| N  | 0.81064  | 1.45293  | -1.12363 |
| N  | -1.10244 | 1.58697  | 0.77722  |
| C  | -0.49809 | 2.76171  | 0.41880  |
| C  | 0.53131  | 2.69473  | -0.60026 |
| C  | 0.91339  | 5.10266  | -0.43446 |
| H  | 1.44100  | 5.99237  | -0.76725 |
| C  | -0.73229 | 4.02933  | 0.98487  |
| H  | -1.46934 | 4.10392  | 1.78290  |
| C  | 1.22141  | 3.86050  | -1.03155 |
| C  | 2.45643  | 2.39151  | -2.60018 |
| C  | 1.70941  | 1.29841  | -2.06284 |
| C  | -0.04647 | 5.19241  | 0.57721  |
| C  | 2.22030  | 3.69916  | -2.07916 |
| C  | -2.25820 | 1.50391  | 1.56548  |
| C  | 2.97669  | 4.77023  | -2.61739 |
| H  | 2.82467  | 5.78409  | -2.24517 |
| C  | -3.35942 | 2.38390  | 1.44287  |
| H  | -3.32089 | 3.19886  | 0.71764  |
| C  | -0.38166 | 6.53040  | 1.27155  |
| C  | 3.41683  | 2.18694  | -3.62344 |
| H  | 3.57585  | 1.17400  | -4.00403 |
| C  | 4.13701  | 3.25329  | -4.12861 |
| H  | 4.87686  | 3.09764  | -4.91771 |

|   |          |          |          |
|---|----------|----------|----------|
| C | 3.91108  | 4.55133  | -3.61757 |
| H | 4.48052  | 5.39503  | -4.01676 |
| C | -2.38228 | 0.43174  | 2.47884  |
| H | -1.54833 | -0.26815 | 2.58280  |
| C | -4.51227 | 2.20404  | 2.21123  |
| H | -5.34925 | 2.89782  | 2.08635  |
| C | -4.61339 | 1.14399  | 3.11969  |
| H | -5.51838 | 1.00779  | 3.71726  |
| C | -3.53890 | 0.25504  | 3.23990  |
| H | -3.59829 | -0.58565 | 3.93756  |
| H | -2.34395 | -0.49279 | -2.51374 |
| H | 1.88262  | 0.28357  | -2.43752 |
| C | -0.07369 | 6.41480  | 2.78339  |
| H | -0.30741 | 7.36401  | 3.29414  |
| H | -0.66581 | 5.62120  | 3.26410  |
| H | 0.99233  | 6.19082  | 2.95230  |
| C | -1.88272 | 6.84989  | 1.07669  |
| H | -2.52910 | 6.07208  | 1.51109  |
| H | -2.13581 | 7.80606  | 1.56451  |
| H | -2.13105 | 6.93739  | 0.00629  |
| C | 0.43487  | 7.70697  | 0.70520  |
| H | 1.51798  | 7.55912  | 0.84102  |
| H | 0.24136  | 7.86228  | -0.36809 |
| H | 0.15866  | 8.63541  | 1.23005  |
| C | 0.09177  | -6.45481 | 2.69214  |
| H | 0.39716  | -7.37384 | 3.21965  |
| H | 0.54726  | -5.60180 | 3.21947  |
| H | -1.00271 | -6.35937 | 2.77818  |
| C | 2.06374  | -6.66861 | 1.13058  |
| H | 2.58624  | -5.82928 | 1.61590  |
| H | 2.38326  | -7.59446 | 1.63714  |
| H | 2.40255  | -6.71931 | 0.08287  |
| C | -0.11370 | -7.76160 | 0.56791  |
| H | -1.21342 | -7.73160 | 0.62230  |
| H | 0.17442  | -7.87169 | -0.48968 |
| H | 0.22053  | -8.66634 | 1.10014  |

(<sup>Bu</sup>L3)<sub>2</sub>Zn (T<sub>1,eq</sub>) B3LYP (SMD “n-hexane”/ def2-tzvpp def2/j)

|    |          |          |          |
|----|----------|----------|----------|
| Zn | 0.28898  | -0.00817 | -0.17604 |
| N  | -0.86684 | -1.43398 | -1.15365 |
| N  | 1.09574  | -1.59595 | 0.69521  |
| C  | 0.47822  | -2.76543 | 0.34019  |
| C  | -0.57700 | -2.68268 | -0.65137 |
| C  | -0.96629 | -5.09024 | -0.50052 |
| H  | -1.50857 | -5.97334 | -0.82703 |
| C  | 0.72110  | -4.04015 | 0.88606  |
| H  | 1.47672  | -4.12677 | 1.66507  |
| C  | -1.28387 | -3.84075 | -1.07666 |
| C  | -2.56080 | -2.34898 | -2.58959 |
| C  | -1.79411 | -1.26515 | -2.06206 |
| C  | 0.01783  | -5.19542 | 0.48569  |
| C  | -2.31209 | -3.66398 | -2.09329 |
| C  | 2.27650  | -1.51507 | 1.44412  |
| C  | -3.08687 | -4.72579 | -2.62335 |
| H  | -2.92640 | -5.74534 | -2.27082 |
| C  | 3.36543  | -2.40773 | 1.30189  |
| H  | 3.29978  | -3.23120 | 0.58879  |
| C  | 0.35709  | -6.54166 | 1.16405  |
| C  | -3.55184 | -2.12860 | -3.57975 |
| H  | -3.72085 | -1.11051 | -3.94162 |

|   |          |          |          |
|---|----------|----------|----------|
| C | -4.28961 | -3.18630 | -4.07661 |
| H | -5.05336 | -3.01833 | -4.84001 |
| C | -4.05056 | -4.49122 | -3.59120 |
| H | -4.63354 | -5.32848 | -3.98440 |
| C | 2.44129  | -0.43001 | 2.33629  |
| H | 1.62015  | 0.28285  | 2.45479  |
| C | 4.54211  | -2.22919 | 2.03314  |
| H | 5.36759  | -2.93385 | 1.89338  |
| C | 4.68162  | -1.15821 | 2.92266  |
| H | 5.60502  | -1.02390 | 3.49182  |
| C | 3.62129  | -0.25544 | 3.06018  |
| H | 3.71019  | 0.59517  | 3.74245  |
| N | 1.15930  | 1.51159  | -1.12333 |
| N | -0.82447 | 1.51309  | 0.68819  |
| C | -0.34505 | 2.73038  | 0.32063  |
| C | 0.72945  | 2.71476  | -0.66698 |
| C | 0.78299  | 5.14479  | -0.54197 |
| H | 1.21635  | 6.08180  | -0.88593 |
| C | -0.75435 | 3.97578  | 0.88041  |
| H | -1.49196 | 3.95501  | 1.68207  |
| C | 1.26560  | 3.95474  | -1.11390 |
| C | 2.74777  | 2.62793  | -2.60825 |
| C | 2.16613  | 1.47357  | -2.06979 |
| C | -0.20932 | 5.18711  | 0.47197  |
| C | 2.31057  | 3.92800  | -2.15168 |
| C | -2.00264 | 1.29299  | 1.39572  |
| C | 2.89552  | 5.07337  | -2.70938 |
| H | 2.57316  | 6.06427  | -2.38197 |
| C | -3.17672 | 2.06948  | 1.22989  |
| H | -3.18588 | 2.89014  | 0.51118  |
| C | -0.65962 | 6.50548  | 1.13821  |
| C | 3.77359  | 2.56540  | -3.60696 |
| H | 4.11042  | 1.58328  | -3.95117 |
| C | 4.32899  | 3.71923  | -4.12879 |
| H | 5.11111  | 3.64869  | -4.89065 |
| C | 3.89383  | 4.98676  | -3.68703 |
| H | 4.33253  | 5.89704  | -4.10272 |
| C | -2.05705 | 0.17739  | 2.26681  |
| H | -1.16562 | -0.44345 | 2.38357  |
| C | -4.33775 | 1.75572  | 1.93636  |
| H | -5.23693 | 2.35890  | 1.78265  |
| C | -4.36491 | 0.67251  | 2.82288  |
| H | -5.27726 | 0.43506  | 3.37581  |
| C | -3.21735 | -0.11633 | 2.97851  |
| H | -3.22854 | -0.97293 | 3.65781  |
| H | -1.97655 | -0.24555 | -2.41849 |
| H | 2.49421  | 0.48168  | -2.38905 |
| C | -0.27309 | 6.47881  | 2.63583  |
| H | -0.58756 | 7.41124  | 3.13476  |
| H | -0.75055 | 5.64062  | 3.16769  |
| H | 0.81711  | 6.37852  | 2.76409  |
| C | -2.19302 | 6.65897  | 1.01217  |
| H | -2.73339 | 5.83720  | 1.50773  |
| H | -2.52642 | 7.59998  | 1.48123  |
| H | -2.50696 | 6.67929  | -0.04449 |
| C | -0.00204 | 7.73929  | 0.49264  |
| H | 1.09492  | 7.72725  | 0.59331  |
| H | -0.24626 | 7.82649  | -0.57843 |
| H | -0.36395 | 8.65487  | 0.98741  |
| C | 0.07628  | -6.43509 | 2.68149  |
| H | 0.30972  | -7.38913 | 3.18374  |
| H | 0.68294  | -5.65125 | 3.16057  |

|   |          |          |          |
|---|----------|----------|----------|
| H | -0.98403 | -6.20288 | 2.87450  |
| C | 1.85169  | -6.87158 | 0.94319  |
| H | 2.51386  | -6.10733 | 1.37826  |
| H | 2.10578  | -7.83576 | 1.41495  |
| H | 2.08829  | -6.94915 | -0.13082 |
| C | -0.47675 | -7.70887 | 0.60444  |
| H | -1.55697 | -7.56015 | 0.76158  |
| H | -0.30538 | -7.86115 | -0.47322 |
| H | -0.19782 | -8.64415 | 1.11605  |

## References

- 1 I. B. Lozada, T. Murray and D. E. Herbert, *Polyhedron*, 2019, **161**, 261–267.
- 2 Bruker-AXS. APEX3 V2016.1-0, 2016, .
- 3 G. M. Sheldrick, *Acta Cryst A*, 2015, **71**, 3–8.
- 4 O. V. Dolomanov, L. J. Bourhis, R. J. Gildea, J. a. K. Howard and H. Puschmann, *J. Appl. Cryst.*, 2009, **42**, 339–341.
- 5 C. F. Macrae, I. J. Bruno, J. A. Chisholm, P. R. Edgington, P. McCabe, E. Pidcock, L. Rodriguez-Monge, R. Taylor, J. van de Streek and P. A. Wood, *J. Appl. Cryst.*, 2008, 466–470.
- 6 F. Neese, *WIREs Comp. Mol. Sci.*, 2012, **2**, 73–78.
- 7 F. Neese, *WIREs Comp. Mol. Sci.*, 2022, **12**, e1606.
- 8 A. V. Marenich, C. J. Cramer and D. G. Truhlar, *J. Phys. Chem. B*, 2009, **113**, 6378.
- 9 E. D. Glendening, J. K. Badenhoop, A. E. Reed, J. E. Carpenter, J. A. Bohmann, C. M. Morales, P. Karafiloglou, C. R. Landis and F. Weinhold, NBO 7.0 2018.
- 10 Y. Zhao and D. G. Truhlar, *Theor Chem Account*, 2008, **120**, 215–241.
- 11 K. P. Jensen, *Inorg. Chem.*, 2008, **47**, 10357–10365.
- 12 A. J. Cohen and N. C. Handy, *Mol. Phys.*, 2001, **99**, 607–615.
- 13 M. Reiher, O. Salomon and B. Artur Hess, *Theor. Chem. Acc.*, 2001, **107**, 48–55.
- 14 C. Adamo and V. Barone, *J. Chem. Phys.*, 1999, **110**, 6158–6170.
- 15 T. Yanai, D. P. Tew and N. C. Handy, *Chem. Phys. Lett.*, 2004, **393**, 51–57.
- 16 T. Lu and F. Chen, *J. Comp. Chem.*, 2011, **33**, 580–592.
- 17 A.-R. Allouche, *J. Comp. Chem.*, 2011, **32**, 174–182.
- 18 T. Lu and F. Chen, *J. Theor. Comput. Chem.*, 2012, 163–183.
- 19 Y. Zhao and D. G. Truhlar, *J. Chem. Phys.*, 2006, **125**, 194101.
- 20 G. Frenking and S. Shaik, *The Chemical Bond: Fundamental Aspects of Chemical Bonding*, 2014.
- 21 N. C. Handy and A. J. Cohen, *Mol. Phys.*, 2001, **99**, 403–412.
- 22 P. J. Stephens, F. J. Devlin, C. F. Chabalowski and M. J. Frisch, *J. Phys. Chem.*, 1994, **98**, 11623–11627.
- 23 Y. Zhao and D. G. Truhlar, *J. Chem. Phys.*, 2008, **128**, 184109.
